# Supplementary material
Source: PubMed Central journal article supplement (PMC6592274)

## Supporting Information

| Content                                                                                                  | Page number |
|----------------------------------------------------------------------------------------------------------|-------------|
| 1. General                                                                                               | S2          |
| 2. Synthesis of compounds <b>1</b>                                                                       | S2          |
| 3. Synthesis of compounds <b>2</b>                                                                       | S8          |
| 4. General procedure C: cross-coupling between potassium alkenyltrifluoroborate and propargylic alcohols | S11         |
| 5. Synthesis of (( <i>R</i> )- <b>3h</b> )                                                               | S20         |
| 6. Diels-Alder reaction of compound <b>3k</b> with <i>N</i> -phenylmaleimide                             | S21         |
| 7. Selectively epoxidation of double bond in compound <b>3u</b>                                          | S22         |
| 8. Computational details                                                                                 | S23         |
| 9. References                                                                                            | S107        |
| 10. Chiral HPLC analysis spectra                                                                         | S108        |
| 11. <sup>1</sup> H & <sup>13</sup> C-NMR spectra                                                         | S110        |

## 1. General.

Toluene (ACS grade) and tetrahydrofuran (HPLC grade) was distilled over sodium/benzophenone under N<sub>2</sub> atmosphere. Dichloromethane (HPLC grade) and 1,2-dichloroethane (HPLC grade) were distilled over calcium hydride. Other commercially available solvents (ACS grade) and reagents were used without further purification. Reactions were monitored by thin layer chromatography (TLC) using Silicycle precoated silica gel plates. Flash column chromatography was performed over Silicycle silica gel (230-400 mesh). <sup>1</sup>H NMR and <sup>13</sup>C NMR spectra were recorded on Varian 400 MHz, 500 MHz, or 600 MHz spectrometers using residue solvent peaks as internal standards (CHCl<sub>3</sub>, <sup>1</sup>H: 7.26 ppm; <sup>13</sup>C: 77.00 ppm. CH<sub>2</sub>Cl<sub>2</sub>, <sup>1</sup>H: 5.32 ppm; <sup>13</sup>C: 53.84 ppm. Acetone, <sup>1</sup>H: 2.05; <sup>13</sup>C: 206.68; DMSO, <sup>1</sup>H: 2.50; <sup>13</sup>C: 39.51). <sup>19</sup>F NMR spectra were recorded on Varian 400 MHz calibrated by trifluoroacetic acid peak (CF<sub>3</sub>COOH, <sup>19</sup>F: -76.55 ppm). Infrared spectra were recorded with a Perkin Elmer FT-IR spectrum 2000 spectrometer and are reported in reciprocal centimeter (cm<sup>-1</sup>). Mass spectra were recorded with HP 5970 GC/MS equipped with J&W DB 5 ms GC column (0.25 μm ID and 0.25 μm film thickness) using electron ionization and Xevo G2-XS QToF Quadrupole Time-of-Flight Mass Spectrometry using electron spray ionization. Chiral columns (IB or IC) were used for monitoring the chiral purities of **3h** or (*R*)-**3h** and their starting materials by using hexanes/IPA = 97 to 3 (v/v) as eluent at 1.0 mL/min. No effort was taken to improve the yields of the substrates.

## 2. Synthesis of compounds 1:

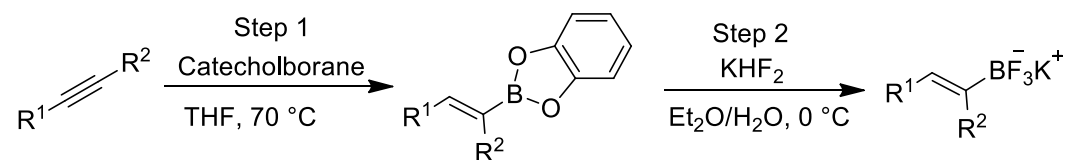

General procedure A: step 1): In a sealed and flame-dried schlenk flask, the alkyne (1.0 equiv.) was heated with catecholborane (1.8 equiv. 1.0 M in THF) at 70 °C in THF overnight. Upon completion, the solvent was removed and the boron ester was obtained and directly used in the next step. Step 2): the boron ester was dissolved in Et<sub>2</sub>O, and KHF<sub>2</sub> (3.5 equiv.) dissolved in H<sub>2</sub>O

(4.5 M) was added dropwise at 0 °C. The reaction was stirred at 0 °C for 3 hrs, and then the precipitation was filtered and washed with Et<sub>2</sub>O twice. The solid was dissolved in hot acetone, and was precipitated after adding Et<sub>2</sub>O slowly. The precipitation was filtered, washed with Et<sub>2</sub>O, and dried under vacuum to get the target substrates as white solids.

Potassium (*E*)-trifluoro(styryl)borate ((*E*)-**1a**):

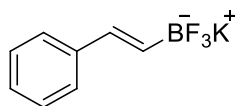

Compound (*E*)-**1a** was obtained according to the general procedure A (step 2) by using the commercially available (*E*)-2-phenylvinylboronic acid as starting material, yield 80%. Its spectral data was consistent with those described in the corresponding reference<sup>[1]</sup>.

Potassium (*E*)-(4-chlorostyryl)trifluoroborate (**1b**):

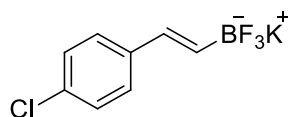

The starting material 1-chloro-4-ethynylbenzene was synthesized by following the known procedure<sup>[2]</sup>, and then compound **1b** was obtained according to the general procedure A, yield 53%. Its spectral data was consistent with those described in the corresponding reference<sup>[3]</sup>.

Potassium (*E*)-(4-bromostyryl)trifluoroborate (**1c**):

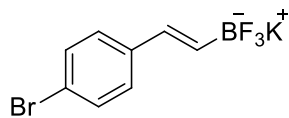

The starting material 1-bromo-4-ethynylbenzene was synthesized by following the known procedure<sup>[4]</sup>, and then compound **1c** was obtained according to the general procedure A, yield 51%. Its spectral data was consistent with those described in the corresponding reference<sup>[5]</sup>.

Potassium (*E*)-trifluoro(4-methoxystyryl)borate (**1d**):

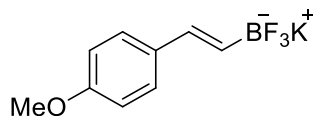

The starting material 1-ethynyl-4-methoxybenzene was synthesized by following the known procedure<sup>[4]</sup>, and then compound **1d** was obtained according to the general procedure A, yield 64%. Its spectral data was consistent with those described in the corresponding reference<sup>[6]</sup>.

Potassium (*E*)-trifluoro(3-(methoxycarbonyl)styryl)borate (**1e**):

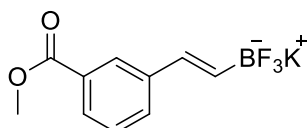

The starting material methyl 3-ethynylbenzoate was synthesized by following the known procedure<sup>[7]</sup>, and then compound **1e** was obtained according to the general procedure A, yield 64%. <sup>1</sup>H NMR (400 MHz, (CD<sub>3</sub>)<sub>2</sub>CO) δ 7.99 (s, 1H), 7.74 (d, *J* = 6.0 Hz, 1H), 7.58 (s, 1H), 7.37 (s, 1H), 6.69 (d, *J* = 18.2 Hz, 1H), 6.45 (d, *J* = 18.4 Hz, 1H), 3.87 (s, 3H). <sup>13</sup>C NMR (126 MHz, (CD<sub>3</sub>)<sub>2</sub>CO) δ 167.90, 142.54, 134.24 (q, *J* = 4.4 Hz, 1H), 131.48, 131.29, 129.57, 127.88, 127.63, 52.56. <sup>19</sup>F NMR (376 MHz, (CD<sub>3</sub>)<sub>2</sub>CO) δ -139.95 (d, *J* = 49.2 Hz). **HRMS(ESI):** *m/z* calcd for C<sub>10</sub>H<sub>9</sub>BF<sub>3</sub>O<sub>2</sub> [M-K]<sup>-</sup>: 229.0653, found: 229.0647. IR (neat): 3012, 2964, 1709, 1633, 1599, 1457, 1924, 1098, 991 cm<sup>-1</sup>.

Potassium (*E*)-trifluoro(2-methylstyryl)borate (**1f**):

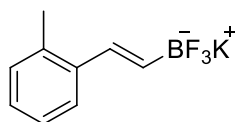

The starting material 1-ethynyl-2-methylbenzene was synthesized by following the known procedure<sup>[8]</sup>, and then compound **1f** was obtained according to the general procedure A, yield 47%. Its spectral data was consistent with those described in the corresponding reference<sup>[9]</sup>.

Potassium (*E*)-trifluoro(2-(thiophen-3-yl)vinyl)borate (**1g**):

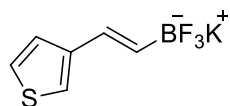

The starting material 3-ethynylthiophene was synthesized by following the known procedure<sup>[10]</sup>, and then compound **1g** was obtained according to the general procedure A, yield 60%. <sup>1</sup>H NMR (400 MHz, (CD<sub>3</sub>)<sub>2</sub>CO) δ 7.28 (dd, *J* = 4.8, 3.0 Hz, 1H), 7.22 (d, *J* = 4.4 Hz, 1H), 7.02 (d, *J* = 2.3 Hz, 1H), 6.66 (d, *J* = 18.2 Hz, 1H), 6.10 (dq, *J* = 18.2, 3.7 Hz, 1H). <sup>13</sup>C NMR (101 MHz, (CD<sub>3</sub>)<sub>2</sub>CO) δ 145.87, 129.50 (q, *J* = 4.7 Hz), 126.54, 126.11, 119.96. <sup>19</sup>F NMR (376 MHz, DMSO-*d*<sub>6</sub>) δ -136.04 (s). **HRMS(ESI)**: *m/z* calcd for C<sub>6</sub>H<sub>5</sub>BF<sub>3</sub>S [M-K]<sup>-</sup>: 117.0163, found: 117.0162. IR (neat): 3102, 3086, 2990, 2964, 1705, 1628, 1466, 1254, 1231, 1103, 973, 922, 839, 774 cm<sup>-1</sup>.

#### Synthesis of potassium (*E*)-trifluoro(3-methylbuta-1,3-dien-1-yl)borate (**1h**)

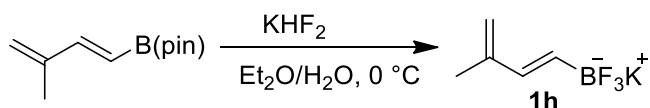

The (*E*)-4,4,5,5-tetramethyl-2-(3-methylbuta-1,3-dien-1-yl)-1,3,2-dioxaborolane was synthesized by following the previous known study<sup>[11]</sup>, and then compound **1h** was obtained according to the general procedure A, step 2, yield 56%. <sup>1</sup>H NMR (400 MHz, (CD<sub>3</sub>)<sub>2</sub>CO) δ 6.42 (d, *J* = 18.1 Hz, 1H), 5.67 (d, *J* = 18.1 Hz, 1H), 4.74 (s, 2H), 1.76 (s, 3H). <sup>13</sup>C NMR (101 MHz, (CD<sub>3</sub>)<sub>2</sub>CO) δ 146.00, 138.31 (q, *J* = 4.6 Hz), 112.66, 19.05. <sup>19</sup>F NMR (376 MHz, (CD<sub>3</sub>)<sub>2</sub>CO) δ -139.46 (q, *J* = 45.8 Hz). **HRMS(ESI)**: *m/z* calcd for C<sub>5</sub>H<sub>7</sub>BF<sub>3</sub> [M-K]<sup>-</sup>: 135.0598, found: 135.0602. IR (neat): 3081, 2988, 2947, 1709, 1628, 1599, 1434, 1368, 1236, 1105, 990, 962 cm<sup>-1</sup>.

#### Synthesis of potassium potassium cyclo-en-1-yltrifluoroborate (**1i-k**)

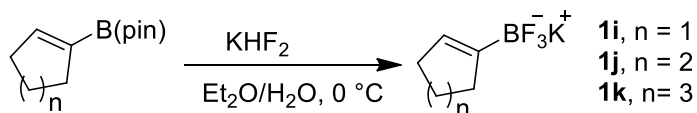

Potassium cyclopent-1-en-1-yltrifluoroborate (**1i**):

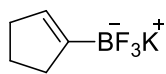

Compound **1i** was obtained according to the general procedure A (step 2) by using the commercially available 2-(cyclopent-1-en-1-yl)-4,4,5,5-tetramethyl-1,3,2-dioxaborolane as the starting material, yield 72%.  $^1\text{H}$  NMR (500 MHz, DMSO- $d_6$ )  $\delta$  5.31 (s, 1H), 2.12 (t,  $J$  = 7.3 Hz, 4H), 1.67 – 1.53 (m, 2H).  $^{13}\text{C}$  NMR (126 MHz, DMSO- $d_6$ )  $\delta$  126.41 – 126.30 (m), 35.53, 33.52, 23.77.  $^{19}\text{F}$  NMR (376 MHz,  $(\text{CD}_3)_2\text{CO}$ )  $\delta$  -140.29 (q,  $J$  = 52.0 Hz). **HRMS(ESI)**:  $m/z$  calcd for  $\text{C}_5\text{H}_7\text{BF}_3$   $[\text{M-K}]^-$ : 135.0598, found: 135.0602. IR (neat): 3040, 2949, 2843, 1644, 1621, 1423, 1366, 1231, 983, 917, 842  $\text{cm}^{-1}$ .

Potassium cyclohex-1-en-1-yltrifluoroborate (**1j**):

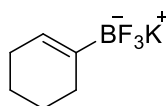

The 2-(cyclohex-1-en-1-yl)-4,4,5,5-tetramethyl-1,3,2-dioxaborolane was synthesized by following the known procedure<sup>[12]</sup>, and then compound **1j** was obtained according to the procedure A (step 2), yield 42%. Its spectral data was consistent with those described in the corresponding reference<sup>[13]</sup>.

Potassium cyclohept-1-en-1-yltrifluoroborate (**1k**):

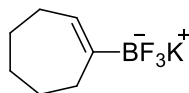

The 2-(cyclohept-1-en-1-yl)-4,4,5,5-tetramethyl-1,3,2-dioxaborolane was synthesized by following the known procedure<sup>[12]</sup>, and then compound **1k** was obtained according to the general procedure A (step 2), yield 42%.  $^1\text{H}$  NMR (400 MHz,  $(\text{CD}_3)_2\text{CO}$ )  $\delta$  5.87 (t,  $J$  = 6.1 Hz, 1H), 2.13 – 2.09 (m, 2H), 2.05 – 2.00 (m, 2H), 1.72 – 1.65 (m, 2H), 1.43 – 1.35 (m, 4H).  $^{13}\text{C}$  NMR (101 MHz,  $(\text{CD}_3)_2\text{CO}$ ) 130.35, 34.82, 31.57, 31.55, 30.79, 29.10.  $^{19}\text{F}$  NMR (376 MHz, DMSO- $d_6$ )  $\delta$  -141.17 (s). **HRMS(ESI)**:  $m/z$  calcd for  $\text{C}_7\text{H}_{11}\text{BF}_3$   $[\text{M-K}]^-$ : 163.0911, found: 163.0919. IR (neat): 3010, 2908, 2941, 1640, 1604, 1447, 971, 955, 893, 855, 806  $\text{cm}^{-1}$ .

Potassium (*Z*)-dec-2-en-2-yltrifluoroborate (**1l**):

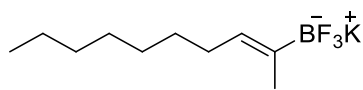

Compound **1l** was obtained according to the general procedure A by using the commercially available 2-decyne as starting material, yield 75%. <sup>1</sup>H NMR (500 MHz, (CD<sub>3</sub>)<sub>2</sub>CO) δ 5.46 (s, 1H), 1.94 (d, *J* = 5.9 Hz, 2H), 1.50 (s, 3H), 1.30 (s, 10H), 0.88 (t, *J* = 6.9 Hz, 3H). <sup>13</sup>C NMR (101 MHz, (CD<sub>3</sub>)<sub>2</sub>CO) δ 128.52, 33.23, 31.54, 30.89, 30.67, 28.99, 23.88, 15.27, 14.88. <sup>19</sup>F NMR (376 MHz, (CD<sub>3</sub>)<sub>2</sub>CO) δ -143.87 (d, *J* = 56.9 Hz). **HRMS(ESI):** *m/z* calcd for C<sub>10</sub>H<sub>19</sub>BF<sub>3</sub> [M-K]<sup>-</sup>: 207.1537, found: 207.1530. IR (neat): 2957, 2923, 2855, 1710, 1641, 1467, 1365, 1229, 948, 752 cm<sup>-1</sup>.

Potassium (*E*)-trifluoro(pent-1-en-1-yl)borate (**1m**):

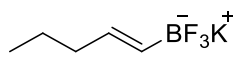

Compound **1m** was synthesized according to the general procedure A (step 2) by using the commercially available (*E*)-penten-1-ylboronic acid as starting material, yield 45%. Its spectral data was consistent with those described in the corresponding reference<sup>[6]</sup>.

Potassium (*E*)-trifluoro(oct-1-en-1-yl)borate (**1n**):

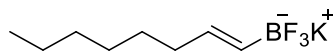

Compound **1n** was obtained according to the general procedure A by using the commercially available 1-octyne as starting material, yield 65%. Its spectral data was consistent with those described in the corresponding reference<sup>[13]</sup>.

Potassium (*E*)-trifluoro(7-methoxy-7-oxohept-1-en-1-yl)borate (**1o**):

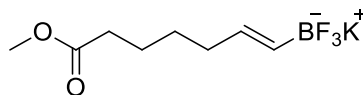

Compound **1o** was obtained according to the general procedure A by using the commercially available methyl 6-heptynoate, yield 41%. <sup>1</sup>H NMR (400 MHz, (CD<sub>3</sub>)<sub>2</sub>CO) δ 5.70 (dt, *J* = 17.0, 6.1 Hz, 1H), 5.38 (dd, *J* = 17.6, 3.7 Hz, 1H), 3.62 (s, 3H), 2.29 (t, *J* = 7.5 Hz,

2H), 1.97 (dd,  $J = 13.8, 7.2$  Hz, 2H), 1.59 (dt,  $J = 15.3, 7.5$  Hz, 2H), 1.36 (dq,  $J = 15.0, 7.6$  Hz, 2H).  $^{13}\text{C}$  NMR (101 MHz,  $(\text{CD}_3)_2\text{CO}$ )  $\delta$  174.69, 135.95 (q,  $J = 4.8$  Hz), 51.85, 36.53, 34.75, 30.18, 25.77.  $^{19}\text{F}$  NMR (376 MHz,  $(\text{CD}_3)_2\text{CO}$ )  $\delta$  -138.98 (s). **HRMS(ESI)**:  $m/z$  calcd for  $\text{C}_8\text{H}_{13}\text{BF}_3\text{O}_2$   $[\text{M-K}]^-$ : 209.0966, found: 209.0971. IR (neat): 2990, 2949, 2856, 1745, 1644, 1467, 1230, 1166, 946, 924  $\text{cm}^{-1}$ .

Potassium (*E*)-(2-cyclopropylvinyl)trifluoroborate (**1p**):

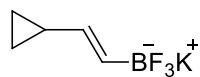

Compound **1p** was obtained according to the general procedure A by using the commercially available ethynylcyclopropane, yield 69%. Its spectral data was consistent with those described in the corresponding reference<sup>[14]</sup>.

### 3. Synthesis of compounds 2.

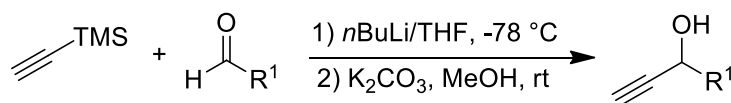

General procedure B: In a flame-dried Schlenk flask backfilled with  $\text{N}_2$ , trimethylsilylacetylene (1.1 equiv.) dissolved in THF was added and the mixture was cooled to  $-78$  °C.  $n\text{BuLi}$  (1.2 equiv. 2.5 M in hexaness) was added dropwise and the reaction was stirred for 30 min. After aldehyde (1.0 equiv.) was added dropwise, the reaction was elevated to room temperature slowly and stirred for another 3 hrs. Upon completion, the reaction was quenched using saturated  $\text{NH}_4\text{Cl}$ . The solvent was removed and the residue was extracted using EA, and washed with  $\text{H}_2\text{O}$  for three times. The EA layer was combined, dried, and concentrated. The residue was treated with  $\text{K}_2\text{CO}_3$  (3.0 equiv.) in methanol overnight. After the reaction was completed, the solvent was removed, and the residue was dissolved in EA, washed with  $\text{H}_2\text{O}$  three times. The solvent was removed and the residue was purified by silica gel chromatography (hexanes/EA = 20:1 to 5 :1) to afford the propargylic alcohols.



1-Cyclohexylprop-2-yn-1-ol (**2a**):

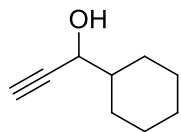

Compound **2a** was obtained according to the general procedure B by using the commercially available cyclohexanecarbaldehyde and ethynyltrimethylsilane as starting materials. Colorless oil, yield 78%,  $R_f = 0.80$  (hexanes/EA = 4:1). Its spectral data was consistent with those described in the corresponding reference<sup>[15]</sup>.

1-Phenylprop-2-yn-1-ol (**2b**):

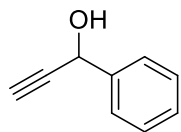

Compound **2b** was obtained according to the general procedure B by using commercially available benzaldehyde and ethynyltrimethylsilane as starting materials. Slight yellow oil, yield 83%,  $R_f = 0.2$  (hexanes/EA = 8:1). Its spectral data was consistent with those described in the corresponding reference<sup>[16]</sup>.

1-(Benzyloxy)but-3-yn-2-ol (**2c**):

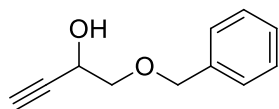

The 2-(benzyloxy)acetaldehyde was obtained by following the known procedure<sup>[17]</sup>, and then compound **2c** was obtained according to the general procedure B. Slight yellow oil, yield 70%,  $R_f = 0.5$  (hexanes/EA = 5:1). Its spectral data was consistent with those described in the corresponding reference.<sup>[18]</sup>

6-((*tert*-Butyldimethylsilyl)oxy)hex-1-yn-3-ol (**2d**):

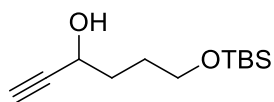

4-((*tert*-Butyldimethylsilyl)oxy)butanal was obtained by following the known procedure<sup>[19]</sup>, and then compound **2d** was obtained according to the general procedure B. colorless oil, yield 72%.  $R_f = 0.38$  (hexanes/EA = 5:1).  $^1\text{H NMR}$  (400 MHz,  $\text{CDCl}_3$ )  $\delta$  4.39 (d,  $J = 3.7$  Hz, 1H), 3.71 – 3.56 (m, 2H), 2.40 (d,  $J = 1.9$  Hz, 1H), 1.83 – 1.61 (m, 4H), 0.87 (s, 9H), 0.04 (s, 6H).  $^{13}\text{C NMR}$  (101 MHz,  $\text{CDCl}_3$ )  $\delta$  84.95, 72.46, 63.04, 61.66, 34.99, 28.27, 25.83, 18.21, -5.46, -5.49. **HRMS(ED)**:  $m/z$  calcd for  $\text{C}_8\text{H}_{15}\text{O}_2\text{Si}$  [ $M-t\text{Bu}$ ] $^+$ : 171.0841, found: 171.0842. IR (neat): 3351, 3312, 2956, 2930, 2859, 2130, 1472, 1464, 1256, 1098, 836, 776  $\text{cm}^{-1}$ .

2-(4-Hydroxyhex-5-yn-1-yl)isoindoline-1,3-dione (**2e**):

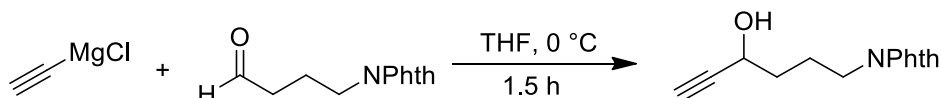

The 4-(1,3-dioxoisoindolin-2-yl)butanal was obtained by following the known procedure<sup>[20]</sup>.

In a flame-dried Schlenk flask backfilled with  $\text{N}_2$ , ethynyl magnesium chloride (1.3 equiv., 0.6 M in THF/toluene) in THF was added and the flask was cooled to 0 °C, and then aldehyde (1.0 equiv.) dissolved in THF was added dropwise at 0 °C. The reaction was stirred at the same temperature for another 2 h. The reaction was quenched using saturated  $\text{NH}_4\text{Cl}$  and the solvent was removed. The residue was dissolved in DCM, washed with  $\text{H}_2\text{O}$  three times. The organic layer was dried and removed under the reduced pressure. The residue was purified by silica gel chromatography (hexanes/EA = 20:1 to 2:1) to afford the target compound as white solid with a yield of 57%.  $R_f = 0.38$  (hexanes/EA = 1:1).  $^1\text{H NMR}$  (400 MHz,  $\text{CDCl}_3$ )  $\delta$  7.84 – 7.79 (m, 2H), 7.72 – 7.67 (m, 2H), 4.43 (s, 1H), 3.73 (t,  $J = 6.9$  Hz, 2H), 2.53 (s, 1H), 2.44 (d,  $J = 1.9$  Hz, 1H), 1.95 – 1.80 (m, 2H), 1.80 – 1.69 (m, 2H).  $^{13}\text{C NMR}$  (101 MHz,  $\text{CDCl}_3$ )  $\delta$  168.43, 133.91, 131.94, 123.19, 84.40, 73.18, 61.60, 37.46, 34.52, 24.27. **HRMS(ESI)**:  $m/z$  calcd for  $\text{C}_{14}\text{H}_{13}\text{NO}_3\text{Na}$  [ $M+\text{Na}$ ] $^+$ : 266.0788, found: 266.0797. IR (neat): 3360, 3257, 3031, 2956, 2935, 2864, 2112, 1767, 1704, 1612, 1469, 1435, 1402, 1046, 1028, 874, 721  $\text{cm}^{-1}$ .

#### 4. General procedure C: cross-coupling between potassium *E*-vinyltrifluoroborate salt and propargylic alcohols.

In a 10 mL vial, propargylic alcohols (0.3 mmol, 1.0 equiv.), potassium *E*-vinyltrifluoroborate salt (0.9 or 1.8 mmol, 3.0 or 6.0 equiv.), and gold catalyst (0.05 or 0.08 equiv.) were added successively. After the mixture was dissolved in DCM (1.5 mL) and H<sub>2</sub>O (0.38 mL), AgNTf<sub>2</sub> (0.048 or 0.078 equiv.) was added and the reaction was stirred at room temperature for 24 h. The reaction was washed with 15% NaOH (2 mL) and H<sub>2</sub>O (30 mL × 2) respectively. The organic layer was combined, dried, and removed. The residue was purified with silica gel chromatography (hexanes/EA = 30:1 – 2:1) to afford the target compounds as colorless oils or white solids.

##### (*E*)-3-Methylene-1-phenylhept-1-en-4-ol (**3a**)

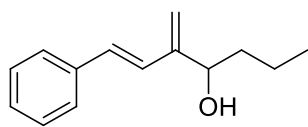

Following the general procedure C, the target compound **3a** was obtained as a colorless oil in 71% yield.  $R_f = 0.43$  (hexanes/EA = 5:1). <sup>1</sup>H NMR (500 MHz, CDCl<sub>3</sub>)  $\delta$  7.43 (d,  $J = 7.4$  Hz, 2H), 7.33 (t,  $J = 7.6$  Hz, 2H), 7.24 (t,  $J = 7.6$  Hz, 1H), 6.78 (d,  $J = 16.5$  Hz, 1H), 6.74 (d,  $J = 16.5$  Hz, 1H), 5.29 (s, 1H), 5.28 (s, 1H), 4.53 (dt,  $J = 7.7, 3.9$  Hz, 1H), 1.78 – 1.58 (m, 3H), 1.57 – 1.35 (m, 2H), 0.96 (t,  $J = 7.4$  Hz, 3H). <sup>13</sup>C NMR (126 MHz, CDCl<sub>3</sub>)  $\delta$  149.00, 137.17, 128.93, 128.62, 127.93, 127.64, 126.44, 114.08, 72.07, 38.63, 19.06, 14.00. **HRMS(ESI)**:  $m/z$  calcd for C<sub>14</sub>H<sub>18</sub>O [M]<sup>+</sup>: 202.1358, found: 202.1361. IR (neat): 3303, 3028, 2958, 2933, 2872, 1602, 1494, 1449, 1378, 1068, 959, 895, 754 cm<sup>-1</sup>.

##### (*E*)-2-Methylene-4-phenylbut-3-en-1-ol (**3b**)

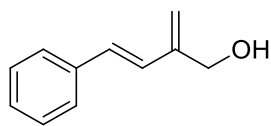

Following the general procedure C, the target compound **3b** was obtained as a colorless oil in 81% yield.  $R_f = 0.21$  (hexanes/EA = 5:1). <sup>1</sup>H NMR (500 MHz, CDCl<sub>3</sub>)  $\delta$  7.43 (d,  $J = 7.4$  Hz, 2H), 7.33 (t,  $J = 7.6$  Hz, 2H), 7.25 (t,  $J = 7.6$  Hz, 1H), 6.82 (d,  $J = 16.6$  Hz, 1H), 6.67

(d,  $J = 16.6$  Hz, 1H), 5.35 (s, 1H), 5.28 (s, 1H), 4.46 (d,  $J = 4.7$  Hz, 2H), 1.53 (s, 1H).  $^{13}\text{C}$  NMR (126 MHz,  $\text{CDCl}_3$ )  $\delta$  145.04, 137.01, 128.83, 128.62, 128.14, 127.71, 126.45, 116.19, 63.23. **HRMS(EI)**:  $m/z$  calcd for  $\text{C}_{11}\text{H}_{12}\text{O}$   $[\text{M}]^+$ : 160.0888, found: 160.0888. IR (neat): 3224, 3026, 2853, 1605, 1449, 1195, 1071, 964, 901, 753  $\text{cm}^{-1}$ .

(*E*)-3-Methylene-5-phenylpent-4-en-2-ol (**3c**)

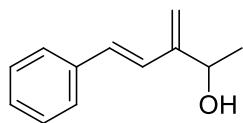

Following the general procedure C, the target compound **3c** was obtained as a colorless oil in 75% yield.  $R_f = 0.27$  (hexanes/EA = 5:1).  $^1\text{H}$  NMR (500 MHz,  $\text{CDCl}_3$ )  $\delta$  7.43 (d,  $J = 7.4$  Hz, 2H), 7.33 (t,  $J = 7.6$  Hz, 2H), 7.24 (t,  $J = 7.4$  Hz, 1H), 6.79 (d,  $J = 16.6$  Hz, 1H), 6.73 (d,  $J = 16.6$  Hz, 1H), 5.34 (s, 1H), 5.25 (s, 1H), 4.77 – 4.70 (m, 1H), 1.64 (s, 1H), 1.45 (d,  $J = 6.4$  Hz, 3H).  $^{13}\text{C}$  NMR (126 MHz,  $\text{CDCl}_3$ )  $\delta$  150.05, 137.13, 128.91, 128.62, 128.03, 127.66, 126.43, 113.49, 67.78, 22.97. **HRMS(EI)**:  $m/z$  calcd for  $\text{C}_{12}\text{H}_{14}\text{O}$   $[\text{M}]^+$ : 174.1045, found: 174.1053. IR (neat): 3357, 3028, 2925, 2854, 1602, 1495, 1449, 1285, 1073, 964, 855, 753  $\text{cm}^{-1}$ .

(*E*)-1-Cyclohexyl-2-methylene-4-phenylbut-3-en-1-ol (**3d**)

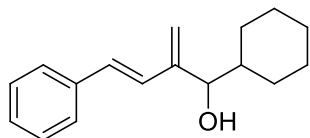

Following the general procedure C, the target compound **3d** was obtained as a colorless oil in 61%.  $R_f = 0.45$  (hexanes/EA = 5:1).  $^1\text{H}$  NMR (500 MHz,  $\text{CDCl}_3$ )  $\delta$  7.44 (d,  $J = 7.6$  Hz, 2H), 7.34 (t,  $J = 7.7$  Hz, 2H), 7.25 (t,  $J = 7.2$  Hz, 1H), 6.80 (d,  $J = 16.5$  Hz, 1H), 6.76 (d,  $J = 16.5$  Hz, 1H), 5.33 (s, 1H), 5.20 (s, 1H), 4.21 (d,  $J = 6.0$  Hz, 1H), 1.96 (d,  $J = 12.7$  Hz, 1H), 1.77 – 1.59 (m, 6H), 1.28 – 1.10 (m, 5H).  $^{13}\text{C}$  NMR (101 MHz,  $\text{CDCl}_3$ )  $\delta$  147.61, 137.20, 129.11, 128.57, 127.82, 127.57, 126.43, 114.91, 77.61, 41.88, 29.93, 27.97, 26.41, 26.26, 26.02. **HRMS(EI)**:  $m/z$  calcd for  $\text{C}_{17}\text{H}_{23}\text{O}$   $[\text{M}+\text{H}]^+$ : 243.1749, found: 243.1748. IR (neat): 3392, 3027, 2925, 2852, 1637, 1493, 1450, 1265, 1027, 890, 755  $\text{cm}^{-1}$ .

(*E*)-1-(Benzyloxy)-3-methylene-5-phenylpent-4-en-2-ol (**3e**)

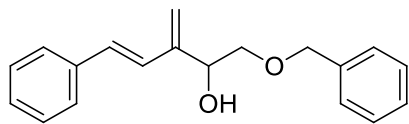

Following the general procedure C, the target compound **3e** was obtained as a white solid in 78% yield.  $R_f = 0.29$  (hexanes/EA = 5:1).  $^1\text{H NMR}$  (400 MHz,  $\text{CDCl}_3$ )  $\delta$  7.42 – 7.35 (m, 5H), 7.32 (t,  $J = 7.5$  Hz, 3H), 7.26 – 7.22 (m, 2H), 6.77 (d,  $J = 16.6$  Hz, 1H), 6.65 (d,  $J = 16.6$  Hz, 1H), 5.45 (s, 1H), 5.36 (s, 1H), 4.81 (d,  $J = 8.5$  Hz, 1H), 4.68 – 4.55 (m, 2H), 3.75 (dd,  $J = 9.9, 2.8$  Hz, 1H), 3.47 (dd,  $J = 9.8, 8.6$  Hz, 1H), 2.62 (d,  $J = 2.7$  Hz, 1H).  $^{13}\text{C NMR}$  (151 MHz,  $\text{CDCl}_3$ )  $\delta$  144.49, 137.79, 136.99, 128.60, 128.54, 128.50, 128.14, 127.87, 127.79, 127.69, 126.42, 116.04, 74.34, 73.39, 70.47. **HRMS(EI)**:  $m/z$  calcd for  $\text{C}_{19}\text{H}_{20}\text{O}_2$   $[\text{M}]^+$ : 280.1463, found: 280.1476. IR (neat): 3418, 3071, 3051, 3029, 2918, 2862, 1603, 1495, 1451, 1363, 1103, 964, 908, 754  $\text{cm}^{-1}$ .

(*E*)-7-((*tert*-Butyldimethylsilyl)oxy)-3-methylene-1-phenylhept-1-en-4-ol (**3f**)

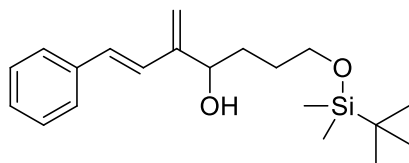

Following the general procedure C, the target compound **3f** was obtained as a colorless oil in 65%.  $R_f = 0.42$  (hexanes/EA = 5:1).  $^1\text{H NMR}$  (400 MHz,  $\text{CDCl}_3$ )  $\delta$  7.42 (d,  $J = 7.5$  Hz, 2H), 7.32 (t,  $J = 7.6$  Hz, 2H), 7.23 (t,  $J = 7.3$  Hz, 1H), 6.78 (d,  $J = 16.5$  Hz, 1H), 6.71 (d,  $J = 16.5$  Hz, 1H), 5.35 (s, 1H), 5.29 (s, 1H), 4.60 – 4.52 (m, 1H), 3.70 (t,  $J = 5.6$  Hz, 1H), 3.01 (s, 1H), 1.97 – 1.87 (m, 1H), 1.76 – 1.65 (m, 3H), 0.92 (s, 9H), 0.09 (s, 6H).  $^{13}\text{C NMR}$  (101 MHz,  $\text{CDCl}_3$ )  $\delta$  148.74, 137.25, 128.60, 128.55, 128.26, 127.50, 126.39, 114.29, 71.68, 63.44, 33.98, 29.13, 25.92, 18.31, -5.37. **HRMS(EI)**:  $m/z$  calcd for  $\text{C}_{20}\text{H}_{33}\text{O}_2\text{Si}$   $[\text{M}+\text{H}]^+$ : 333.2250, found: 333.2263. IR (neat): 3392, 3029, 2954, 2929, 2885, 2857, 1639, 1472, 1463, 1389, 1256, 1097, 836, 776  $\text{cm}^{-1}$ .

(*E*)-2-(4-Hydroxy-5-methylene-7-phenylhept-6-en-1-yl)isoindoline-1,3-dione (**3g**)

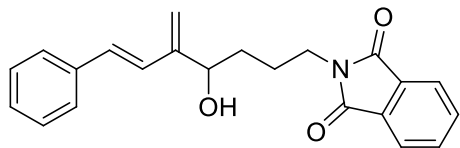

Following the general procedure C, the target compound **3g**

was obtained as a white solid in 77% yield.  $R_f = 0.53$  (hexanes/EA = 1:1).  $^1\text{H NMR}$  (400 MHz,  $\text{CDCl}_3$ )  $\delta$  7.86 – 7.74 (m, 2H), 7.72 – 7.63 (m, 2H), 7.38 (d,  $J = 7.3$  Hz, 2H), 7.30 (t,  $J = 7.5$  Hz, 2H), 7.22 (t,  $J = 7.2$  Hz, 1H), 6.73 (d,  $J = 16.8$  Hz, 1H), 6.69 (d,  $J = 16.9$  Hz, 1H), 5.29 (s, 1H), 5.27 (s, 1H), 4.58 (d,  $J = 6.9$  Hz, 1H), 3.75 (t,  $J = 6.9$  Hz, 2H), 2.00 (s, 1H), 1.92 – 1.63 (m, 4H).  $^{13}\text{C NMR}$  (101 MHz,  $\text{CDCl}_3$ )  $\delta$  168.45, 148.41, 137.00, 133.81, 132.00, 129.00, 128.53, 127.61, 127.59, 126.41, 123.12, 114.43, 71.62, 37.75, 33.10, 24.81. **HRMS(EI)**:  $m/z$  calcd for  $\text{C}_{22}\text{H}_{22}\text{NO}_3[\text{M}+\text{H}]^+$ : 348.1600, found: 348.1608. IR (neat): 3457, 3027, 2931, 2850, 1770, 1708, 1614, 1494, 1467, 1438, 1398, 1371, 1043, 966, 897, 720  $\text{cm}^{-1}$ .

(*E*)-4-(4-Bromophenyl)-2-methylene-1-phenylbut-3-en-1-ol (**3h**)

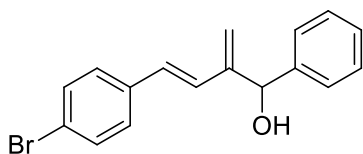

Following the general procedure C, the target compound **3h** was

obtained as a white solid in 79% yield.  $R_f = 0.35$  (hexanes/EA = 5:1).  $^1\text{H NMR}$  (500 MHz,  $\text{CDCl}_3$ )  $\delta$  7.46 – 7.43 (m, 2H), 7.41 – 7.35 (m, 4H), 7.32 – 7.28 (m, 1H), 7.20 – 7.16 (m, 2H), 6.71 (d,  $J = 16.5$  Hz, 1H), 6.55 (d,  $J = 16.5$  Hz, 1H), 5.57 (d,  $J = 3.7$  Hz, 1H), 5.48 (s, 2H), 2.02 (d,  $J = 4.0$  Hz, 1H).  $^{13}\text{C NMR}$  (126 MHz,  $\text{CDCl}_3$ )  $\delta$  147.16, 141.80, 135.99, 131.63, 128.82, 128.61, 128.33, 127.96, 127.90, 126.82, 121.39, 116.60, 74.43. **HRMS(EI)**:  $m/z$  calcd for  $\text{C}_{17}\text{H}_{16}\text{BrO}[\text{M}+\text{H}]^+$ : 315.0385, found: 315.0385. IR (neat): 3384, 3032, 2918, 2850, 1602, 1487, 1453, 1038, 953, 861, 805, 757  $\text{cm}^{-1}$ .

(*E*)-5-(4-Bromophenyl)-3-methylenepent-4-en-2-ol (**3i**)

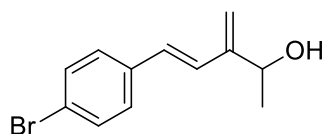

Following the general procedure C, the target compound **3i** was obtained as a white solid in 75% yield.  $R_f = 0.21$  (hexanes/EA = 5:1).  $^1\text{H NMR}$  (500 MHz,  $\text{CDCl}_3$ )  $\delta$  7.44 (d,  $J = 8.5$  Hz, 2H), 7.28 (d,  $J = 8.4$  Hz, 2H), 6.76 (d,  $J = 16.5$  Hz, 1H), 6.66 (d,  $J = 16.5$  Hz, 1H), 5.37 (s, 1H), 5.26 (s, 1H), 4.70 (q,  $J = 6.4$  Hz, 1H), 1.81 (s, 1H), 1.44 (d,  $J = 6.5$  Hz, 3H).  $^{13}\text{C NMR}$  (126 MHz,  $\text{CDCl}_3$ )  $\delta$  149.73, 136.07, 131.68, 128.70, 127.86, 127.67, 121.34, 114.15, 67.70, 22.94. **HRMS(EI)**:  $m/z$  calcd for  $\text{C}_{12}\text{H}_{14}\text{BrO}$   $[\text{M}+\text{H}]^+$ : 253.0228, found: 253.0217. IR (neat): 3375, 2972, 2925, 2855, 1700, 1612, 1588, 1488, 1402, 1072, 1010, 813  $\text{cm}^{-1}$ .

(*E*)-1-(4-Chlorophenyl)-3-methylenehept-1-en-4-ol (**3j**)

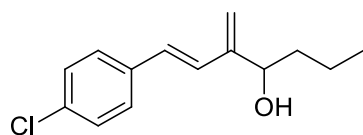

Following the general procedure C, the target compound **3j** was obtained as a slight yellow oil in 64% yield.  $R_f = 0.35$  (hexanes/EA = 5:1).  $^1\text{H NMR}$  (500 MHz,  $\text{CDCl}_3$ )  $\delta$  7.35 (d,  $J = 8.5$  Hz, 2H), 7.29 (d,  $J = 8.5$  Hz, 2H), 6.73 (d,  $J = 16.5$  Hz, 1H), 6.69 (d,  $J = 16.5$  Hz, 1H), 5.30 (s, 1H), 5.28 (s, 1H), 4.50 (s, 1H), 1.75 – 1.59 (m, 3H), 1.56 – 1.36 (m, 2H), 0.96 (t,  $J = 7.4$  Hz, 3H).  $^{13}\text{C NMR}$  (126 MHz,  $\text{CDCl}_3$ )  $\delta$  148.74, 135.70, 133.20, 128.76, 128.51, 127.69, 127.59, 114.63, 72.10, 38.58, 19.05, 13.97. **HRMS(EI)**:  $m/z$  calcd for  $\text{C}_{14}\text{H}_{18}\text{ClO}$   $[\text{M}+\text{H}]^+$ : 237.1046, found: 237.1051. IR (neat): 3388, 3030, 2960, 2929, 2873, 1706, 1611, 1593, 1491, 1465, 1096, 972, 814  $\text{cm}^{-1}$ .

(*E*)-4-(4-Methoxyphenyl)-2-methylenebut-3-en-1-ol (**3k**)

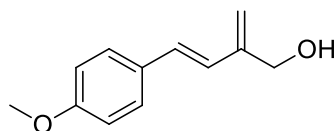

Following the general procedure C, the target compound **3k** was obtained as a white solid in 76% yield.  $R_f = 0.11$  (hexanes/EA = 5:1).  $^1\text{H NMR}$  (500 MHz,  $\text{CDCl}_3$ )  $\delta$  7.36 (d,  $J = 8.6$  Hz, 2H), 6.86 (d,  $J = 8.7$  Hz, 2H), 6.69 (d,  $J = 16.5$  Hz, 1H), 6.62 (d,  $J = 16.6$  Hz, 1H), 5.29 (s, 1H), 5.23 (s, 1H), 4.44 (s, 2H), 3.80 (d,  $J = 10.9$  Hz, 3H), 1.60 (d,  $J = 14.3$  Hz,

1H).  $^{13}\text{C}$  NMR (101 MHz,  $\text{CDCl}_3$ )  $\delta$  159.29, 145.14, 129.74, 128.28, 127.64, 126.08, 115.19, 114.04, 63.26, 55. **HRMS(EI)**:  $m/z$  calcd for  $\text{C}_{13}\text{H}_{15}\text{O}_2[\text{M}+\text{H}]^+$ : 191.1072, found: 191.1073. IR (neat): 3235, 2956, 2912, 2884, 2840, 1603, 1514, 1462, 1452, 1248, 1031, 956,  $862\text{ cm}^{-1}$ .

(*E*)-Methyl 3-(3-(hydroxymethyl)buta-1,3-dien-1-yl)benzoate (**3l**)

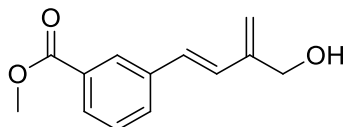

Following the general procedure C, the target compound **3l** was obtained as a white solid in 59% yield.  $R_f$  = 0.10 (hexanes/EA = 5:1).  $^1\text{H}$  NMR (400 MHz,  $\text{CDCl}_3$ )  $\delta$  8.10 (s, 1H), 7.90 (d,  $J$  = 7.7 Hz, 1H), 7.59 (d,  $J$  = 7.8 Hz, 1H), 7.39 (t,  $J$  = 7.7 Hz, 1H), 6.88 (d,  $J$  = 16.6 Hz, 1H), 6.69 (d,  $J$  = 16.6 Hz, 1H), 5.39 (s, 1H), 5.32 (s, 1H), 4.46 (s, 2H), 3.97 – 3.90 (m, 3H).  $^{13}\text{C}$  NMR (101 MHz,  $\text{CDCl}_3$ )  $\delta$  166.98, 144.75, 137.38, 130.78, 130.52, 129.34, 128.68, 128.60, 127.75, 127.40, 117.07, 63.12, 52.19. **HRMS(EI)**:  $m/z$  calcd for  $\text{C}_{13}\text{H}_{14}\text{O}_3[\text{M}]^+$ : 218.0943, found: 218.0941. IR (neat): 3375, 3032, 2953, 2925, 2854, 1721, 1604, 1586, 1444, 1291, 977,  $752\text{ cm}^{-1}$ .

(*E*)-2-Methylene-4-(*o*-tolyl)but-3-en-1-ol (**3m**)

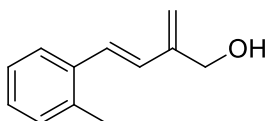

Following the general procedure C, the target compound **3m** was obtained as a colorless oil in 66% yield.  $R_f$  = 0.27 (hexanes/EA = 5:1).  $^1\text{H}$  NMR (500 MHz,  $\text{CDCl}_3$ )  $\delta$  7.52 – 7.49 (m, 1H), 7.22 – 7.13 (m, 3H), 6.90 (d,  $J$  = 16.4 Hz, 1H), 6.71 (d,  $J$  = 16.4 Hz, 1H), 5.36 (s, 1H), 5.29 (s, 1H), 4.48 (d,  $J$  = 4.3 Hz, 2H), 2.38 (s, 3H), 1.75 (t,  $J$  = 4.9 Hz, 1H).  $^{13}\text{C}$  NMR (126 MHz,  $\text{CDCl}_3$ )  $\delta$  145.30, 136.08, 135.72, 130.31, 129.39, 127.57, 126.54, 126.10, 125.15, 115.93, 63.20, 19.74. **HRMS(EI)**:  $m/z$  calcd for  $\text{C}_{12}\text{H}_{14}\text{O}[\text{M}]^+$ : 174.1045, found: 174.1041. IR (neat): 3332, 3056, 3020, 2925, 2858, 1631, 1600, 1484, 1461, 1061, 963, 890,  $753\text{ cm}^{-1}$ .

(*E*)-2-Methylene-4-(thiophen-3-yl)but-3-en-1-ol (**3n**)



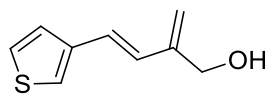

Following the general procedure C, the target compound **3n** was obtained as a white solid in 59% yield.  $R_f = 0.17$  (hexanes/EA = 5:1).  $^1\text{H NMR}$  (400 MHz,  $\text{CDCl}_3$ )  $\delta$  7.28 (dt,  $J = 10.4, 3.7$  Hz, 2H), 7.22 – 7.19 (m, 1H), 6.70 (d,  $J = 16.6$  Hz, 1H), 6.65 (d,  $J = 16.6$  Hz, 1H), 5.31 (s, 1H), 5.24 (s, 1H), 4.42 (s, 2H), 1.68 (s, 1H).  $^{13}\text{C NMR}$  (101 MHz,  $\text{CDCl}_3$ )  $\delta$  144.97, 139.79, 128.10, 126.14, 124.68, 123.10, 122.54, 115.72, 63.16. **HRMS(EI)**:  $m/z$  calcd for  $\text{C}_9\text{H}_{11}\text{SO}$   $[\text{M}+\text{H}]^+$ : 167.0531, found: 167.0526. IR (neat): 3243, 3098, 2924, 2888, 1631, 1461, 1415, 1241, 1074, 960, 776  $\text{cm}^{-1}$ .

(*E*)-4-Cyclopropyl-2-methylenebut-3-en-1-ol (**3o**)

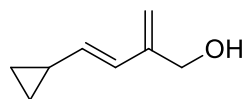

Following the general procedure C, the target compound **3o** was obtained as a white solid in 50% yield.  $R_f = 0.30$  (hexanes/EA = 5:1).  $^1\text{H NMR}$  (400 MHz,  $\text{CDCl}_3$ )  $\delta$  6.16 (d,  $J = 16.0$  Hz, 1H), 5.30 (dd,  $J = 16.0, 8.9$  Hz, 1H), 5.07 (s, 1H), 4.99 (s, 1H), 4.26 (s, 2H), 1.64 (s, 1H), 1.48 – 1.36 (m, 1H), 0.81 – 0.72 (m, 2H), 0.48 – 0.39 (m, 2H).  $^{13}\text{C NMR}$  (101 MHz,  $\text{CDCl}_3$ )  $\delta$  144.87, 135.05, 126.94, 112.51, 63.32, 14.41, 7.25. **HRMS(EI)**:  $m/z$  calcd for  $\text{C}_8\text{H}_{12}\text{O}$   $[\text{M}]^+$ : 124.0888, found: 124.0888. IR (neat): 3397, 3087, 3007, 2932, 2880, 1640, 1431, 1293, 1022, 977  $\text{cm}^{-1}$ .

(*E*)-5-Methyl-2-methylenehexa-3,5-dien-1-ol (**3p**)

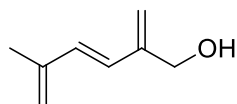

Following the general procedure C, the target compound **3p** was obtained as a white solid in 55% yield.  $R_f = 0.25$  (hexanes/EA = 5:1).  $^1\text{H NMR}$  (400 MHz,  $\text{CDCl}_3$ )  $\delta$  6.42 (d,  $J = 16.4$  Hz, 1H), 6.24 (d,  $J = 16.4$  Hz, 1H), 5.29 (s, 1H), 5.19 (s, 1H), 5.04 (s, 2H), 4.36 (s, 2H), 1.88 (s, 3H), 1.64 (s, 1H).  $^{13}\text{C NMR}$  (101 MHz,  $\text{CDCl}_3$ )  $\delta$  145.03, 141.78, 131.73, 128.16, 117.72, 115.76, 63.14, 18.31.  $^{19}\text{F NMR}$  (376 MHz, acetone)  $\delta$  -141.69 (q,  $J = 47.8$  Hz). **HRMS(EI)**:  $m/z$  calcd for  $\text{C}_8\text{H}_{12}\text{O}$   $[\text{M}]^+$ : 124.0888, found: 124.0886. IR (neat): 3371, 3083, 2914, 2853, 1671, 1619, 1599, 1452, 1351, 1196, 1061, 961, 891  $\text{cm}^{-1}$ .

2-(Cyclohex-1-en-1-yl)prop-2-en-1-ol (**3q**)

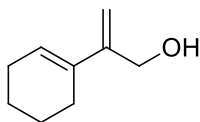

Following the general procedure C, the target compound **3q** was obtained as a colorless oil in 86% yield.  $R_f = 0.33$  (hexanes/EA = 5:1).  $^1\text{H NMR}$  (400 MHz,  $\text{CDCl}_3$ )  $\delta$  5.92 (s, 1H), 5.09 (s, 2H), 4.31 (s, 2H), 2.20 – 2.10 (m, 4H), 1.83 (s, 1H), 1.72 – 1.63 (m, 2H), 1.62 – 1.54 (m, 2H).  $^{13}\text{C NMR}$  (101 MHz,  $\text{CDCl}_3$ )  $\delta$  147.22, 133.98, 124.98, 109.60, 64.15, 25.78, 25.70, 22.68, 22.06. **HRMS(EI)**:  $m/z$  calcd for  $\text{C}_9\text{H}_{14}\text{O}$   $[\text{M}]^+$ : 138.1045, found: 138.1047. IR (neat): 3381, 2931, 2860, 1638, 1448, 1436, 1056, 1031, 895, 848  $\text{cm}^{-1}$ .

2-(Cyclopent-1-en-1-yl)prop-2-en-1-ol (**3r**)

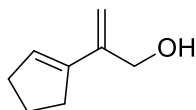

Following the general procedure C, the target compound **3r** was obtained as a colorless oil in 60% yield.  $R_f = 0.27$  (hexanes/EA = 5:1).  $^1\text{H NMR}$  (400 MHz,  $\text{CDCl}_3$ )  $\delta$  5.82 (s, 1H), 5.19 (s, 1H), 5.02 (s, 1H), 4.34 (s, 2H), 2.54 – 2.42 (m, 4H), 1.95 – 1.81 (m, 3H).  $^{13}\text{C NMR}$  (101 MHz,  $\text{CDCl}_3$ )  $\delta$  143.41, 141.02, 127.12, 111.49, 64.16, 33.41, 32.67, 22.55. **HRMS(EI)**:  $m/z$  calcd for  $\text{C}_8\text{H}_{12}\text{O}$   $[\text{M}]^+$ : 124.0888, found: 124.0889. IR (neat): 3349, 2953, 2877, 2850, 1670, 1438, 1298, 1042, 906, 843  $\text{cm}^{-1}$ .

2-(Cyclohept-1-en-1-yl)prop-2-en-1-ol (**3s**)

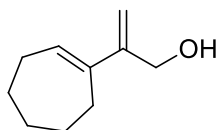

Following the general procedure C, the target compound **3s** was obtained as a colorless oil in 78% yield.  $R_f = 0.29$  (hexanes/EA = 5:1).  $^1\text{H NMR}$  (400 MHz,  $\text{CDCl}_3$ )  $\delta$  6.00 (t,  $J = 6.8$  Hz, 1H), 5.09 (s, 2H), 4.30 (d,  $J = 20.5$  Hz, 2H), 2.38 – 2.34 (m, 2H), 2.21 (dd,  $J = 11.1, 6.6$  Hz, 2H), 1.76 (dt,  $J = 15.0, 5.9$  Hz, 3H), 1.54 – 1.43 (m, 4H).  $^{13}\text{C NMR}$  (101 MHz,  $\text{CDCl}_3$ )  $\delta$  148.76, 142.32, 129.31, 109.78, 64.41, 32.34, 29.80, 28.35, 26.53, 26.30. **HRMS(EI)**:  $m/z$  calcd

for C<sub>10</sub>H<sub>16</sub>O [M]<sup>+</sup>: 152.1201, found: 152.1195. IR (neat): 3346, 3040, 2922, 2851, 1632, 1605, 1447, 1282, 1041, 892, 850 cm<sup>-1</sup>.

(*E*)-3-Methyl-2-methyleneundec-3-en-1-ol (**3t**)

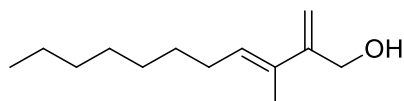

Following the general procedure C, the target compound **3t** was obtained as a colorless oil in 87% yield. R<sub>f</sub> = 0.40 (hexanes/EA = 5:1). <sup>1</sup>H NMR (400 MHz, CDCl<sub>3</sub>) δ 5.62 (t, *J* = 7.1 Hz, 1H), 5.12 (d, *J* = 9.6 Hz, 2H), 4.33 (s, 2H), 2.13 (q, *J* = 7.2 Hz, 2H), 1.80 (s, 3H), 1.68 (s, 1H), 1.45 – 1.34 (m, 2H), 1.33 – 1.23 (m, 8H), 0.88 (t, *J* = 6.8 Hz, 3H). <sup>13</sup>C NMR (101 MHz, CDCl<sub>3</sub>) δ 148.31, 132.06, 128.45, 110.65, 64.29, 31.81, 29.54, 29.36, 29.17, 28.50, 22.63, 14.09, 14.05. **HRMS(EI)**: *m/z* calcd for C<sub>13</sub>H<sub>24</sub>O [M]<sup>+</sup>: 196.1827, found: 196.1824. IR (neat): 3335, 2956, 2926, 2854, 1637, 1610, 1466, 1379, 1050, 895, 723 cm<sup>-1</sup>.

(*E*)-5-Methylenedec-6-en-4-ol (**3u**)

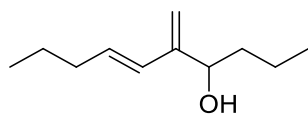

Following the general procedure C, the target compound **3u** was obtained as a colorless oil in 67% yield. R<sub>f</sub> = 0.54 (hexanes/EA = 5:1). <sup>1</sup>H NMR (400 MHz, CDCl<sub>3</sub>) δ 6.01 (d, *J* = 16.3 Hz, 1H), 5.82 (dt, *J* = 15.9, 6.9 Hz, 1H), 5.08 (s, 1H), 5.02 (s, 1H), 4.37 (s, 1H), 2.07 (q, *J* = 7.9 Hz, 2H), 1.69 – 1.56 (m, 3H), 1.52 – 1.35 (m, 4H), 0.93 (t, *J* = 5.6 Hz, 3H), 0.90 (t, *J* = 5.6 Hz, 3H). <sup>13</sup>C NMR (101 MHz, CDCl<sub>3</sub>) δ 149.22, 131.12, 129.17, 111.35, 71.93, 38.53, 35.18, 22.43, 19.02, 13.99, 13.68. **HRMS(EI)**: *m/z* calcd for C<sub>11</sub>H<sub>20</sub>O [M]<sup>+</sup>: 168.1514, found: 168.1513. IR (neat): 3359, 2960, 2932, 2873, 1649, 1608, 1465, 1379, 1029, 967, 896, 742 cm<sup>-1</sup>.

(*E*)-3-Methyleneundec-4-en-2-ol (**3v**)

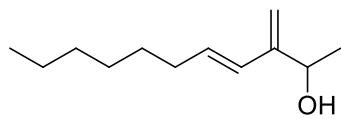

Following the general procedure C, the target compound **3v** was obtained as a colorless oil in 57% yield.  $R_f = 0.38$  (hexanes/EA = 5:1).  $^1\text{H NMR}$  (500 MHz,  $\text{CDCl}_3$ )  $\delta$  6.02 (d,  $J = 16.0$  Hz, 1H), 5.82 (dt,  $J = 16.0, 6.9$  Hz, 1H), 5.12 (s, 1H), 4.99 (s, 1H), 4.56 (q,  $J = 6.3$  Hz, 1H), 2.12 – 2.07 (m, 2H), 1.60 (s, 1H), 1.40 (dd,  $J = 13.1, 7.5$  Hz, 2H), 1.33 – 1.24 (m, 6H), 0.88 (t,  $J = 6.9$  Hz, 3H).  $^{13}\text{C NMR}$  (126 MHz,  $\text{CDCl}_3$ )  $\delta$  150.30, 131.44, 129.10, 110.61, 67.77, 33.13, 31.69, 29.24, 28.87, 22.81, 22.59, 14.06. **HRMS(ESI)**:  $m/z$  calcd for  $\text{C}_{12}\text{H}_{23}\text{O}$ [ $\text{M}+\text{H}$ ] $^+$ : 183.1749, found: 183.1743. IR (neat): 3381, 2956, 2928, 2857, 1638, 1456, 1377, 1072, 906, 755  $\text{cm}^{-1}$ .

(*E*)-Methyl 8-(hydroxymethyl)nona-6,8-dienoate (**3w**)

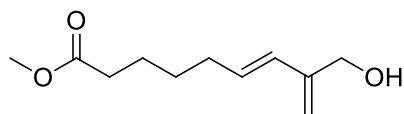

Following the general procedure C, the target compound **3w** was obtained as a white solid in 70% yield.  $R_f = 0.18$  (hexanes/EA = 5:1).  $^1\text{H NMR}$  (400 MHz,  $\text{CDCl}_3$ )  $\delta$  6.07 (d,  $J = 16.1$  Hz, 1H), 5.74 (dt,  $J = 16.0, 6.9$  Hz, 1H), 5.14 (s, 1H), 5.02 (s, 1H), 4.29 (s, 2H), 3.66 (s, 3H), 2.31 (t,  $J = 7.5$  Hz, 2H), 2.15 – 2.07 (m, 2H), 1.68 – 1.58 (m, 3H), 1.48 – 1.37 (m, 2H).  $^{13}\text{C NMR}$  (101 MHz,  $\text{CDCl}_3$ )  $\delta$  174.11, 145.03, 130.40, 129.78, 113.44, 63.21, 51.49, 33.86, 32.58, 28.62, 24.42. **HRMS(ESI)**:  $m/z$  calcd for  $\text{C}_{11}\text{H}_{18}\text{O}_3$ [ $\text{M}$ ] $^+$ : 198.1256, found: 198.1258. IR (neat): 3392, 2932, 2860, 1737, 1649, 1438, 1365, 1211, 1065, 967, 895, 745  $\text{cm}^{-1}$ .

**5. Synthesis of (*R,E*)-4-(4-Bromophenyl)-2-methylene-1-phenylbut-3-en-1-ol ((*R*)-**3h**).**

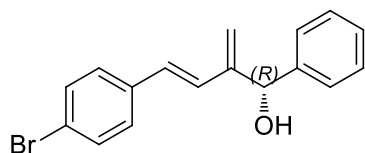

Following the general procedure C, the target compound (*R*)-**3h** was obtained as a white solid 76%.  $R_f = 0.30$  (hexanes/EA = 5:1).  $^1\text{H NMR}$  (400 MHz,  $\text{CDCl}_3$ )  $\delta$  7.46 – 7.43 (m, 2H), 7.40 – 7.34 (m, 4H), 7.34 – 7.28 (m, 1H), 7.18 (d,  $J = 8.5$  Hz, 2H), 6.72 (d,  $J = 16.5$  Hz, 1H), 6.55 (d,  $J = 16.5$  Hz, 1H), 5.56 (s, 1H), 5.48 (s, 2H), 2.20 (s, 1H).  $^{13}\text{C NMR}$  (101

MHz, CDCl<sub>3</sub>)  $\delta$  147.12, 141.77, 135.97, 131.62, 128.79, 128.61, 128.32, 127.96, 127.89, 126.82, 121.38, 116.63, 74.40. **HRMS(EI)**:  $m/z$  calcd for C<sub>17</sub>H<sub>16</sub>BrO[M+H]<sup>+</sup>: 315.0385, found: 315.0394. IR (neat): 3390, 3029, 2924, 2853, 1603, 1487, 1453, 1072, 962, 863, 810, 764 cm<sup>-1</sup>. 95.6% *ee* (Chiralcel IC column, Hexane/*i*PrOH = 97/3, 1.0 mL/min,  $\lambda$  = 280 nm,  $t_R$ (minor) = 11.63,  $t_R$ (major) = 13.99).

## 6. Diels-Alder reaction of compound 3k with N-phenylmaleimide.

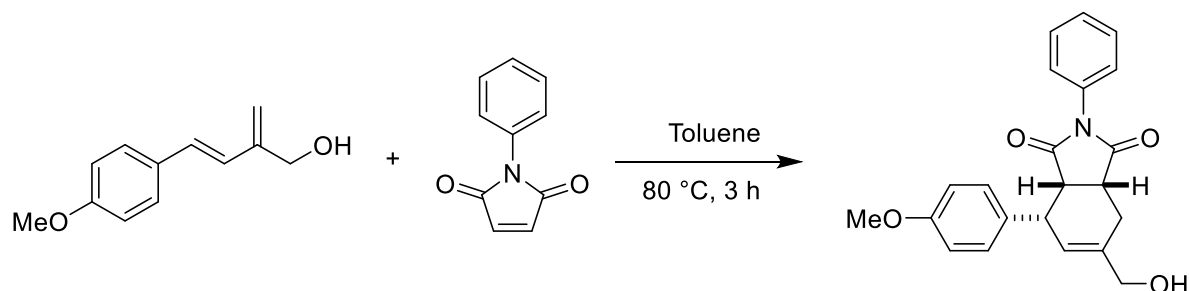

Compound (1.0 equiv.) and N-phenylmaleimide (2.0 equiv.) were dissolved in toluene (2.0 mL) and heated at 80 °C for 3 hrs. After the reaction was completed, the solvent was removed and the residue was purified directly using silica gel chromatography (hexanes/EA = 10:1 to 2:1). The product **4** was obtained as a white solid in 94% yield.  $R_f$  = 0.10 (hexanes/EA = 1:1). <sup>1</sup>H NMR (400 MHz, CDCl<sub>3</sub>)  $\delta$  7.31 (dt,  $J$  = 15.0, 5.0 Hz, 3H), 7.09 (d,  $J$  = 8.6 Hz, 2H), 6.82 (d,  $J$  = 8.6 Hz, 2H), 6.72 (dd,  $J$  = 7.9, 1.4 Hz, 2H), 6.12 (d,  $J$  = 5.3 Hz, 1H), 4.19 (s, 2H), 3.92 (s, 1H), 3.76 (s, 3H), 3.46 – 3.34 (m, 2H), 2.95 (d,  $J$  = 17.3 Hz, 1H), 2.54 (dd,  $J$  = 17.4, 7.0 Hz, 1H), 1.89 (s, 1H). <sup>13</sup>C NMR (101 MHz, CDCl<sub>3</sub>)  $\delta$  178.61, 176.37, 158.93, 138.42, 131.46, 130.20, 130.14, 128.82, 128.36, 126.18, 124.16, 113.88, 66.03, 55.27, 45.18, 40.44, 38.63, 22.88. **HRMS(EI)**:  $m/z$  calcd for C<sub>22</sub>H<sub>22</sub>NO<sub>4</sub> [M+H]<sup>+</sup>: 364.1543, found: 364.1556. IR (neat): 3047, 3062, 2925, 2854, 1755, 1708, 1609, 1513, 1501, 1456, 1386, 1251, 1178, 1031, 835, 737 cm<sup>-1</sup>.

## 7. Selectively epoxidation of double bond in compound 3u.

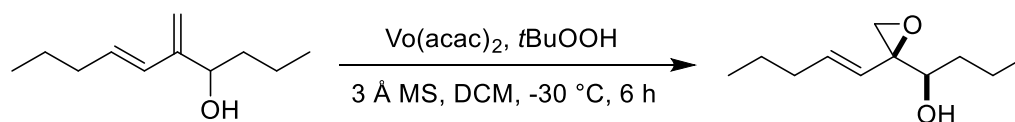

In a flame-dried schlenk tube backfilled with  $\text{N}_2$ ,  $\text{Va}(\text{acac})_2$  (3.8 mg, 0.014 mmol, 0.16 equiv.) and 3 Å MS (20 mg) were added and followed with DCM (1.0 mL). Compound (15.0 mg, 0.09 mmol, 1.0 equiv.) dissolved in dried DCM (0.5 mL) was added, and after the mixture was cooled to  $-30\text{ }^\circ\text{C}$ ,  $t\text{BuOOH}$  (0.15 mL, 0.36 mmol, 4.0 equiv., 2.4 M in toluene) was added dropwise. After the reaction was completed (about 6 hrs), the reaction mixture was quenched using  $\text{Na}_2\text{S}_2\text{O}_4$ , and then dissolved in 20 mL DCM and washed using  $\text{H}_2\text{O}$  (10 mL  $\times$  3), dried using  $\text{MgSO}_4$  and filtered through a pack of celite. After the solvent was removed using ice- $\text{H}_2\text{O}$  bath under vacuum, the product **5** was obtained as a slight yellow oil with a quantitative yield.  $R_f = 0.24$  (hexanes/EA = 5:1).  $^1\text{H}$  NMR (400 MHz,  $\text{CD}_2\text{Cl}_2$ )  $\delta$  5.81 (dt,  $J = 15.6, 6.8$  Hz, 1H), 5.58 (dt,  $J = 15.6, 1.3$  Hz, 1H), 3.72 (dd,  $J = 8.2, 2.8$  Hz, 1H), 2.95 (d,  $J = 5.3$  Hz, 1H), 2.69 (d,  $J = 5.3$  Hz, 1H), 2.03 (ddd,  $J = 14.5, 7.0, 1.3$  Hz, 2H), 1.64 – 1.51 (m, 3H), 1.45 – 1.35 (m, 4H), 0.95 – 0.86 (m, 6H).  $^{13}\text{C}$  NMR (101 MHz,  $\text{CD}_2\text{Cl}_2$ )  $\delta$  135.24, 125.95, 70.53, 61.07, 51.60, 35.67, 34.85, 22.52, 19.30, 14.26, 13.76. **HRMS(ESI)**:  $m/z$  calcd for  $\text{C}_{11}\text{H}_{20}\text{O}_2\text{Na}$   $[\text{M}+\text{Na}]^+$ : 207.1356, found: 207.1367. IR (neat): 3351, 2960, 2932, 2874, 1706, 1586, 1530, 1458, 1380, 1364, 1246, 1197, 1026, 974, 847, 747  $\text{cm}^{-1}$ .

### Computational details.

Calculations were performed at the B3LYP<sup>[21]</sup> level of theory with differentiated basis set in gas phase and also in DCM as solvent with Polarizable Continuum Model (PCM)<sup>[22]</sup> as a single point calculation. The P, C, N, F, O, B and H atoms were described 6-31+G(d,p) basis set and Au atom with LANL2DZ<sup>[23],[24]</sup> relativistic effective core potential (ECP) basis set using Gaussian 09 software suite.<sup>[25]</sup> All of the degrees of conformational freedom were considered. Vibrational frequencies were computed at the same level of theory to verify that the optimized structures were

minima. For TS, IRC calculations were computed at the same level of theory in order to confirm the structures.

**Pathway III, B(F)OH moiety, *in gas phase***

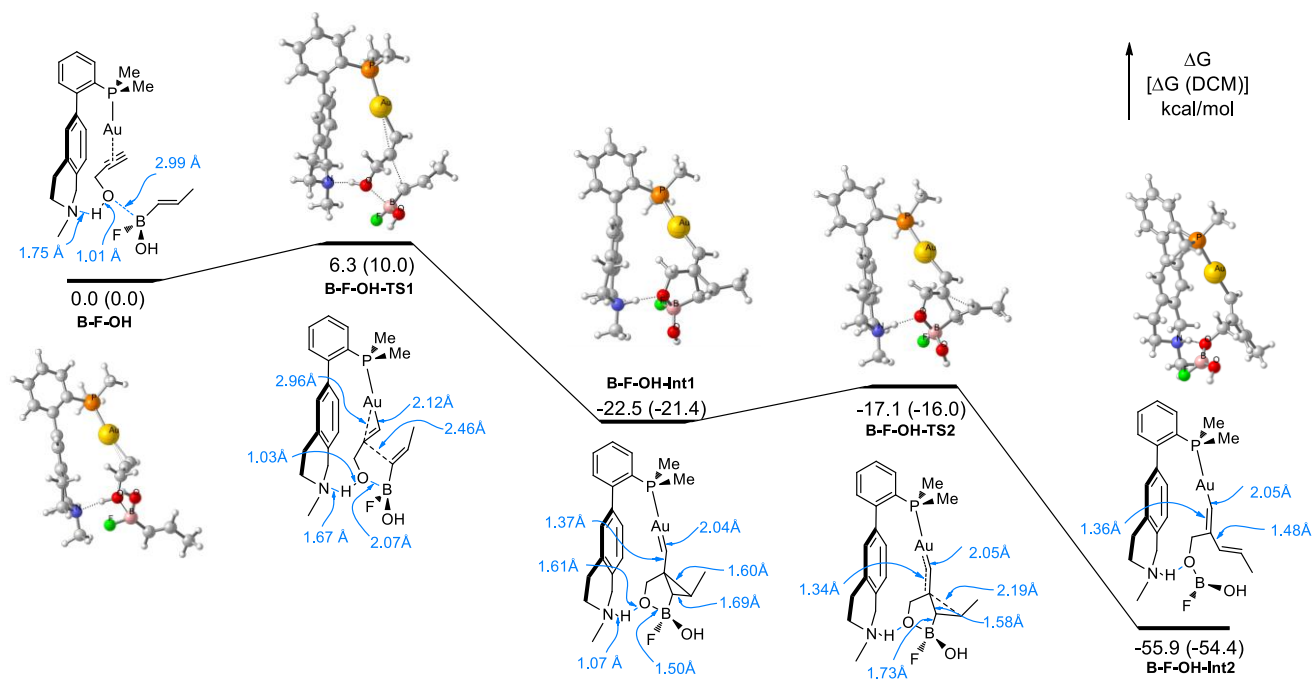

**Figure 1.** Reaction pathway modeled.

**Cartesian coordinates and energies calculated for complex B-F-OH in gas phase.**

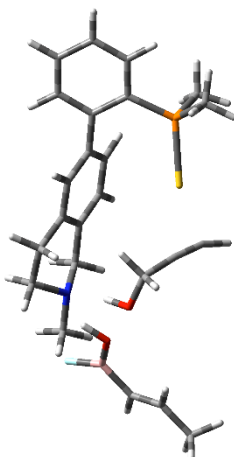

Energy = -1740.507147 (aU); Number of Imaginary Frequencies = 0

|   |             |             |             |
|---|-------------|-------------|-------------|
| P | 3.44955300  | -1.27946400 | 0.04285200  |
| C | 4.04700200  | 0.29358600  | 0.78025800  |
| C | 5.26431800  | 0.22981200  | 1.48720800  |
| C | 5.80504000  | 1.35486700  | 2.10533500  |
| C | 5.12539600  | 2.57172900  | 2.03077100  |
| C | 3.92445600  | 2.65026400  | 1.32908800  |
| C | 3.36427600  | 1.53182400  | 0.68478300  |
| H | 5.80408900  | -0.70749700 | 1.56917600  |
| H | 6.74512200  | 1.27701300  | 2.64220800  |
| H | 5.53158100  | 3.45762100  | 2.50922500  |
| H | 3.40726300  | 3.60180300  | 1.25332400  |
| C | 2.08417600  | 1.74122400  | -0.05332900 |
| C | 1.99518000  | 1.58522300  | -1.44787200 |
| C | 0.94920100  | 2.18389900  | 0.63949300  |
| C | 0.79028800  | 1.82715200  | -2.10564500 |
| H | 2.87399100  | 1.30318100  | -2.02031800 |
| C | -0.26532700 | 2.43845900  | -0.01324300 |
| C | -0.35036600 | 2.23591600  | -1.40096500 |



|    |             |             |             |
|----|-------------|-------------|-------------|
| H  | 0.73503700  | 1.69914700  | -3.18415400 |
| C  | 3.96594000  | -2.63231500 | 1.17809700  |
| H  | 5.05301300  | -2.69766500 | 1.26742600  |
| H  | 3.52833200  | -2.47549000 | 2.16680700  |
| H  | 3.59216800  | -3.57729800 | 0.77531700  |
| C  | 4.45833500  | -1.55623600 | -1.47234900 |
| H  | 5.52246800  | -1.49342600 | -1.22571100 |
| H  | 4.23839100  | -2.54501200 | -1.88420000 |
| H  | 4.22233200  | -0.79941600 | -2.22332100 |
| C  | -1.28404200 | -1.60384400 | -0.56088100 |
| C  | -2.14134100 | -0.81953800 | 0.37147700  |
| H  | -1.50929700 | -0.11556500 | 0.92921400  |
| H  | -2.56525100 | -1.52331700 | 1.09917300  |
| O  | -3.19155700 | -0.20312400 | -0.31354700 |
| H  | -2.95311200 | 0.72519900  | -0.62030000 |
| C  | -0.72639300 | -2.29480800 | -1.41501100 |
| H  | -0.55232700 | -2.97556000 | -2.22495800 |
| Au | 1.17359100  | -1.51915200 | -0.45874600 |
| C  | -1.47141200 | 2.90971500  | 0.77793400  |
| H  | -1.18681300 | 3.75102200  | 1.42102100  |
| H  | -1.79739400 | 2.10985800  | 1.45654900  |
| C  | -2.64569900 | 3.32404200  | -0.11337400 |
| H  | -2.48605100 | 4.34091000  | -0.51305400 |
| H  | -3.57041500 | 3.33810300  | 0.46857200  |
| C  | -1.65638800 | 2.46448800  | -2.13193500 |
| H  | -1.64087900 | 3.45388100  | -2.62753000 |
| H  | -1.77501000 | 1.71634800  | -2.92347600 |
| C  | -4.07115700 | 2.58968100  | -1.94489500 |

|   |             |             |             |
|---|-------------|-------------|-------------|
| H | -4.16660800 | 1.85482900  | -2.74928900 |
| H | -4.90702700 | 2.45921000  | -1.25406300 |
| H | -4.12135000 | 3.59943300  | -2.38272300 |
| N | -2.80774900 | 2.36643700  | -1.22311000 |
| H | 1.01132700  | 2.33145600  | 1.71559600  |
| C | -6.44295100 | -0.78898200 | 0.77357600  |
| H | -6.88873100 | -0.39128200 | -0.13914800 |
| C | -6.79018200 | -2.03029100 | 1.16449200  |
| H | -6.35651300 | -2.42415200 | 2.08550100  |
| B | -5.48379700 | 0.10732200  | 1.58123300  |
| C | -7.74384400 | -2.94121600 | 0.45311000  |
| H | -8.13852400 | -2.48666800 | -0.46026100 |
| H | -7.25424600 | -3.88779400 | 0.18918500  |
| H | -8.58786100 | -3.20287000 | 1.10426400  |
| F | -5.36253600 | 1.43189700  | 1.27395000  |
| O | -4.77118900 | -0.35208000 | 2.65415500  |
| H | -4.33366900 | 0.35395800  | 3.14655300  |

**Cartesian coordinates and energies calculated for TS B-F-OH-TS1 in gas phase.**

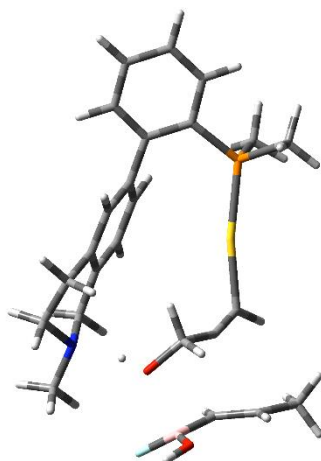

Energy = -1740.497046 (aU); Number of Imaginary Frequencies = 1(-171.2).

|   |             |             |             |
|---|-------------|-------------|-------------|
| P | -3.15300200 | -1.32135300 | 0.11839000  |
| C | -4.01741200 | 0.25262300  | -0.29219000 |
| C | -5.35406700 | 0.14801100  | -0.72395800 |
| C | -6.09045200 | 1.27156200  | -1.09301000 |
| C | -5.49148700 | 2.53135600  | -1.04327600 |
| C | -4.17299800 | 2.65170100  | -0.60965000 |
| C | -3.41537400 | 1.53290200  | -0.21708400 |
| H | -5.83615000 | -0.82203800 | -0.78366700 |
| H | -7.11951200 | 1.16016100  | -1.41995300 |
| H | -6.04998100 | 3.41682700  | -1.33108100 |
| H | -3.71486200 | 3.63412700  | -0.54736200 |
| C | -2.02457900 | 1.78163100  | 0.26226100  |
| C | -1.63410600 | 1.48684600  | 1.58036200  |
| C | -1.09119500 | 2.38886600  | -0.58711000 |
| C | -0.33508300 | 1.75596300  | 2.00472600  |
| H | -2.35298000 | 1.06922300  | 2.27894900  |
| C | 0.21520500  | 2.67562300  | -0.16661200 |
| C | 0.60348200  | 2.33277400  | 1.13829100  |

|    |             |             |             |
|----|-------------|-------------|-------------|
| H  | -0.04529400 | 1.51561700  | 3.02492500  |
| C  | -3.79368700 | -2.57853800 | -1.06634800 |
| H  | -4.86968100 | -2.73692600 | -0.96007300 |
| H  | -3.57260200 | -2.26777200 | -2.09028300 |
| H  | -3.28046200 | -3.52363400 | -0.87001000 |
| C  | -3.84601800 | -1.85619500 | 1.74054900  |
| H  | -4.93931900 | -1.86636900 | 1.70021100  |
| H  | -3.48165300 | -2.85928100 | 1.97893600  |
| H  | -3.52614200 | -1.17029100 | 2.52802900  |
| C  | 2.11400000  | -1.26253400 | -0.39608200 |
| C  | 2.50120600  | -0.25589000 | -1.41286700 |
| H  | 1.57120800  | 0.27155600  | -1.66920900 |
| H  | 2.86269100  | -0.75979800 | -2.31496700 |
| O  | 3.50774300  | 0.63533000  | -1.00059400 |
| H  | 3.20109500  | 1.38356400  | -0.36335000 |
| C  | 1.26813000  | -1.90385000 | 0.30596800  |
| H  | 1.44531800  | -2.74207800 | 0.96922400  |
| Au | -0.79505700 | -1.42649400 | 0.15078800  |
| C  | 1.19566200  | 3.33926100  | -1.11473000 |
| H  | 0.71490100  | 4.18961500  | -1.61214000 |
| H  | 1.47238500  | 2.63995200  | -1.91489200 |
| C  | 2.46266500  | 3.82053200  | -0.40529700 |
| H  | 2.26519000  | 4.75089500  | 0.15357000  |
| H  | 3.24522500  | 4.03806700  | -1.13744300 |
| C  | 2.01029400  | 2.60172900  | 1.62765700  |
| H  | 2.01484500  | 3.49924500  | 2.27301700  |
| H  | 2.35585200  | 1.76674800  | 2.24720100  |
| C  | 4.29698600  | 3.13813900  | 1.04237100  |

|   |             |             |             |
|---|-------------|-------------|-------------|
| H | 4.64661200  | 2.35798400  | 1.72221000  |
| H | 5.00770300  | 3.20838400  | 0.21632500  |
| H | 4.27344000  | 4.09815600  | 1.58011200  |
| N | 2.96497600  | 2.78022700  | 0.51815700  |
| H | -1.38717200 | 2.64180300  | -1.60284700 |
| C | 4.46419700  | -1.62623900 | 0.23099000  |
| H | 4.30780800  | -1.46133400 | 1.29845600  |
| C | 4.22829300  | -2.87536500 | -0.25670700 |
| H | 4.43514500  | -3.05616500 | -1.31240300 |
| B | 5.19198900  | -0.50439600 | -0.61470200 |
| C | 3.78941900  | -4.06039300 | 0.53919200  |
| H | 3.56239500  | -3.80472500 | 1.57854700  |
| H | 2.92390900  | -4.55536700 | 0.08094200  |
| H | 4.59392400  | -4.80808200 | 0.54698800  |
| F | 5.86809800  | 0.46920500  | 0.05960800  |
| O | 5.54884200  | -0.81683000 | -1.90258000 |
| H | 6.10192100  | -0.14829300 | -2.32538000 |

**Cartesian coordinates and energies calculated for complex B-F-OH-Int1 in gas phase.**

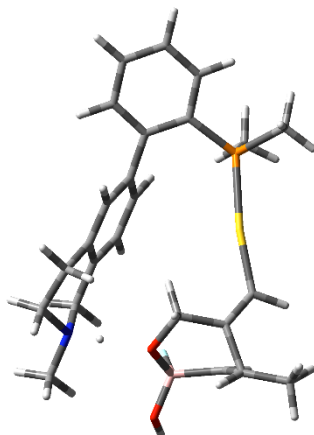

Energy = -1740.542943 (aU); Number of Imaginary Frequencies = 0

|   |             |             |             |
|---|-------------|-------------|-------------|
| P | -3.06845600 | -1.00737100 | 0.47709400  |
| C | -3.79870100 | 0.59814200  | -0.07667300 |
| C | -5.16454900 | 0.59855400  | -0.41996900 |
| C | -5.80540300 | 1.74403500  | -0.88907900 |
| C | -5.07952900 | 2.92590200  | -1.03229600 |
| C | -3.72908700 | 2.94650100  | -0.69085200 |
| C | -3.06451700 | 1.80507600  | -0.20421100 |
| H | -5.74913900 | -0.30985000 | -0.33327000 |
| H | -6.86012000 | 1.70694500  | -1.14323500 |
| H | -5.56045100 | 3.82793500  | -1.39813100 |
| H | -3.16988000 | 3.87321000  | -0.77667400 |
| C | -1.62602800 | 1.98284700  | 0.15768700  |
| C | -1.15956800 | 1.79594400  | 1.47006000  |
| C | -0.72219800 | 2.45794400  | -0.80266600 |
| C | 0.16847400  | 2.06071000  | 1.79446700  |
| H | -1.84395300 | 1.47577300  | 2.24845100  |
| C | 0.61386600  | 2.73780200  | -0.48676600 |

|    |             |             |             |
|----|-------------|-------------|-------------|
| C  | 1.06356600  | 2.53342400  | 0.82604100  |
| H  | 0.51512300  | 1.89748100  | 2.81131100  |
| C  | -4.14487500 | -2.31750400 | -0.25243300 |
| H  | -5.16702800 | -2.28427700 | 0.13325700  |
| H  | -4.16103000 | -2.23015200 | -1.34151900 |
| H  | -3.70884400 | -3.28537800 | 0.00929900  |
| C  | -3.46140000 | -1.14279400 | 2.27686800  |
| H  | -4.52273400 | -0.94264800 | 2.45099000  |
| H  | -3.22285000 | -2.15578200 | 2.61365800  |
| H  | -2.86433500 | -0.43791300 | 2.85773600  |
| C  | 2.17698100  | -1.87462300 | -0.78316300 |
| C  | 2.23992100  | -0.42366300 | -1.23816300 |
| H  | 1.32312800  | 0.08406200  | -0.91565700 |
| H  | 2.30855800  | -0.36185400 | -2.33265600 |
| O  | 3.39722000  | 0.18747900  | -0.67643700 |
| H  | 3.39549100  | 1.75436500  | -0.32564400 |
| C  | 1.04324000  | -2.46742600 | -0.28375100 |
| H  | 1.16465300  | -3.51150500 | 0.00952900  |
| Au | -0.80096400 | -1.64785500 | 0.01280700  |
| C  | 1.56631700  | 3.19332200  | -1.57713900 |
| H  | 1.11659500  | 4.00263600  | -2.16288600 |
| H  | 1.73473300  | 2.36767200  | -2.28033900 |
| C  | 2.91269700  | 3.68137300  | -1.04257700 |
| H  | 2.83820900  | 4.68161000  | -0.60326700 |
| H  | 3.66402800  | 3.70848000  | -1.83490100 |
| C  | 2.49615000  | 2.81329100  | 1.22392800  |
| H  | 2.60672300  | 3.80676400  | 1.67560100  |
| H  | 2.85006300  | 2.05535900  | 1.92531900  |

|   |             |             |             |
|---|-------------|-------------|-------------|
| C | 4.82834100  | 3.06147700  | 0.42073600  |
| H | 5.14961500  | 2.31907300  | 1.15093600  |
| H | 5.45675800  | 2.97467700  | -0.46633900 |
| H | 4.88812500  | 4.07174500  | 0.83183000  |
| N | 3.41446900  | 2.76570300  | 0.03592200  |
| H | -1.06589700 | 2.60689700  | -1.82358500 |
| C | 3.50076500  | -2.12071000 | 0.24537800  |
| H | 3.29562500  | -2.78456200 | 1.08529800  |
| C | 3.51365100  | -2.70273000 | -1.07275300 |
| H | 4.06418300  | -2.12885200 | -1.82054600 |
| B | 3.95277600  | -0.55611800 | 0.50023500  |
| C | 3.48275900  | -4.19427200 | -1.33092700 |
| H | 2.93969500  | -4.74198400 | -0.55573700 |
| H | 3.03625800  | -4.42604100 | -2.30253300 |
| H | 4.51138600  | -4.57090300 | -1.33549900 |
| F | 3.30674500  | -0.11050400 | 1.71293100  |
| O | 5.35885300  | -0.30064000 | 0.53392500  |
| H | 5.76065200  | -0.58708500 | 1.36164900  |

**Cartesian coordinates and energies calculated for TS B-F-OH-TS2 in gas phase.**



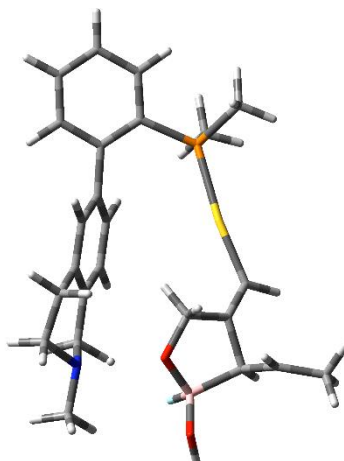

Energy = -1740.534404 (aU); Number of Imaginary Frequencies = 1(-131.9).

|   |             |             |             |
|---|-------------|-------------|-------------|
| P | -3.14614300 | -1.19379300 | 0.23461800  |
| C | -3.92915200 | 0.43616900  | -0.16065500 |
| C | -5.29821100 | 0.41918400  | -0.49082600 |
| C | -5.98610200 | 1.57849200  | -0.84321200 |
| C | -5.30465700 | 2.79529700  | -0.87821100 |
| C | -3.95296000 | 2.83399400  | -0.54454200 |
| C | -3.24303700 | 1.67592000  | -0.17296100 |
| H | -5.84726400 | -0.51615100 | -0.48382700 |
| H | -7.04178500 | 1.52720700  | -1.09105900 |
| H | -5.82210600 | 3.70945400  | -1.15281900 |
| H | -3.42888000 | 3.78504200  | -0.54457200 |
| C | -1.81027000 | 1.87203600  | 0.20242100  |
| C | -1.33555600 | 1.59721100  | 1.49612200  |
| C | -0.92415900 | 2.44579100  | -0.71862700 |
| C | -0.01597000 | 1.87936600  | 1.83968300  |
| H | -2.00553400 | 1.18498200  | 2.24393900  |
| C | 0.40475700  | 2.73851400  | -0.38468400 |
| C | 0.86357700  | 2.44851600  | 0.90894000  |

|    |             |             |             |
|----|-------------|-------------|-------------|
| H  | 0.33518000  | 1.65329100  | 2.84321500  |
| C  | -3.99666600 | -2.41032800 | -0.86341100 |
| H  | -5.07049100 | -2.47661100 | -0.67169600 |
| H  | -3.83039800 | -2.14289800 | -1.90992500 |
| H  | -3.54898600 | -3.39147700 | -0.68310100 |
| C  | -3.80624600 | -1.61999600 | 1.90674700  |
| H  | -4.89755200 | -1.54515000 | 1.92499300  |
| H  | -3.50793800 | -2.64181600 | 2.15772200  |
| H  | -3.39139300 | -0.94424600 | 2.65830500  |
| C  | 2.23057700  | -1.57944800 | -0.34853500 |
| C  | 2.26683400  | -0.35053000 | -1.22256800 |
| H  | 1.35009900  | 0.22842200  | -1.07174500 |
| H  | 2.32802100  | -0.60852300 | -2.29043300 |
| O  | 3.41897900  | 0.40786000  | -0.86441200 |
| H  | 3.26911400  | 1.91657700  | -0.30109600 |
| C  | 1.16336800  | -2.23502200 | 0.13437600  |
| H  | 1.36928000  | -3.15840900 | 0.67844300  |
| Au | -0.79303000 | -1.61478900 | 0.11479200  |
| C  | 1.33916500  | 3.30913300  | -1.43512900 |
| H  | 0.84690100  | 4.11925200  | -1.98417500 |
| H  | 1.57328600  | 2.53588500  | -2.17820400 |
| C  | 2.64005800  | 3.85056000  | -0.84798400 |
| H  | 2.48664700  | 4.80010100  | -0.32457900 |
| H  | 3.39277100  | 4.00091600  | -1.62503300 |
| C  | 2.28611100  | 2.74682800  | 1.33258800  |
| H  | 2.34897300  | 3.68376100  | 1.89974900  |
| H  | 2.69015900  | 1.93834100  | 1.94592900  |
| C  | 4.58897800  | 3.26247600  | 0.57704300  |

|   |             |             |             |
|---|-------------|-------------|-------------|
| H | 4.93411900  | 2.53543700  | 1.31135400  |
| H | 5.24058300  | 3.23020200  | -0.29714400 |
| H | 4.57295600  | 4.26850400  | 1.00216100  |
| N | 3.20549800  | 2.88441800  | 0.15307700  |
| H | -1.27608700 | 2.66440300  | -1.72401400 |
| C | 3.71281200  | -1.91264200 | 0.10150300  |
| H | 3.77709400  | -2.33354200 | 1.10650600  |
| C | 3.92928600  | -2.83513400 | -0.92967300 |
| H | 3.86144000  | -2.47073800 | -1.95583400 |
| B | 4.36709200  | -0.30815700 | 0.02336200  |
| C | 4.25092300  | -4.27428800 | -0.78403200 |
| H | 4.26859300  | -4.60375200 | 0.25643200  |
| H | 3.55750500  | -4.89577100 | -1.36418900 |
| H | 5.24240100  | -4.44429700 | -1.23249800 |
| O | 5.68749400  | -0.18360700 | -0.46975100 |
| H | 6.35284200  | -0.33018100 | 0.21160900  |
| F | 4.23838700  | 0.19113900  | 1.36626800  |

**Cartesian coordinates and energies calculated for complex B-F-OH-Int2 in gas phase.**

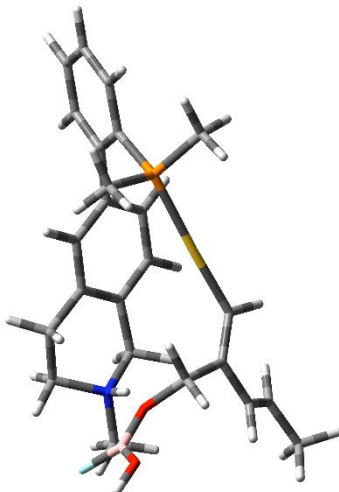

Energy = -1740.596171 (aU); Number of Imaginary Frequencies = 0

|   |             |             |             |
|---|-------------|-------------|-------------|
| P | 2.89448600  | -1.21587700 | 0.64948100  |
| C | 3.97070000  | 0.24039200  | 0.25067700  |
| C | 5.35628200  | 0.11094000  | 0.46296900  |
| C | 6.24367900  | 1.14294700  | 0.16169600  |
| C | 5.75566800  | 2.33755100  | -0.36980400 |
| C | 4.38576000  | 2.48812500  | -0.57944100 |
| C | 3.47695500  | 1.46171600  | -0.26924000 |
| H | 5.76086000  | -0.81227800 | 0.86493200  |
| H | 7.30698400  | 1.01016500  | 0.33623000  |
| H | 6.43455400  | 3.14829900  | -0.61613000 |
| H | 4.00103400  | 3.42067200  | -0.98210400 |
| C | 2.02543000  | 1.73472600  | -0.50836600 |
| C | 1.50750600  | 1.73967400  | -1.81469400 |
| C | 1.16440500  | 2.03209400  | 0.55225600  |
| C | 0.15179900  | 1.96061000  | -2.03145600 |
| H | 2.16323800  | 1.53185100  | -2.65445000 |
| C | -0.20046900 | 2.27460900  | 0.34469700  |
| C | -0.71353300 | 2.20283400  | -0.95644100 |

|    |             |             |             |
|----|-------------|-------------|-------------|
| H  | -0.24197800 | 1.91510500  | -3.04385500 |
| C  | 2.92858900  | -1.29933200 | 2.49499100  |
| H  | 3.95593100  | -1.29923000 | 2.87126800  |
| H  | 2.39695400  | -0.44200100 | 2.91514600  |
| H  | 2.42446100  | -2.21419400 | 2.81946600  |
| C  | 3.88989500  | -2.68797300 | 0.15131600  |
| H  | 4.83897100  | -2.76125800 | 0.68840800  |
| H  | 3.29633100  | -3.58140200 | 0.36418800  |
| H  | 4.08373100  | -2.65340500 | -0.92368100 |
| C  | -2.40432500 | -1.52505900 | -0.59461500 |
| C  | -2.59283000 | -1.53305900 | 0.89695000  |
| H  | -1.63207400 | -1.56875100 | 1.41226100  |
| H  | -3.21675600 | -2.36952200 | 1.22582700  |
| O  | -3.27247700 | -0.28986700 | 1.33024900  |
| C  | -1.16362800 | -1.54414100 | -1.14148000 |
| H  | -1.14669500 | -1.65836100 | -2.22876900 |
| Au | 0.68367300  | -1.37293400 | -0.27387100 |
| C  | -1.10968000 | 2.55505800  | 1.52523900  |
| H  | -0.64911200 | 3.28898400  | 2.19556800  |
| H  | -1.24761000 | 1.64009400  | 2.11518700  |
| C  | -2.47439400 | 3.09092700  | 1.10528400  |
| H  | -2.41509300 | 4.11151000  | 0.71485000  |
| H  | -3.18855900 | 3.06585000  | 1.93013100  |
| C  | -2.19011000 | 2.36088200  | -1.24369600 |
| H  | -2.42192500 | 3.34130900  | -1.67631300 |
| H  | -2.53485300 | 1.58849100  | -1.93619600 |
| C  | -4.47265600 | 2.54638100  | -0.29228700 |
| H  | -4.81624900 | 1.89075000  | -1.09367700 |

|   |             |             |             |
|---|-------------|-------------|-------------|
| H | -5.05464400 | 2.36632300  | 0.61131400  |
| H | -4.55657800 | 3.59156200  | -0.59527300 |
| N | -3.03618100 | 2.23565200  | -0.00451200 |
| H | 1.56090000  | 2.07201400  | 1.56403500  |
| C | -3.86113800 | -1.17254400 | -2.63737800 |
| H | -3.02829500 | -0.71695100 | -3.17668400 |
| B | -4.13218000 | -0.27411900 | 2.38213900  |
| O | -4.44453200 | -1.37252400 | 3.10524400  |
| H | -5.07833500 | -1.23238800 | 3.81969000  |
| C | -5.13714000 | -1.34108500 | -3.41167400 |
| H | -5.92754900 | -1.78411300 | -2.79774100 |
| H | -5.50318500 | -0.38458900 | -3.80725200 |
| H | -4.98188900 | -1.99394500 | -4.28044700 |
| C | -3.66511500 | -1.58763100 | -1.37234500 |
| H | -4.51988700 | -2.02439000 | -0.84933100 |
| H | -3.00614100 | 1.24902700  | 0.33308500  |
| F | -4.67374100 | 0.93922800  | 2.67465800  |

Energies for these structures computed as a single point in DCM using differentiated basis set (6-31+G(d,p) for C, H, O, N, F, P and B; def2-TZVP<sup>[26]</sup> for Au) were reported below.

| Compound Name      | Energy (aU)  | $\Delta G$ and $\Delta G^\ddagger$              |
|--------------------|--------------|-------------------------------------------------|
| <b>B-F-OH</b>      | -1740.889914 |                                                 |
| <b>B-F-OH-TS1</b>  | -1740.873925 | $\Delta G^\ddagger = 10$ kcal/mol               |
| <b>B-F-OH-Int1</b> | -1740.924051 | $\Delta G^{\text{B-F-OH/Int1}} = 21.4$ kcal/mol |
| <b>B-F-OH-TS2</b>  | -1740.915490 | $\Delta G^\ddagger = 5.4$ kcal/mol              |
| <b>B-F-OH-Int2</b> | -1740.976708 | $\Delta G^{\text{Int1/Int2}} = 33$ kcal/mol     |

**Pathway II, B(OH)F moiety, in gas phase.**

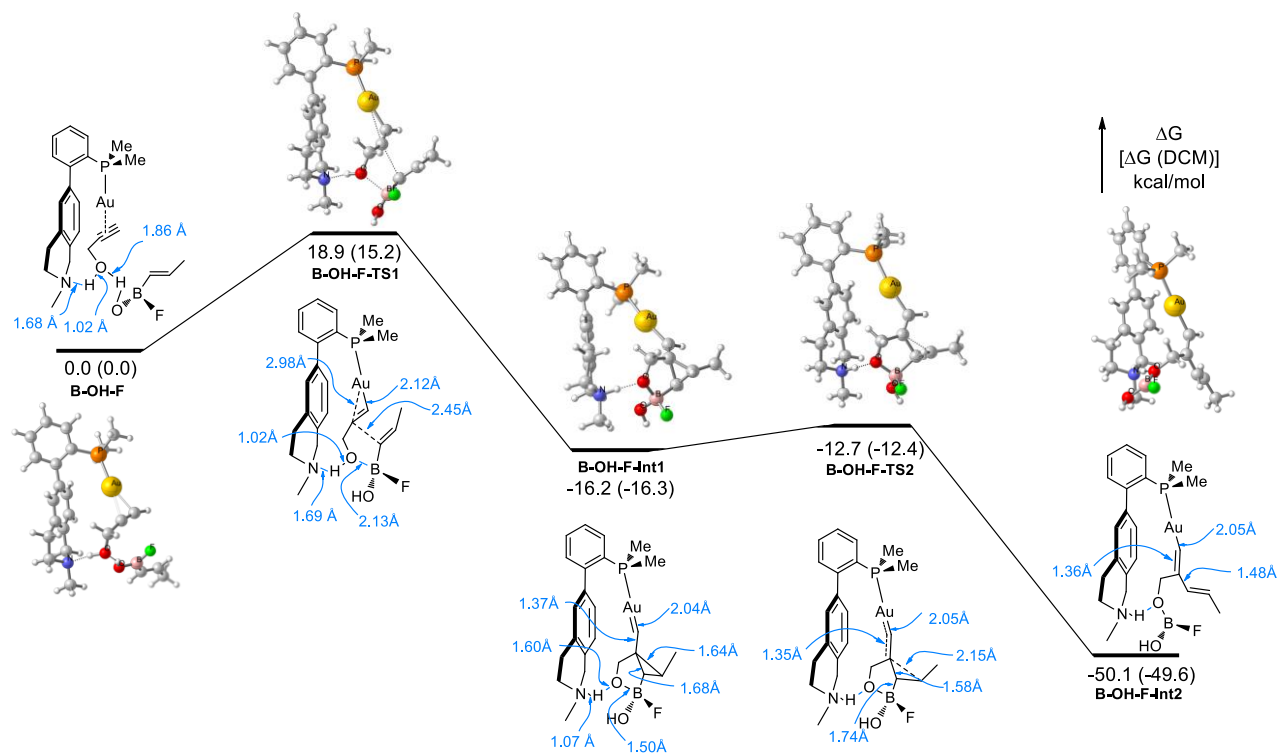

**Figure 1.** Reaction pathway modeled.



**Cartesian coordinates and energies calculated for complex B-OH-F in gas phase.**

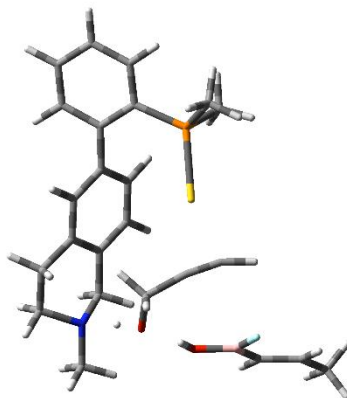

Energy = -1740.516494 (aU); Number of Imaginary Frequencies = 0

|   |             |             |            |
|---|-------------|-------------|------------|
| P | -2.83073900 | -1.75962900 | 0.18883700 |
| C | -3.95630300 | -0.35889100 | 0.56882500 |
| C | -5.33594200 | -0.64498000 | 0.56923800 |
| C | -6.28346100 | 0.34533400  | 0.81804200 |
| C | -5.86073000 | 1.65218700  | 1.06499400 |
| C | -4.49932100 | 1.94740000  | 1.07482400 |
| C | -3.52145400 | 0.96293000  | 0.84044800 |
| H | -5.68914800 | -1.64998400 | 0.36583400 |
| H | -7.33972800 | 0.09570200  | 0.81340600 |
| H | -6.58597200 | 2.43666500  | 1.25814600 |
| H | -4.17124800 | 2.95921000  | 1.29182200 |
| C | -2.09456500 | 1.39392400  | 0.90330100 |
| C | -1.19604600 | 0.86018700  | 1.84403300 |
| C | -1.64327100 | 2.42464800  | 0.06696600 |
| C | 0.11585700  | 1.32604000  | 1.90836300 |
| H | -1.53181600 | 0.10558300  | 2.54865800 |
| C | -0.32954500 | 2.90968700  | 0.13153100 |

|    |             |             |             |
|----|-------------|-------------|-------------|
| C  | 0.56649900  | 2.34006900  | 1.05192300  |
| H  | 0.80019500  | 0.89932100  | 2.63759300  |
| C  | -3.73972100 | -2.88080900 | -0.95343100 |
| H  | -4.63328000 | -3.30322000 | -0.48730200 |
| H  | -4.02193900 | -2.34118500 | -1.86049900 |
| H  | -3.07047700 | -3.70039000 | -1.22783300 |
| C  | -2.66909400 | -2.74676200 | 1.73480800  |
| H  | -3.66355000 | -2.97998300 | 2.12688500  |
| H  | -2.13565600 | -3.67690900 | 1.52013600  |
| H  | -2.11226200 | -2.18643300 | 2.48806900  |
| C  | 1.29543800  | -0.54422000 | -1.88281300 |
| C  | 1.48642200  | 0.83191300  | -2.40817100 |
| H  | 0.59139700  | 1.43120000  | -2.20569500 |
| H  | 1.58560400  | 0.74403000  | -3.49904100 |
| O  | 2.65146700  | 1.40724900  | -1.87145300 |
| H  | 2.45273600  | 2.20240600  | -1.26266700 |
| C  | 1.37428300  | -1.70859600 | -1.49124400 |
| H  | 1.73568100  | -2.69770700 | -1.28717600 |
| Au | -0.72417100 | -1.30615200 | -0.73613200 |
| C  | 0.11422500  | 4.02668200  | -0.79542800 |
| H  | -0.60769400 | 4.85090100  | -0.75556000 |
| H  | 0.10048400  | 3.66920900  | -1.83427400 |
| C  | 1.51018100  | 4.56016400  | -0.46080000 |
| H  | 1.46164600  | 5.26350500  | 0.38790800  |
| H  | 1.91732900  | 5.10854100  | -1.31483400 |
| C  | 2.00115200  | 2.81655000  | 1.12832800  |
| H  | 2.11709900  | 3.52954100  | 1.96526200  |
| H  | 2.66897300  | 1.97271500  | 1.32885200  |

|   |             |             |             |
|---|-------------|-------------|-------------|
| C | 3.82385000  | 3.90734200  | -0.04300100 |
| H | 4.46979900  | 3.05709300  | 0.18895000  |
| H | 4.13033200  | 4.32738900  | -1.00443100 |
| H | 3.94853400  | 4.67581300  | 0.73533800  |
| N | 2.42462700  | 3.44863300  | -0.13497800 |
| H | -2.33155300 | 2.85977100  | -0.65439700 |
| C | 5.85428200  | -1.34794500 | 1.25387200  |
| H | 6.22691700  | -0.58047500 | 1.93387500  |
| C | 6.29853500  | -2.61008600 | 1.41376900  |
| H | 5.93685800  | -3.37921000 | 0.72865300  |
| B | 4.86902200  | -0.93153900 | 0.14151100  |
| O | 4.45927200  | 0.35132800  | -0.01455100 |
| H | 3.87091100  | 0.52392200  | -0.77828000 |
| C | 7.27164400  | -3.07512200 | 2.45369300  |
| H | 7.59055200  | -2.25917500 | 3.10862100  |
| H | 6.83172500  | -3.86857800 | 3.07170400  |
| H | 8.16181600  | -3.51079500 | 1.98176700  |
| F | 4.36282600  | -1.87503200 | -0.71274700 |

**Cartesian coordinates and energies calculated for TS B-OH-F-TS1 in gas phase.**

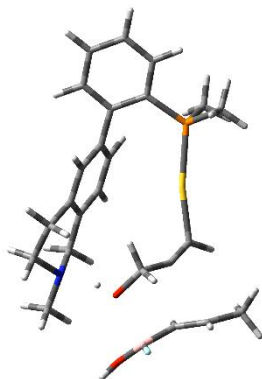

Energy = -1740.495970 (aU); Number of Imaginary Frequencies = 1(-170.9).

|   |             |             |             |
|---|-------------|-------------|-------------|
| P | -3.14675700 | -1.33153500 | 0.11537100  |
| C | -4.02527700 | 0.23854200  | -0.27953600 |
| C | -5.36488500 | 0.12768100  | -0.70042100 |
| C | -6.11175000 | 1.24866400  | -1.05591000 |
| C | -5.52068500 | 2.51211500  | -1.00304700 |
| C | -4.19926600 | 2.63845300  | -0.58019500 |
| C | -3.43101700 | 1.52209000  | -0.20163800 |
| H | -5.84099300 | -0.84525100 | -0.76219500 |
| H | -7.14280600 | 1.13260600  | -1.37486000 |
| H | -6.08750700 | 3.39566100  | -1.28030500 |
| H | -3.74678900 | 3.62337200  | -0.51593100 |
| C | -2.03702000 | 1.77624000  | 0.26547200  |
| C | -1.63287200 | 1.48204800  | 1.57959200  |

|    |             |             |             |
|----|-------------|-------------|-------------|
| C  | -1.11433400 | 2.38774000  | -0.59222100 |
| C  | -0.33107900 | 1.75693100  | 1.99197900  |
| H  | -2.34310900 | 1.06010800  | 2.28445400  |
| C  | 0.19466900  | 2.67976600  | -0.18387700 |
| C  | 0.59685500  | 2.33841400  | 1.11716600  |
| H  | -0.03089100 | 1.51769200  | 3.00944400  |
| C  | -3.77901900 | -2.58291000 | -1.08005300 |
| H  | -4.85398500 | -2.74909500 | -0.97504500 |
| H  | -3.56030600 | -2.26161400 | -2.10125000 |
| H  | -3.25949000 | -3.52628100 | -0.89218500 |
| C  | -3.83524500 | -1.88486500 | 1.73331100  |
| H  | -4.92840500 | -1.90409600 | 1.69271700  |
| H  | -3.46234100 | -2.88643500 | 1.96476500  |
| H  | -3.52152500 | -1.20167500 | 2.52569700  |
| C  | 2.13407400  | -1.25457000 | -0.39627500 |
| C  | 2.51978100  | -0.25196700 | -1.42022000 |
| H  | 1.58601900  | 0.27272100  | -1.67053000 |
| H  | 2.87037900  | -0.75759000 | -2.32553800 |
| O  | 3.52800200  | 0.63943000  | -1.01645400 |
| H  | 3.21214200  | 1.39236500  | -0.39927100 |
| C  | 1.27650200  | -1.87875900 | 0.31001200  |
| H  | 1.45330300  | -2.70832400 | 0.98441000  |
| Au | -0.78711200 | -1.41673500 | 0.14925900  |

|   |             |             |             |
|---|-------------|-------------|-------------|
| C | 1.16290600  | 3.34880500  | -1.14019500 |
| H | 0.66970300  | 4.18892400  | -1.64272600 |
| H | 1.44794500  | 2.64698300  | -1.93534900 |
| C | 2.42458100  | 3.85054000  | -0.43659300 |
| H | 2.21345700  | 4.77641600  | 0.12522100  |
| H | 3.19851800  | 4.08335500  | -1.17320800 |
| C | 2.00601300  | 2.61672500  | 1.59527500  |
| H | 2.00611500  | 3.50829800  | 2.24915500  |
| H | 2.36604500  | 1.78011200  | 2.20448700  |
| C | 4.27752500  | 3.19083600  | 0.99728900  |
| H | 4.66662900  | 2.39089200  | 1.63124600  |
| H | 4.96668700  | 3.32559700  | 0.16031400  |
| H | 4.23701700  | 4.12608500  | 1.57669500  |
| N | 2.94914200  | 2.81576900  | 0.47967400  |
| H | -1.42082200 | 2.64025200  | -1.60492700 |
| C | 4.45814400  | -1.64275100 | 0.26128900  |
| H | 4.30850300  | -1.51421700 | 1.33409300  |
| C | 4.19084400  | -2.86676700 | -0.27402100 |
| H | 4.38980200  | -3.01477200 | -1.33647400 |
| B | 5.24185900  | -0.52810200 | -0.53736300 |
| O | 6.00333700  | 0.36701500  | 0.16176600  |
| H | 6.61979000  | 0.85527900  | -0.39918000 |
| C | 3.73735700  | -4.07436300 | 0.47926800  |

|   |            |             |             |
|---|------------|-------------|-------------|
| H | 3.50603400 | -3.85112400 | 1.52500400  |
| H | 2.87270600 | -4.54934300 | -0.00009900 |
| H | 4.53924700 | -4.82489000 | 0.46910700  |
| F | 5.52970400 | -0.78002500 | -1.84687200 |

**Cartesian coordinates and energies calculated for complex B-OH-F-Int1 in gas phase.**

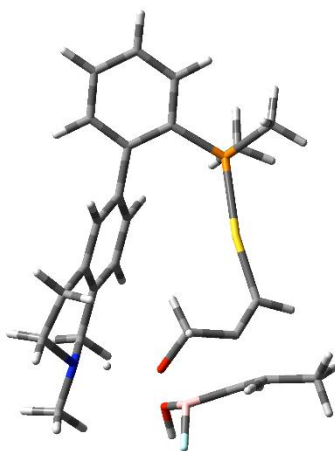

Energy = -1740.542306 (aU); Number of Imaginary Frequencies = 0

|   |             |             |             |
|---|-------------|-------------|-------------|
| P | -3.10900300 | -1.09323800 | 0.37718200  |
| C | -3.87871700 | 0.51150500  | -0.11417800 |
| C | -5.24447400 | 0.49310700  | -0.45676200 |
| C | -5.91134500 | 1.64237800  | -0.87704900 |
| C | -5.21218100 | 2.84593400  | -0.96966600 |
| C | -3.86241100 | 2.88419300  | -0.62697500 |
| C | -3.17303400 | 1.73807200  | -0.18839200 |
| H | -5.80670500 | -0.43264600 | -0.40764000 |

|   |             |             |             |
|---|-------------|-------------|-------------|
| H | -6.96506700 | 1.59271100  | -1.13315900 |
| H | -5.71426400 | 3.75100700  | -1.29759600 |
| H | -3.32425200 | 3.82608600  | -0.67422700 |
| C | -1.73816700 | 1.92370000  | 0.18124500  |
| C | -1.27061200 | 1.70317700  | 1.48795400  |
| C | -0.83871200 | 2.43085700  | -0.76551800 |
| C | 0.05461500  | 1.97377900  | 1.82001400  |
| H | -1.95155700 | 1.35024600  | 2.25574400  |
| C | 0.49497700  | 2.71285200  | -0.44250500 |
| C | 0.94640900  | 2.48115100  | 0.86561400  |
| H | 0.39987300  | 1.79319600  | 2.83469900  |
| C | -4.05925600 | -2.39099200 | -0.52748800 |
| H | -5.11195600 | -2.42118300 | -0.23570500 |
| H | -3.98515800 | -2.22463500 | -1.60501400 |
| H | -3.60747400 | -3.35914700 | -0.29535100 |
| C | -3.62263500 | -1.36131300 | 2.13108600  |
| H | -4.70597500 | -1.25010900 | 2.23583100  |
| H | -3.32980900 | -2.36949600 | 2.43775900  |
| H | -3.12647200 | -0.64244400 | 2.78653700  |
| C | 2.24083600  | -1.80891600 | -0.64630200 |
| C | 2.32820400  | -0.43390800 | -1.29214400 |
| H | 1.37723600  | 0.08858300  | -1.13846900 |
| H | 2.50401100  | -0.52106300 | -2.37411700 |



|    |             |             |             |
|----|-------------|-------------|-------------|
| O  | 3.39427000  | 0.29317700  | -0.69410000 |
| H  | 3.33115800  | 1.83866800  | -0.29023700 |
| C  | 1.11079200  | -2.33970900 | -0.08145200 |
| H  | 1.25231200  | -3.32928500 | 0.35729900  |
| Au | -0.77827400 | -1.59166000 | 0.07592300  |
| C  | 1.44029000  | 3.21474300  | -1.51741700 |
| H  | 0.96282600  | 4.00589400  | -2.10577700 |
| H  | 1.65923700  | 2.40187200  | -2.22180100 |
| C  | 2.75058000  | 3.75936700  | -0.95480400 |
| H  | 2.61433800  | 4.73916600  | -0.48502400 |
| H  | 3.50692900  | 3.85448000  | -1.73715900 |
| C  | 2.37075900  | 2.78084200  | 1.28070500  |
| H  | 2.44352100  | 3.74616800  | 1.79676500  |
| H  | 2.76319200  | 1.99397800  | 1.92947600  |
| C  | 4.68279300  | 3.21141900  | 0.50419300  |
| H  | 5.01836900  | 2.49291500  | 1.25080100  |
| H  | 5.32969400  | 3.15234200  | -0.37235200 |
| H  | 4.68223400  | 4.22778000  | 0.90479300  |
| N  | 3.29367100  | 2.83897400  | 0.09814500  |
| H  | -1.18462700 | 2.60698900  | -1.78134300 |
| C  | 3.64275200  | -2.01620100 | 0.24909000  |
| H  | 3.47724900  | -2.55448900 | 1.18222100  |
| C  | 3.53322500  | -2.76779900 | -0.96297200 |

|   |            |             |             |
|---|------------|-------------|-------------|
| H | 3.99745400 | -2.31745500 | -1.84166500 |
| B | 4.25831500 | -0.47680700 | 0.26320000  |
| O | 4.18224600 | 0.18563000  | 1.55217100  |
| H | 4.92993000 | -0.06520500 | 2.10769200  |
| C | 3.41045800 | -4.27287200 | -1.02704000 |
| H | 2.95263000 | -4.69485500 | -0.12829600 |
| H | 2.84261100 | -4.59990400 | -1.90300300 |
| H | 4.41946800 | -4.69337800 | -1.10592000 |
| F | 5.59305200 | -0.51761100 | -0.20937600 |

**Cartesian coordinates and energies calculated for TS B-OH-F-TS2 in gas phase.**

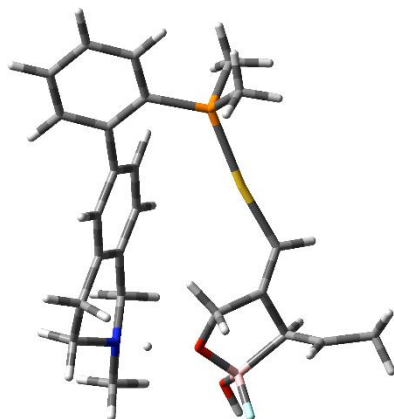

Energy = -1740.536816 (aU); Number of Imaginary Frequencies = 1(-124.6).

|   |             |             |             |
|---|-------------|-------------|-------------|
| P | -3.14799600 | -1.22860800 | 0.17067700  |
| C | -3.95399400 | 0.39594600  | -0.19515100 |

|   |             |             |             |
|---|-------------|-------------|-------------|
| C | -5.31895700 | 0.36663000  | -0.54063000 |
| C | -6.01894100 | 1.52430500  | -0.87381500 |
| C | -5.35413100 | 2.75104600  | -0.87317800 |
| C | -4.00680200 | 2.80133600  | -0.52323700 |
| C | -3.28587800 | 1.64453800  | -0.17020200 |
| H | -5.85434100 | -0.57667700 | -0.56038500 |
| H | -7.07101600 | 1.46467500  | -1.13478600 |
| H | -5.88149700 | 3.66379100  | -1.13325000 |
| H | -3.49546600 | 3.75898400  | -0.49688800 |
| C | -1.85933200 | 1.84761500  | 0.22598600  |
| C | -1.40535700 | 1.58319700  | 1.52932400  |
| C | -0.96035300 | 2.41561000  | -0.68501600 |
| C | -0.09221500 | 1.87179200  | 1.89199400  |
| H | -2.08688800 | 1.17440900  | 2.26873200  |
| C | 0.36237100  | 2.71372000  | -0.33210500 |
| C | 0.80101600  | 2.43544000  | 0.97073800  |
| H | 0.24121100  | 1.65815700  | 2.90443100  |
| C | -3.92139500 | -2.41982200 | -1.00842500 |
| H | -5.00312100 | -2.50365800 | -0.87869300 |
| H | -3.70252700 | -2.11551000 | -2.03500800 |
| H | -3.47124300 | -3.40138600 | -0.83651100 |
| C | -3.86202000 | -1.72798200 | 1.79932600  |
| H | -4.95476900 | -1.67890600 | 1.77931000  |

|    |             |             |             |
|----|-------------|-------------|-------------|
| H  | -3.54850700 | -2.75016600 | 2.02929100  |
| H  | -3.49115700 | -1.06715100 | 2.58653900  |
| C  | 2.26544400  | -1.52240600 | -0.28749900 |
| C  | 2.32450200  | -0.34803400 | -1.23581000 |
| H  | 1.37651300  | 0.19666200  | -1.22539800 |
| H  | 2.52647300  | -0.66777800 | -2.26983900 |
| O  | 3.38277400  | 0.48445700  | -0.77204000 |
| H  | 3.26837600  | 1.98144000  | -0.17911100 |
| C  | 1.18964100  | -2.13370100 | 0.24113700  |
| H  | 1.39991800  | -3.00234500 | 0.86818200  |
| Au | -0.77897900 | -1.57406000 | 0.14178300  |
| C  | 1.30837200  | 3.29117300  | -1.36655000 |
| H  | 0.80767600  | 4.07502800  | -1.94513900 |
| H  | 1.59144300  | 2.51301600  | -2.08668600 |
| C  | 2.56972000  | 3.88529400  | -0.74893500 |
| H  | 2.36448500  | 4.82947800  | -0.23338500 |
| H  | 3.33531300  | 4.06393200  | -1.50705000 |
| C  | 2.20988800  | 2.75985000  | 1.42234200  |
| H  | 2.23454900  | 3.68462100  | 2.01188300  |
| H  | 2.62295100  | 1.95442700  | 2.03509800  |
| C  | 4.49632000  | 3.40734900  | 0.73658500  |
| H  | 4.88606100  | 2.67016500  | 1.43661300  |
| H  | 5.16208400  | 3.46289700  | -0.12552400 |

|   |             |             |             |
|---|-------------|-------------|-------------|
| H | 4.39519300  | 4.39149400  | 1.19987300  |
| N | 3.15269500  | 2.94680300  | 0.26939800  |
| H | -1.29749100 | 2.62934200  | -1.69649300 |
| C | 3.74602900  | -1.81720900 | 0.19237000  |
| H | 3.81225600  | -2.05137800 | 1.25609100  |
| C | 3.85663300  | -2.92491600 | -0.66267500 |
| H | 3.82498000  | -2.73269200 | -1.73559900 |
| B | 4.51704200  | -0.32008800 | -0.25175000 |
| O | 5.07751500  | 0.35721400  | 0.87713000  |
| H | 6.01666000  | 0.15624800  | 0.96543400  |
| C | 4.04590800  | -4.34220800 | -0.26980900 |
| H | 5.04568500  | -4.64837400 | -0.61714100 |
| H | 3.98735000  | -4.49665800 | 0.80928300  |
| H | 3.33888200  | -5.00060200 | -0.78757000 |
| F | 5.46934000  | -0.59639100 | -1.25729800 |

**Cartesian coordinates and energies calculated for complex B-OH-F-Int2 in gas phase.**

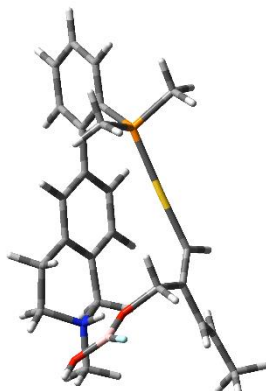

Energy = -1740.596431 (aU); Number of Imaginary Frequencies = 0

|   |            |             |             |
|---|------------|-------------|-------------|
| P | 2.88543900 | -1.21131100 | 0.66663200  |
| C | 3.97233900 | 0.23215600  | 0.25153400  |
| C | 5.35829900 | 0.09256500  | 0.45432400  |
| C | 6.25183400 | 1.11528700  | 0.13950100  |
| C | 5.76980400 | 2.31022500  | -0.39656000 |
| C | 4.39968000 | 2.47064500  | -0.59726600 |
| C | 3.48469700 | 1.45412900  | -0.27302800 |
| H | 5.75850300 | -0.83129200 | 0.85896300  |
| H | 7.31528100 | 0.97482000  | 0.30700800  |
| H | 6.45349100 | 3.11366100  | -0.65333500 |
| H | 4.01962100 | 3.40369300  | -1.00319500 |
| C | 2.03411400 | 1.73653600  | -0.50475800 |
| C | 1.51515100 | 1.76346500  | -1.81049700 |

|    |             |             |             |
|----|-------------|-------------|-------------|
| C  | 1.17446700  | 2.01941400  | 0.56107100  |
| C  | 0.16006100  | 1.99214400  | -2.02273600 |
| H  | 2.16955200  | 1.56617000  | -2.65382400 |
| C  | -0.18989800 | 2.26893600  | 0.35851400  |
| C  | -0.70380500 | 2.22018600  | -0.94345300 |
| H  | -0.23451100 | 1.96426800  | -3.03548000 |
| C  | 2.90154700  | -1.26175100 | 2.51381500  |
| H  | 3.92554300  | -1.25812000 | 2.89910600  |
| H  | 2.36927300  | -0.39519600 | 2.91387700  |
| H  | 2.39150800  | -2.16903100 | 2.85017900  |
| C  | 3.87528400  | -2.69879100 | 0.20516700  |
| H  | 4.81711300  | -2.77153900 | 0.75492700  |
| H  | 3.27173000  | -3.58360000 | 0.42585600  |
| H  | 4.08202700  | -2.68419300 | -0.86787800 |
| C  | -2.40401700 | -1.52122100 | -0.61278000 |
| C  | -2.59864800 | -1.53804800 | 0.87798900  |
| H  | -1.63903300 | -1.57464200 | 1.39546700  |
| H  | -3.22000600 | -2.38062100 | 1.19688300  |
| O  | -3.28279500 | -0.29967500 | 1.31617800  |
| C  | -1.16041700 | -1.53638700 | -1.15311900 |
| H  | -1.13793400 | -1.64435100 | -2.24088600 |
| Au | 0.68215500  | -1.36858700 | -0.27466400 |
| C  | -1.09837500 | 2.52939000  | 1.54429400  |

|   |             |             |             |
|---|-------------|-------------|-------------|
| H | -0.63706100 | 3.25154100  | 2.22684600  |
| H | -1.23545700 | 1.60433200  | 2.11852400  |
| C | -2.46451600 | 3.07146500  | 1.13687200  |
| H | -2.40781600 | 4.10056400  | 0.76903100  |
| H | -3.17850900 | 3.02138200  | 1.96043800  |
| C | -2.17985600 | 2.38892700  | -1.22697000 |
| H | -2.40865200 | 3.37906400  | -1.63860700 |
| H | -2.52686900 | 1.63293000  | -1.93623300 |
| C | -4.46271500 | 2.55698700  | -0.27025100 |
| H | -4.80450700 | 1.92560500  | -1.09167300 |
| H | -5.04069300 | 2.34485300  | 0.62896000  |
| H | -4.54756000 | 3.61075200  | -0.54179100 |
| N | -3.02569800 | 2.24006400  | 0.00884300  |
| H | 1.57169600  | 2.04255700  | 1.57311200  |
| C | -3.85111000 | -1.15731700 | -2.65972600 |
| H | -3.01622200 | -0.69646700 | -3.19126600 |
| B | -4.15273100 | -0.28210100 | 2.35936600  |
| O | -4.71096600 | 0.92160500  | 2.69466000  |
| H | -5.32328700 | 0.86932700  | 3.44007500  |
| C | -5.12290400 | -1.32201100 | -3.44152300 |
| H | -5.91578700 | -1.77055600 | -2.83484100 |
| H | -5.48812100 | -0.36307300 | -3.83184100 |
| H | -4.96228700 | -1.96829100 | -4.31422600 |



|   |             |             |             |
|---|-------------|-------------|-------------|
| C | -3.66107100 | -1.58033700 | -1.39651100 |
| H | -4.51809300 | -2.02154500 | -0.88086000 |
| H | -2.99749900 | 1.24800600  | 0.32796700  |
| F | -4.46480700 | -1.39309900 | 3.04654100  |

Energies for these structures computed as a single point in DCM using differentiated basis set (6-31+G(d,p) for C, H, O, N, F, P and B; def2-TZVP<sup>[26]</sup> for Au) were reported below.

| Compound Name      | Energy (aU)  | $\Delta G$ and $\Delta G^\ddagger$                 |
|--------------------|--------------|----------------------------------------------------|
| <b>B-OH-F</b>      | -1740.897698 |                                                    |
| <b>B-OH-F-TS1</b>  | -1740.873480 | $\Delta G^\ddagger = 15.2$ kcal/mol                |
| <b>B-OH-F-Int1</b> | -1740.923618 | $\Delta G^{\text{CPX-PROD}} = 16.3$ kcal/mol       |
| <b>B-OH-F-TS2</b>  | -1740.917418 | $\Delta G^\ddagger = 3.9$ kcal/mol                 |
| <b>B-OH-F-Int2</b> | -1740.976635 | $\Delta G^{\text{PROD-PROD-REAL}} = 33.3$ kcal/mol |

**Pathway I, B(OH)<sub>2</sub> moiety, in gas phase.**

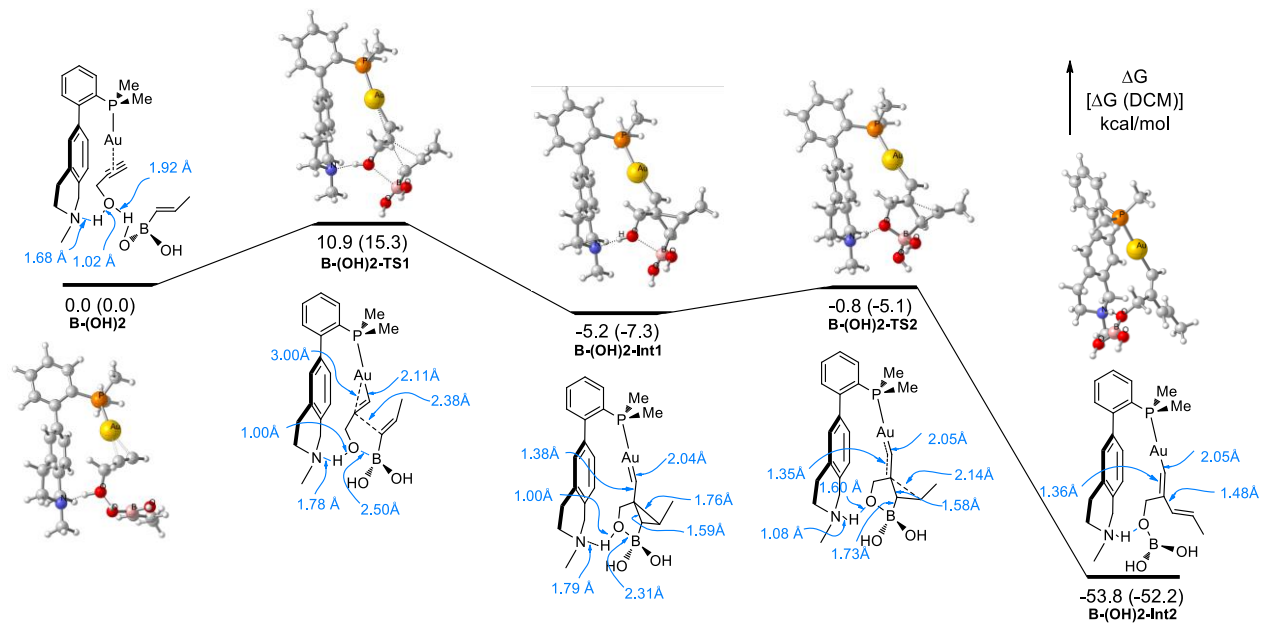

**Figure 1.** Reaction pathway modeled.

**Cartesian coordinates and energies calculated for complex B-(OH)<sub>2</sub> in gas phase.**

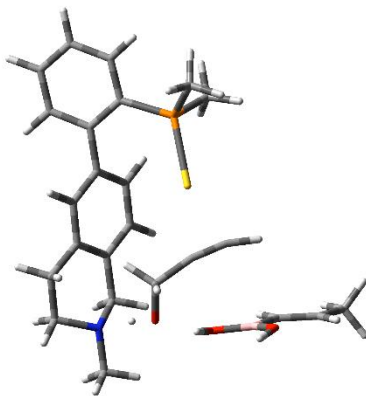

Energy = -1716.485291 (aU); Number of Imaginary Frequencies = 0

P            -2.75253500   -1.71707800   0.02812200

|   |             |             |             |
|---|-------------|-------------|-------------|
| C | -3.86669500 | -0.34431700 | 0.52425300  |
| C | -5.24670500 | -0.62917500 | 0.52657500  |
| C | -6.18837700 | 0.34213400  | 0.85814800  |
| C | -5.75932100 | 1.62869300  | 1.18785000  |
| C | -4.39743100 | 1.92171300  | 1.19681700  |
| C | -3.42522000 | 0.95489400  | 0.88012800  |
| H | -5.60442500 | -1.61777700 | 0.25966700  |
| H | -7.24504600 | 0.09424900  | 0.85324500  |
| H | -6.48012200 | 2.39849200  | 1.44582400  |
| H | -4.06406500 | 2.91599900  | 1.47747700  |
| C | -1.99607200 | 1.37751100  | 0.95232200  |
| C | -1.09219000 | 0.78816800  | 1.85427800  |
| C | -1.54717300 | 2.44944800  | 0.16810800  |
| C | 0.22284400  | 1.24308000  | 1.93129600  |
| H | -1.42605600 | -0.00347300 | 2.51843900  |
| C | -0.22945600 | 2.92236500  | 0.24582600  |
| C | 0.67097200  | 2.30012700  | 1.12674800  |
| H | 0.91282000  | 0.77311200  | 2.62759000  |
| C | -3.66547700 | -2.72165600 | -1.21460400 |
| H | -4.57005400 | -3.16760400 | -0.79401100 |
| H | -3.93102200 | -2.10069700 | -2.07339100 |
| H | -3.00686900 | -3.52553200 | -1.55369700 |

|    |             |             |             |
|----|-------------|-------------|-------------|
| C  | -2.60663300 | -2.83692600 | 1.48217500  |
| H  | -3.60411800 | -3.10182800 | 1.84557800  |
| H  | -2.07285000 | -3.74554400 | 1.19031300  |
| H  | -2.05375800 | -2.34509900 | 2.28472600  |
| C  | 1.39067300  | -0.40816900 | -1.90806400 |
| C  | 1.56512400  | 0.98523000  | -2.39948800 |
| H  | 0.68034500  | 1.57785000  | -2.14172400 |
| H  | 1.61964200  | 0.93367200  | -3.49554100 |
| O  | 2.75245600  | 1.54538000  | -1.89366100 |
| H  | 2.56576100  | 2.29262200  | -1.22080500 |
| C  | 1.49408600  | -1.58262100 | -1.55391900 |
| H  | 1.85517500  | -2.57385400 | -1.35771900 |
| Au | -0.63117800 | -1.20906900 | -0.82912700 |
| C  | 0.21520100  | 4.08126900  | -0.62795800 |
| H  | -0.50041800 | 4.90750700  | -0.54232300 |
| H  | 0.19109800  | 3.77600600  | -1.68318000 |
| C  | 1.61705600  | 4.58988700  | -0.27889000 |
| H  | 1.57819200  | 5.25167200  | 0.60301700  |
| H  | 2.02063200  | 5.17723400  | -1.10857500 |
| C  | 2.10770600  | 2.76509000  | 1.22009900  |
| H  | 2.22874600  | 3.43651900  | 2.08990500  |
| H  | 2.77122100  | 1.90840500  | 1.37275600  |
| C  | 3.92736800  | 3.91701300  | 0.10696800  |

|   |             |             |             |
|---|-------------|-------------|-------------|
| H | 4.57310600  | 3.06004500  | 0.31409300  |
| H | 4.24106600  | 4.37542700  | -0.83453200 |
| H | 4.04653500  | 4.65334300  | 0.91647300  |
| N | 2.52967500  | 3.46036800  | -0.01203800 |
| H | -2.23994400 | 2.92648400  | -0.52187800 |
| C | 4.96455600  | -1.77220600 | 1.50792600  |
| H | 4.77669900  | -1.22573500 | 2.43462600  |
| C | 5.49256300  | -3.00771000 | 1.60107200  |
| H | 5.69809500  | -3.55222300 | 0.67767100  |
| B | 4.64205600  | -1.07304100 | 0.16013500  |
| O | 4.19607000  | 0.22840600  | 0.17954800  |
| H | 3.87675700  | 0.58574200  | -0.66956100 |
| O | 4.77761700  | -1.78758500 | -1.01961700 |
| H | 4.74272400  | -1.25699800 | -1.82436100 |
| C | 5.85053200  | -3.72060800 | 2.87075200  |
| H | 5.61533300  | -3.12171600 | 3.75586600  |
| H | 5.31973600  | -4.67876500 | 2.94586100  |
| H | 6.92140100  | -3.96129600 | 2.89033200  |

**Cartesian coordinates and energies calculated for TS B-(OH)<sub>2</sub>-TS1 in gas phase.**

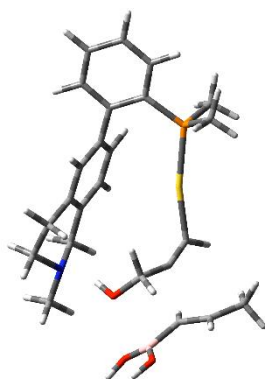

Energy = -1716.467936 (aU); Number of Imaginary Frequencies = 1(-166.05).

|   |             |             |             |
|---|-------------|-------------|-------------|
| P | -3.04985000 | -1.42602600 | 0.00214500  |
| C | -4.05702800 | 0.09686500  | -0.24244100 |
| C | -5.40658400 | -0.08867100 | -0.60142000 |
| C | -6.24676600 | 0.99273700  | -0.85580500 |
| C | -5.74190700 | 2.29130000  | -0.76162800 |
| C | -4.41216800 | 2.49030300  | -0.39683100 |
| C | -3.55107100 | 1.41270900  | -0.11996200 |
| H | -5.81615000 | -1.08983600 | -0.69308500 |
| H | -7.28307200 | 0.82046000  | -1.12925500 |
| H | -6.38242400 | 3.14485700  | -0.96178800 |
| H | -4.02412500 | 3.49988000  | -0.30099500 |
| C | -2.15529400 | 1.73614800  | 0.29771600  |
| C | -1.70548200 | 1.48398400  | 1.60524500  |
| C | -1.28346300 | 2.36429300  | -0.59870100 |

|    |             |             |             |
|----|-------------|-------------|-------------|
| C  | -0.40604700 | 1.82303100  | 1.97597400  |
| H  | -2.37732500 | 1.03954000  | 2.33395200  |
| C  | 0.02504500  | 2.71217200  | -0.23463600 |
| C  | 0.47346600  | 2.42109100  | 1.06319700  |
| H  | -0.06836700 | 1.61819400  | 2.98924400  |
| C  | -3.52472100 | -2.55561700 | -1.37514000 |
| H  | -4.59521400 | -2.77517500 | -1.37911000 |
| H  | -3.24754400 | -2.10306000 | -2.33035000 |
| H  | -2.97259300 | -3.49218200 | -1.25925300 |
| C  | -3.75797300 | -2.23270800 | 1.50153500  |
| H  | -4.84093400 | -2.35025800 | 1.40113300  |
| H  | -3.29784600 | -3.21538700 | 1.63668700  |
| H  | -3.54824900 | -1.62233800 | 2.38316800  |
| C  | 2.26307500  | -1.19540700 | -0.36254900 |
| C  | 2.61322100  | -0.28651400 | -1.48618300 |
| H  | 1.63934300  | 0.08105800  | -1.84900800 |
| H  | 3.07405500  | -0.85650300 | -2.29852600 |
| O  | 3.49344700  | 0.75446500  | -1.16126500 |
| H  | 3.09299100  | 1.45790700  | -0.56601500 |
| C  | 1.37582600  | -1.71444800 | 0.40354000  |
| H  | 1.56531300  | -2.45235200 | 1.17470200  |
| Au | -0.69024800 | -1.35526100 | 0.16110700  |
| C  | 0.94518100  | 3.37932300  | -1.23794200 |

|   |             |             |             |
|---|-------------|-------------|-------------|
| H | 0.41002100  | 4.17941600  | -1.76262600 |
| H | 1.23998300  | 2.65266200  | -2.00706700 |
| C | 2.20329500  | 3.95005500  | -0.58251600 |
| H | 1.97064100  | 4.88630400  | -0.04486100 |
| H | 2.94888200  | 4.18828100  | -1.34651500 |
| C | 1.88414300  | 2.76412000  | 1.49231400  |
| H | 1.86819100  | 3.67414800  | 2.12210800  |
| H | 2.29045500  | 1.95869700  | 2.11441900  |
| C | 4.11867600  | 3.37268900  | 0.80449000  |
| H | 4.54308800  | 2.59599400  | 1.44591200  |
| H | 4.77546000  | 3.49897700  | -0.06038500 |
| H | 4.08663900  | 4.32238500  | 1.36275400  |
| N | 2.78398300  | 2.96062200  | 0.34476700  |
| H | -1.62810700 | 2.58329600  | -1.60704000 |
| C | 4.48066000  | -1.63586600 | 0.37133000  |
| H | 4.29349500  | -1.48605500 | 1.43497000  |
| C | 4.17281800  | -2.85378300 | -0.16495900 |
| H | 4.41145200  | -3.01693400 | -1.21667500 |
| B | 5.42782700  | -0.61308700 | -0.37484300 |
| O | 6.01942400  | 0.34731700  | 0.40497900  |
| H | 6.69568400  | 0.88713500  | -0.02050200 |
| O | 5.75966800  | -0.92284900 | -1.67171900 |
| H | 6.32186100  | -0.29681600 | -2.14148900 |



|   |            |             |            |
|---|------------|-------------|------------|
| C | 3.64669200 | -4.03823800 | 0.57592500 |
| H | 3.38227700 | -3.80380100 | 1.61094100 |
| H | 2.79033800 | -4.49216400 | 0.06427100 |
| H | 4.43024600 | -4.80809600 | 0.60223800 |

**Cartesian coordinates and energies calculated for complex B-(OH)<sub>2</sub>-int1 in gas phase.**

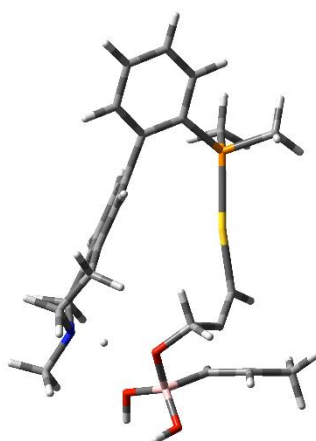

Energy = -1716.493605 (aU); Number of Imaginary Frequencies = 0

|   |             |             |             |
|---|-------------|-------------|-------------|
| P | -3.04268200 | -1.31197700 | 0.17386600  |
| C | -3.96805300 | 0.21848400  | -0.27600000 |
| C | -5.30672000 | 0.06357100  | -0.68505800 |
| C | -6.07979500 | 1.15325200  | -1.07986600 |
| C | -5.51690600 | 2.43080800  | -1.07771800 |
| C | -4.19712300 | 2.60184700  | -0.66629800 |
| C | -3.40315500 | 1.51694000  | -0.25008400 |
| H | -5.76153600 | -0.92138000 | -0.70694200 |

|   |             |             |             |
|---|-------------|-------------|-------------|
| H | -7.10937500 | 1.00256400  | -1.38920100 |
| H | -6.10448100 | 3.29058100  | -1.38505600 |
| H | -3.76607500 | 3.59811900  | -0.64086200 |
| C | -2.01338200 | 1.81762000  | 0.19997200  |
| C | -1.59138200 | 1.56390700  | 1.51672700  |
| C | -1.11256700 | 2.43013400  | -0.67994200 |
| C | -0.29484900 | 1.88697800  | 1.91289600  |
| H | -2.28444700 | 1.13994300  | 2.23739500  |
| C | 0.19157300  | 2.76477100  | -0.29045600 |
| C | 0.60984000  | 2.47336900  | 1.01761800  |
| H | 0.01836200  | 1.68312100  | 2.93422800  |
| C | -3.63663600 | -2.60850200 | -0.99672600 |
| H | -4.71009200 | -2.79170400 | -0.90642400 |
| H | -3.40645700 | -2.31222900 | -2.02311900 |
| H | -3.10447600 | -3.53753700 | -0.77482300 |
| C | -3.76117400 | -1.83993200 | 1.79022000  |
| H | -4.85204500 | -1.89169600 | 1.72685100  |
| H | -3.36603000 | -2.82359500 | 2.05909500  |
| H | -3.48578300 | -1.12756200 | 2.57144000  |
| C | 2.44069800  | -1.39027000 | -0.28476400 |
| C | 2.39425300  | -0.26737600 | -1.32307500 |
| H | 1.41596700  | 0.21929900  | -1.25037600 |
| H | 2.49837600  | -0.66891500 | -2.33772900 |

|    |             |             |             |
|----|-------------|-------------|-------------|
| O  | 3.45340000  | 0.65240200  | -1.12456000 |
| H  | 3.18622200  | 1.41861500  | -0.53386100 |
| C  | 1.34054500  | -1.84237800 | 0.40804500  |
| H  | 1.56633300  | -2.63168400 | 1.12794800  |
| Au | -0.64116800 | -1.40332600 | 0.25577100  |
| C  | 1.14143400  | 3.41064000  | -1.28005600 |
| H  | 0.63278500  | 4.22412700  | -1.81047200 |
| H  | 1.42686300  | 2.67675400  | -2.04509100 |
| C  | 2.40535300  | 3.95174400  | -0.60956100 |
| H  | 2.19261100  | 4.90162100  | -0.08772000 |
| H  | 3.16997000  | 4.15783100  | -1.36413900 |
| C  | 2.01508700  | 2.80346200  | 1.47349200  |
| H  | 1.99943700  | 3.72768500  | 2.08236400  |
| H  | 2.39468700  | 2.00612100  | 2.12226300  |
| C  | 4.27627800  | 3.34858300  | 0.82370500  |
| H  | 4.65667500  | 2.57978600  | 1.50131100  |
| H  | 4.95882100  | 3.43227800  | -0.02682800 |
| H  | 4.25854000  | 4.31497500  | 1.35339500  |
| N  | 2.94310300  | 2.96020900  | 0.34186800  |
| H  | -1.43106300 | 2.64477100  | -1.69763600 |
| C  | 3.91150400  | -1.77181700 | 0.19951600  |
| H  | 3.92721600  | -2.04888800 | 1.25344600  |
| C  | 3.42941600  | -2.78040800 | -0.70391100 |

|   |            |             |             |
|---|------------|-------------|-------------|
| H | 3.61918700 | -2.60774200 | -1.76201600 |
| B | 5.06646800 | -0.75489900 | -0.25763600 |
| O | 5.58499000 | 0.04546900  | 0.73016000  |
| H | 6.40225900 | 0.50908100  | 0.51329800  |
| O | 5.65775400 | -1.04598200 | -1.46235100 |
| H | 6.32284300 | -0.42781700 | -1.78602000 |
| C | 3.11193400 | -4.20376000 | -0.34256000 |
| H | 2.91886300 | -4.34491600 | 0.72287200  |
| H | 2.28192600 | -4.61105400 | -0.92553200 |
| H | 4.00618100 | -4.79024800 | -0.59350500 |

**Cartesian coordinates and energies calculated for TS B-(OH)<sub>2</sub>-TS2 in gas phase.**

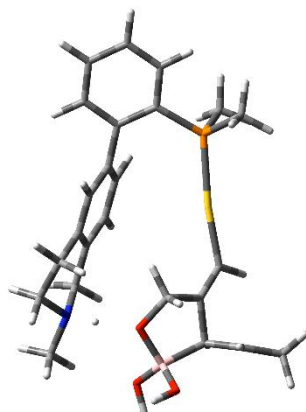

Energy = -1716.500687 (aU); Number of Imaginary Frequencies = 1(-107.61).

|   |             |             |             |
|---|-------------|-------------|-------------|
| P | -3.13804900 | -1.24852300 | 0.12092700  |
| C | -3.96334900 | 0.37014900  | -0.23042200 |
| C | -5.32307800 | 0.32772000  | -0.59417800 |

|   |             |             |             |
|---|-------------|-------------|-------------|
| C | -6.03411200 | 1.48124400  | -0.91836400 |
| C | -5.38603500 | 2.71674900  | -0.88974800 |
| C | -4.04404900 | 2.77989200  | -0.52153800 |
| C | -3.31297600 | 1.62716900  | -0.17718100 |
| H | -5.84513800 | -0.62250000 | -0.63511300 |
| H | -7.08187400 | 1.41199300  | -1.19395200 |
| H | -5.92264800 | 3.62620000  | -1.14238100 |
| H | -3.54566800 | 3.74357200  | -0.47391900 |
| C | -1.89351100 | 1.83567600  | 0.23974100  |
| C | -1.45577700 | 1.55247100  | 1.54475600  |
| C | -0.98307200 | 2.41226100  | -0.65375200 |
| C | -0.14329600 | 1.82165200  | 1.92272300  |
| H | -2.14818400 | 1.13849600  | 2.27107200  |
| C | 0.33927700  | 2.69234900  | -0.28458300 |
| C | 0.76459000  | 2.38484000  | 1.01565200  |
| H | 0.17933500  | 1.58886000  | 2.93446600  |
| C | -3.85187400 | -2.42168800 | -1.11272000 |
| H | -4.93631400 | -2.52259700 | -1.02347800 |
| H | -3.60168600 | -2.08931000 | -2.12330500 |
| H | -3.39395600 | -3.40104000 | -0.94882600 |
| C | -3.89726600 | -1.79932300 | 1.71217200  |
| H | -4.98947400 | -1.77162200 | 1.65586600  |
| H | -3.57080600 | -2.81997000 | 1.93066800  |

|    |             |             |             |
|----|-------------|-------------|-------------|
| H  | -3.56701800 | -1.14876000 | 2.52575400  |
| C  | 2.28944300  | -1.45041900 | -0.24545800 |
| C  | 2.32862600  | -0.32738400 | -1.25909400 |
| H  | 1.38255000  | 0.22109200  | -1.25706000 |
| H  | 2.50412400  | -0.70966400 | -2.27622700 |
| O  | 3.40407100  | 0.52236200  | -0.87150100 |
| H  | 3.26268200  | 1.94216300  | -0.13949800 |
| C  | 1.21930500  | -2.03969300 | 0.32294200  |
| H  | 1.44177900  | -2.86724800 | 0.99953600  |
| Au | -0.76012600 | -1.53767400 | 0.16946300  |
| C  | 1.29977900  | 3.28305100  | -1.29738900 |
| H  | 0.80933900  | 4.08003200  | -1.86683000 |
| H  | 1.58992800  | 2.51704600  | -2.02731000 |
| C  | 2.55471900  | 3.86010700  | -0.65135200 |
| H  | 2.34332300  | 4.79021100  | -0.11288600 |
| H  | 3.32724700  | 4.05997000  | -1.39699600 |
| C  | 2.17559700  | 2.67422900  | 1.48246500  |
| H  | 2.20722600  | 3.57448100  | 2.10850500  |
| H  | 2.57348000  | 1.84167100  | 2.06872900  |
| C  | 4.45999600  | 3.35804100  | 0.84829200  |
| H  | 4.85603500  | 2.60304900  | 1.52485500  |
| H  | 5.13779800  | 3.45336300  | -0.00012100 |
| H  | 4.33553600  | 4.32347200  | 1.34456000  |

|   |             |             |             |
|---|-------------|-------------|-------------|
| N | 3.13019600  | 2.89477500  | 0.34570000  |
| H | -1.30909900 | 2.64371900  | -1.66496500 |
| C | 3.77993300  | -1.72165000 | 0.21501200  |
| H | 3.87301400  | -1.85508300 | 1.29423600  |
| C | 3.82247800  | -2.90784000 | -0.53864500 |
| H | 3.79668100  | -2.80032100 | -1.62239400 |
| B | 4.57301600  | -0.32638900 | -0.43132300 |
| O | 5.26012600  | 0.44129700  | 0.58036700  |
| H | 6.17257800  | 0.14217200  | 0.66588200  |
| O | 5.38469400  | -0.80972600 | -1.52410000 |
| H | 5.76166600  | -0.08727800 | -2.04087100 |
| C | 3.95825900  | -4.29170900 | -0.02369400 |
| H | 3.85309100  | -4.35781700 | 1.06116000  |
| H | 3.26603000  | -4.98102900 | -0.51896100 |
| H | 4.96988900  | -4.63356400 | -0.29691500 |

**Cartesian coordinates and energies calculated for complex B-(OH)<sub>2</sub>-Int2 in gas phase.**

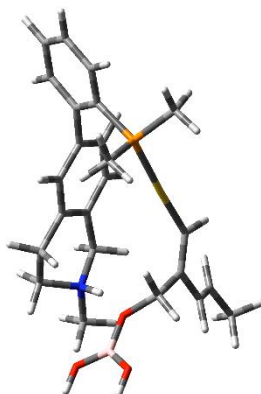

Energy = -1716.571007 (aU); Number of Imaginary Frequencies = 0

|   |            |             |             |
|---|------------|-------------|-------------|
| P | 2.91010600 | -1.21039300 | 0.63846300  |
| C | 3.97168600 | 0.26124400  | 0.25448800  |
| C | 5.35522900 | 0.14986700  | 0.48977900  |
| C | 6.23433200 | 1.19243900  | 0.20134700  |
| C | 5.73966700 | 2.38002300  | -0.33995000 |
| C | 4.37150300 | 2.51300500  | -0.57145100 |
| C | 3.47079900 | 1.47539400  | -0.27476200 |
| H | 5.76447500 | -0.76739700 | 0.90097100  |
| H | 7.29626500 | 1.07364100  | 0.39358000  |
| H | 6.41214300 | 3.19896500  | -0.57669900 |
| H | 3.98132300 | 3.43998500  | -0.98165400 |
| C | 2.01914300 | 1.73055800  | -0.53371400 |
| C | 1.50940800 | 1.69432000  | -1.84255100 |



|    |             |             |             |
|----|-------------|-------------|-------------|
| C  | 1.14964900  | 2.05113800  | 0.51293300  |
| C  | 0.15305900  | 1.89784400  | -2.07288700 |
| H  | 2.17175900  | 1.46844600  | -2.67244600 |
| C  | -0.21596900 | 2.27612300  | 0.29094000  |
| C  | -0.72090200 | 2.16228400  | -1.01013500 |
| H  | -0.23463200 | 1.81969000  | -3.08565900 |
| C  | 2.96988100  | -1.32690300 | 2.48144200  |
| H  | 4.00166300  | -1.32963200 | 2.84534600  |
| H  | 2.43999300  | -0.47929600 | 2.92303700  |
| H  | 2.47293500  | -2.24929200 | 2.79545700  |
| C  | 3.91522900  | -2.66198400 | 0.09957000  |
| H  | 4.87673800  | -2.72797200 | 0.61511700  |
| H  | 3.33920700  | -3.56707200 | 0.31147800  |
| H  | 4.08597700  | -2.60891500 | -0.97862400 |
| C  | -2.40168300 | -1.52369100 | -0.54906300 |
| C  | -2.58277500 | -1.47620900 | 0.94451000  |
| H  | -1.61629100 | -1.48134400 | 1.45170700  |
| H  | -3.18385300 | -2.31686800 | 1.30362100  |
| O  | -3.28208000 | -0.23875300 | 1.33557400  |
| C  | -1.16583500 | -1.57160900 | -1.10444800 |
| H  | -1.15710500 | -1.72891900 | -2.18647000 |
| Au | 0.68853000  | -1.38011200 | -0.25659100 |
| C  | -1.13420100 | 2.58373600  | 1.45713400  |

|   |             |             |             |
|---|-------------|-------------|-------------|
| H | -0.68101500 | 3.33817900  | 2.10959900  |
| H | -1.27221600 | 1.68447500  | 2.07039000  |
| C | -2.49970900 | 3.09927300  | 1.01459700  |
| H | -2.44458900 | 4.10921200  | 0.59638300  |
| H | -3.21796100 | 3.08528900  | 1.83556200  |
| C | -2.19779100 | 2.29572500  | -1.30844400 |
| H | -2.43467900 | 3.25730400  | -1.77922900 |
| H | -2.53150800 | 1.49550800  | -1.97419000 |
| C | -4.48484800 | 2.50472500  | -0.37706000 |
| H | -4.81651700 | 1.83170500  | -1.16908200 |
| H | -5.06765400 | 2.33139000  | 0.52718700  |
| H | -4.57343800 | 3.54358200  | -0.70052500 |
| N | -3.04965700 | 2.20857800  | -0.07161400 |
| H | 1.53971600  | 2.12159100  | 1.52558200  |
| C | -3.86928000 | -1.24380000 | -2.59601000 |
| H | -3.03791500 | -0.81428800 | -3.15848300 |
| B | -4.12706300 | -0.19683500 | 2.41474700  |
| O | -4.68210400 | 1.04968100  | 2.65137000  |
| H | -5.28346300 | 1.11286200  | 3.40144200  |
| C | -5.15218700 | -1.43344200 | -3.35422900 |
| H | -5.94068700 | -1.84725300 | -2.71772100 |
| H | -5.51536300 | -0.49017300 | -3.78309800 |
| H | -5.00843300 | -2.11989700 | -4.19881300 |

|   |             |             |             |
|---|-------------|-------------|-------------|
| C | -3.66711200 | -1.61000800 | -1.31690800 |
| H | -4.52136400 | -2.01923300 | -0.77136100 |
| H | -3.02462800 | 1.23275200  | 0.30469000  |
| O | -4.35095400 | -1.32718700 | 3.14858200  |
| H | -4.96407000 | -1.27842500 | 3.88927000  |

**Energies for these structures computed as a single point in DCM using differentiated basis set (6-31+G(d,p) for C, H, O, N, P and B; def2-TZVP<sup>[26]</sup> for Au) were reported below.**

| Compound Name             | Energy (aU)  | $\Delta G$ and $\Delta G^\ddagger$ (for TSs)         |
|---------------------------|--------------|------------------------------------------------------|
| B-(OH) <sub>2</sub>       | -1716.869283 |                                                      |
| B-(OH) <sub>2</sub> -TS1  | -1716.844895 | $\Delta G^\ddagger = 15.3$ kcal/mol                  |
| B-(OH) <sub>2</sub> -Int1 | -1716.880957 | $\Delta G^{\text{CPX-INTERM}} = 7.3$ kcal/mol        |
| B-(OH) <sub>2</sub> -TS2  | -1716.879067 | $\Delta G^\ddagger = 1.18$ kcal/mol                  |
| B-(OH) <sub>2</sub> -Int2 | -1716.952507 | $\Delta G^{\text{INTERM-PROD-REAL}} = 44.9$ kcal/mol |

Pathway for L3, B(F)OH moiety, *in gas phase* and in DCM as a solvent.

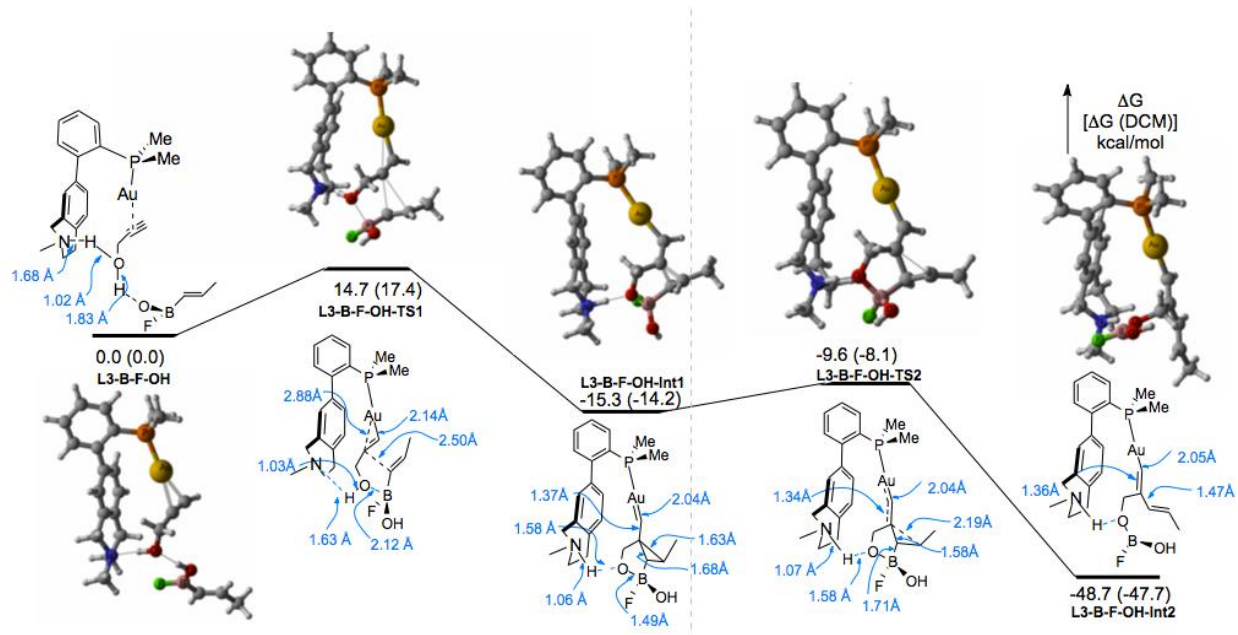

Figure 1. Reaction pathway modeled.

Cartesian coordinates and energies calculated for complex L3-B-F-OH in gas phase.

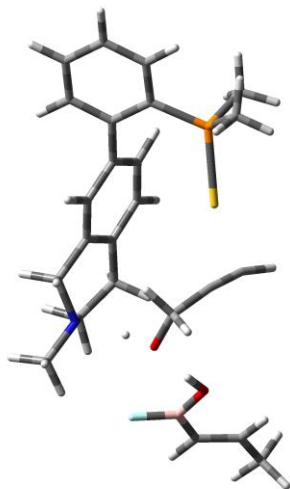

Energy = -1740.516199 (aU); Number of Imaginary Frequencies = 0.

P            -3.34836900   -1.52421600   0.13634700

C            -4.23883300   0.08118900   0.18145600

|   |             |             |             |
|---|-------------|-------------|-------------|
| C | -5.62700200 | 0.03889100  | -0.05639900 |
| C | -6.39482200 | 1.20101400  | -0.07821800 |
| C | -5.77765400 | 2.43549800  | 0.12994900  |
| C | -4.40686000 | 2.49060400  | 0.37438300  |
| C | -3.61262000 | 1.33039800  | 0.41811900  |
| H | -6.12612400 | -0.90752700 | -0.23529300 |
| H | -7.46281400 | 1.13955900  | -0.26169900 |
| H | -6.36116600 | 3.35085100  | 0.11130900  |
| H | -3.93154700 | 3.44899400  | 0.55970000  |
| C | -2.16165200 | 1.50595800  | 0.72229200  |
| C | -1.58946000 | 1.01537300  | 1.90897500  |
| C | -1.34924700 | 2.24601200  | -0.14837700 |
| C | -0.24004600 | 1.23356900  | 2.18392400  |
| H | -2.20813400 | 0.49089300  | 2.63161200  |
| C | 0.00590000  | 2.47192700  | 0.12602100  |
| C | 0.57917200  | 1.94764000  | 1.29730100  |
| H | 0.18563700  | 0.85077000  | 3.10839700  |
| C | -4.19349300 | -2.56993500 | -1.11884200 |
| H | -5.22936000 | -2.78107300 | -0.84214100 |
| H | -4.17144000 | -2.07308600 | -2.09164500 |
| H | -3.65297500 | -3.51695200 | -1.19585700 |
| C | -3.69429500 | -2.36652600 | 1.73597600  |
| H | -4.77382800 | -2.39854700 | 1.91130200  |

|    |             |             |             |
|----|-------------|-------------|-------------|
| H  | -3.30045900 | -3.38619600 | 1.70677800  |
| H  | -3.21654200 | -1.82534200 | 2.55516000  |
| C  | 1.22282700  | -1.16568500 | -1.09892800 |
| C  | 1.55601500  | -0.14126600 | -2.12766700 |
| H  | 0.69721000  | 0.52492700  | -2.27284000 |
| H  | 1.72467900  | -0.67281800 | -3.07285500 |
| O  | 2.72298200  | 0.55689000  | -1.78187300 |
| H  | 2.51746900  | 1.44299200  | -1.31686200 |
| C  | 1.16267400  | -2.05268900 | -0.24782000 |
| H  | 1.39685400  | -2.84947600 | 0.43048200  |
| Au | -1.04334900 | -1.48707300 | -0.27781700 |
| C  | 0.83514000  | 3.31494500  | -0.82237100 |
| H  | 0.67012700  | 4.38561800  | -0.59953300 |
| H  | 0.50874100  | 3.15894700  | -1.85700000 |
| C  | 2.05794500  | 2.11913000  | 1.57554200  |
| H  | 2.21558600  | 2.39770900  | 2.62376300  |
| H  | 2.56063100  | 1.15323800  | 1.43696600  |
| H  | -1.78318200 | 2.64962500  | -1.06089400 |
| C  | 6.94965800  | -0.77296700 | 0.79398600  |
| H  | 7.49837500  | -0.15975800 | 1.51068000  |
| C  | 7.40010600  | -2.01808900 | 0.54476400  |
| H  | 6.85646700  | -2.62878500 | -0.17842600 |
| B  | 5.70768600  | -0.17366200 | 0.09852800  |

|   |            |             |             |
|---|------------|-------------|-------------|
| O | 4.92959300 | -0.85509100 | -0.77482200 |
| H | 4.19981800 | -0.32662700 | -1.15788900 |
| C | 8.60304000 | -2.65903700 | 1.16706300  |
| H | 9.09638500 | -1.99405200 | 1.88188600  |
| H | 8.32589500 | -3.58597800 | 1.68597100  |
| H | 9.33132700 | -2.94384100 | 0.39660600  |
| C | 2.72202500 | 3.15832800  | 0.67097200  |
| H | 2.48730800 | 4.18012300  | 1.01535200  |
| H | 3.80614400 | 3.03279500  | 0.69970400  |
| N | 2.27027300 | 2.99643000  | -0.72991000 |
| C | 3.05514900 | 3.85263000  | -1.63730900 |
| H | 4.10805900 | 3.56679500  | -1.58116200 |
| H | 2.71131300 | 3.71185500  | -2.66594600 |
| H | 2.96107800 | 4.91795800  | -1.37606700 |
| F | 5.35285000 | 1.12065200  | 0.38936900  |

**Cartesian coordinates and energies calculated for TS L3-FOH-TS-I in gas phase.**

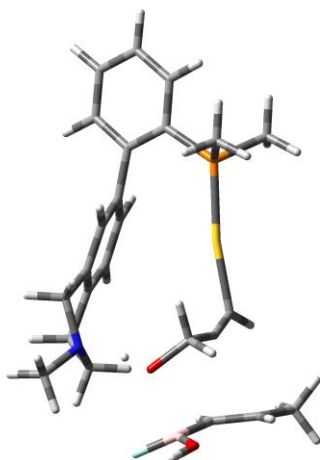

Energy = -1740.492768 (aU); Number of Imaginary Frequencies = 1(-170.80).

|   |             |             |             |
|---|-------------|-------------|-------------|
| P | -3.14018500 | -1.29014300 | 0.18193600  |
| C | -3.88049700 | 0.22111300  | -0.56000300 |
| C | -5.09103100 | 0.07688900  | -1.26496400 |
| C | -5.69932400 | 1.16172200  | -1.89430500 |
| C | -5.09487800 | 2.41777500  | -1.83578400 |
| C | -3.89924500 | 2.57634800  | -1.13700600 |
| C | -3.27444900 | 1.50022500  | -0.48209100 |
| H | -5.57173100 | -0.89213200 | -1.33824300 |
| H | -6.63332100 | 1.02125100  | -2.42922900 |
| H | -5.55376600 | 3.27179600  | -2.32450400 |
| H | -3.43975400 | 3.55810900  | -1.07355300 |
| C | -2.01229000 | 1.79722600  | 0.26085300  |
| C | -1.94534900 | 1.71650200  | 1.66063300  |
| C | -0.88409300 | 2.26306100  | -0.43764700 |



|    |             |             |             |
|----|-------------|-------------|-------------|
| C  | -0.77812500 | 2.07033900  | 2.34429300  |
| H  | -2.82295900 | 1.41440100  | 2.22406700  |
| C  | 0.27724600  | 2.63170800  | 0.24367900  |
| C  | 0.33790300  | 2.53290300  | 1.64423200  |
| H  | -0.74867500 | 2.00647900  | 3.42900100  |
| C  | -3.79343500 | -2.71882600 | -0.77821700 |
| H  | -4.87695600 | -2.82086500 | -0.67550100 |
| H  | -3.53421300 | -2.61385500 | -1.83429900 |
| H  | -3.32174400 | -3.62648100 | -0.39263400 |
| C  | -3.90943400 | -1.51553200 | 1.84031800  |
| H  | -4.99821300 | -1.44532300 | 1.75850400  |
| H  | -3.63683400 | -2.50024700 | 2.23053900  |
| H  | -3.55089600 | -0.75375500 | 2.53375300  |
| C  | 2.00381400  | -1.30469000 | -0.41603300 |
| C  | 2.34668500  | -0.47752900 | -1.59231200 |
| H  | 1.40220700  | -0.02763300 | -1.93215800 |
| H  | 2.71672200  | -1.12197300 | -2.39712800 |
| O  | 3.32428200  | 0.50217000  | -1.35105000 |
| H  | 3.02278700  | 1.32542400  | -0.74904300 |
| C  | 1.28831900  | -1.87645300 | 0.45308500  |
| H  | 1.51245600  | -2.58938100 | 1.23512700  |
| Au | -0.79472000 | -1.42882600 | 0.26348700  |
| C  | 1.47906100  | 3.22151100  | -0.44864700 |

|   |             |             |             |
|---|-------------|-------------|-------------|
| H | 1.49213100  | 4.30889600  | -0.26426000 |
| H | 1.42031800  | 3.08827600  | -1.53395000 |
| C | 1.64295000  | 2.93774400  | 2.28013000  |
| H | 1.73220700  | 4.03345900  | 2.29236100  |
| H | 1.70098600  | 2.60691300  | 3.32176100  |
| H | -0.92566500 | 2.34675900  | -1.52128200 |
| C | 4.55192400  | -1.40507000 | 0.11862800  |
| H | 4.43132000  | -1.05391400 | 1.14602200  |
| C | 4.40412200  | -2.73416300 | -0.10772200 |
| H | 4.56670100  | -3.10195000 | -1.12207600 |
| B | 5.04251700  | -0.37648100 | -0.97949000 |
| O | 5.35238600  | -0.88745700 | -2.22317600 |
| H | 5.79757200  | -0.25308600 | -2.79799200 |
| C | 4.10171700  | -3.77195800 | 0.92652000  |
| H | 3.93711900  | -3.33453300 | 1.91628700  |
| H | 3.22924500  | -4.37674300 | 0.64469200  |
| H | 4.94054900  | -4.47584900 | 1.00516500  |
| C | 2.81255000  | 2.33015100  | 1.48680700  |
| H | 3.76715200  | 2.68400700  | 1.88437500  |
| H | 2.79298200  | 1.24138300  | 1.61147900  |
| N | 2.76881600  | 2.63289900  | 0.01769900  |
| C | 3.89033800  | 3.50334400  | -0.40250100 |
| H | 4.83661200  | 3.00569700  | -0.18553600 |

|   |            |            |             |
|---|------------|------------|-------------|
| H | 3.83037600 | 3.66871500 | -1.48196900 |
| H | 3.85857300 | 4.47780100 | 0.10504000  |
| F | 5.69531100 | 0.75178600 | -0.54151100 |

**Cartesian coordinates and energies calculated for complex L3-FOH-INT in gas phase.**

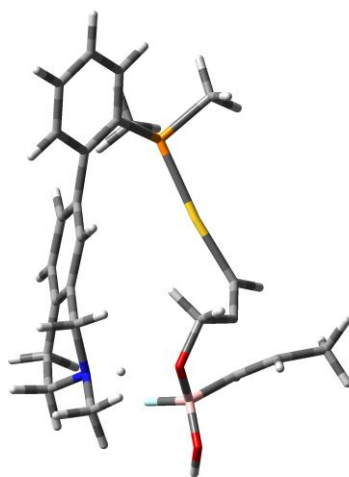

Energy = -1740.540558 (aU); Number of Imaginary Frequencies = 0.

|   |             |             |             |
|---|-------------|-------------|-------------|
| P | -3.14087000 | -0.95126300 | 0.38614900  |
| C | -3.73634600 | 0.65001100  | -0.32321700 |
| C | -5.03177800 | 0.66575700  | -0.87506700 |
| C | -5.56091100 | 1.80459500  | -1.48041600 |
| C | -4.78911200 | 2.96349600  | -1.55356100 |
| C | -3.50801100 | 2.96969800  | -1.00596200 |
| C | -2.95832900 | 1.83598100  | -0.37852300 |
| H | -5.64708700 | -0.22583800 | -0.84653300 |
| H | -6.56461000 | 1.77983000  | -1.89313400 |

|   |             |             |             |
|---|-------------|-------------|-------------|
| H | -5.18280400 | 3.85993200  | -2.02280500 |
| H | -2.91902200 | 3.88144100  | -1.03542500 |
| C | -1.59458000 | 1.99724100  | 0.20789300  |
| C | -1.35195600 | 1.82257400  | 1.58088000  |
| C | -0.53157000 | 2.43569000  | -0.59462000 |
| C | -0.08781100 | 2.05216800  | 2.11654900  |
| H | -2.16631300 | 1.54067000  | 2.23979400  |
| C | 0.73830800  | 2.68182500  | -0.05646500 |
| C | 0.97680300  | 2.47985200  | 1.31122800  |
| H | 0.07797200  | 1.90349300  | 3.18044800  |
| C | -4.13745900 | -2.26131900 | -0.44940000 |
| H | -5.20351900 | -2.18937800 | -0.21939000 |
| H | -3.99225700 | -2.21452500 | -1.53138200 |
| H | -3.77245300 | -3.22891600 | -0.09444700 |
| C | -3.79149600 | -1.02048200 | 2.11357100  |
| H | -4.85828600 | -0.77838200 | 2.12683700  |
| H | -3.64423500 | -2.03193800 | 2.50319300  |
| H | -3.25749800 | -0.32243400 | 2.75998600  |
| C | 2.09909500  | -1.89357600 | -0.62341300 |
| C | 2.09620700  | -0.50901000 | -1.25243400 |
| H | 1.21726800  | 0.03516500  | -0.88776200 |
| H | 2.03227100  | -0.57414100 | -2.34791600 |
| O | 3.29647100  | 0.16821500  | -0.90242700 |

|    |             |             |             |
|----|-------------|-------------|-------------|
| H  | 3.22915500  | 1.69734500  | -0.50777100 |
| C  | 1.01789000  | -2.44213000 | 0.01360900  |
| H  | 1.17816100  | -3.43757900 | 0.43075700  |
| Au | -0.84569900 | -1.62932900 | 0.20059200  |
| C  | 1.84371200  | 3.17568900  | -0.96675600 |
| H  | 1.84127500  | 4.26949100  | -1.05225500 |
| H  | 1.73814000  | 2.76145700  | -1.97298400 |
| C  | 2.35931000  | 2.63975400  | 1.90687500  |
| H  | 2.31507400  | 3.26350800  | 2.80691900  |
| H  | 2.72311100  | 1.65502400  | 2.21610900  |
| C  | 4.29520800  | 3.24375000  | -1.35241000 |
| H  | 5.23423700  | 2.82031300  | -0.99389000 |
| H  | 4.10578200  | 2.88058700  | -2.36326200 |
| H  | 4.33568300  | 4.33532300  | -1.34258000 |
| H  | -0.69760500 | 2.57628900  | -1.66019000 |
| C  | 3.59886800  | -2.09336800 | 0.10992900  |
| H  | 3.54385700  | -2.65016000 | 1.04546000  |
| C  | 3.36258300  | -2.82317900 | -1.09661200 |
| H  | 3.71794800  | -2.34910900 | -2.01340900 |
| B  | 4.16814200  | -0.54099300 | 0.09387100  |
| C  | 3.24950300  | -4.32827700 | -1.17505400 |
| H  | 4.24710600  | -4.73683800 | -1.37263200 |
| H  | 2.89661200  | -4.77003500 | -0.23928700 |

|   |            |             |             |
|---|------------|-------------|-------------|
| H | 2.59111400 | -4.64582500 | -1.98886000 |
| N | 3.19505100 | 2.77310400  | -0.45767600 |
| C | 3.38280600 | 3.25872400  | 0.95419700  |
| H | 3.30150100 | 4.35049200  | 0.91575900  |
| H | 4.39735800 | 2.99305400  | 1.25640800  |
| O | 5.52153200 | -0.37041900 | -0.32632100 |
| H | 6.14662300 | -0.52306500 | 0.39107200  |
| F | 3.95144500 | 0.01541700  | 1.40595600  |

**Cartesian coordinates and energies calculated for TS L3-FOH-TS-II in gas phase.**

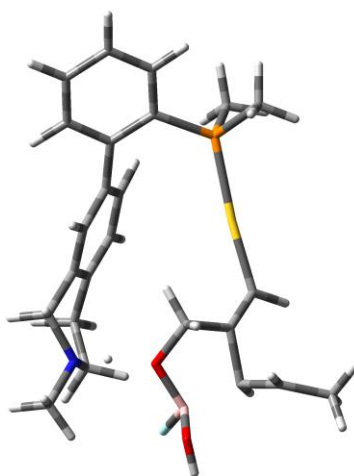

Energy = -1740.531399 (aU); Number of Imaginary Frequencies = 1(-103.69).

|   |             |             |             |
|---|-------------|-------------|-------------|
| P | -3.11798300 | -1.20750200 | 0.24135700  |
| C | -3.79686700 | 0.32242700  | -0.54410900 |
| C | -5.02052300 | 0.21704700  | -1.23202000 |
| C | -5.58391700 | 1.30195200  | -1.90230700 |
| C | -4.91957000 | 2.52806800  | -1.90295000 |
| C | -3.71118200 | 2.65398100  | -1.22052900 |

|   |             |             |             |
|---|-------------|-------------|-------------|
| C | -3.13162100 | 1.57509400  | -0.52719300 |
| H | -5.54889400 | -0.72910900 | -1.26015200 |
| H | -6.52985100 | 1.18434700  | -2.42179900 |
| H | -5.34121200 | 3.38361000  | -2.42168900 |
| H | -3.20777800 | 3.61595400  | -1.19776900 |
| C | -1.85773500 | 1.86291800  | 0.20041800  |
| C | -1.76574000 | 1.76183200  | 1.59757700  |
| C | -0.74629600 | 2.35753700  | -0.50459900 |
| C | -0.60070100 | 2.13126700  | 2.27444100  |
| H | -2.62551600 | 1.42492900  | 2.16728500  |
| C | 0.41181100  | 2.74441700  | 0.17198300  |
| C | 0.49331200  | 2.63446900  | 1.56876900  |
| H | -0.55602500 | 2.04621900  | 3.35688800  |
| C | -3.85133300 | -2.61182300 | -0.70510300 |
| H | -4.93890600 | -2.66412800 | -0.60787200 |
| H | -3.58091100 | -2.53562700 | -1.76109600 |
| H | -3.42326200 | -3.53574900 | -0.30674300 |
| C | -3.97480000 | -1.35317900 | 1.87159900  |
| H | -5.05665500 | -1.24824000 | 1.74706300  |
| H | -3.75273400 | -2.33575200 | 2.29804000  |
| H | -3.61822800 | -0.58939500 | 2.56498200  |
| C | 2.22537500  | -1.45075400 | -0.30025300 |
| C | 2.10831600  | -0.50777400 | -1.47947200 |

|    |             |             |             |
|----|-------------|-------------|-------------|
| H  | 1.14146700  | 0.00368700  | -1.47407400 |
| H  | 2.21186900  | -1.03875100 | -2.43756200 |
| O  | 3.16985400  | 0.43051500  | -1.33423700 |
| H  | 2.97723700  | 1.79070800  | -0.54999500 |
| C  | 1.24600900  | -1.97013000 | 0.46239100  |
| H  | 1.55930100  | -2.66731800 | 1.24169300  |
| Au | -0.75209500 | -1.52683100 | 0.35284500  |
| C  | 1.59414400  | 3.35584000  | -0.53164100 |
| H  | 1.65414400  | 4.43152100  | -0.32647600 |
| H  | 1.54663700  | 3.22042500  | -1.61462600 |
| C  | 1.79047100  | 3.07547800  | 2.19877500  |
| H  | 1.85139500  | 4.17313500  | 2.21569200  |
| H  | 1.86408200  | 2.74596500  | 3.23944800  |
| C  | 4.06331400  | 3.55158200  | -0.57455500 |
| H  | 4.97813600  | 3.00335500  | -0.35079400 |
| H  | 3.96466400  | 3.67203400  | -1.65505400 |
| H  | 4.06730100  | 4.53057700  | -0.08991100 |
| H  | -0.79781900 | 2.44461200  | -1.58710000 |
| C  | 3.76814900  | -1.59834200 | 0.02962200  |
| H  | 3.98896400  | -1.55137700 | 1.09782500  |
| C  | 3.86561400  | -2.88364900 | -0.53286900 |
| H  | 3.69346000  | -2.96523900 | -1.60586000 |
| B  | 4.41230100  | -0.30028100 | -0.88977600 |



|   |            |             |             |
|---|------------|-------------|-------------|
| C | 4.21587100 | -4.13993100 | 0.16450200  |
| H | 5.20284700 | -4.44907800 | -0.21787500 |
| H | 4.28037100 | -4.02806200 | 1.24832500  |
| H | 3.53085200 | -4.95367300 | -0.10006100 |
| N | 2.90439600 | 2.75019700  | -0.07257500 |
| C | 2.98551200 | 2.49830000  | 1.43031800  |
| H | 3.92826900 | 2.91815500  | 1.78326100  |
| H | 3.03402900 | 1.41569100  | 1.55405900  |
| O | 5.19031000 | -0.85329600 | -1.94336100 |
| H | 5.61246800 | -0.18328900 | -2.49362500 |
| F | 5.10625300 | 0.61050400  | -0.04762300 |

**Cartesian coordinates and energies calculated for complex L3-FOH-PROD in gas phase.**

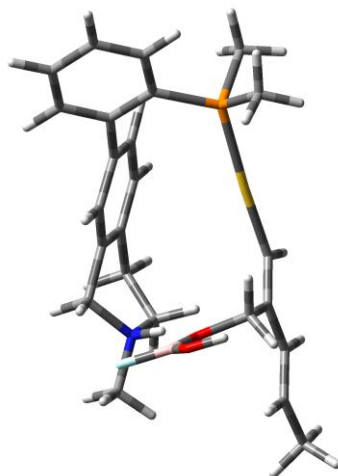

Energy = -1740.593797 (aU); Number of Imaginary Frequencies = 0.

|   |            |             |             |
|---|------------|-------------|-------------|
| P | 2.95542000 | -1.30301800 | -0.00370400 |
| C | 3.69336300 | 0.33818900  | 0.43712400  |

|   |             |             |             |
|---|-------------|-------------|-------------|
| C | 4.91439300  | 0.34326900  | 1.13711800  |
| C | 5.51751600  | 1.52918100  | 1.55382300  |
| C | 4.89748800  | 2.74887000  | 1.28103700  |
| C | 3.69253400  | 2.76517100  | 0.58072400  |
| C | 3.07794800  | 1.57979500  | 0.13913800  |
| H | 5.40804200  | -0.59282200 | 1.37491100  |
| H | 6.46016500  | 1.49640500  | 2.09136500  |
| H | 5.35083600  | 3.68151100  | 1.60267800  |
| H | 3.22002500  | 3.71472500  | 0.34656900  |
| C | 1.80916300  | 1.72376000  | -0.63764800 |
| C | 1.74090200  | 1.38631300  | -1.99849000 |
| C | 0.66633500  | 2.25948400  | -0.02227000 |
| C | 0.55656500  | 1.54206300  | -2.72288700 |
| H | 2.62529800  | 1.00387600  | -2.49886200 |
| C | -0.51349400 | 2.42579500  | -0.74840300 |
| C | -0.58089100 | 2.05742800  | -2.10075100 |
| H | 0.52321700  | 1.25786800  | -3.77110900 |
| C | 3.47830000  | -2.43975200 | 1.35348000  |
| H | 4.56333500  | -2.55620000 | 1.41555000  |
| H | 3.09787600  | -2.07505900 | 2.31092100  |
| H | 3.03389500  | -3.41915500 | 1.15597300  |
| C | 3.96012000  | -1.89566600 | -1.43617000 |
| H | 5.02951700  | -1.84211500 | -1.21146500 |

|    |             |             |             |
|----|-------------|-------------|-------------|
| H  | 3.68681200  | -2.93145700 | -1.65734400 |
| H  | 3.75080300  | -1.28796100 | -2.31935500 |
| C  | -2.48038000 | -1.64343800 | 0.00783900  |
| C  | -2.31306500 | -1.29294800 | 1.46211100  |
| H  | -1.27402000 | -1.45241900 | 1.75973800  |
| H  | -2.98242400 | -1.88859300 | 2.09427600  |
| O  | -2.63474400 | 0.12354700  | 1.68342700  |
| H  | -2.80768700 | 1.24480800  | 0.17293600  |
| C  | -1.39179300 | -1.77656300 | -0.79455500 |
| H  | -1.62400400 | -2.06232000 | -1.82574500 |
| Au | 0.59568300  | -1.50602600 | -0.38516600 |
| C  | -1.76728800 | 2.99390500  | -0.14441400 |
| H  | -2.02345600 | 3.96687800  | -0.57832600 |
| H  | -1.70681900 | 3.10252600  | 0.93933100  |
| C  | -1.92606100 | 2.21174400  | -2.76398800 |
| H  | -2.14258600 | 3.27124700  | -2.96018600 |
| H  | -1.95701800 | 1.70485100  | -3.73294800 |
| C  | -4.23740900 | 2.70573600  | 0.03127200  |
| H  | -5.04188100 | 1.98020100  | -0.09466100 |
| H  | -4.14157800 | 2.97345300  | 1.08359800  |
| H  | -4.43437600 | 3.59397500  | -0.57162800 |
| H  | 0.70265800  | 2.52908600  | 1.03018400  |
| C  | -3.84464200 | -1.86576600 | -0.50075700 |

|   |             |             |             |
|---|-------------|-------------|-------------|
| H | -3.89288800 | -2.20040900 | -1.53850800 |
| C | -5.00702200 | -1.72313700 | 0.16694400  |
| H | -4.99572000 | -1.39398100 | 1.20654600  |
| B | -2.55853300 | 0.69537700  | 2.92237900  |
| C | -6.36264000 | -2.02183300 | -0.40679300 |
| H | -7.03021200 | -1.15252300 | -0.34293700 |
| H | -6.29901600 | -2.32883500 | -1.45534200 |
| H | -6.85463200 | -2.82856300 | 0.15156700  |
| N | -2.95431000 | 2.08041000  | -0.42678300 |
| C | -3.03101200 | 1.60792000  | -1.88434900 |
| H | -4.02174300 | 1.87320400  | -2.25653100 |
| H | -2.94468800 | 0.52127900  | -1.85082700 |
| O | -2.28211900 | 0.10190200  | 4.10367500  |
| H | -2.13334700 | -0.85024400 | 4.09790100  |
| F | -2.78005200 | 2.02973800  | 2.93993000  |

**Energies for these structures computed as a single point in DCM using differentiated basis set (6-31+G(d,p) for C, H, O, N, F, P and B; def2-TZVP<sup>[26]</sup> for Au) were reported below.**

| Compound Name | Energy (aU)  | $\Delta G$ and $\Delta G^\ddagger$ (for TSs)         |
|---------------|--------------|------------------------------------------------------|
| L3-CPX        | -1740.899756 |                                                      |
| L3-TS-I       | -1740.872056 | $\Delta G^\ddagger = 17.4$ kcal/mol                  |
| L3-INTERM     | -1740.922382 | $\Delta G^{\text{CPX-INTERM}} = 14.2$ kcal/mol       |
| L3-TS-II      | -1740.912621 | $\Delta G^\ddagger = 6.1$ kcal/mol                   |
| L3-FINAL-PROD | -1740.975827 | $\Delta G^{\text{INTERM-PROD-REAL}} = 33.5$ kcal/mol |

**Pathway for B-F-OH moiety and L4 in gas phase and in DCM as a solvent.**

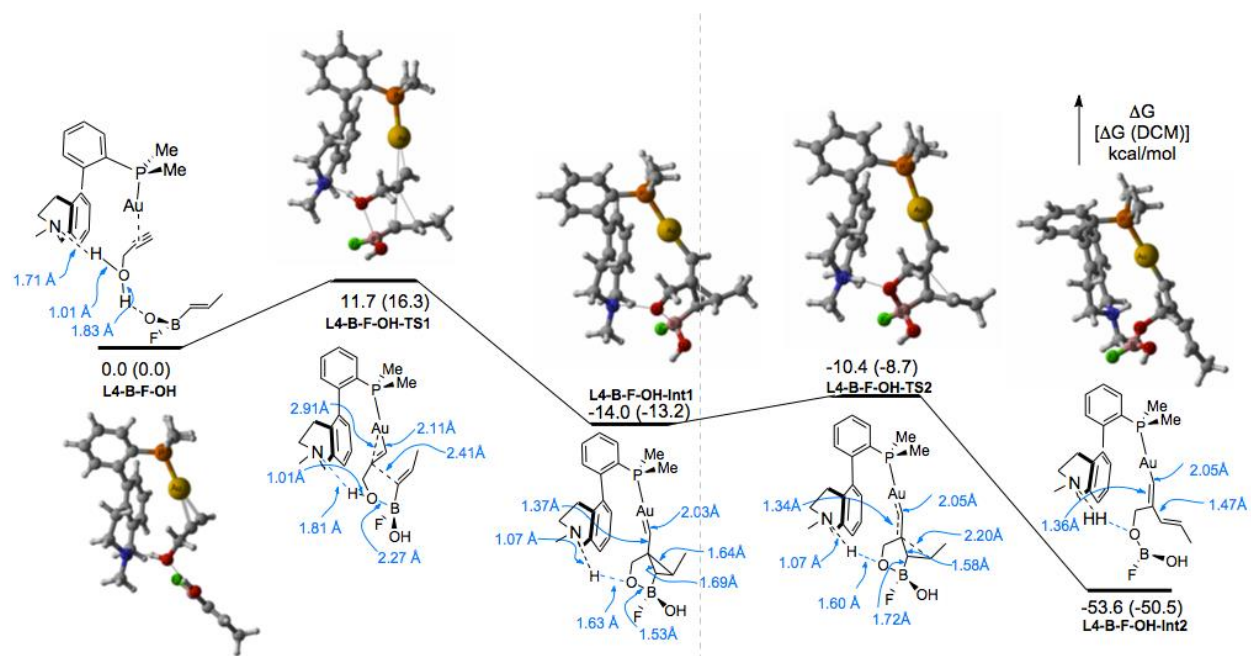

**Figure 1.** Reaction pathway modeled.

**Cartesian coordinates and energies calculated for complex L4-B-F-OH in gas phase.**

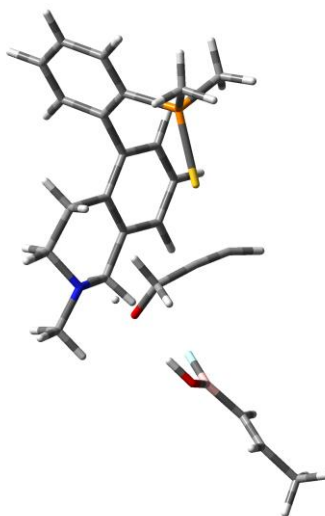

Energy = -1740.513948 (aU); Number of Imaginary Frequencies = 0

|   |             |             |             |
|---|-------------|-------------|-------------|
| P | -3.12208000 | -1.51075900 | 0.04688000  |
| C | -3.90932200 | 0.14191100  | -0.06458100 |
| C | -5.19113800 | 0.21806100  | -0.64462200 |

|   |             |             |             |
|---|-------------|-------------|-------------|
| C | -5.87273000 | 1.43021800  | -0.73144800 |
| C | -5.27887400 | 2.59041900  | -0.23189300 |
| C | -4.01033200 | 2.52582900  | 0.34258200  |
| C | -3.29903500 | 1.31693700  | 0.43707200  |
| H | -5.67333200 | -0.67075800 | -1.03569800 |
| H | -6.85970900 | 1.46354700  | -1.18181500 |
| H | -5.80186300 | 3.54047100  | -0.28371300 |
| H | -3.55447200 | 3.42660200  | 0.74339300  |
| C | -1.95803000 | 1.35246200  | 1.10905300  |
| C | -1.86223800 | 0.93356400  | 2.44376700  |
| C | -0.82248000 | 1.89811100  | 0.46041300  |
| C | -0.65208600 | 1.02478600  | 3.13572700  |
| H | -2.75069600 | 0.57088200  | 2.95301500  |
| C | 0.38757400  | 2.00020200  | 1.16940500  |
| C | 0.46557800  | 1.55410400  | 2.49655500  |
| H | -0.58966400 | 0.70250800  | 4.17072000  |
| H | 1.40798000  | 1.63820600  | 3.03194700  |
| N | 1.57215400  | 2.74034200  | -0.91052300 |
| C | 2.69004400  | 3.57336400  | -1.39554500 |
| H | 2.69896600  | 3.57339000  | -2.48851400 |
| H | 2.60615700  | 4.61132900  | -1.03903200 |
| H | 3.63625100  | 3.15836400  | -1.03944500 |
| C | 0.27821000  | 3.28950500  | -1.35350800 |
| H | 0.31507600  | 3.43264900  | -2.43782700 |
| H | 0.11560600  | 4.28210300  | -0.89812100 |
| C | -3.88819300 | -2.56875400 | -1.24698500 |
| H | -4.95673200 | -2.71427800 | -1.06765700 |
| H | -3.74028900 | -2.12736800 | -2.23534700 |
| H | -3.39608100 | -3.54442200 | -1.22212900 |
| C | -3.67269100 | -2.27797000 | 1.62571200  |

|    |             |             |             |
|----|-------------|-------------|-------------|
| H  | -4.76332900 | -2.22818800 | 1.69789600  |
| H  | -3.35320100 | -3.32364700 | 1.64964400  |
| H  | -3.22983600 | -1.75276000 | 2.47323800  |
| C  | 1.61131100  | 2.65793200  | 0.56225300  |
| H  | 2.51375600  | 2.11085900  | 0.85016300  |
| H  | 1.70343800  | 3.67508500  | 0.98605700  |
| C  | -0.87183000 | 2.35145200  | -0.98816500 |
| H  | -1.81857400 | 2.85336100  | -1.20727000 |
| H  | -0.84407200 | 1.47024200  | -1.64641100 |
| C  | 1.47592200  | -1.41804200 | -1.00748800 |
| C  | 1.73174400  | -0.63394200 | -2.24449000 |
| H  | 0.77571700  | -0.36688100 | -2.71462700 |
| H  | 2.25810200  | -1.29778000 | -2.94149000 |
| O  | 2.54480900  | 0.48236900  | -2.00723700 |
| H  | 2.04232900  | 1.25884200  | -1.57991800 |
| C  | 1.41849100  | -2.06001500 | 0.04124700  |
| H  | 1.67471700  | -2.65001400 | 0.89950200  |
| Au | -0.79662400 | -1.58348500 | -0.14233700 |
| C  | 6.71705100  | -0.31351500 | 0.88599000  |
| H  | 6.86571600  | -0.04986900 | 1.93442900  |
| C  | 7.70723800  | -0.96649300 | 0.24603100  |
| H  | 7.56041100  | -1.22439000 | -0.80427400 |
| B  | 5.39687000  | 0.08752700  | 0.19389900  |
| O  | 5.10486900  | -0.20454600 | -1.09395800 |
| H  | 4.23659800  | 0.11922600  | -1.40925200 |
| C  | 9.01934600  | -1.37634500 | 0.84134200  |
| H  | 9.09892500  | -1.08963000 | 1.89402400  |
| H  | 9.15924400  | -2.46236400 | 0.76285600  |
| H  | 9.85233200  | -0.91922500 | 0.29155300  |
| F  | 4.45633300  | 0.77614200  | 0.92429600  |

**Cartesian coordinates and energies calculated for TS L4 L4-B-F-OH-TS-I in gas phase.**

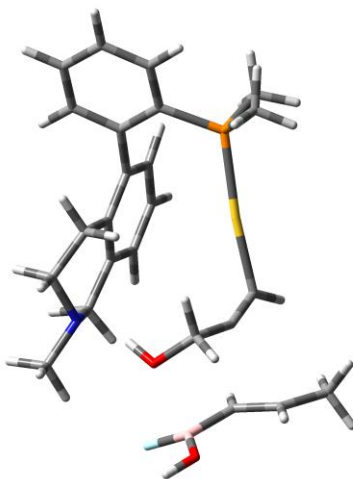

Energy = -1740.495316 (aU); Number of Imaginary Frequencies = 1(-188.43).

|   |             |             |             |
|---|-------------|-------------|-------------|
| P | -2.82099000 | -1.50973200 | -0.24008000 |
| C | -3.62367600 | 0.11551500  | -0.55324700 |
| C | -4.75718500 | 0.14651900  | -1.38852000 |
| C | -5.44115800 | 1.33484800  | -1.63858300 |
| C | -4.99953700 | 2.51972100  | -1.04792100 |
| C | -3.87734800 | 2.50186500  | -0.22114300 |
| C | -3.16675000 | 1.31706800  | 0.03997600  |
| H | -5.12017400 | -0.76240900 | -1.85487500 |
| H | -6.31264000 | 1.33062200  | -2.28575300 |
| H | -5.52750200 | 3.45188500  | -1.22471300 |
| H | -3.54087500 | 3.42125500  | 0.24952000  |
| C | -1.99512400 | 1.41145500  | 0.97362700  |
| C | -2.16602100 | 1.02905500  | 2.31126300  |
| C | -0.76729400 | 1.98403100  | 0.55953200  |
| C | -1.13284300 | 1.18670300  | 3.23779300  |
| H | -3.12766100 | 0.64126300  | 2.63499100  |
| C | 0.26143000  | 2.15528200  | 1.50186900  |



|   |             |             |             |
|---|-------------|-------------|-------------|
| C | 0.07378000  | 1.74811700  | 2.83005800  |
| H | -1.27794400 | 0.89150700  | 4.27253600  |
| H | 0.87488700  | 1.89096200  | 3.55153800  |
| N | 1.82242900  | 2.95259900  | -0.30112900 |
| C | 2.94755800  | 3.87699500  | -0.54330800 |
| H | 3.17033900  | 3.90541200  | -1.61311900 |
| H | 2.71284500  | 4.89728300  | -0.20216100 |
| H | 3.83512400  | 3.52094300  | -0.01538400 |
| C | 0.61436700  | 3.40853600  | -1.01339800 |
| H | 0.87080800  | 3.54815600  | -2.06807000 |
| H | 0.29378700  | 4.39028000  | -0.62206900 |
| C | -3.29372100 | -2.60848100 | -1.63981600 |
| H | -4.37161600 | -2.78649500 | -1.67493600 |
| H | -2.96293500 | -2.17746900 | -2.58780900 |
| H | -2.78851300 | -3.56761800 | -1.49926800 |
| C | -3.70094900 | -2.25098800 | 1.19882300  |
| H | -4.78190800 | -2.22946200 | 1.03116300  |
| H | -3.37198200 | -3.28638000 | 1.32529600  |
| H | -3.46525200 | -1.69499500 | 2.10780400  |
| C | 1.55698900  | 2.86096100  | 1.14624200  |
| H | 2.40487000  | 2.35115900  | 1.61712500  |
| H | 1.52326600  | 3.87771900  | 1.57978600  |
| C | -0.52224400 | 2.39704900  | -0.87979100 |
| H | -1.42672600 | 2.82293800  | -1.32312700 |
| H | -0.28737700 | 1.50458100  | -1.47831000 |
| C | 2.36586900  | -1.18572600 | -0.41091600 |
| C | 2.58195000  | -0.37689700 | -1.63707600 |
| H | 1.59068800  | -0.27452100 | -2.10350800 |
| H | 3.22020100  | -0.91832400 | -2.34187700 |
| O | 3.18203900  | 0.86750200  | -1.39058900 |

|    |             |             |             |
|----|-------------|-------------|-------------|
| H  | 2.55684000  | 1.52816200  | -0.93954300 |
| C  | 1.58461100  | -1.75580800 | 0.42360100  |
| H  | 1.84243800  | -2.34051800 | 1.29775000  |
| Au | -0.48848200 | -1.54210500 | 0.06305800  |
| C  | 4.57043700  | -0.90016000 | 0.42212700  |
| H  | 4.27433000  | -0.68710600 | 1.44979600  |
| C  | 4.66643200  | -2.20950700 | 0.04921600  |
| H  | 5.01094600  | -2.42623400 | -0.96301300 |
| B  | 5.15809100  | 0.28124800  | -0.44537900 |
| O  | 5.78956200  | -0.02285400 | -1.61281200 |
| H  | 6.18036600  | 0.73707600  | -2.06265300 |
| C  | 4.43678400  | -3.39411800 | 0.92858500  |
| H  | 4.04827100  | -3.11654100 | 1.91255100  |
| H  | 3.76829300  | -4.12368400 | 0.45701900  |
| H  | 5.39371300  | -3.91133900 | 1.08211600  |
| F  | 5.34195200  | 1.48447900  | 0.15320900  |

**Cartesian coordinates and energies calculated for complex L4-B-F-OH-Int1 in gas phase.**

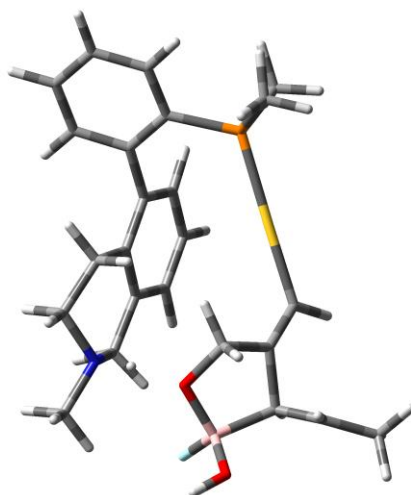

Energy = -1740.536293 (aU); Number of Imaginary Frequencies = 0

|   |             |             |             |
|---|-------------|-------------|-------------|
| P | -2.75346100 | -1.47781900 | -0.08197600 |
|---|-------------|-------------|-------------|

|   |             |             |             |
|---|-------------|-------------|-------------|
| C | -3.52634800 | 0.13250500  | -0.53627300 |
| C | -4.64671000 | 0.12180200  | -1.38748100 |
| C | -5.29587400 | 1.29938200  | -1.75262400 |
| C | -4.83411300 | 2.51929500  | -1.26191700 |
| C | -3.72580100 | 2.54587600  | -0.41793600 |
| C | -3.04958100 | 1.37198200  | -0.04456100 |
| H | -5.02642300 | -0.81594700 | -1.77743400 |
| H | -6.15809100 | 1.25871400  | -2.41129600 |
| H | -5.33588700 | 3.44507800  | -1.52746300 |
| H | -3.37556200 | 3.49487000  | -0.02078200 |
| C | -1.89051300 | 1.52926200  | 0.89642000  |
| C | -2.07525200 | 1.25035800  | 2.25645000  |
| C | -0.66015100 | 2.07937300  | 0.46313700  |
| C | -1.05849900 | 1.48351700  | 3.18383700  |
| H | -3.03922000 | 0.88157900  | 2.59474900  |
| C | 0.34662000  | 2.33728300  | 1.40644400  |
| C | 0.14803400  | 2.02766500  | 2.75808400  |
| H | -1.21654600 | 1.26087200  | 4.23466500  |
| H | 0.93702600  | 2.23053500  | 3.47820300  |
| N | 1.93723000  | 3.03831300  | -0.43220000 |
| C | 3.06958400  | 3.96491000  | -0.74795100 |
| H | 3.31325100  | 3.86097600  | -1.80672800 |
| H | 2.76463000  | 4.99115900  | -0.53002800 |
| H | 3.92807100  | 3.67583900  | -0.14253300 |
| C | 0.71160900  | 3.37962800  | -1.22730700 |
| H | 1.00633400  | 3.42338500  | -2.27870400 |
| H | 0.39715100  | 4.38072900  | -0.91315000 |
| C | -3.31060400 | -2.68970600 | -1.35661200 |

|    |             |             |             |
|----|-------------|-------------|-------------|
| H  | -4.39516800 | -2.83440600 | -1.34815200 |
| H  | -2.99129500 | -2.37057500 | -2.35278300 |
| H  | -2.83279400 | -3.64870400 | -1.13447000 |
| C  | -3.64230300 | -2.05346300 | 1.43117500  |
| H  | -4.72595200 | -2.00296400 | 1.28275100  |
| H  | -3.35333900 | -3.08899700 | 1.63856700  |
| H  | -3.36624700 | -1.43870100 | 2.29059400  |
| C  | 1.64421500  | 3.03132200  | 1.04035600  |
| H  | 2.50381800  | 2.55569000  | 1.51745800  |
| H  | 1.61300900  | 4.08100200  | 1.35849600  |
| C  | -0.39128600 | 2.35176000  | -1.00496200 |
| H  | -1.29162400 | 2.71175700  | -1.51072700 |
| H  | -0.12121200 | 1.41256500  | -1.50822400 |
| C  | 2.64789900  | -1.52568300 | -0.46262800 |
| C  | 2.50223300  | -0.52067500 | -1.60245500 |
| H  | 1.44288700  | -0.37647300 | -1.83873900 |
| H  | 3.01377700  | -0.87126100 | -2.50957700 |
| O  | 3.07184600  | 0.70672800  | -1.16819900 |
| H  | 2.27445400  | 2.06181600  | -0.70631900 |
| C  | 1.62289300  | -1.97187100 | 0.32358500  |
| H  | 1.92605200  | -2.61354300 | 1.15271500  |
| Au | -0.37446300 | -1.63439900 | 0.13228900  |
| C  | 4.03824100  | -1.02586400 | 0.37520400  |
| H  | 3.93017000  | -1.10145100 | 1.45715800  |
| C  | 4.12689700  | -2.24431700 | -0.36280200 |
| H  | 4.54672300  | -2.15377100 | -1.36506000 |
| B  | 4.32969800  | 0.43001300  | -0.34896300 |
| O  | 5.51296900  | 0.29301100  | -1.13049900 |

|   |            |             |             |
|---|------------|-------------|-------------|
| H | 5.84876300 | 1.13494000  | -1.46896300 |
| C | 4.28951600 | -3.61050800 | 0.26249800  |
| H | 3.88326000 | -3.66144400 | 1.27704300  |
| H | 3.82889500 | -4.39483500 | -0.34622800 |
| H | 5.36260000 | -3.82564500 | 0.33012900  |
| F | 4.38456500 | 1.50031600  | 0.60370400  |

**Cartesian coordinates and energies calculated for TS L4-B-F-OH-TS-II in gas phase.**

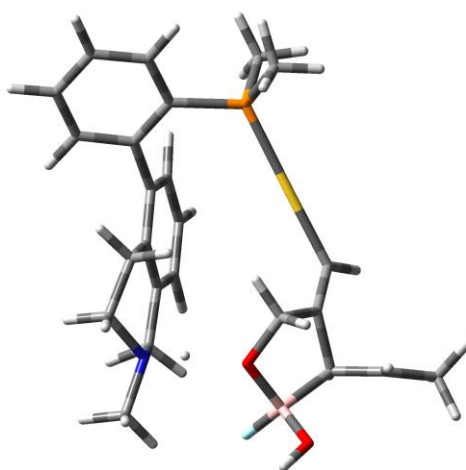

Energy = -1740.530522 (aU); Number of Imaginary Frequencies = 1(-105.25).

|   |             |             |             |
|---|-------------|-------------|-------------|
| P | -2.85253900 | -1.45602800 | -0.22276000 |
| C | -3.55594100 | 0.23060300  | -0.50847800 |
| C | -4.71501700 | 0.33765000  | -1.30138000 |
| C | -5.33088500 | 1.56495200  | -1.54024200 |
| C | -4.79521800 | 2.72313200  | -0.97608400 |
| C | -3.64822200 | 2.63509700  | -0.18952900 |
| C | -3.00411300 | 1.40778000  | 0.05496500  |
| H | -5.15381000 | -0.54879900 | -1.74527400 |
| H | -6.22394100 | 1.61122900  | -2.15573300 |
| H | -5.26978700 | 3.68613600  | -1.13858700 |

|   |             |             |             |
|---|-------------|-------------|-------------|
| H | -3.24310200 | 3.53302600  | 0.26923400  |
| C | -1.80508100 | 1.45310100  | 0.95914700  |
| C | -1.94352500 | 1.03283400  | 2.28818200  |
| C | -0.58186700 | 2.03236700  | 0.53991700  |
| C | -0.89164800 | 1.15814500  | 3.19767200  |
| H | -2.89670000 | 0.63260400  | 2.61996300  |
| C | 0.46294000  | 2.17694500  | 1.46727000  |
| C | 0.30732800  | 1.73124000  | 2.78653600  |
| H | -1.01434000 | 0.82455200  | 4.22327800  |
| H | 1.12493900  | 1.84446000  | 3.49412100  |
| N | 2.01055800  | 3.03698200  | -0.34385600 |
| C | 3.14240800  | 3.98302400  | -0.60026800 |
| H | 3.34042300  | 4.00121100  | -1.67304000 |
| H | 2.86354100  | 4.98066400  | -0.25381600 |
| H | 4.02302500  | 3.61724500  | -0.07353600 |
| C | 0.76617300  | 3.46772000  | -1.06269700 |
| H | 1.02728100  | 3.60341200  | -2.11490900 |
| H | 0.48073700  | 4.44120500  | -0.64952300 |
| C | -3.40200100 | -2.47438800 | -1.65899200 |
| H | -4.48925900 | -2.57407200 | -1.71458000 |
| H | -3.02613900 | -2.04545800 | -2.59126500 |
| H | -2.96819500 | -3.47108000 | -1.54097200 |
| C | -3.84535800 | -2.15152300 | 1.16964500  |
| H | -4.91628900 | -2.05384900 | 0.96835100  |
| H | -3.59282300 | -3.20912000 | 1.28926300  |
| H | -3.60447800 | -1.63241100 | 2.09942200  |
| C | 1.75952800  | 2.88864200  | 1.12820000  |
| H | 2.62445000  | 2.35928300  | 1.53490700  |

|    |             |             |             |
|----|-------------|-------------|-------------|
| H  | 1.75200700  | 3.90065200  | 1.55123700  |
| C  | -0.35517500 | 2.44786600  | -0.90170600 |
| H  | -1.26078700 | 2.87951900  | -1.33551200 |
| H  | -0.13160200 | 1.55893600  | -1.50658000 |
| C  | 2.46999200  | -1.25579300 | -0.29165600 |
| C  | 2.33863800  | -0.41720200 | -1.54209900 |
| H  | 1.29001200  | -0.18686700 | -1.75072000 |
| H  | 2.75588400  | -0.92666100 | -2.42358800 |
| O  | 3.07561200  | 0.77379400  | -1.28111100 |
| H  | 2.33979800  | 2.08400600  | -0.71772300 |
| C  | 1.51325500  | -1.89507600 | 0.40096800  |
| H  | 1.83843900  | -2.47635000 | 1.26547800  |
| Au | -0.50205700 | -1.67723500 | 0.09437400  |
| C  | 3.94043000  | -1.03457100 | 0.25895500  |
| H  | 3.98015100  | -0.92806700 | 1.34452400  |
| C  | 4.43414600  | -2.25638700 | -0.22668800 |
| H  | 4.43708000  | -2.39342900 | -1.30800400 |
| B  | 4.36560200  | 0.39311500  | -0.59411000 |
| O  | 5.43647600  | 0.07440500  | -1.47219300 |
| H  | 5.75441000  | 0.83286200  | -1.97569200 |
| C  | 4.97624500  | -3.37932900 | 0.56838500  |
| H  | 4.88110000  | -3.22948400 | 1.64530400  |
| H  | 4.52593300  | -4.33423900 | 0.27185100  |
| H  | 6.04521100  | -3.46721200 | 0.31420900  |
| F  | 4.63739600  | 1.44189900  | 0.32751000  |

**Cartesian coordinates and energies calculated for complex L4-FOH-PROD in gas phase.**

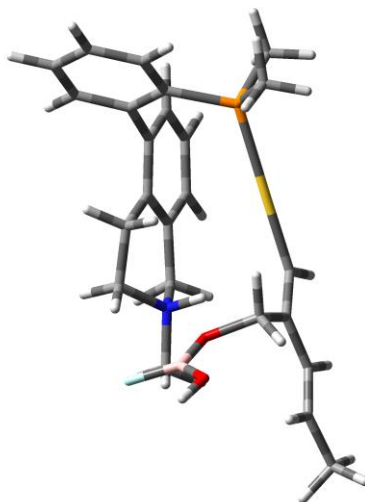

Energy = -1740.599330 (aU); Number of Imaginary Frequencies = 0.

|   |            |             |             |
|---|------------|-------------|-------------|
| P | 2.45695400 | -1.62293700 | -0.40655900 |
| C | 3.28555700 | -0.60507100 | 0.90180300  |
| C | 3.97962300 | -1.25073200 | 1.94073100  |
| C | 4.63429600 | -0.52929000 | 2.94084700  |
| C | 4.61237200 | 0.86437200  | 2.91539800  |
| C | 3.92528500 | 1.52170300  | 1.89361600  |
| C | 3.25164100 | 0.81291500  | 0.88672500  |
| H | 4.01995900 | -2.33291800 | 1.98095200  |
| H | 5.16182100 | -1.05836400 | 3.72854800  |
| H | 5.12631500 | 1.43807200  | 3.68062500  |
| H | 3.91119900 | 2.60794800  | 1.86550300  |
| C | 2.54132900 | 1.60685100  | -0.17069200 |
| C | 3.23075700 | 1.98460400  | -1.32904700 |
| C | 1.20031500 | 2.01833500  | 0.00760800  |
| C | 2.59735100 | 2.71655600  | -2.33655300 |
| H | 4.27439600 | 1.70416500  | -1.43787700 |
| C | 0.55943800 | 2.71265400  | -1.03011900 |
| C | 1.25606000 | 3.05765700  | -2.19568000 |
| H | 3.14310000 | 3.00250400  | -3.23013800 |



|   |             |             |             |
|---|-------------|-------------|-------------|
| H | 0.74650300  | 3.59388000  | -2.99248600 |
| N | -1.64168100 | 2.31293500  | 0.10189200  |
| C | -3.05884200 | 2.77817300  | 0.24314800  |
| H | -3.56773000 | 2.10587900  | 0.93111900  |
| H | -3.05566100 | 3.80031200  | 0.62583100  |
| H | -3.54112600 | 2.73944000  | -0.73406200 |
| C | -0.89515000 | 2.37068000  | 1.41211000  |
| H | -1.52179800 | 1.89055200  | 2.16380900  |
| H | -0.79343800 | 3.43300600  | 1.65514900  |
| C | 2.58822400  | -3.37007000 | 0.16380700  |
| H | 3.62662500  | -3.68996700 | 0.28807300  |
| H | 2.04290000  | -3.51404500 | 1.09970300  |
| H | 2.11978700  | -3.99625200 | -0.60055700 |
| C | 3.60833200  | -1.59828300 | -1.84949000 |
| H | 4.62314100  | -1.86393400 | -1.53878500 |
| H | 3.25347400  | -2.32289600 | -2.58829100 |
| H | 3.61426400  | -0.60988100 | -2.31107800 |
| C | -0.90003100 | 3.10344400  | -0.93907700 |
| H | -1.40547000 | 2.93199900  | -1.89322100 |
| H | -1.02838900 | 4.15931200  | -0.67408400 |
| C | 0.45681900  | 1.67673700  | 1.28542100  |
| H | 1.05638100  | 1.95414000  | 2.15873600  |
| H | 0.31329100  | 0.59112100  | 1.34977400  |
| C | -2.90185800 | -0.81203300 | -0.77502900 |
| C | -2.86326800 | -1.35654100 | 0.63565400  |
| H | -1.90606000 | -1.84871300 | 0.81903600  |
| H | -3.66971900 | -2.06869800 | 0.82655200  |
| O | -2.97194200 | -0.24988600 | 1.58139900  |
| H | -1.67561300 | 1.31907400  | -0.21109800 |
| C | -1.75050800 | -0.63781100 | -1.48172800 |

|    |             |             |             |
|----|-------------|-------------|-------------|
| H  | -1.89425600 | -0.25526700 | -2.49799700 |
| Au | 0.18693000  | -1.08370400 | -0.96338000 |
| C  | -4.21303700 | -0.49505800 | -1.36545500 |
| H  | -4.17644300 | -0.13881500 | -2.39645900 |
| C  | -5.42315200 | -0.62453100 | -0.78777300 |
| H  | -5.49685800 | -0.98837300 | 0.23687000  |
| B  | -3.52951000 | -0.40115400 | 2.80776400  |
| O  | -4.07882000 | -1.56591400 | 3.23431100  |
| H  | -4.45307400 | -1.53742400 | 4.12353200  |
| C  | -6.72795700 | -0.32483100 | -1.46555600 |
| H  | -6.58128800 | 0.03651800  | -2.48804000 |
| H  | -7.35972000 | -1.22119100 | -1.50927000 |
| H  | -7.30138500 | 0.42984200  | -0.91168300 |
| F  | -3.51589800 | 0.69829600  | 3.60055700  |

**Energies for these structures computed as a single point in DCM using differentiated basis set (6-31+G(d,p) for C, H, O, N, F, P and B; def2-TZVP<sup>[26]</sup> for Au) were reported below.**

| Compound Name | Energy (aU)  | $\Delta G$ and $\Delta G^\ddagger$ (for TSs)         |
|---------------|--------------|------------------------------------------------------|
| L4-CPX        | -1740.898343 |                                                      |
| L4-TS-I       | -1740.872386 | $\Delta G^\ddagger = 16.3$ kcal/mol                  |
| L4-INTERM     | -1740.919389 | $\Delta G^{\text{CPX-INTERM}} = 13.2$ kcal/mol       |
| L4-TS-II      | -1740.912245 | $\Delta G^\ddagger = 4.5$ kcal/mol                   |
| L4-FINAL-PROD | -1740.978763 | $\Delta G^{\text{INTERM-PROD-REAL}} = 37.3$ kcal/mol |

## 8. References:

- [1] A. J. J. Lennox, G. C. Lloyd-Jones, *Angew Chem Int Edit* **2012**, *51*, 9385-9388.
- [2] E. Najahi, A. Valentin, P. L. Fabre, K. Reybier, F. Nepveu, *Eur J Med Chem* **2014**, *78*, 269-274.
- [3] S. R. Dubbaka, M. Salla, R. Bolisetti, S. Nizalapur, *Rsc Adv* **2014**, *4*, 6496-6499.
- [4] H. Ueda, M. Yamaguchi, H. Kameya, K. Sugimoto, H. Tokuyama, **2014**, *16*, 4948-4951.
- [5] A. T. Parsons, T. D. Senecal, S. L. Buchwald, *Angew Chem Int Edit* **2012**, *51*, 2947-2950.
- [6] K. Brak, J. A. Ellman, *J Am Chem Soc* **2009**, *131*, 3850-+.
- [7] Y. S. Feng, C. Q. Xie, W. L. Qiao, H. J. Xu, *Org Lett* **2013**, *15*, 936-939.
- [8] C. X. Xu, W. Y. Du, Y. Zeng, B. Dai, H. Guo, *Org Lett* **2014**, *16*, 948-951.
- [9] Y. Yasu, T. Koike, M. Akita, *Chem Commun* **2013**, *49*, 2037-2039.
- [10] Z. P. Chen, W. Zhang, C. A. Palma, A. L. Rizzini, B. L. Liu, A. Abbas, N. Richter, L. Martini, X. Y. Wang, N. Cavani, H. Lu, N. Mishra, C. Coletti, R. Berger, F. Klappenberger, M. Klaui, A. Candini, M. Affronte, C. W. Zhou, V. De Renzi, U. del Pennino, J. V. Barth, H. J. Rader, A. Narita, X. L. Feng, K. Mullen, *J Am Chem Soc* **2016**, *138*, 15488-15496.
- [11] A. Cannillo, S. Norsikian, P. Retailleau, M. E. T. H. Dau, B. I. Iorga, J. M. Beau, *Chem-Eur J* **2013**, *19*, 9127-9131.
- [12] J. Takagi, K. Takahashi, T. Ishiyama, N. Miyaura, *J Am Chem Soc* **2002**, *124*, 8001-8006.
- [13] B. Gopula, C. W. Chiang, W. Z. Lee, T. S. Kuo, P. Y. Wu, J. P. Henschke, H. L. Wu, *Org Lett* **2014**, *16*, 632-635.
- [14] V. Bagutski, A. Ros, V. K. Aggarwal, *Tetrahedron* **2009**, *65*, 9956-9960.
- [15] L. J. Cheng, C. J. Cordier, *Angew Chem Int Edit* **2015**, *54*, 13734-13738.
- [16] L. W. Ye, W. M. He, L. M. Zhang, *J Am Chem Soc* **2010**, *132*, 8550-+.
- [17] N. Maulucci, I. Izzo, G. Bifulco, A. Aliberti, C. De Cola, D. Comegna, C. Gaeta, A. Napolitano, C. Pizza, C. Tedesco, D. Flot, F. De Riccardis, *Chem Commun* **2008**, 3927-3929.
- [18] J. M. Aurrecoechea, E. Perez, M. Solay, *J Org Chem* **2001**, *66*, 564-569.
- [19] K. Asano, S. Matsubara, *J Am Chem Soc* **2011**, *133*, 16711-16713.
- [20] M. Spallarossa, Q. Wang, R. Riva, J. P. Zhu, *Org Lett* **2016**, *18*, 1622-1625.
- [21] (a) A. D. Becke, *J. Chem. Phys.* **1993**, *98*, 5648-5652; (b) C. Lee, W. Yang, R. G. Parr, *Phys. Rev. B* **1988**, *37*, 785-789.
- [22] J. Tomasi, B. Mennucci, R. Cammi, *Chem. Rev.* **2005**, *105*, 2999-3094.
- [23] P. J. Hay, W. R. Wadt, *J. Chem. Phys.* **1985**, *82*, 270-283.
- [24] W. R. Wadt, P. J. Hay, *J. Chem. Phys.* **1985**, *82*, 284-298.
- [25] M. J. T. Frisch, G. W.; Schlegel, H. B.; Scuseria, G. E.; Robb, M. A.; Cheeseman, J. R.; Scalmani, G.; Barone, V.; Mennucci, B.; Petersson, G. A.; Nakatsuji, H.; Caricato, M.; Li, X.; Hratchian, H. P.; Izmaylov, A. F.; Bloino, J.; Zheng, G.; Sonnenberg, J. L.; Hada, M.; Ehara, M.; Toyota, K.; Fukuda, R.; Hasegawa, J.; Ishida, M.; Nakajima, T.; Honda, Y.; Kitao, O.; Nakai, H.; Vreven, T.; Montgomery, A. Jr.; Peralta, J. E.; Ogliaro, F.; Bearpark, M.; Heyd, J. J.; Brothers, E.; Kudin, K. N.; Staroverov, V. N.; Kobayashi, R.; Normand, J.; Raghavachari, K.; Rendell, A.; Burant, J. C.; Iyengar, S. S.; Tomasi, J.; Cossi, M.; Rega, N.; Millam, J. M.; Klene, M.; Knox, J. E.; Cross, J. B.; Bakken, V.; Adamo, C.; Jaramillo, J.; Gomperts, R.; Stratmann, R. E.; Yazyev, O.; Austin, A. J.; Cammi, R.; Pomelli, C.; Ochterski, J. W.; Martin, R. L.; Morokuma, K.; Zakrzewski, V. G.; Voth, G. A.; Salvador, P.; Dannenberg, J. J.; Dapprich, S.; Daniels, A. D.; Farkas, O.; Foresman, J. B.; Ortiz, J. V.; Cioslowski J.; Fox, D. J., Gaussian, Inc., Wallingford, CT, **2009**.
- [26] a) F. Weigend and R. Ahlrichs, "Balanced basis sets of split valence, triple zeta valence and quadruple zeta valence quality for H to Rn: Design and assessment of accuracy," *Phys. Chem. Chem. Phys.*, **7**, **2005**, 3297-3305. (b) F. Weigend, "Accurate Coulomb-fitting basis sets for H to Rn," *Phys. Chem. Chem. Phys.*, **8**, **2006**, 1057-1065

## 10. Chiral HPLC analysis.

### <Chromatogram>

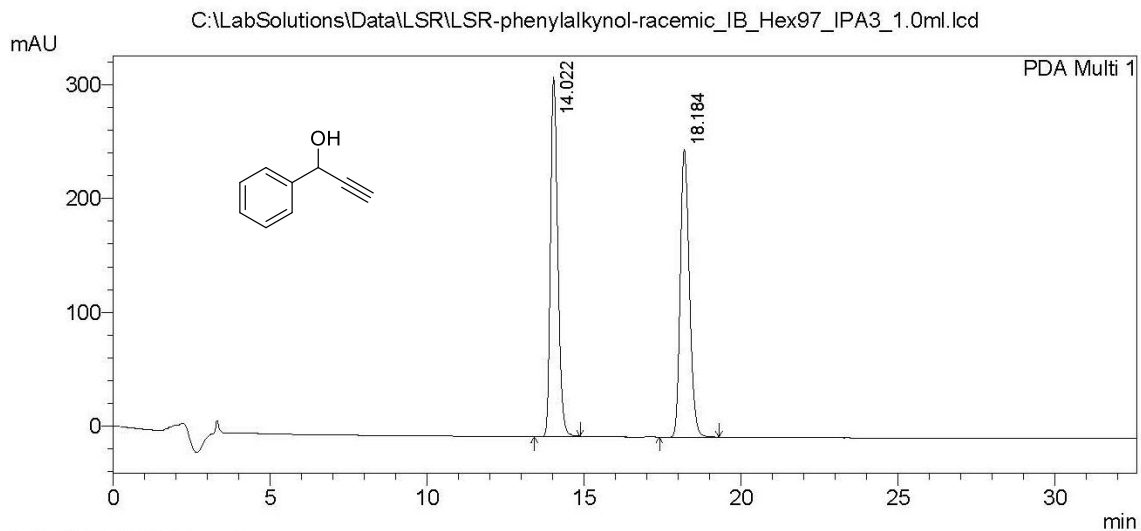

PeakTable

PDA Ch1 210nm 4nm

| Peak# | Ret. Time | Area     | Height | Area %  | Height % |
|-------|-----------|----------|--------|---------|----------|
| 1     | 14.022    | 5100869  | 315702 | 49.885  | 55.530   |
| 2     | 18.184    | 5124310  | 252825 | 50.115  | 44.470   |
| Total |           | 10225179 | 568527 | 100.000 | 100.000  |

### <Chromatogram>

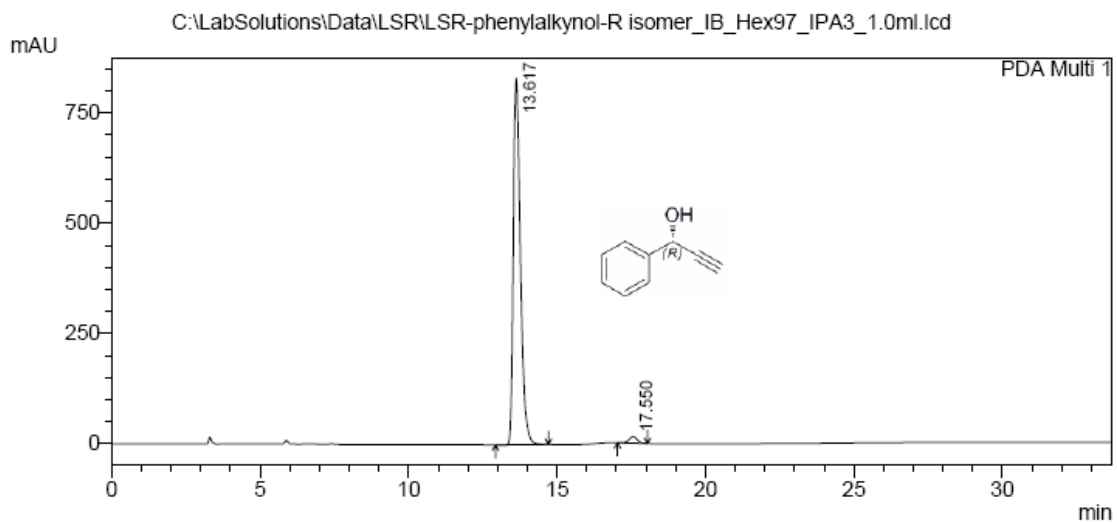

PeakTable

PDA Ch1 210nm 4nm

| Peak# | Ret. Time | Area     | Height | Area %  | Height % |
|-------|-----------|----------|--------|---------|----------|
| 1     | 13.617    | 13806858 | 830934 | 98.023  | 98.252   |
| 2     | 17.550    | 278435   | 14780  | 1.977   | 1.748    |
| Total |           | 14085293 | 845714 | 100.000 | 100.000  |

<Chromatogram>

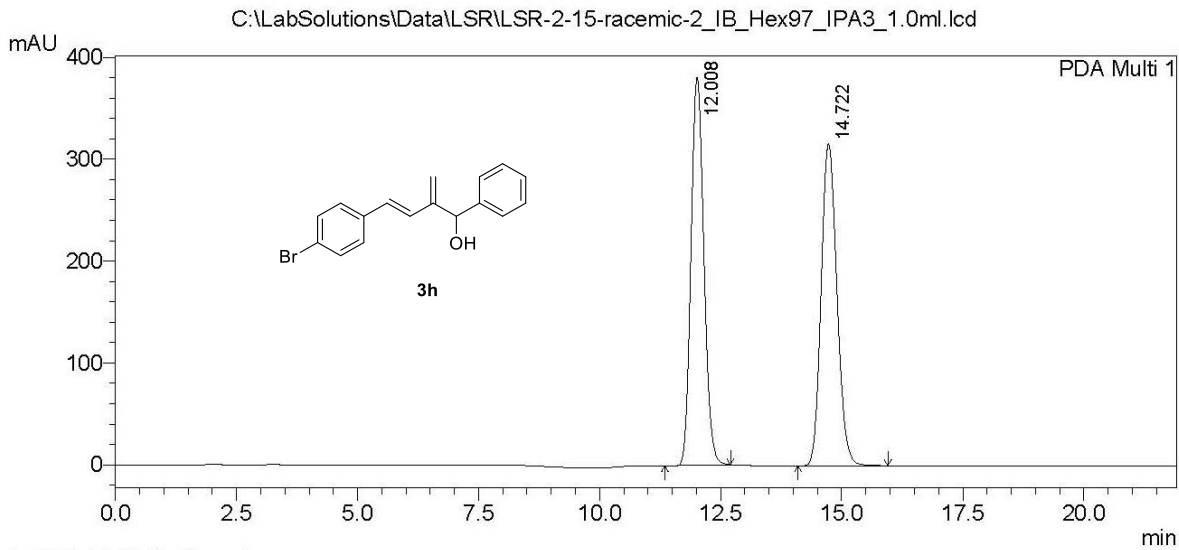

PeakTable

PDA Ch1 280nm 4nm

| Peak# | Ret. Time | Area     | Height | Area %  | Height % |
|-------|-----------|----------|--------|---------|----------|
| 1     | 12.008    | 7028704  | 380142 | 49.621  | 54.605   |
| 2     | 14.722    | 7135957  | 316021 | 50.379  | 45.395   |
| Total |           | 14164661 | 696163 | 100.000 | 100.000  |

<Chromatogram>

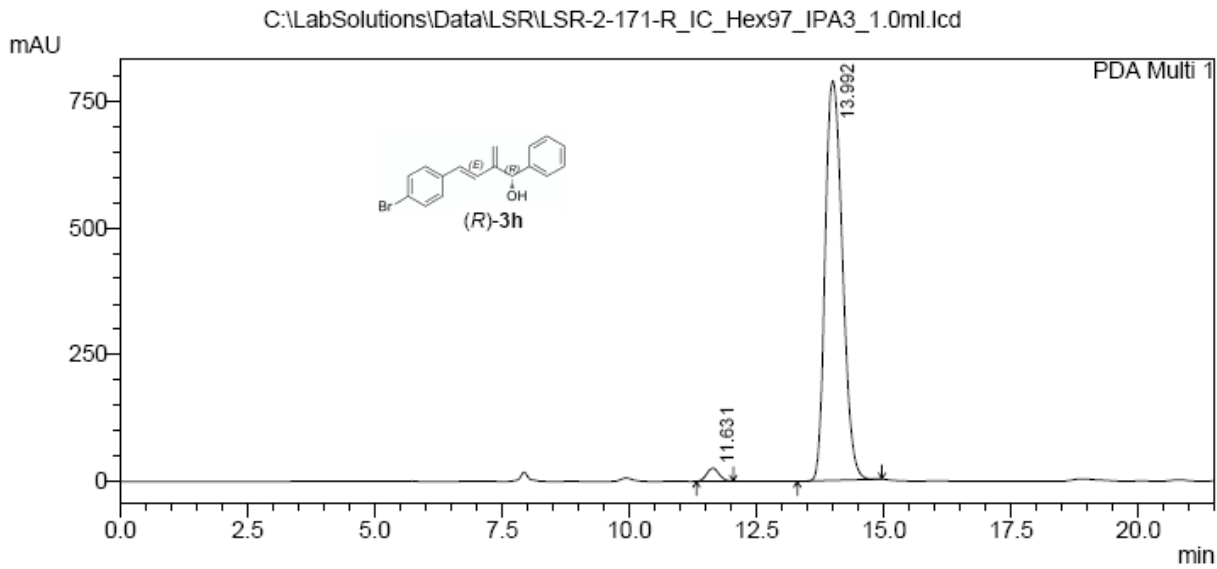

PeakTable

PDA Ch1 278nm 4nm

| Peak# | Ret. Time | Area     | Height | Area %  | Height % |
|-------|-----------|----------|--------|---------|----------|
| 1     | 11.631    | 440702   | 26145  | 2.320   | 3.212    |
| 2     | 13.992    | 18556004 | 787768 | 97.680  | 96.788   |
| Total |           | 18996706 | 813913 | 100.000 | 100.000  |

| Parameter                | Value       |
|--------------------------|-------------|
| 1 Title                  | LSR2-56-ST1 |
| 2 Solvent                | acetone     |
| 3 Relaxation Delay       | 4.8000      |
| 4 Spectrometer Frequency | 399.78      |

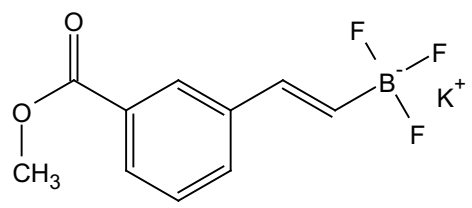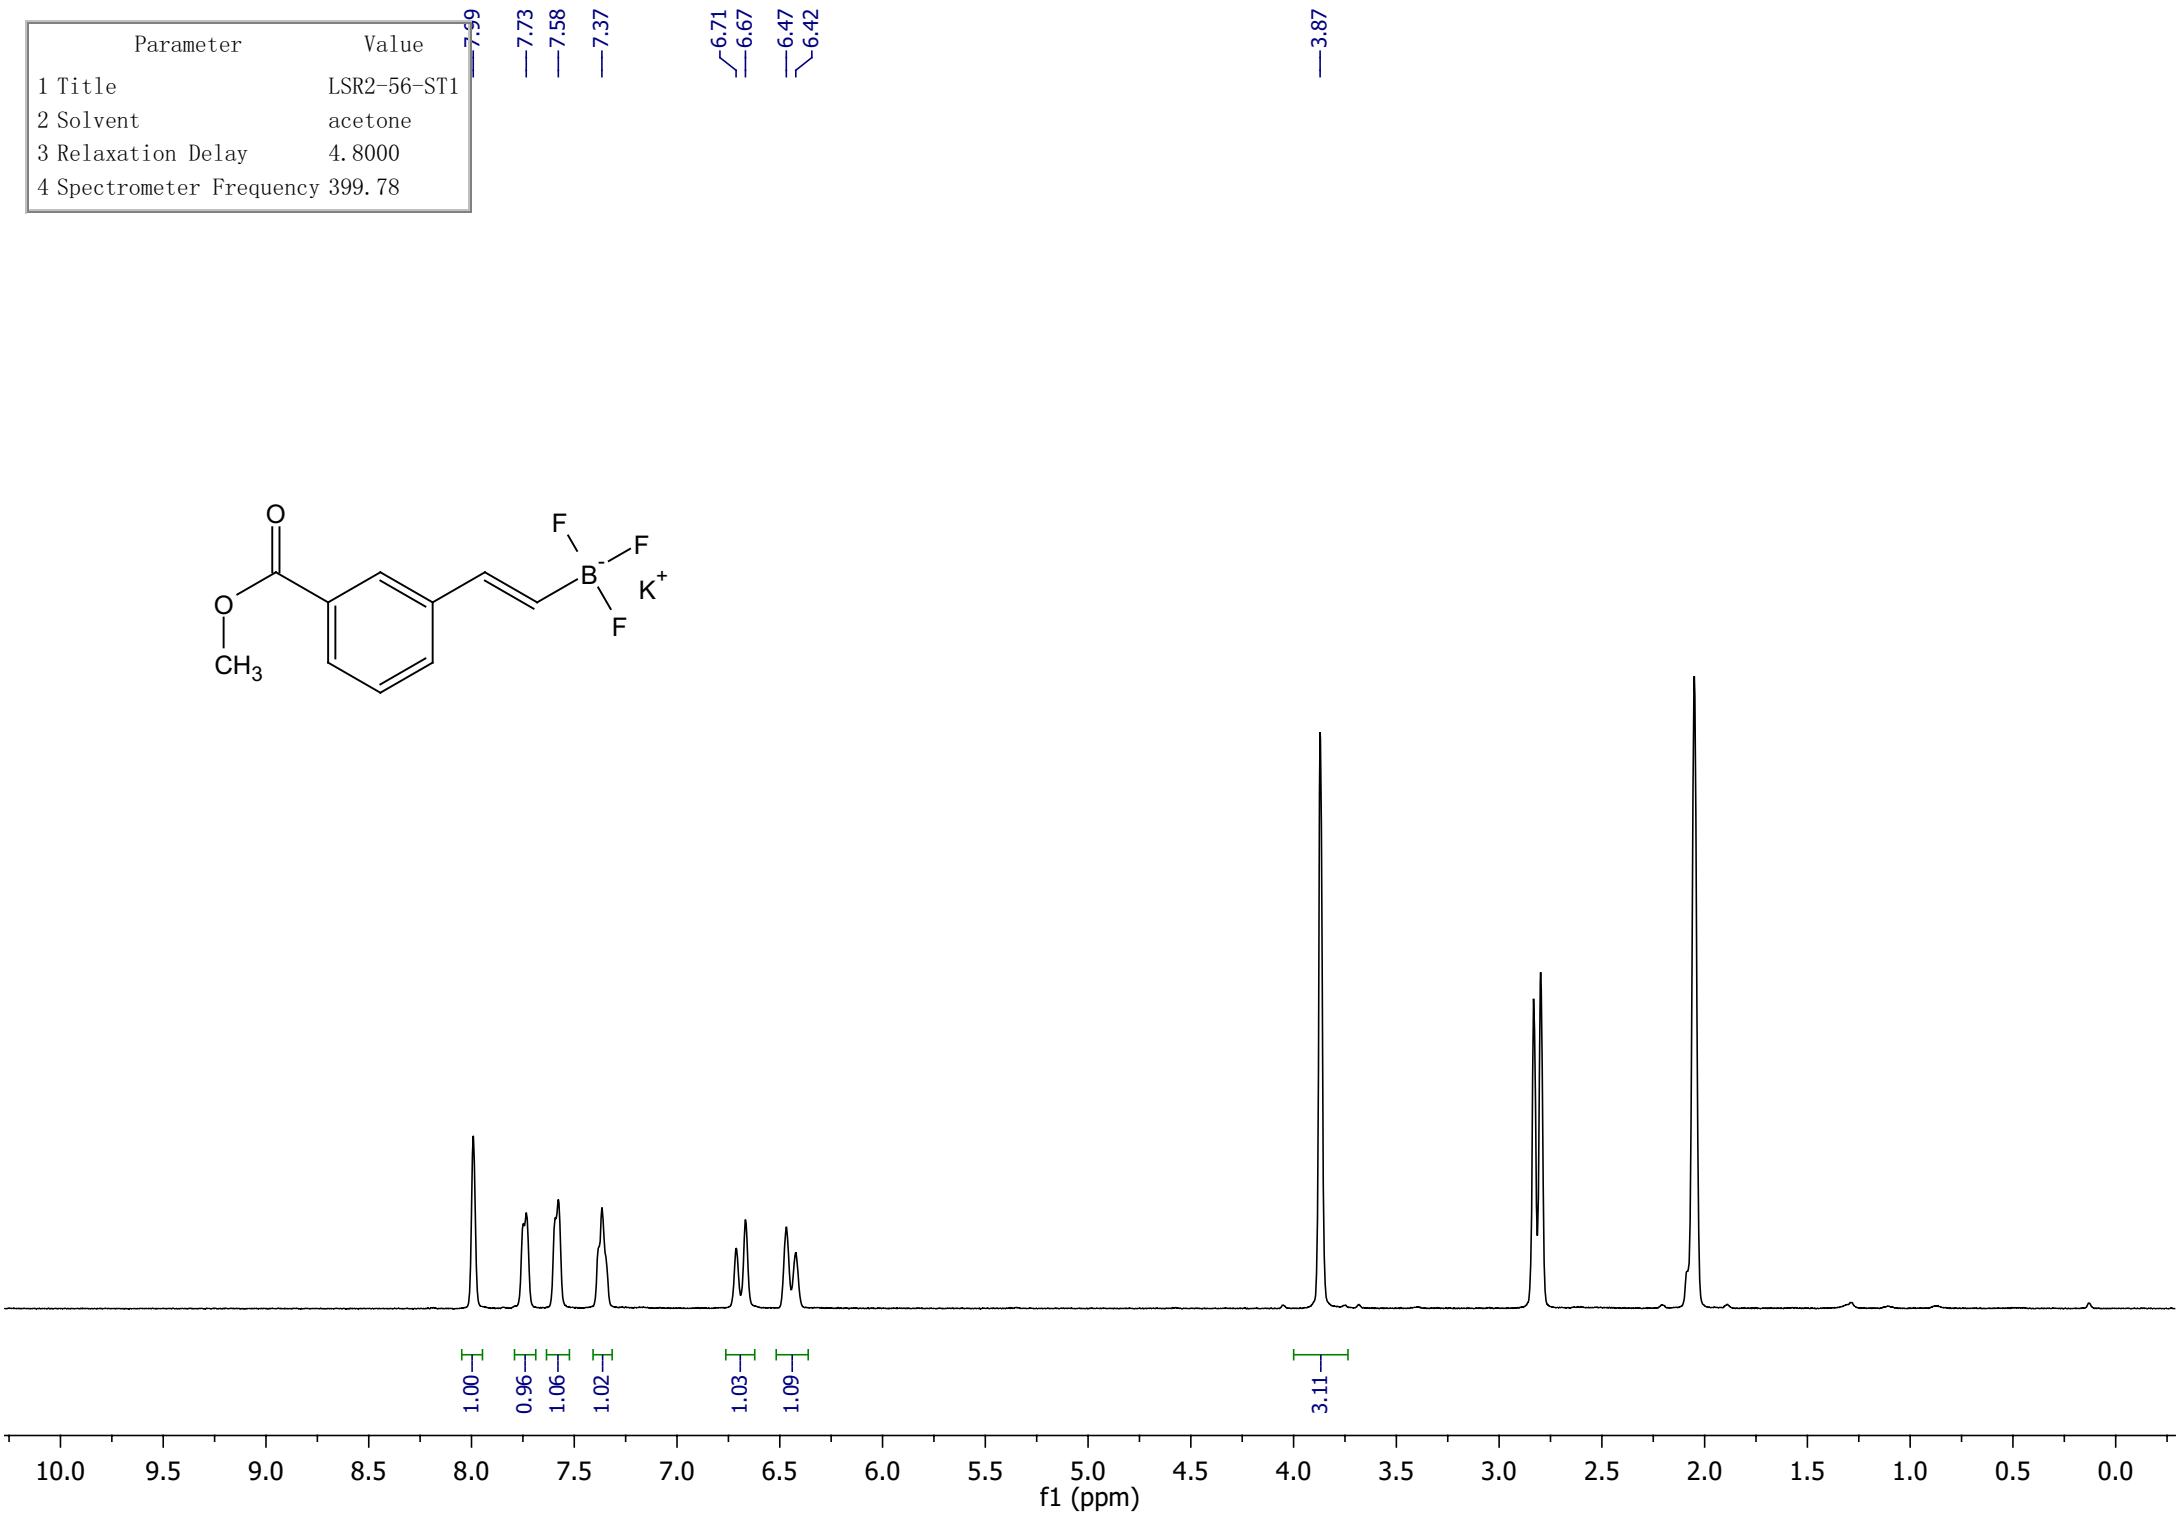

| Parameter                | Value      |
|--------------------------|------------|
| 1 Title                  | LSR2-20-6C |
| 2 Solvent                | acetone    |
| 3 Relaxation Delay       | 1.0000     |
| 4 Spectrometer Frequency | 125.70     |

167.90  
142.54  
134.29  
134.25  
134.22  
134.18  
131.48  
131.29  
129.57  
127.88  
127.63  
52.56

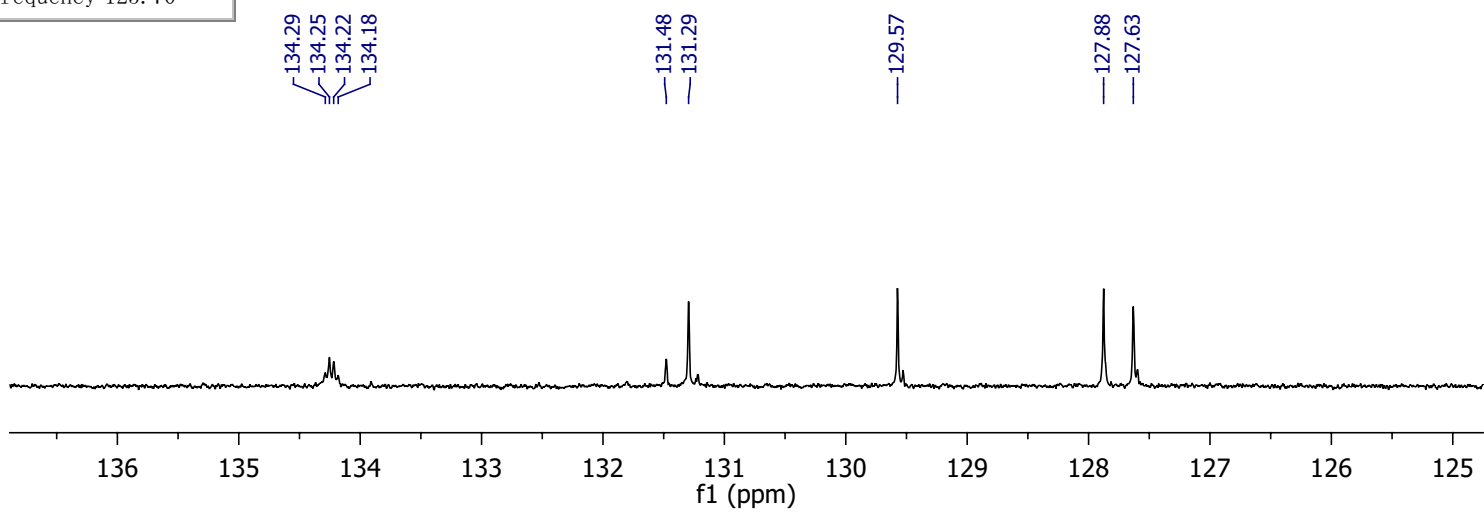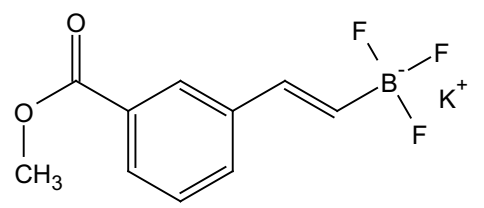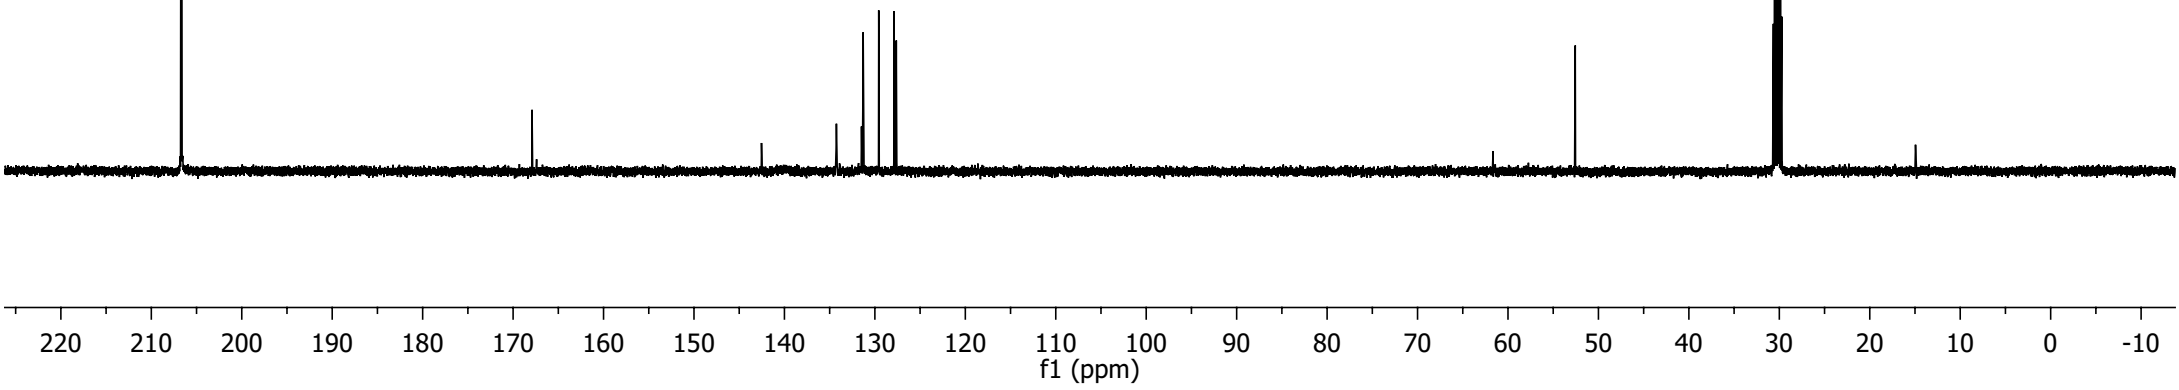

| Parameter                | Value          |
|--------------------------|----------------|
| 1 Title                  | LSR2-120-2-F19 |
| 2 Solvent                | acetone        |
| 3 Relaxation Delay       | 4.8000         |
| 4 Spectrometer Frequency | 376.11         |

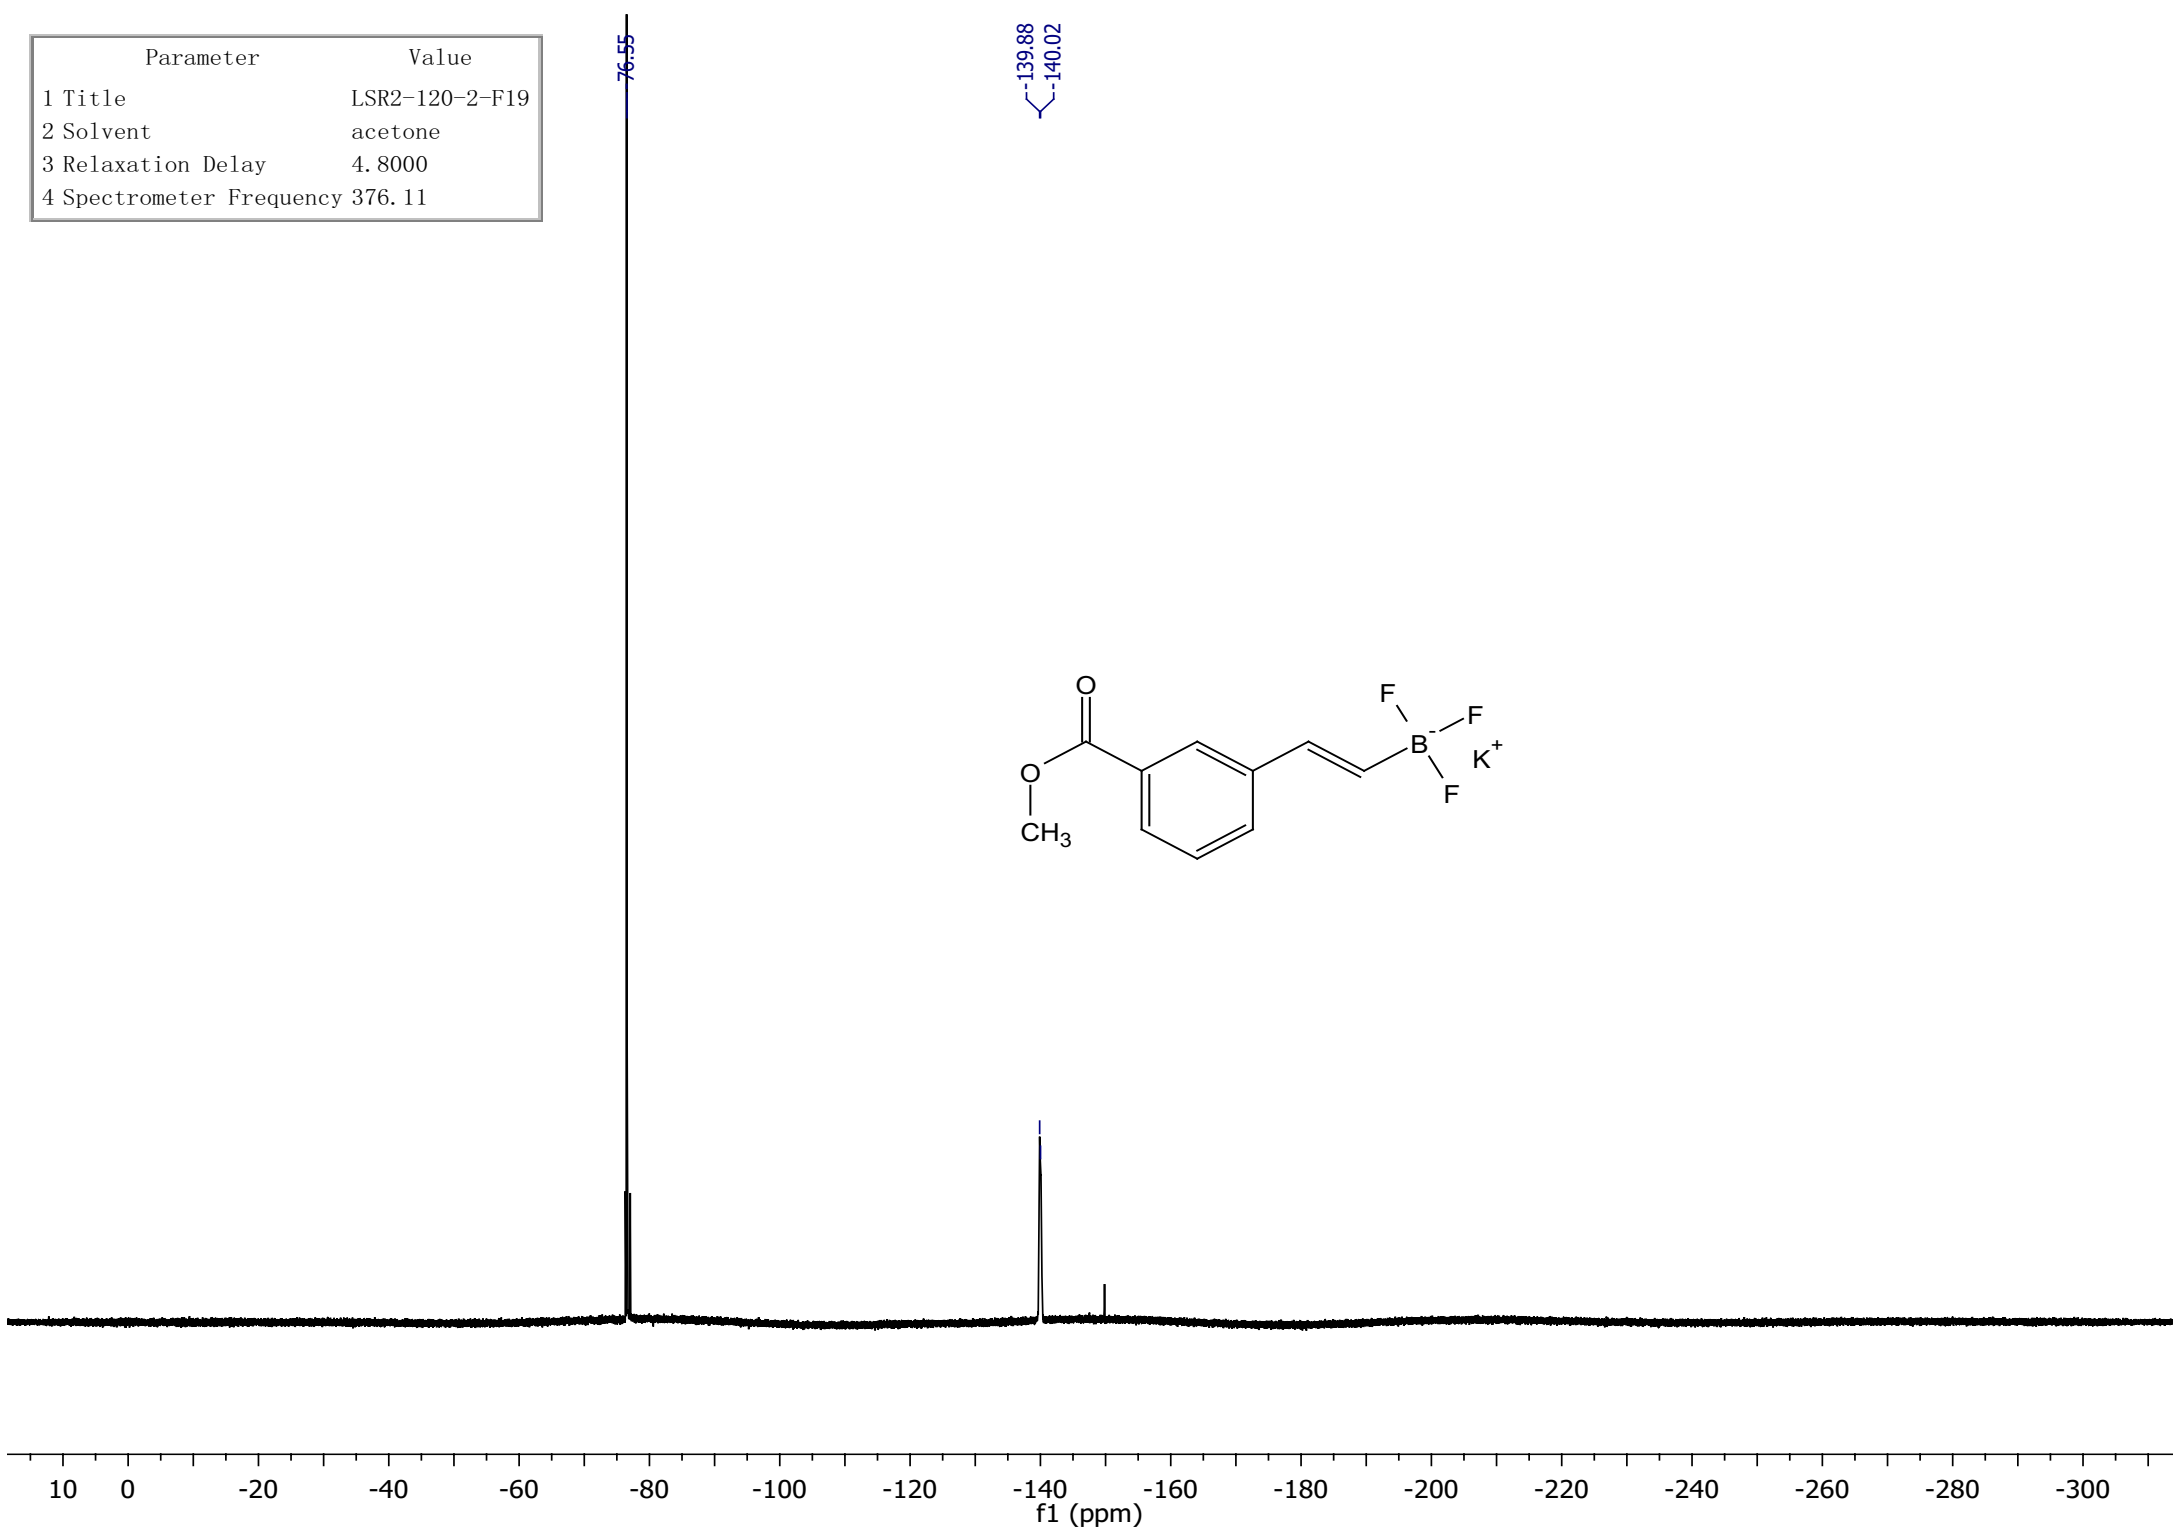



| Parameter                | Value        |
|--------------------------|--------------|
| 1 Title                  | LSR2-129-ST2 |
| 2 Solvent                | acetone      |
| 3 Relaxation Delay       | 4.8000       |
| 4 Spectrometer Frequency | 399.78       |

7.29  
7.28  
7.27  
7.27  
7.23  
7.22  
7.03  
7.02  
6.68  
6.64  
6.14  
6.13  
6.12  
6.11  
6.09  
6.08  
6.07  
6.07

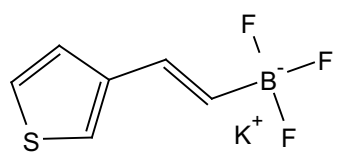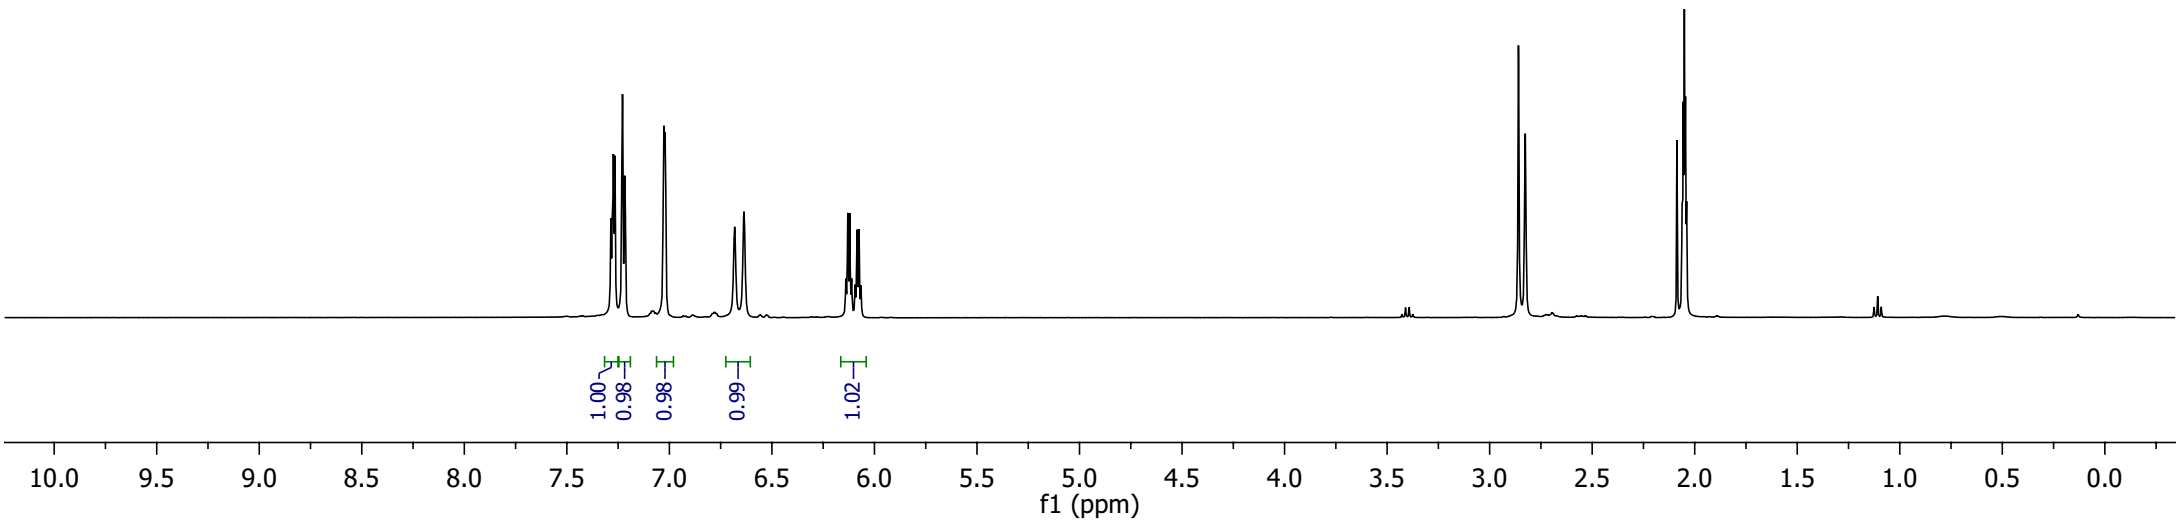

| Parameter                | Value          |
|--------------------------|----------------|
| 1 Title                  | LSR2-129-ST2-C |
| 2 Solvent                | acetone        |
| 3 Relaxation Delay       | 1.0000         |
| 4 Spectrometer Frequency | 100.54         |

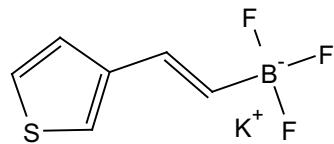

145.87  
129.57  
129.52  
129.48  
129.43  
126.54  
126.11  
119.96

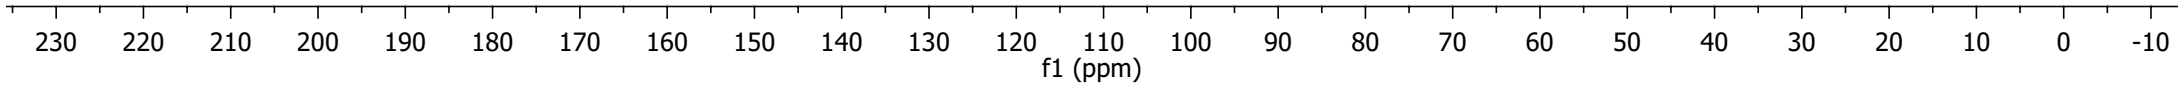

| Parameter                | Value        |
|--------------------------|--------------|
| 1 Title                  | LSR2-129-F19 |
| 2 Solvent                | dmsO         |
| 3 Relaxation Delay       | 4.8000       |
| 4 Spectrometer Frequency | 376.11       |

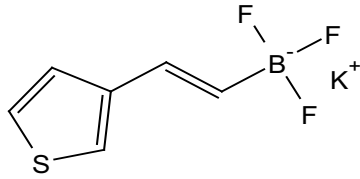

-136.04

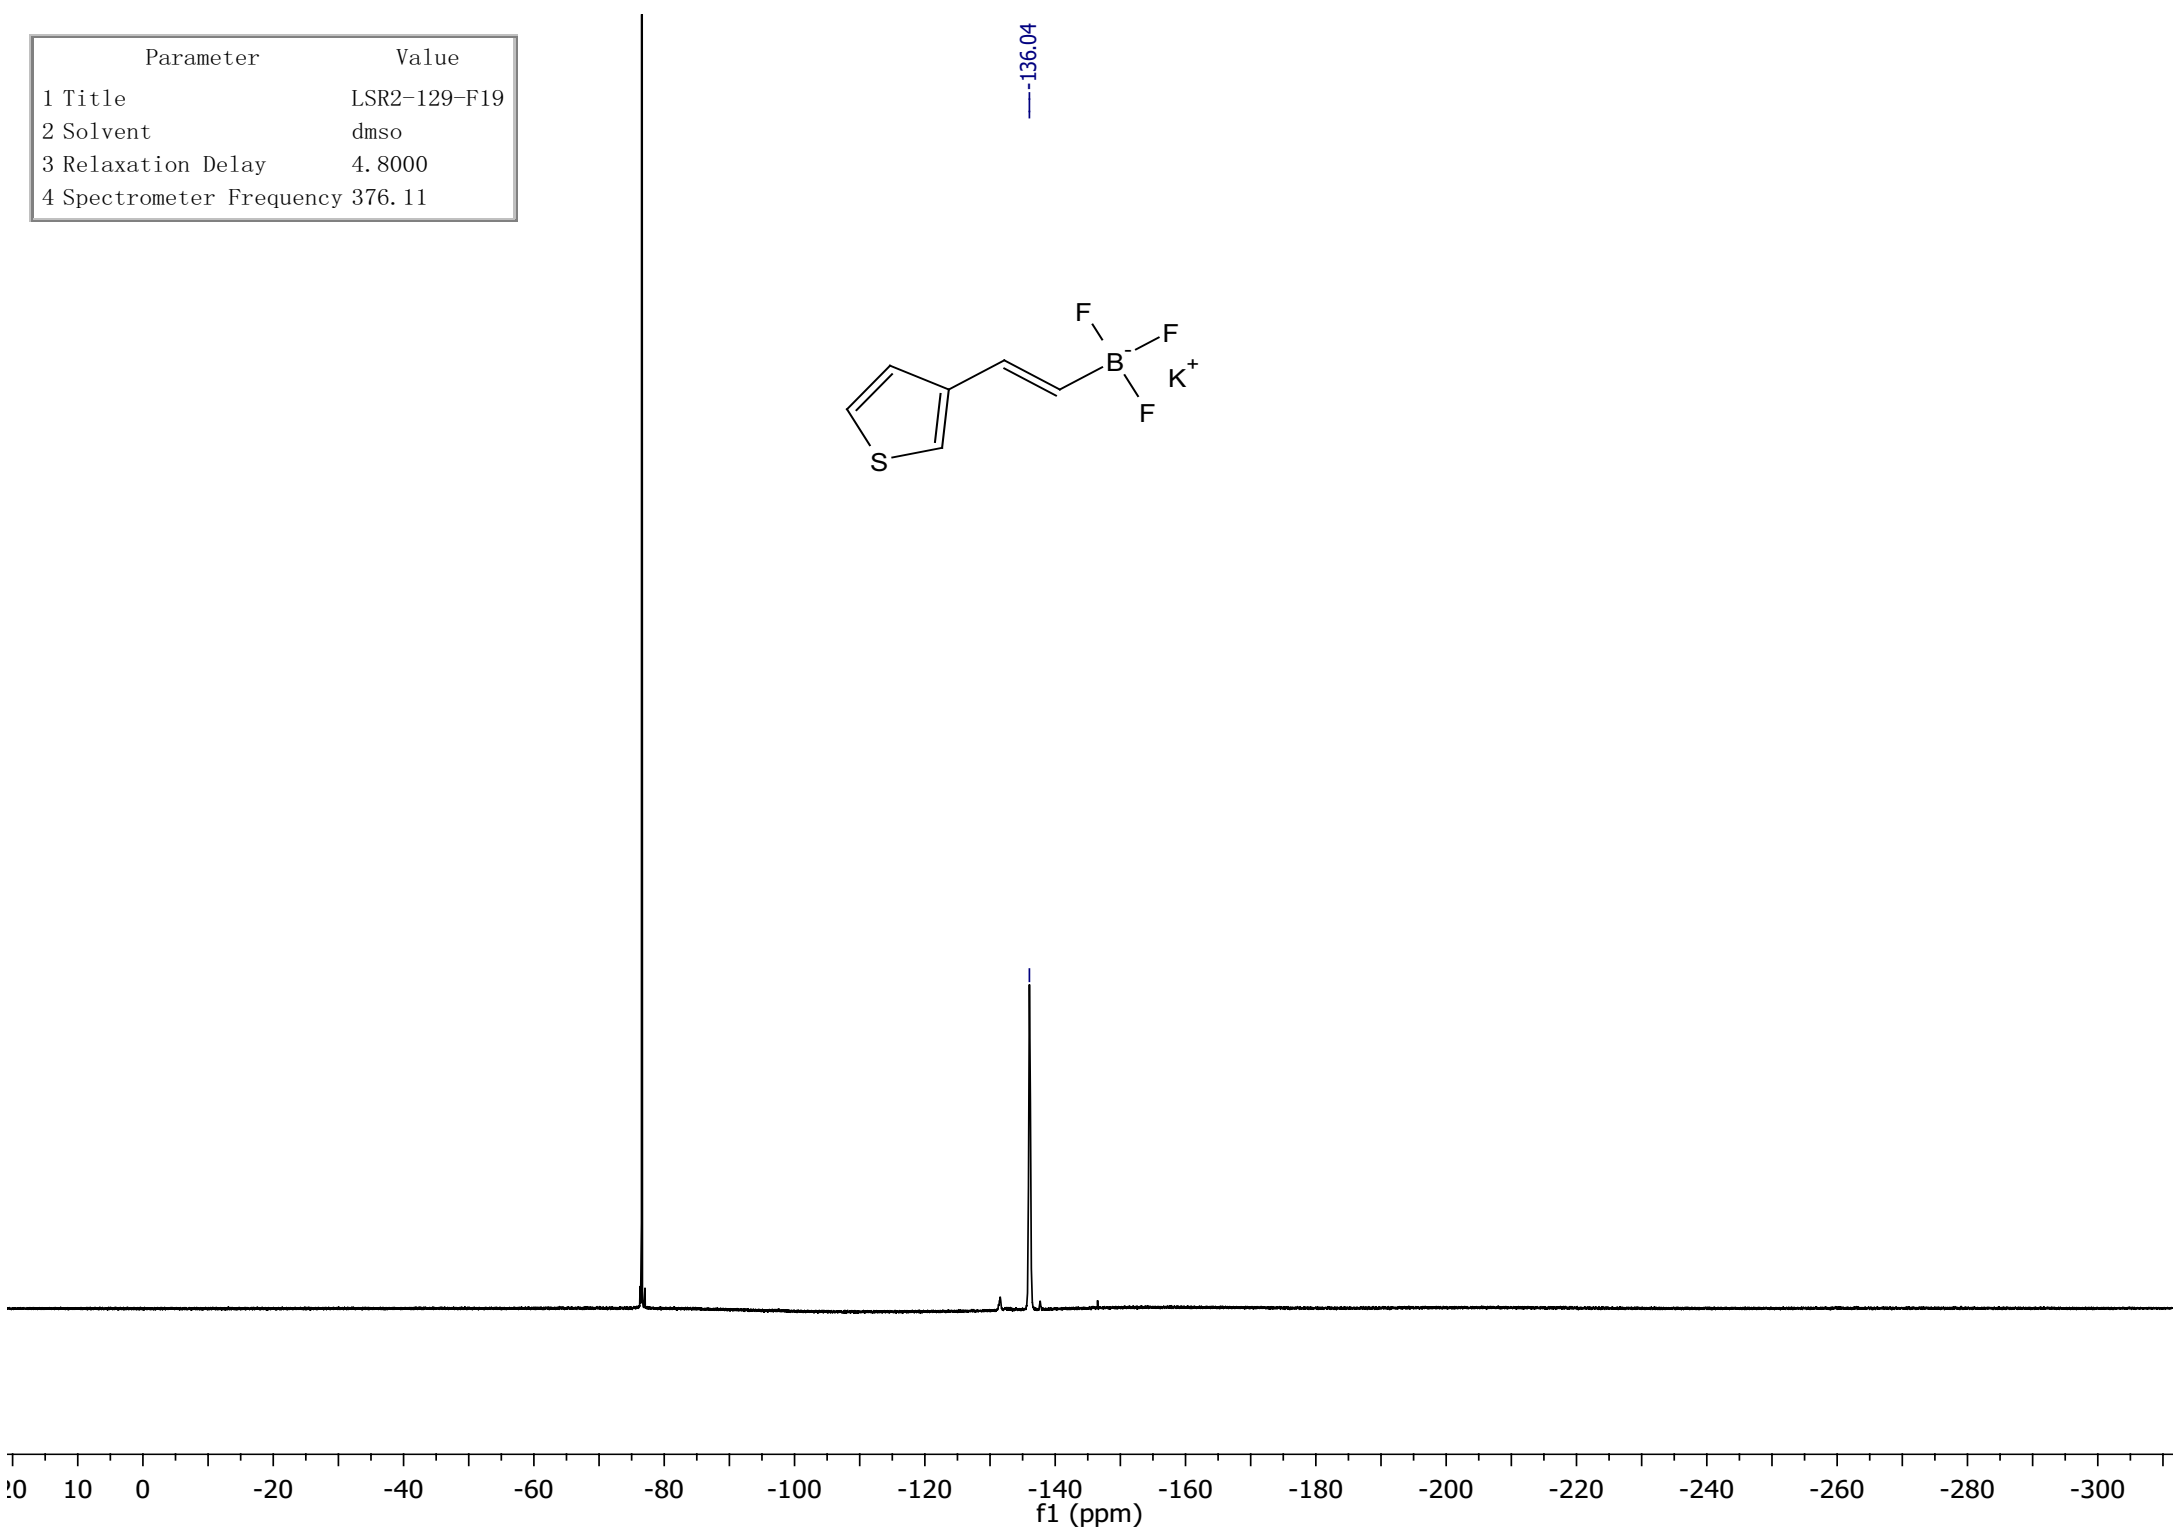

| Parameter                | Value        |
|--------------------------|--------------|
| 1 Title                  | LSR2-138-ST1 |
| 2 Solvent                | acetone      |
| 3 Relaxation Delay       | 4.8000       |
| 4 Spectrometer Frequency | 399.78       |

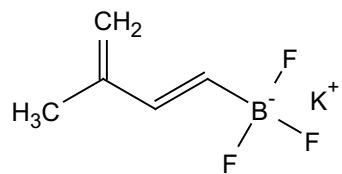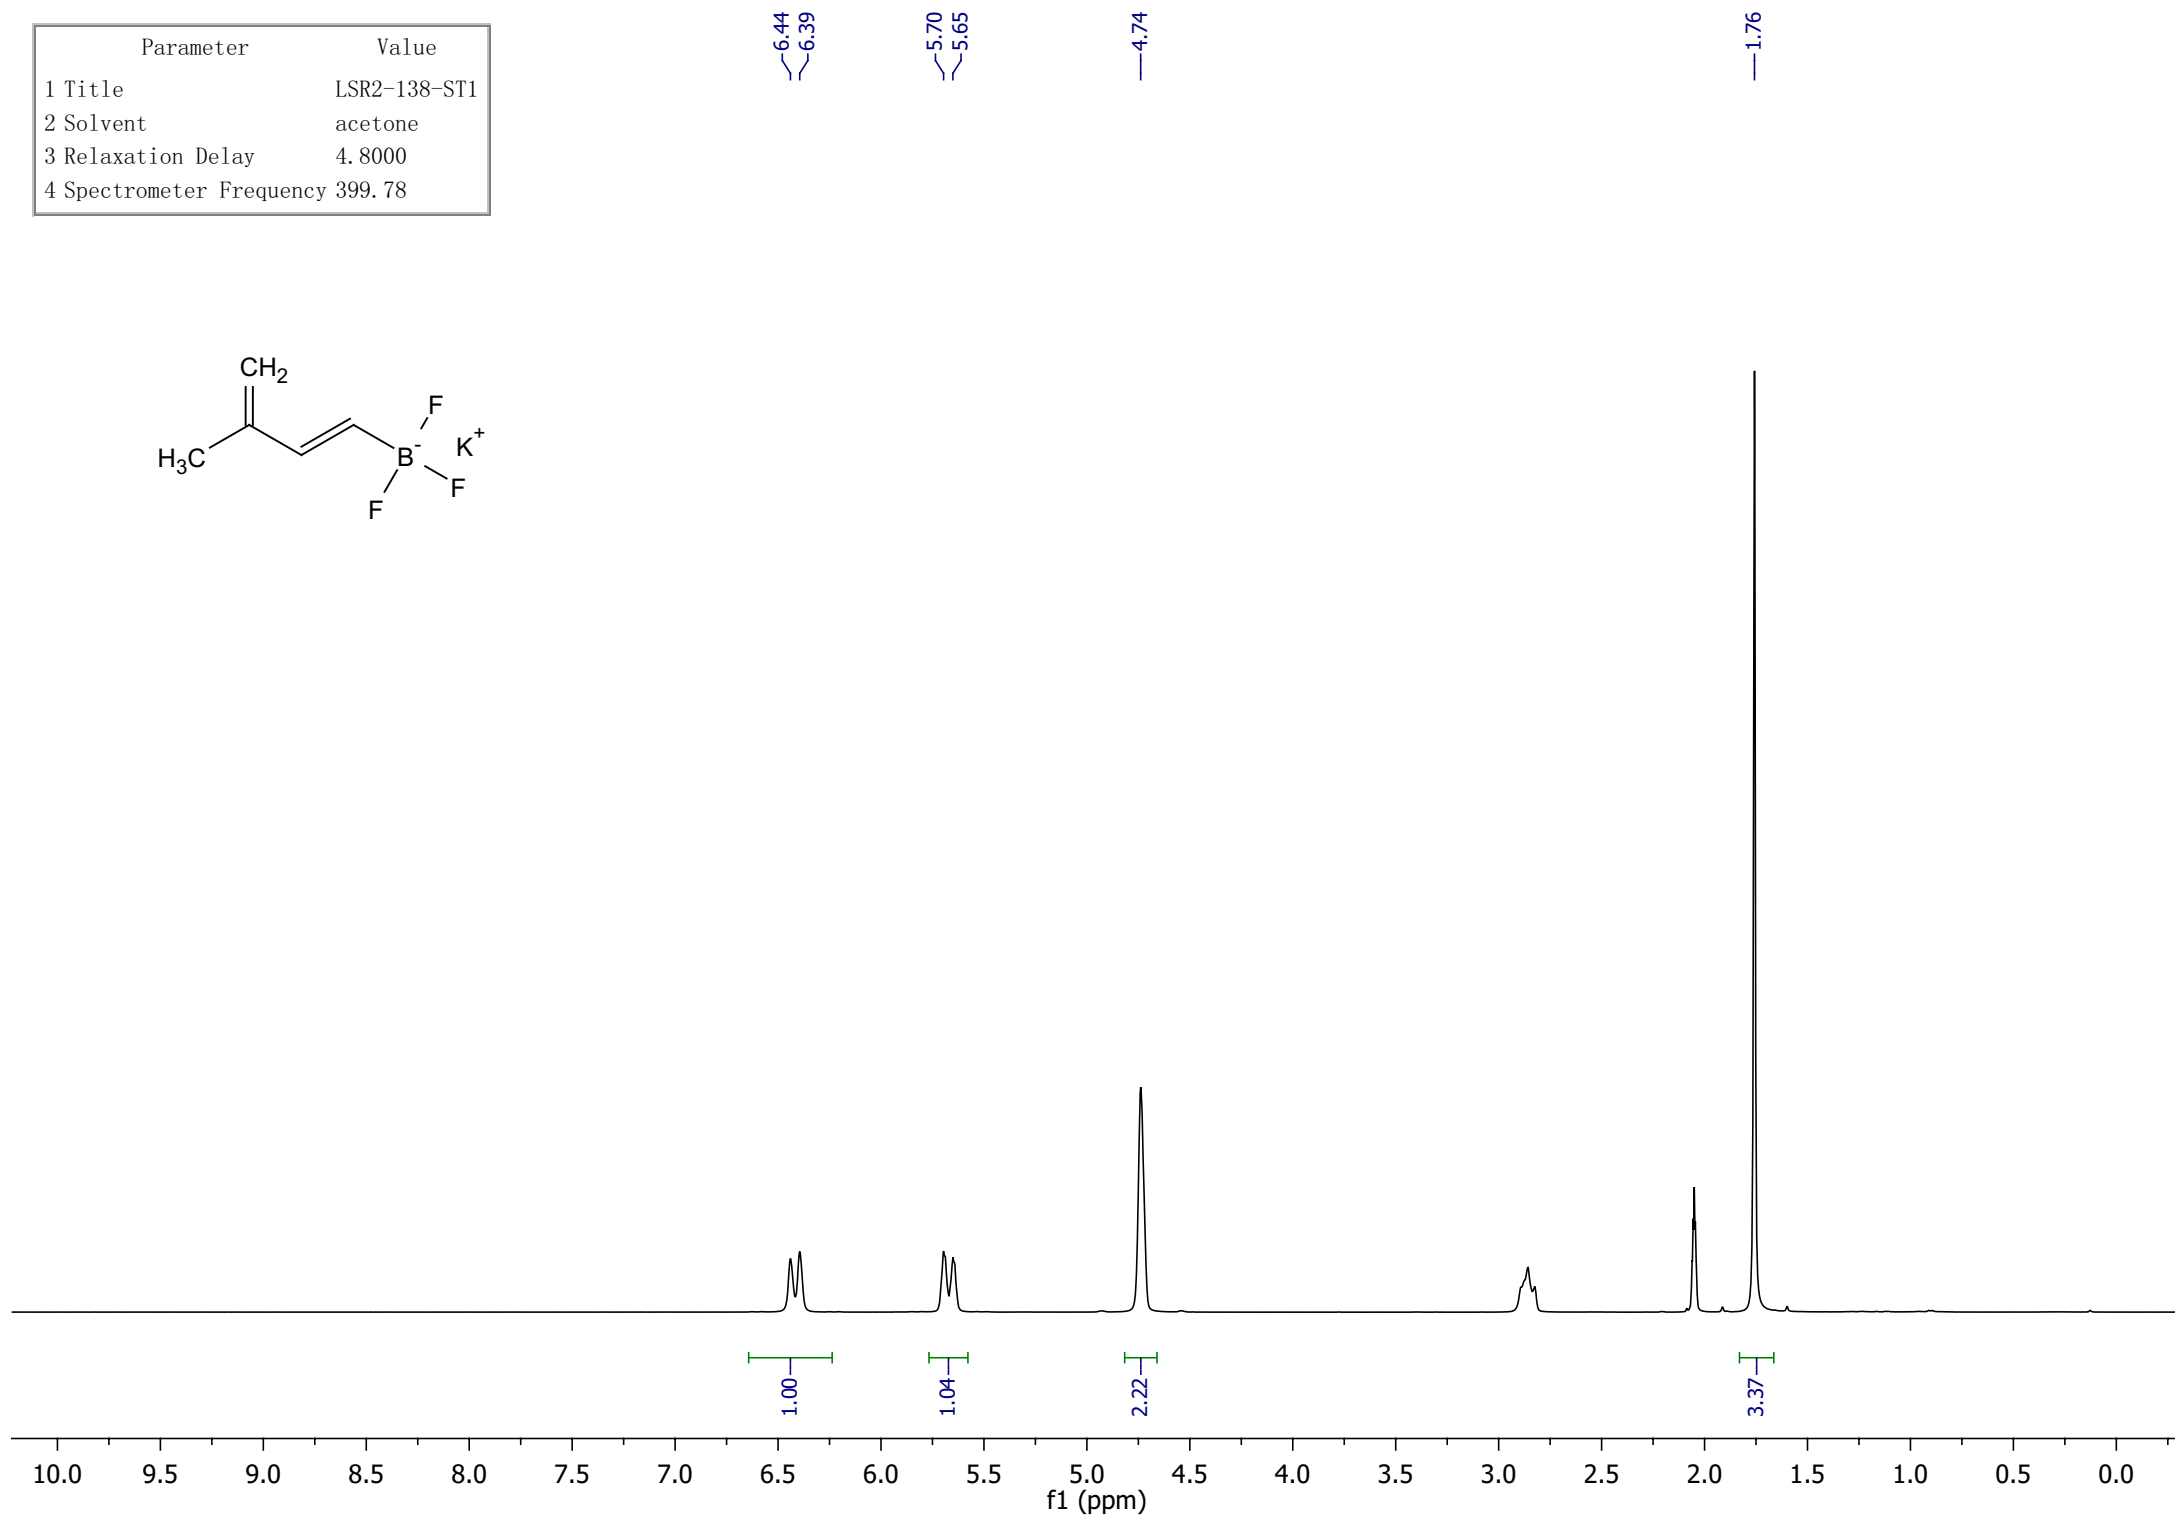

| Parameter                | Value           |
|--------------------------|-----------------|
| 1 Title                  | LSR2-138-ST1-C3 |
| 2 Solvent                | acetone         |
| 3 Relaxation Delay       | 1.0000          |
| 4 Spectrometer Frequency | 100.54          |

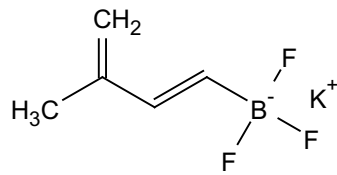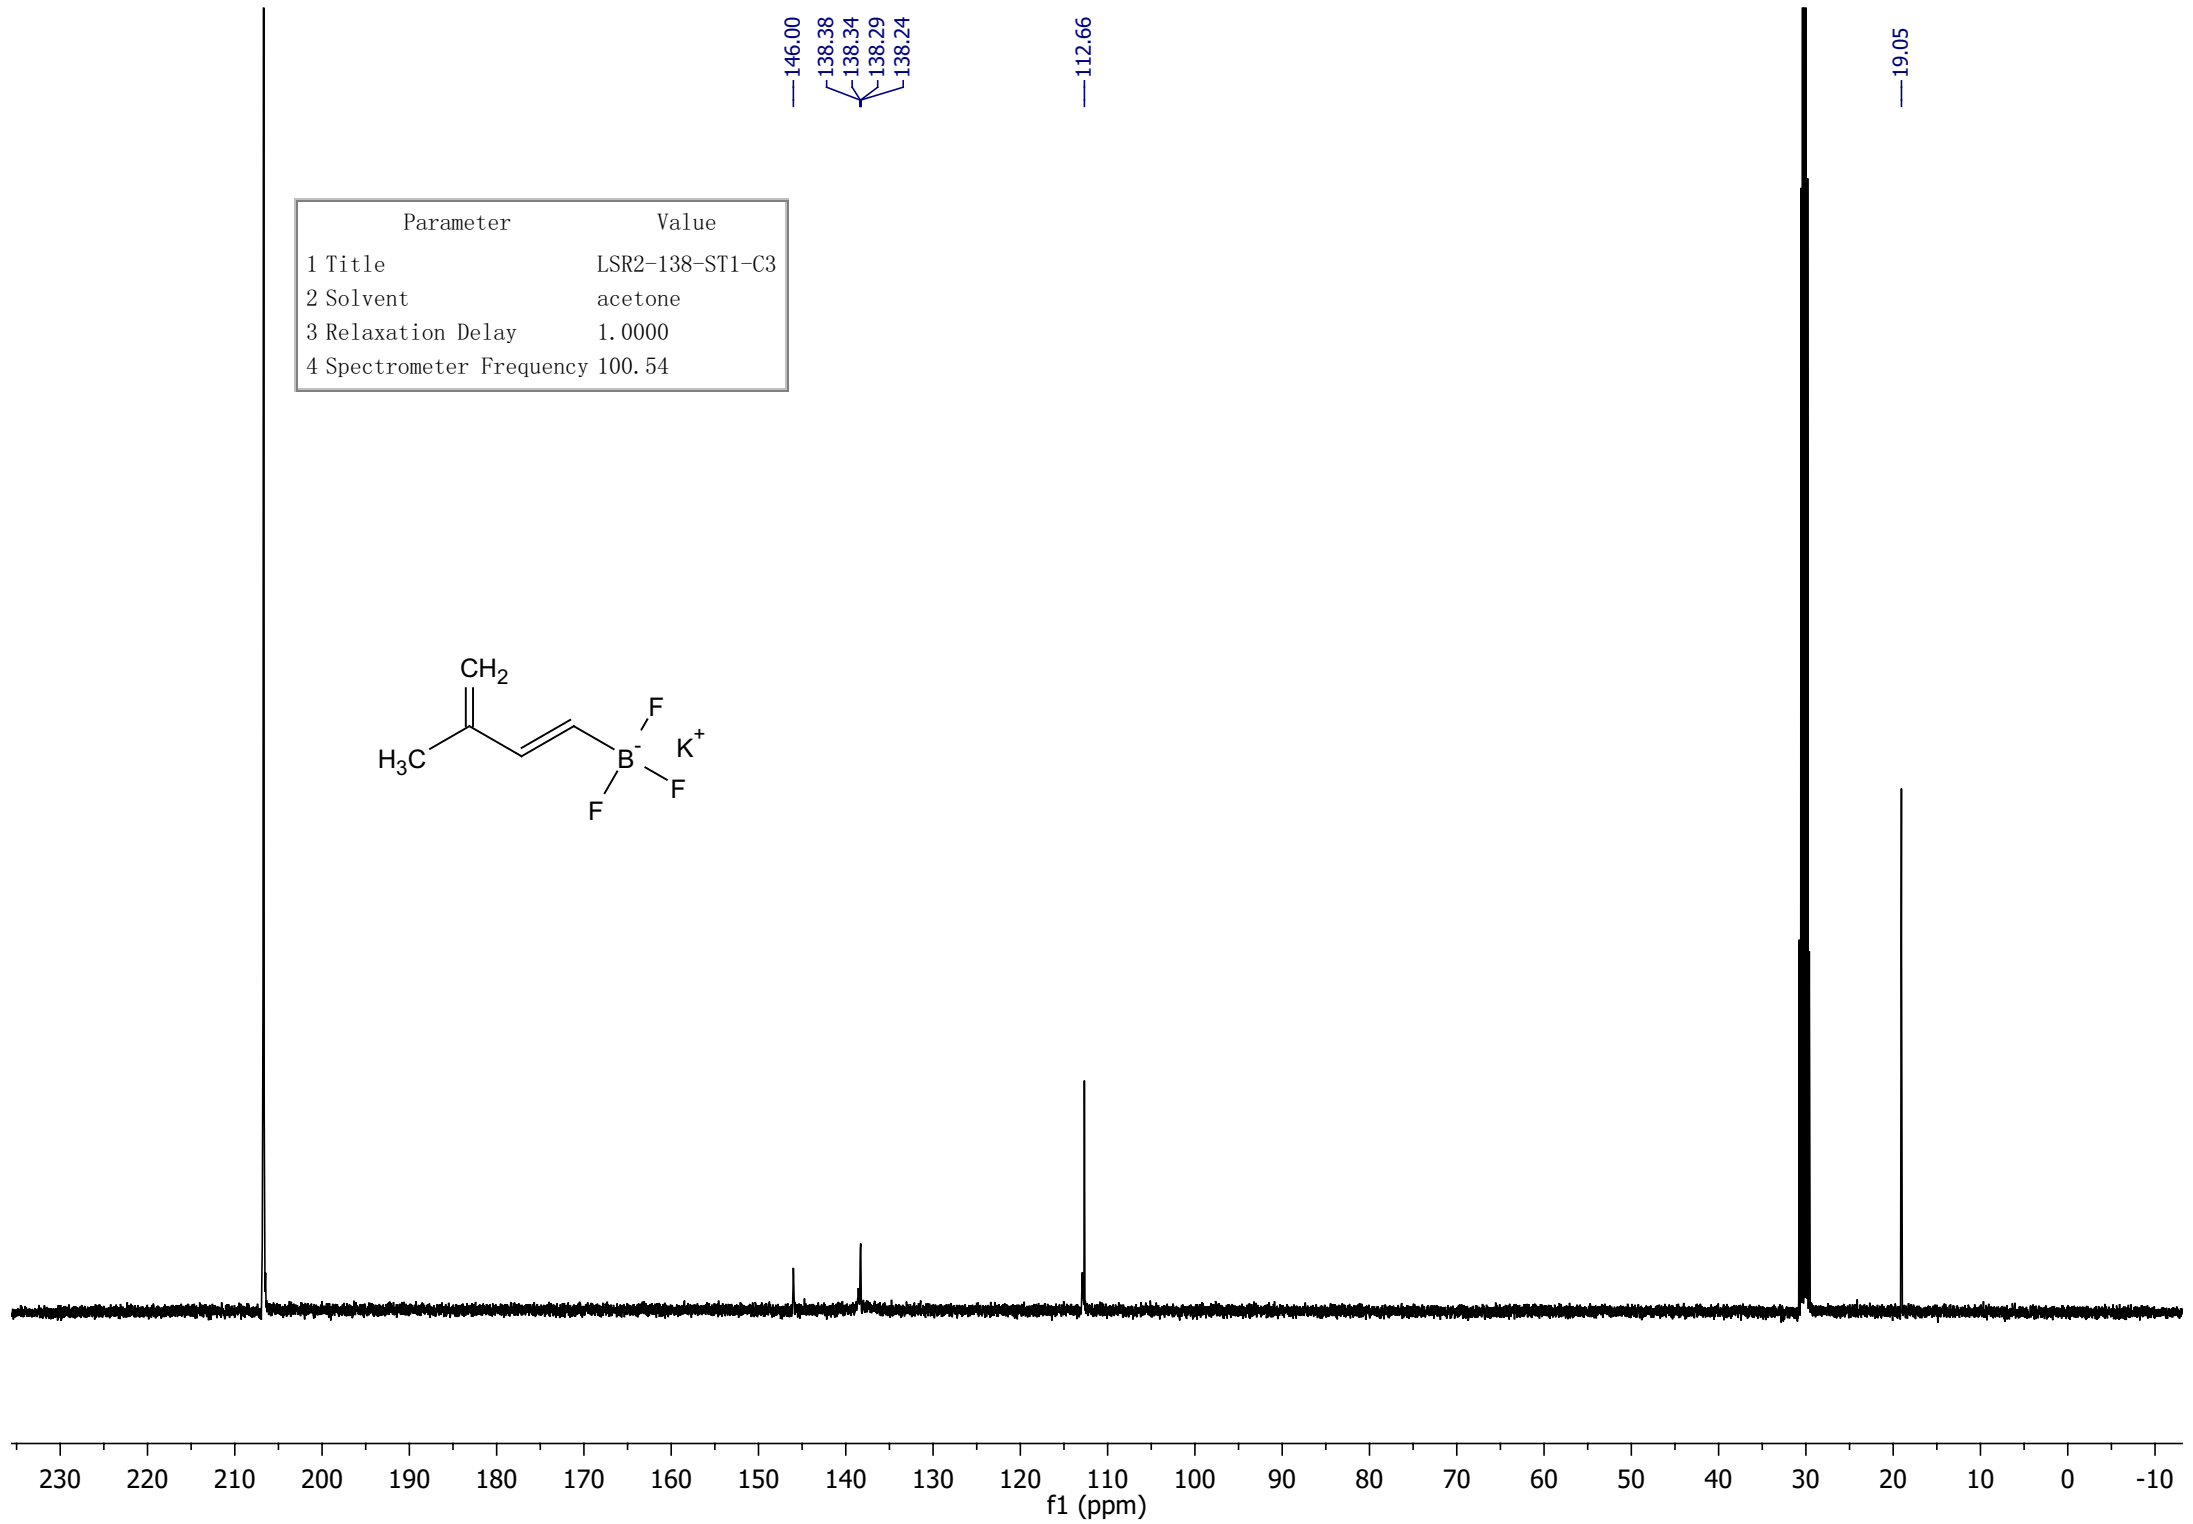

| Parameter                | Value          |
|--------------------------|----------------|
| 1 Title                  | LSR2-138-F19-2 |
| 2 Solvent                | acetone        |
| 3 Relaxation Delay       | 4.8000         |
| 4 Spectrometer Frequency | 376.11         |

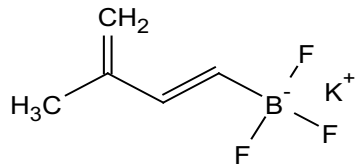

139.26  
139.37  
139.53  
139.66

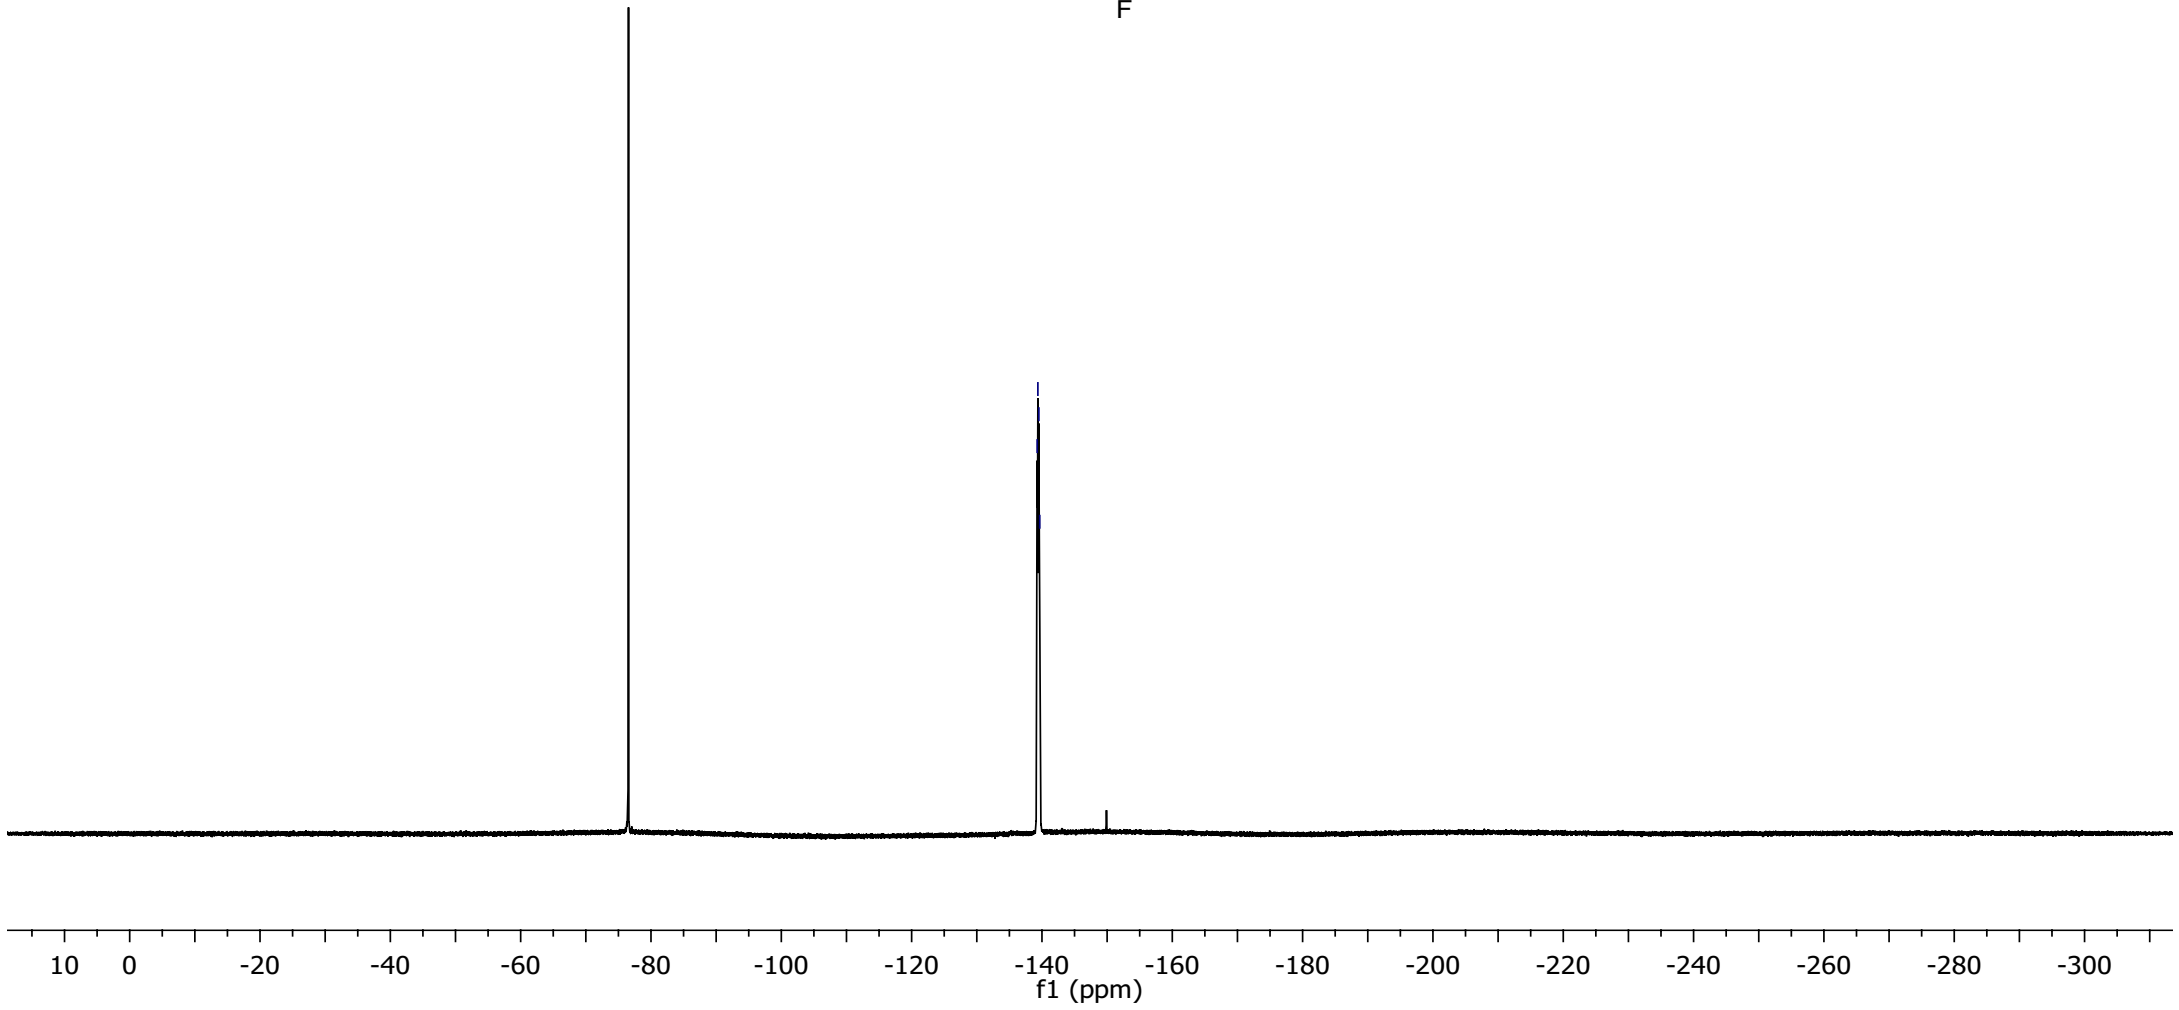

| Parameter                | Value        |
|--------------------------|--------------|
| 1 Title                  | LSR2-162-TM1 |
| 2 Solvent                | dmsO         |
| 3 Relaxation Delay       | 4.8000       |
| 4 Spectrometer Frequency | 499.86       |

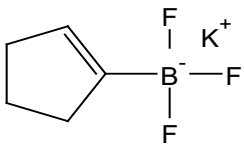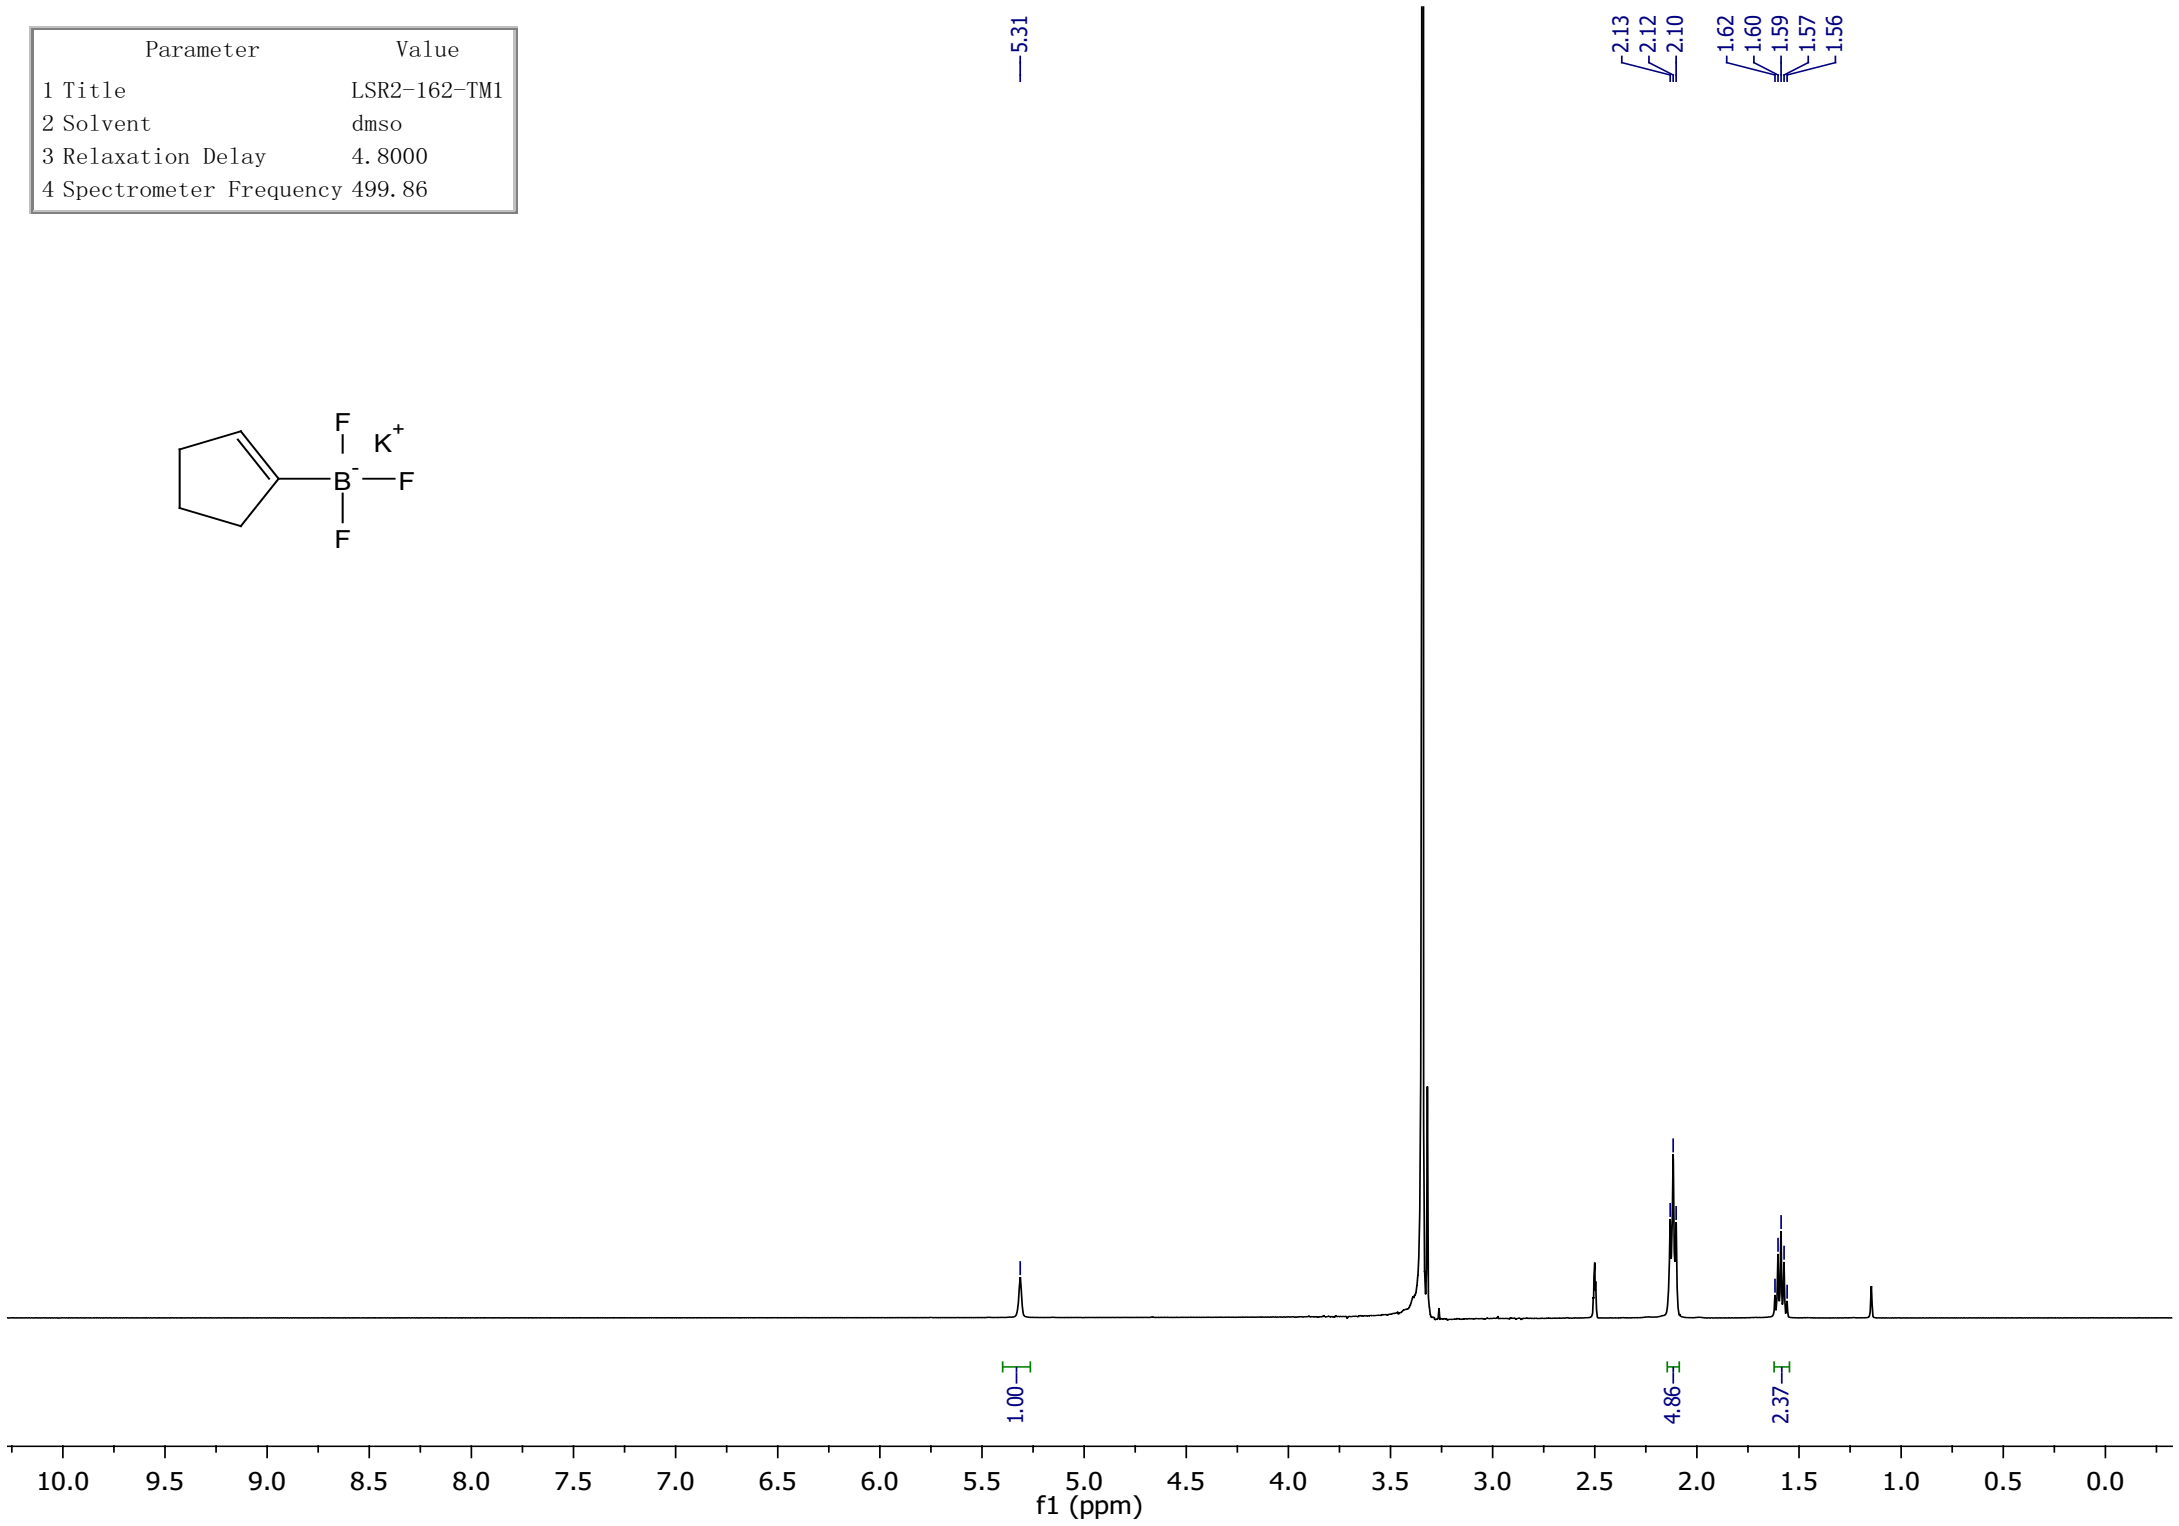

| Parameter                | Value          |
|--------------------------|----------------|
| 1 Title                  | LSR2-162-TM1-C |
| 2 Solvent                | dms0           |
| 3 Relaxation Delay       | 1.0000         |
| 4 Spectrometer Frequency | 125.70         |

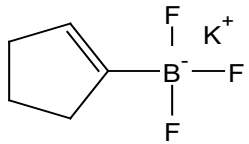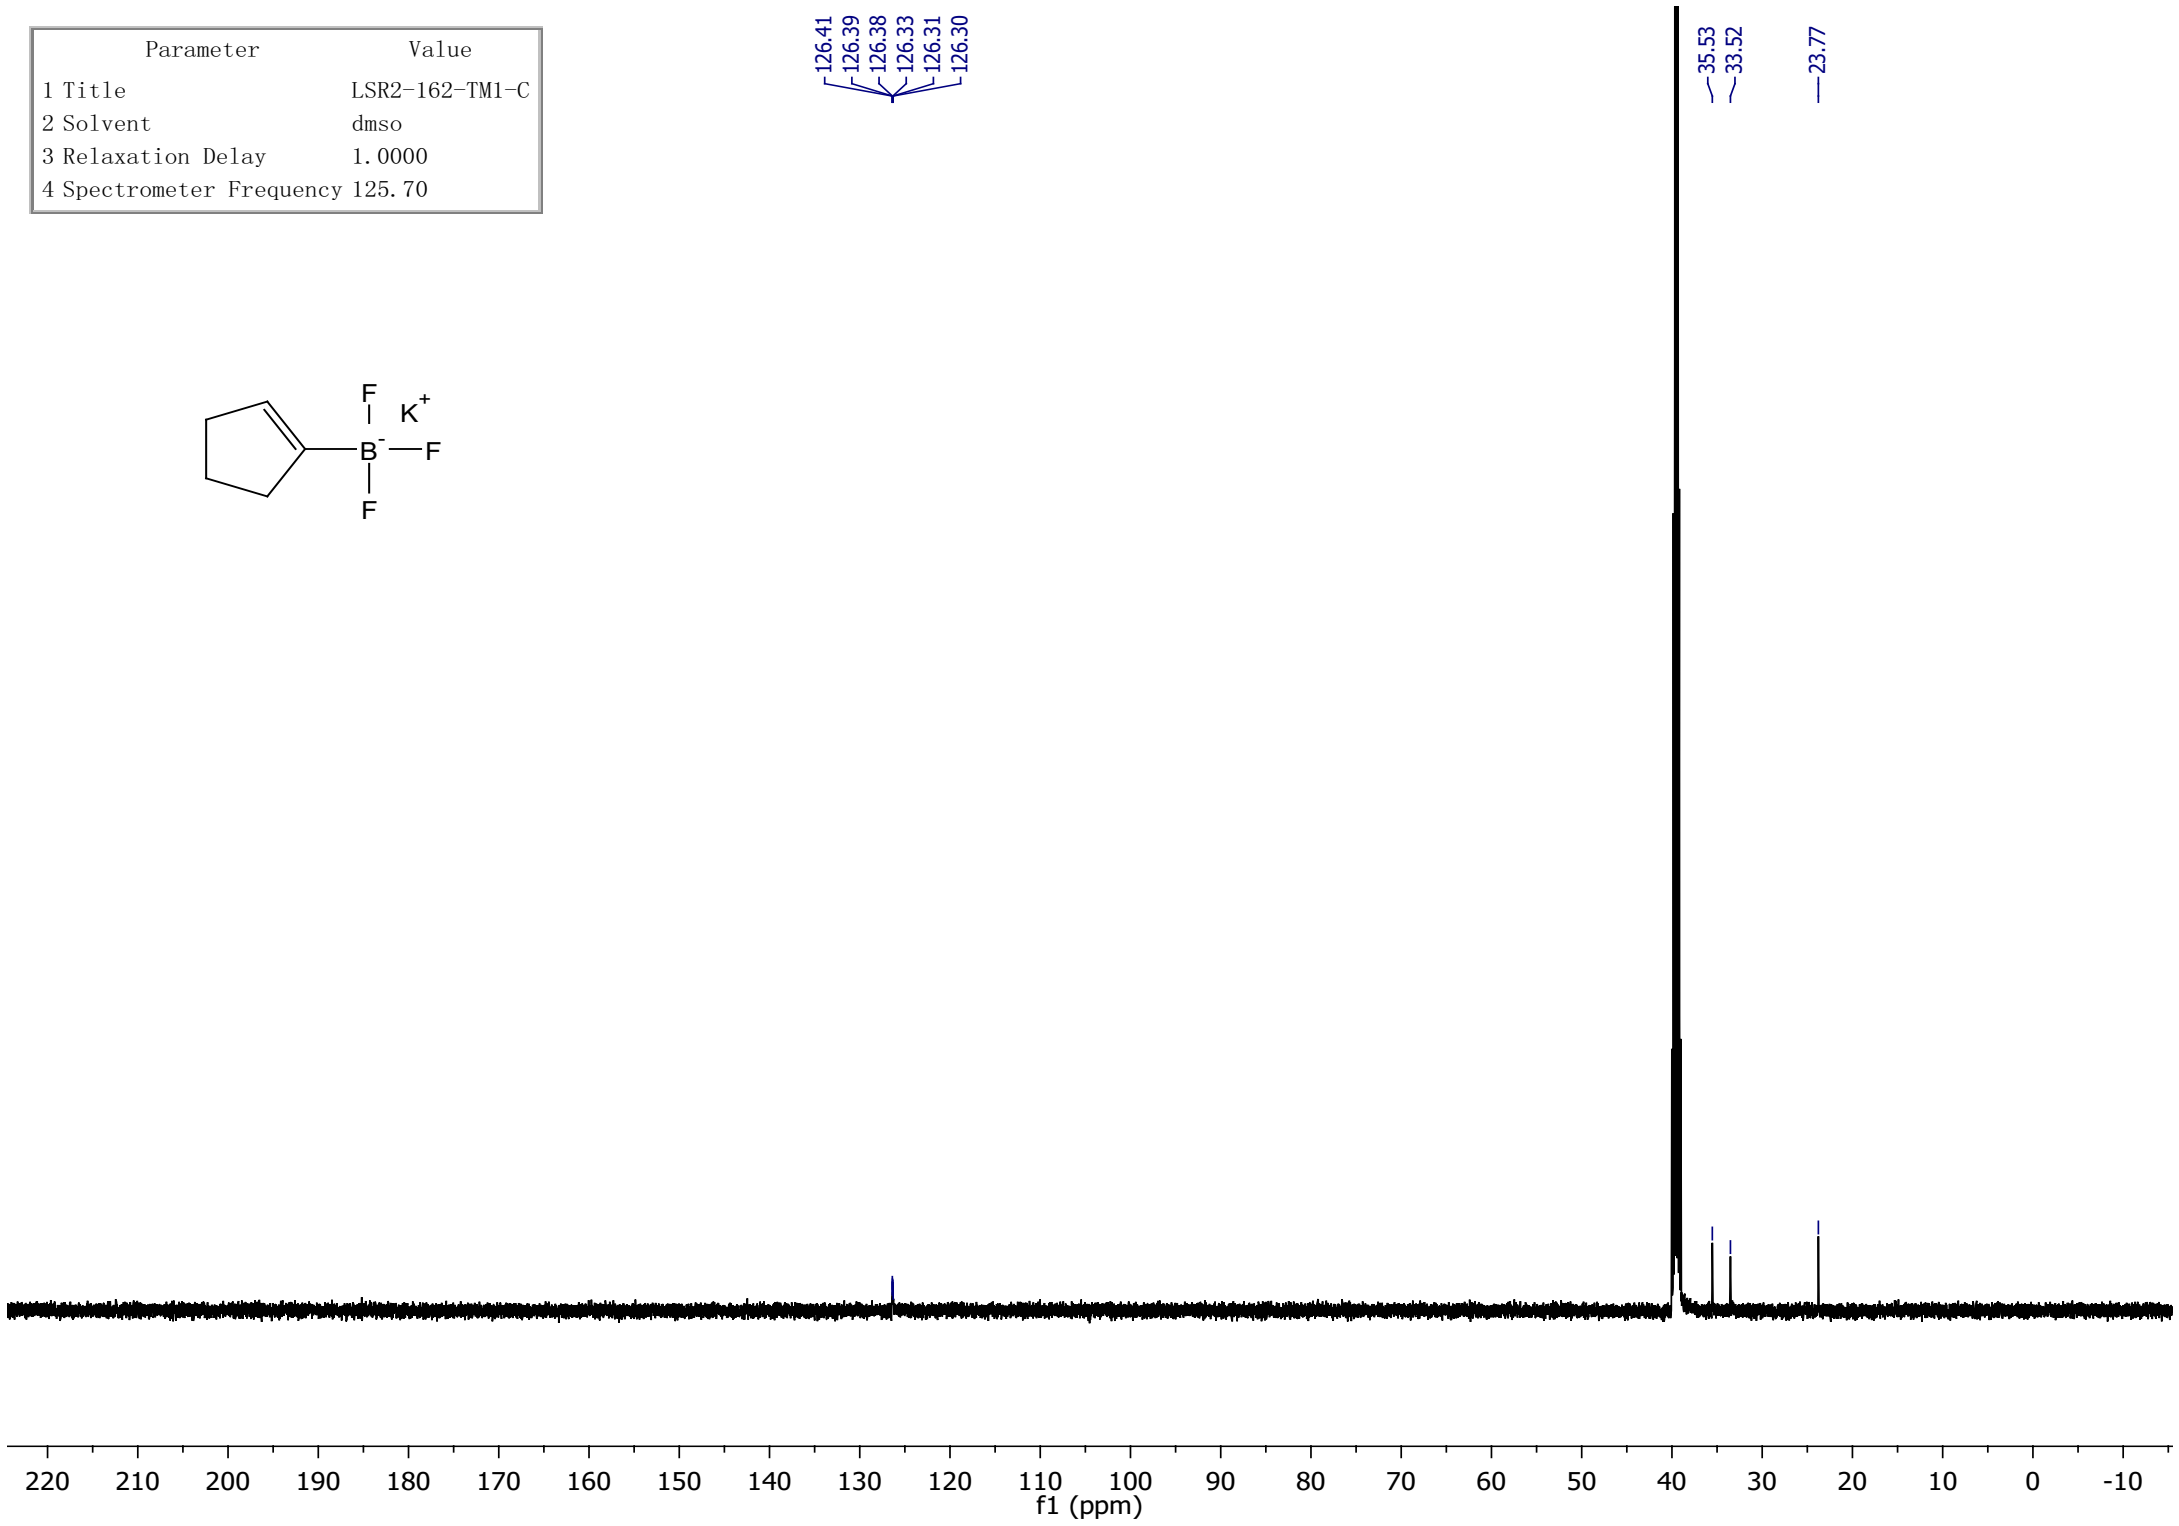



| Parameter                | Value        |
|--------------------------|--------------|
| 1 Title                  | LSR2-162-F19 |
| 2 Solvent                | acetone      |
| 3 Relaxation Delay       | 4.8000       |
| 4 Spectrometer Frequency | 376.11       |

-140.08  
-140.21  
-140.36  
-140.50

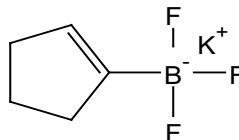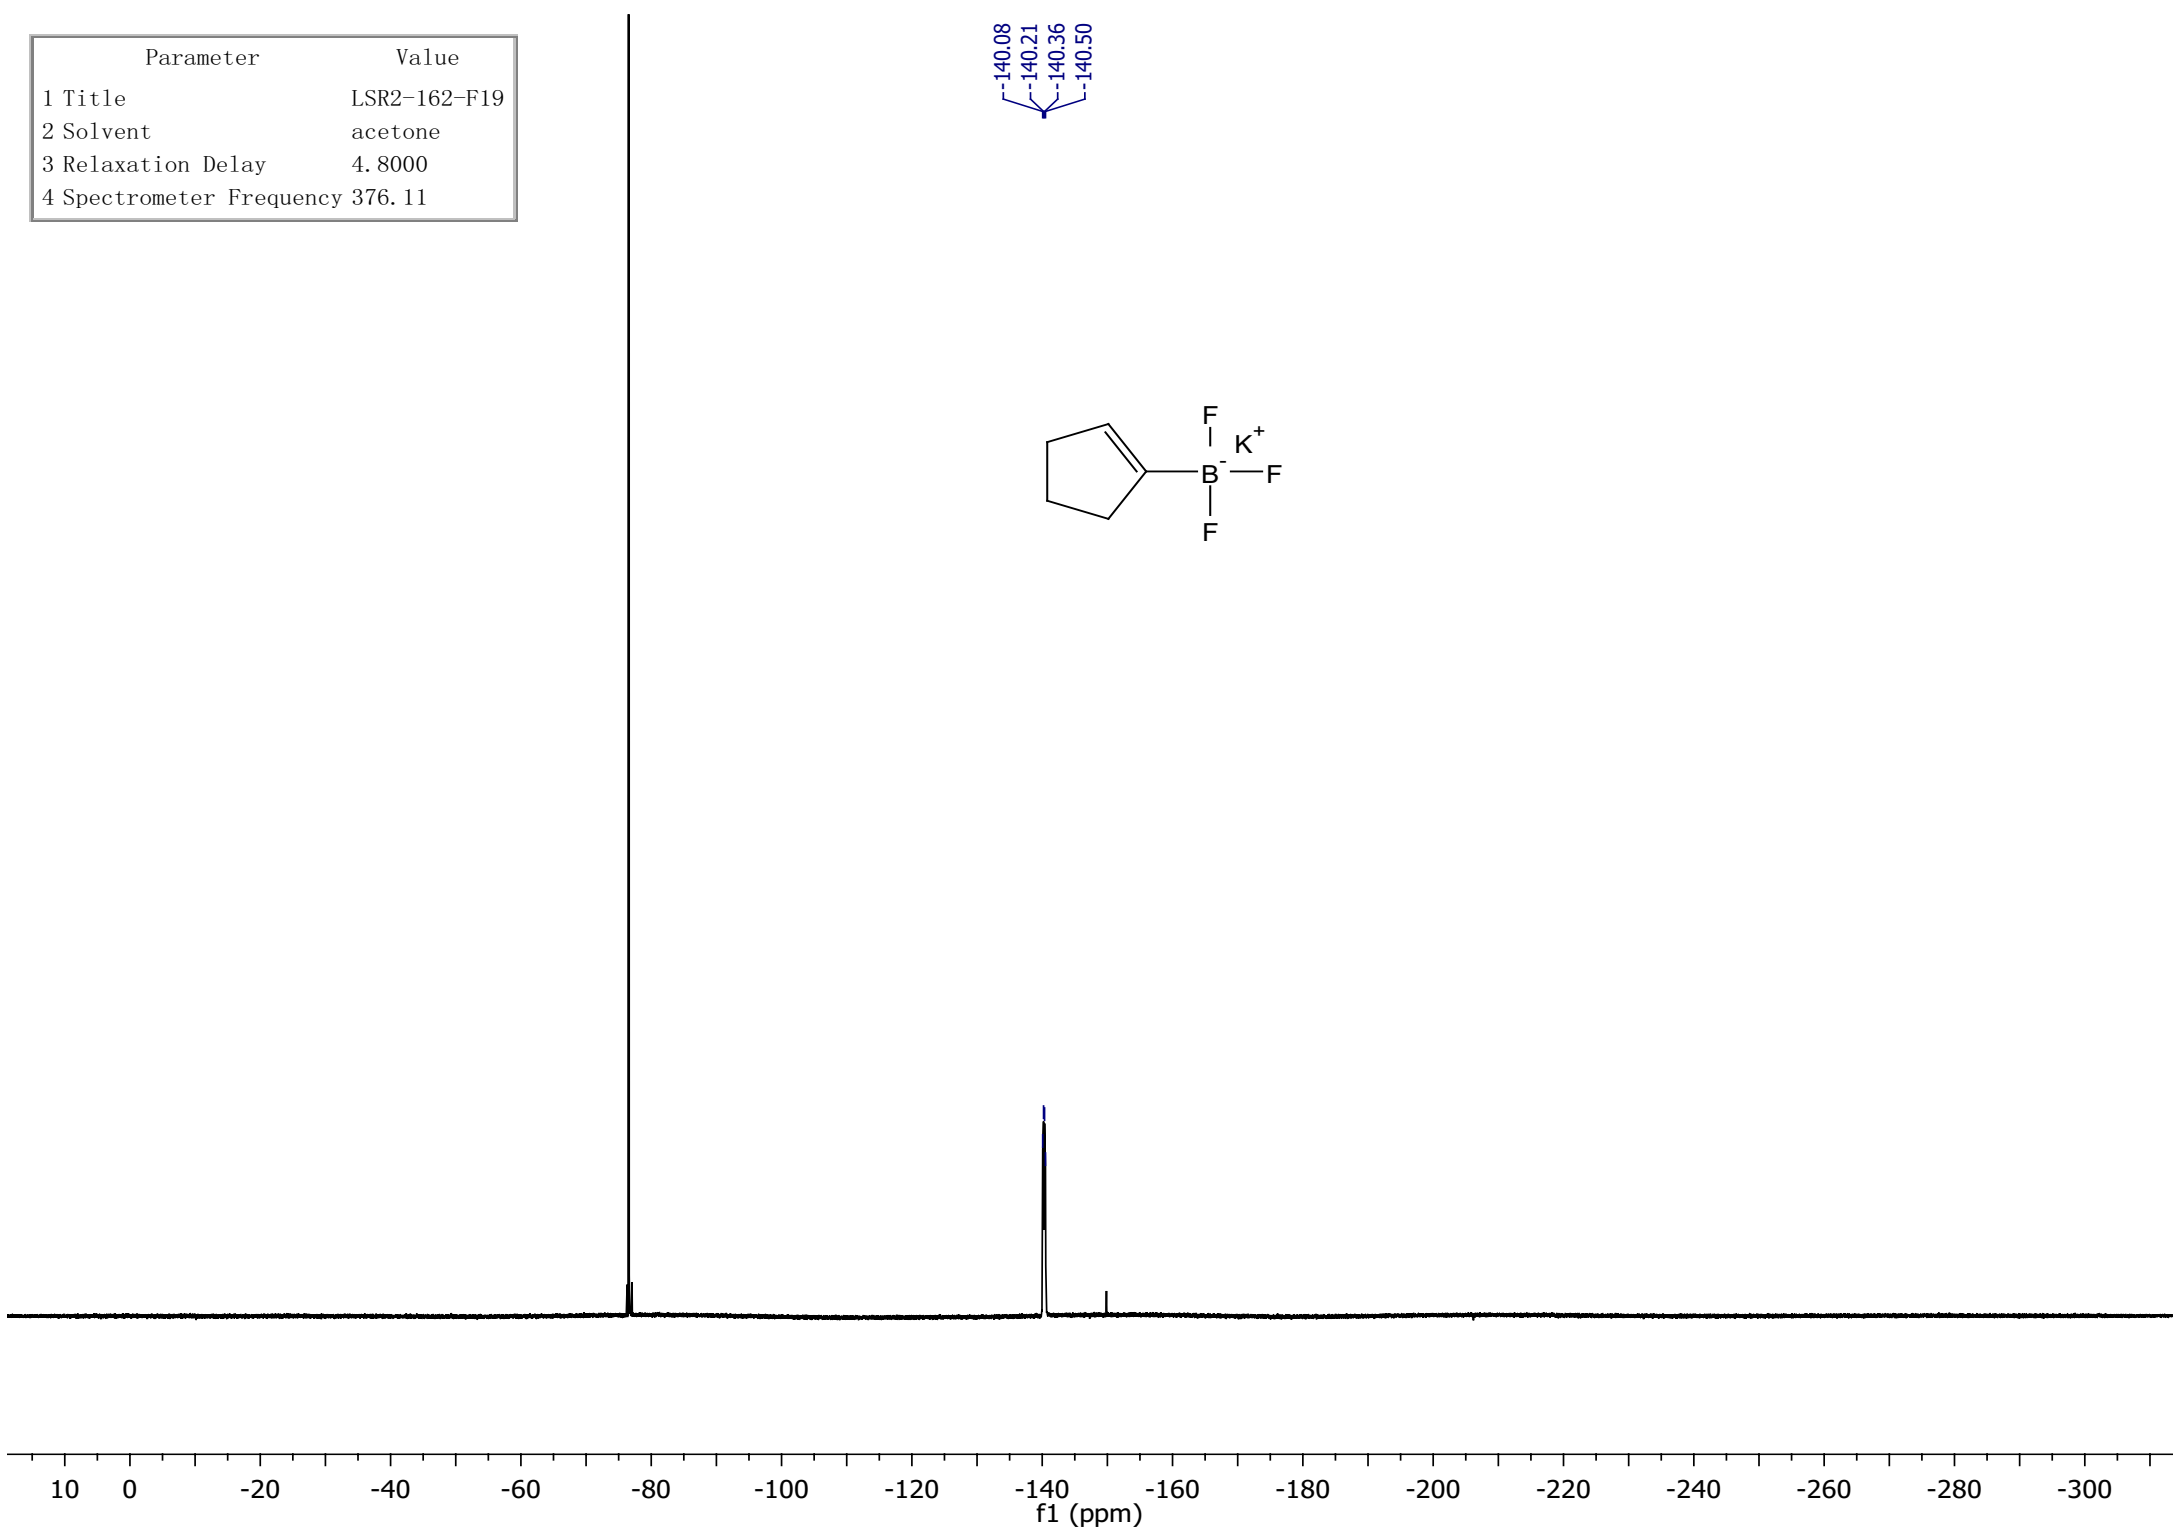

| Parameter                | Value       |
|--------------------------|-------------|
| 1 Title                  | LSR2-121-ST |
| 2 Solvent                | acetone     |
| 3 Relaxation Delay       | 4.8000      |
| 4 Spectrometer Frequency | 399.78      |

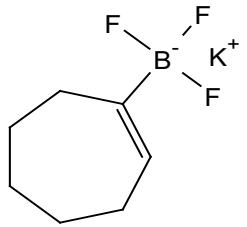

5.89  
5.87  
5.86

2.12  
2.11  
2.10  
2.04  
2.04  
2.03  
2.02  
2.00

1.66  
1.42  
1.41  
1.40  
1.40  
1.39  
1.38  
1.38  
1.37  
1.36

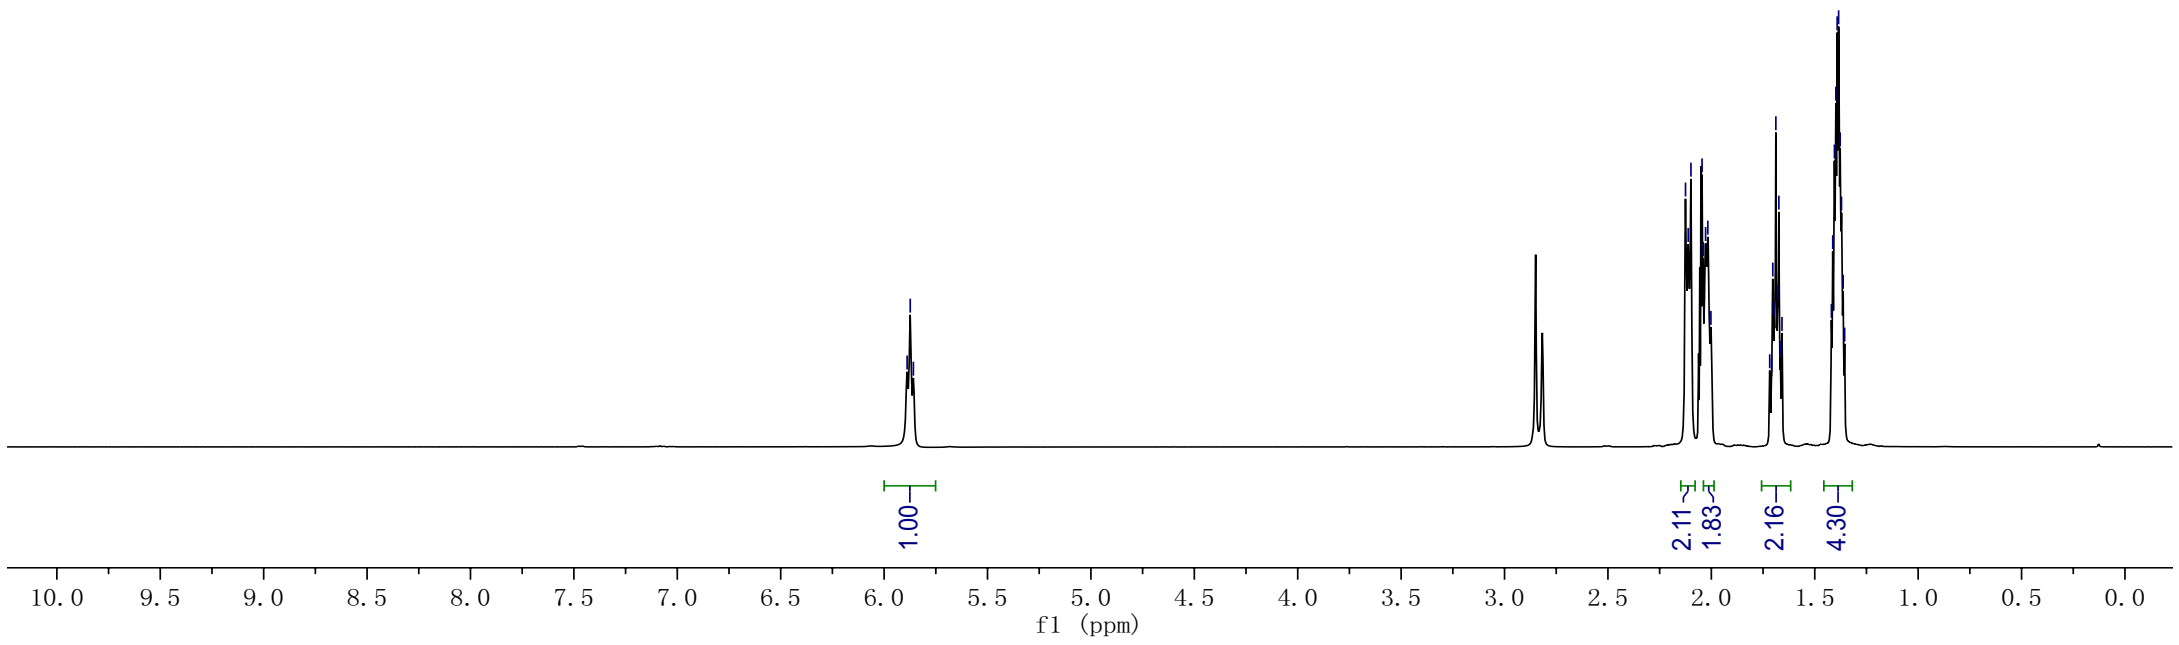

| Parameter                | Value         |
|--------------------------|---------------|
| 1 Title                  | LSR2-121-ST-C |
| 2 Solvent                | acetone       |
| 3 Relaxation Delay       | 1.0000        |
| 4 Spectrometer Frequency | 100.54        |

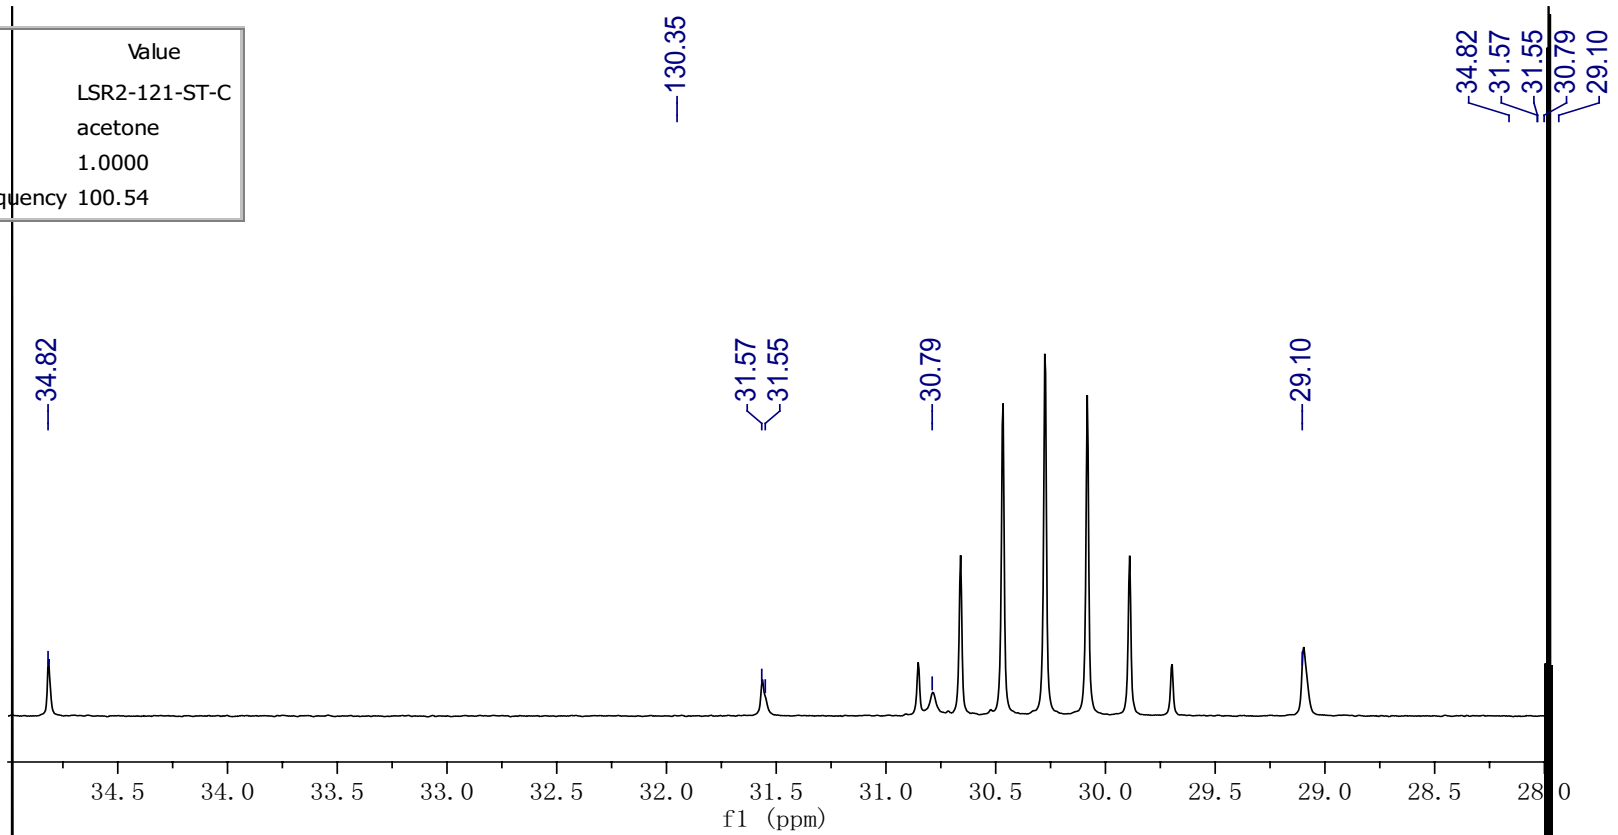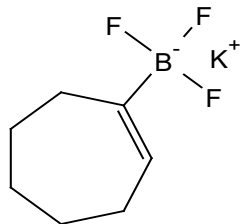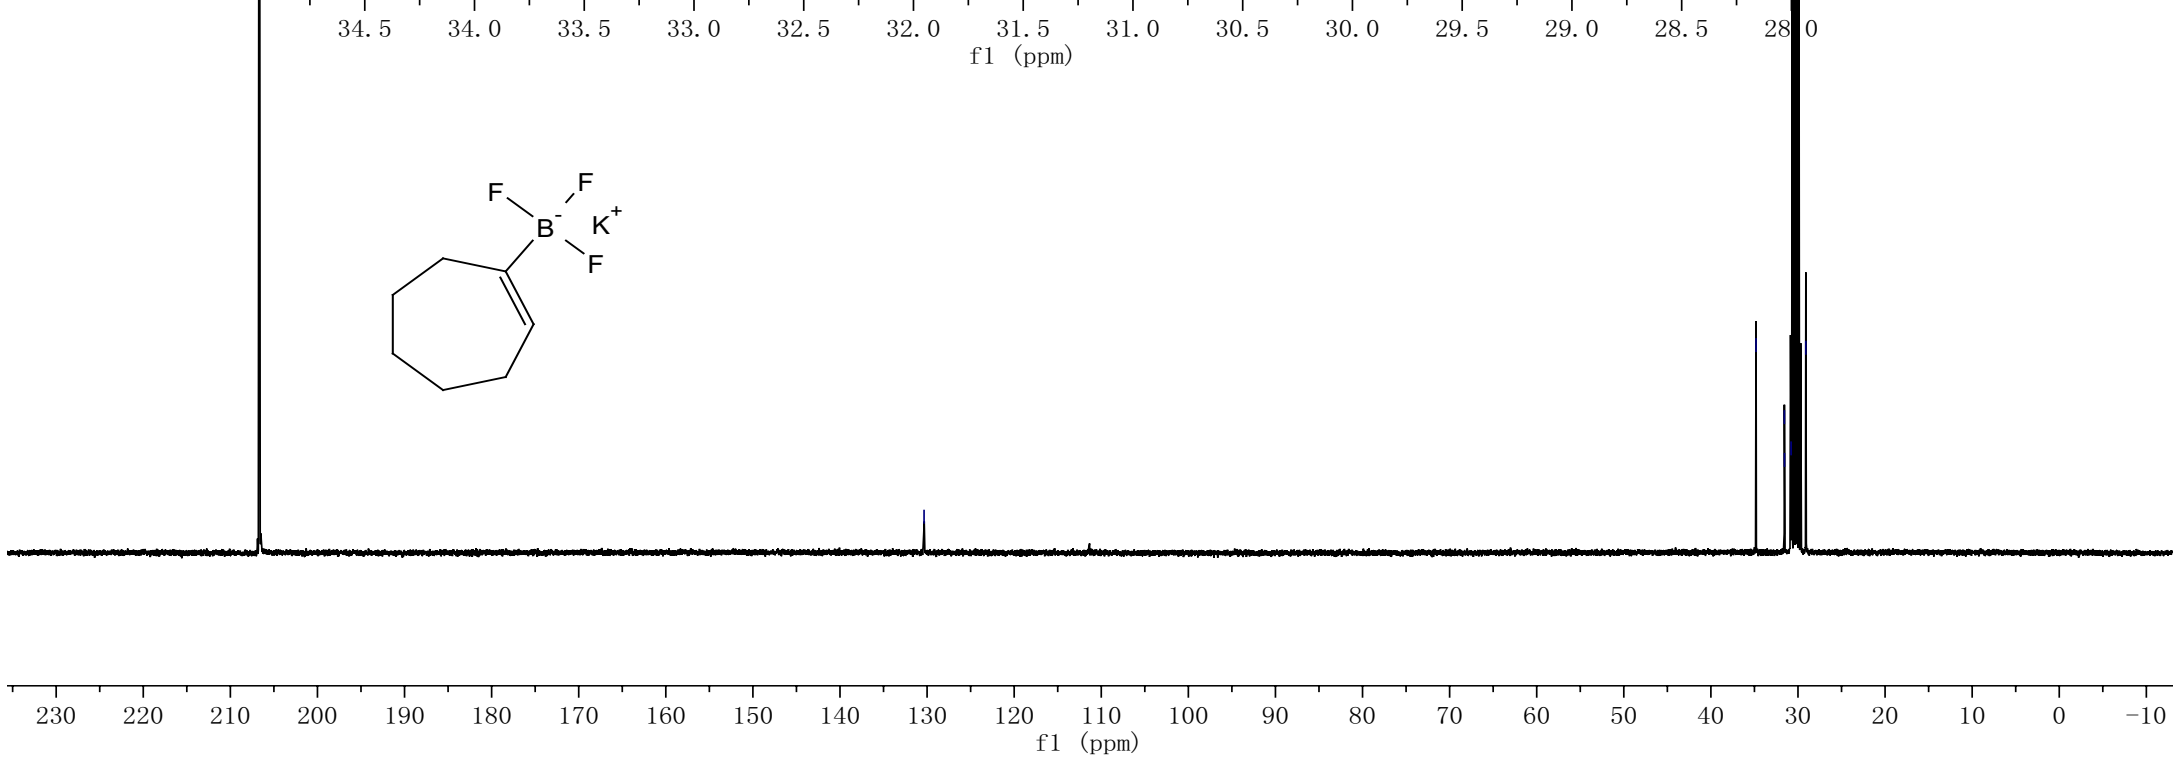

| Parameter                | Value        |
|--------------------------|--------------|
| 1 Title                  | LSR2-121-F19 |
| 2 Solvent                | dms0         |
| 3 Relaxation Delay       | 4.8000       |
| 4 Spectrometer Frequency | 376.11       |

141.17

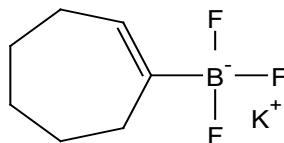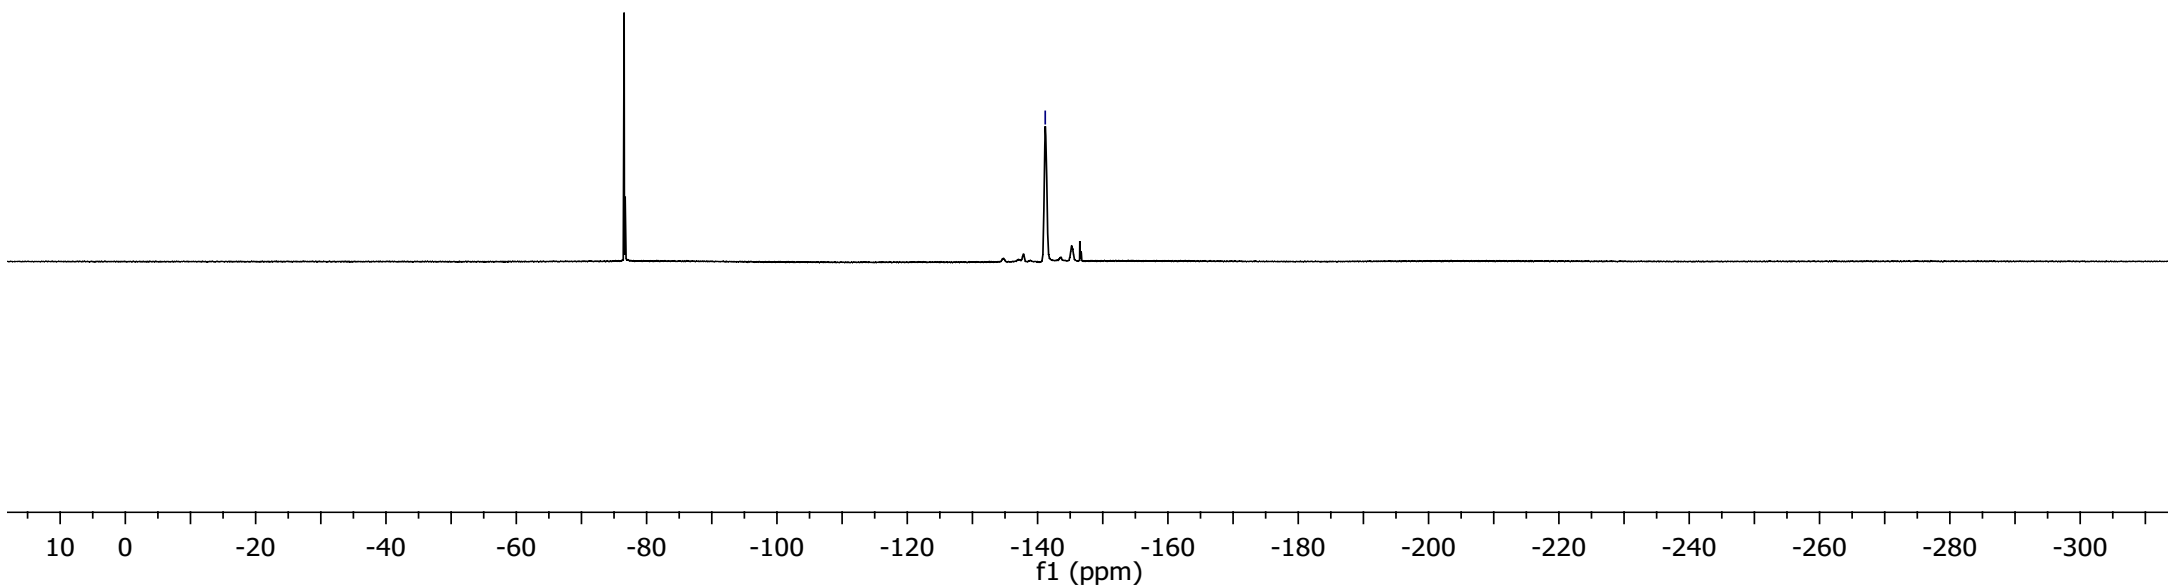

| Parameter                | Value        |
|--------------------------|--------------|
| 1 Title                  | LSR1-285-2-2 |
| 2 Solvent                | acetone      |
| 3 Relaxation Delay       | 4.8000       |
| 4 Spectrometer Frequency | 499.86       |

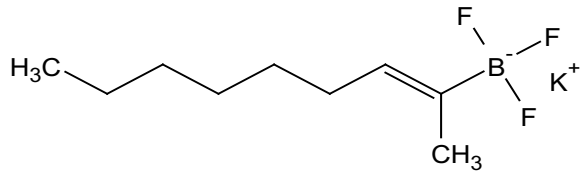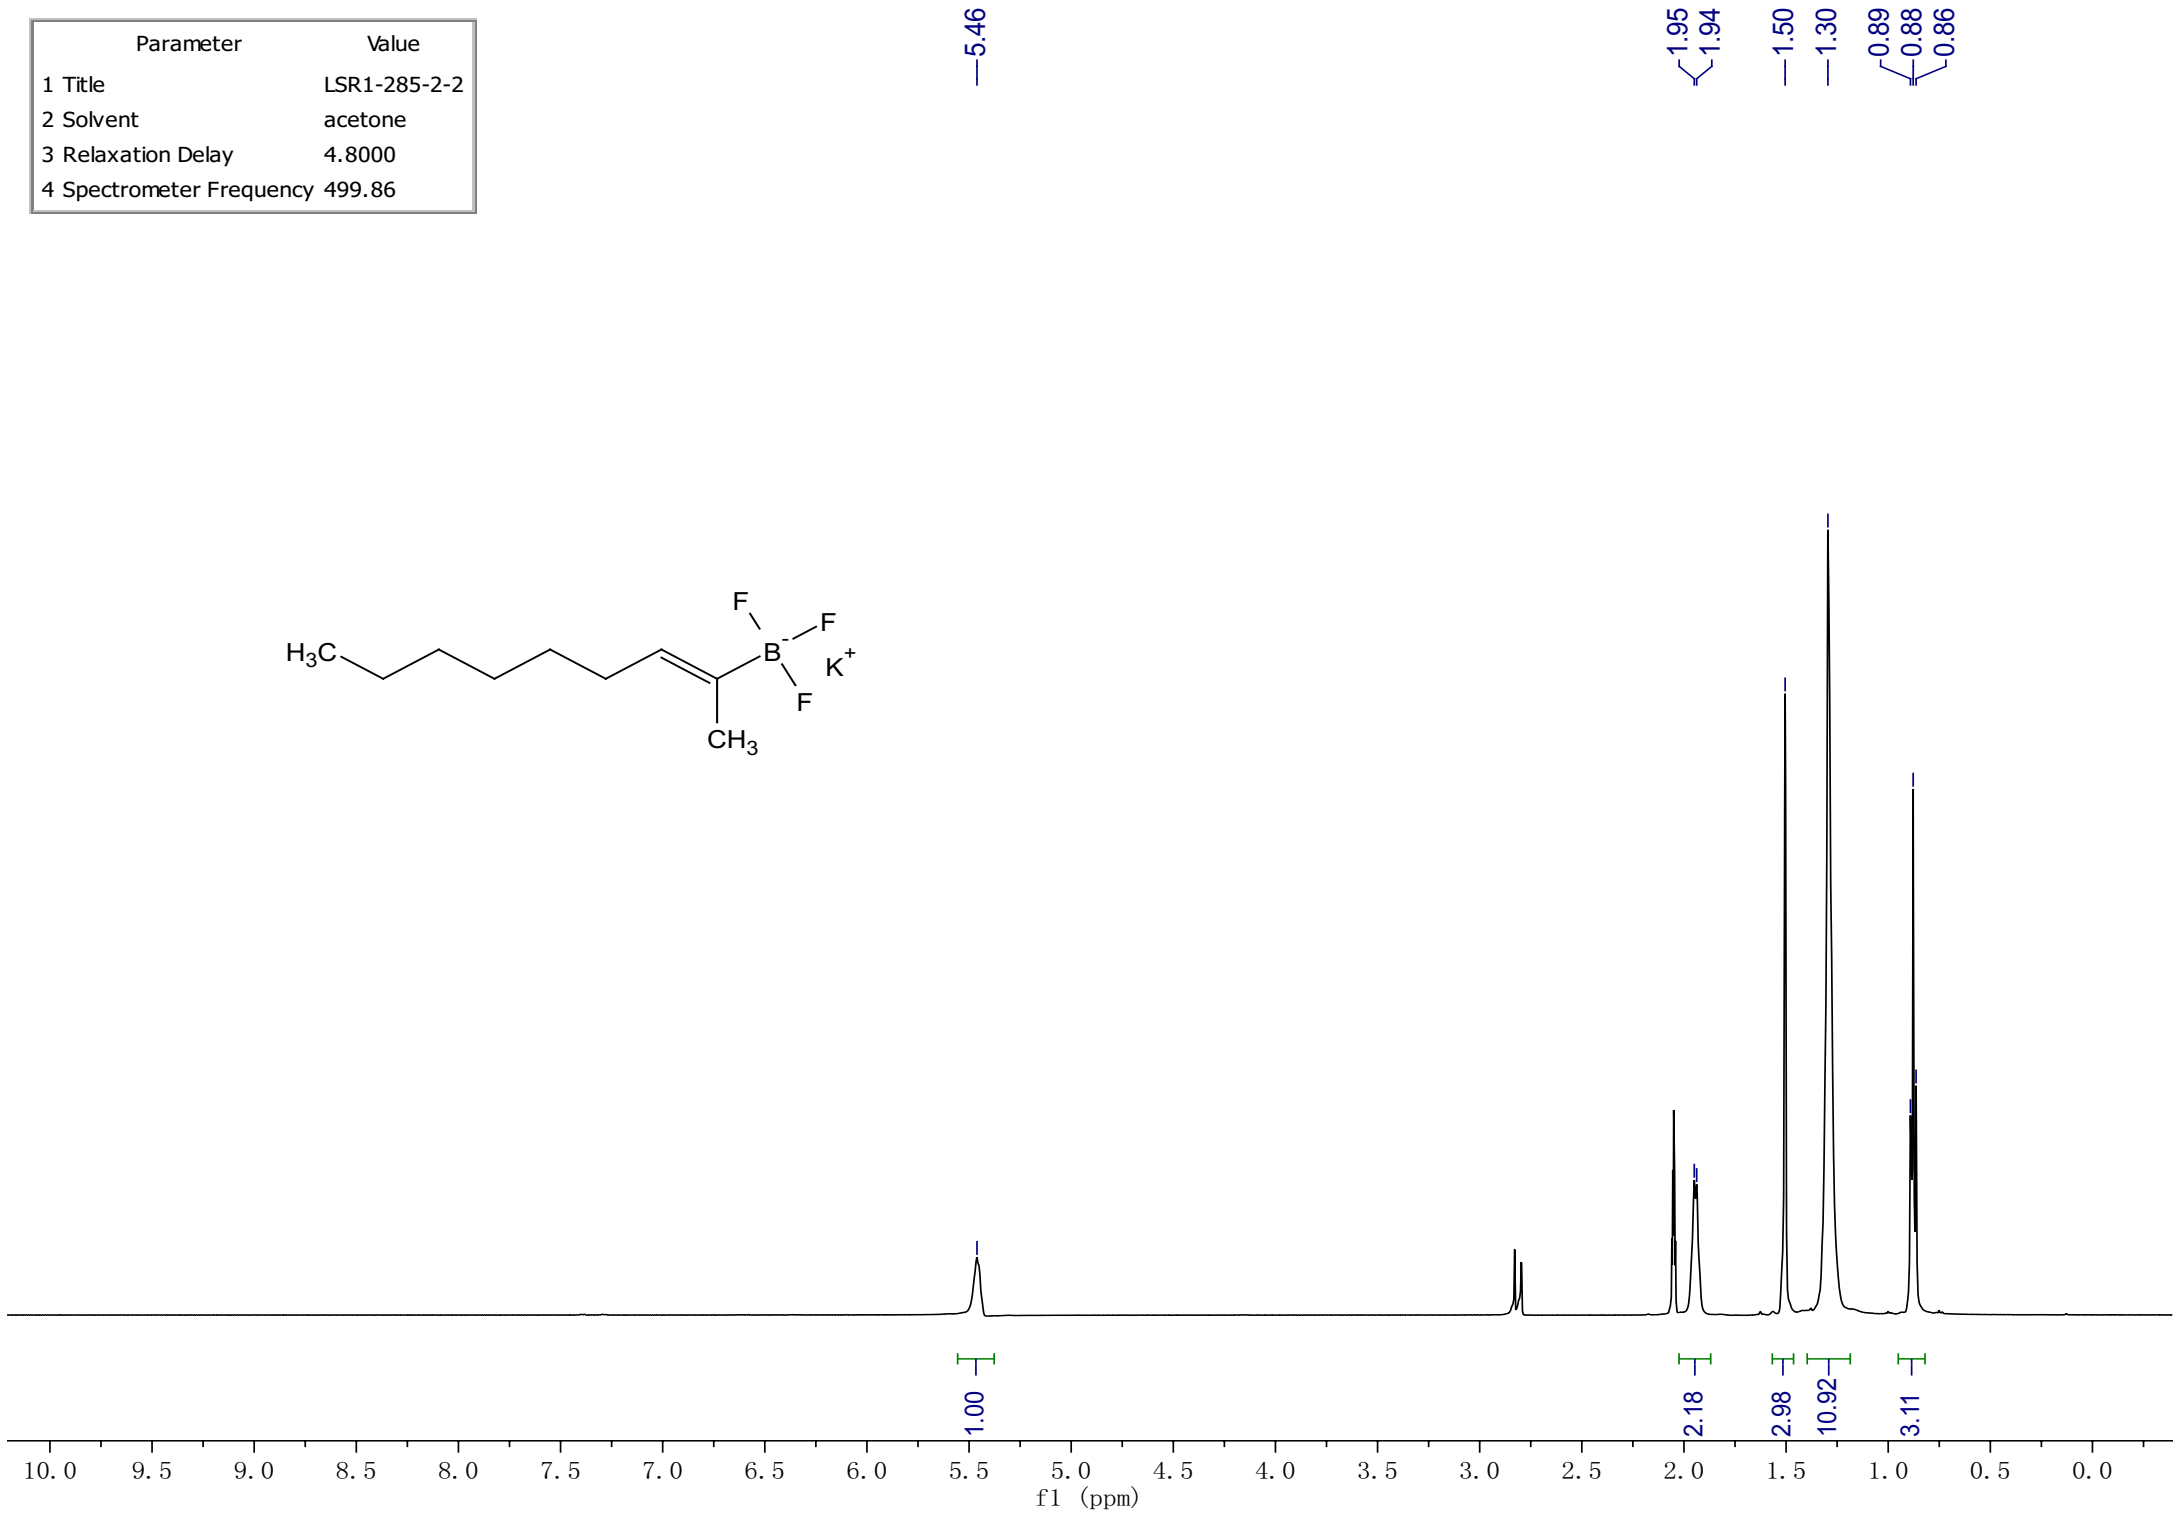

| Parameter                | Value         |
|--------------------------|---------------|
| 1 Title                  | LSR1-285-2-3C |
| 2 Solvent                | acetone       |
| 3 Relaxation Delay       | 1.0000        |
| 4 Spectrometer Frequency | 100.54        |

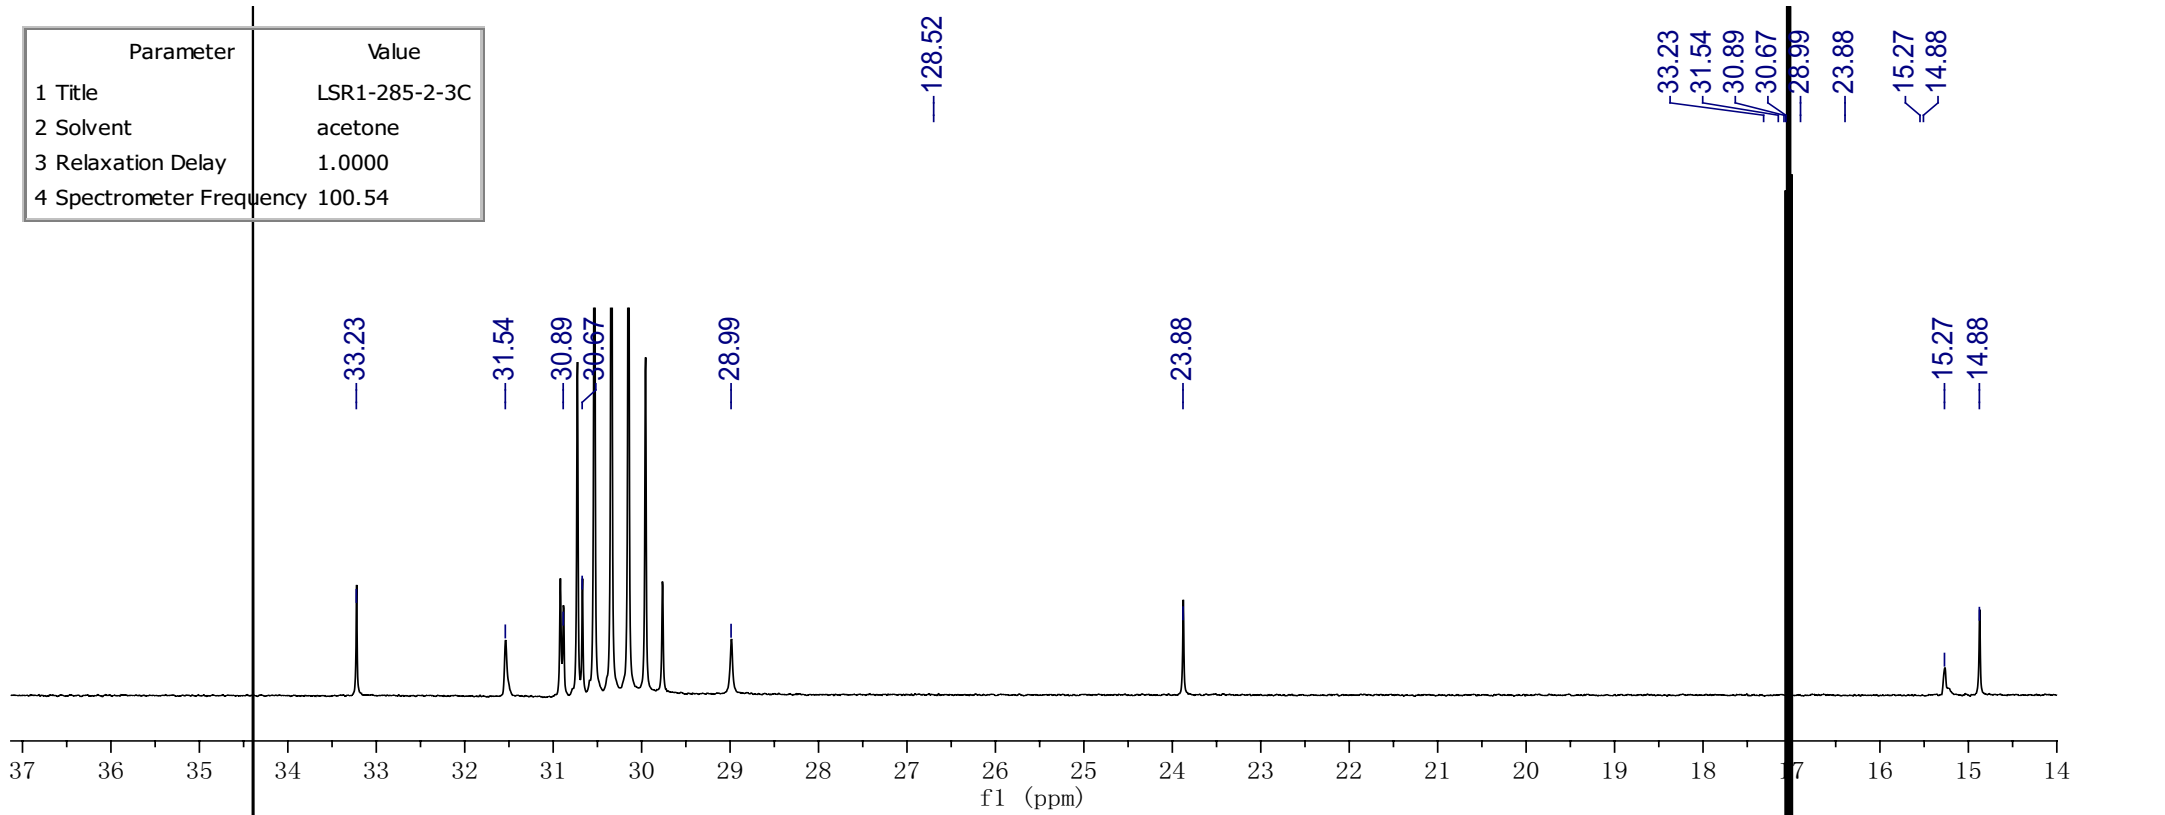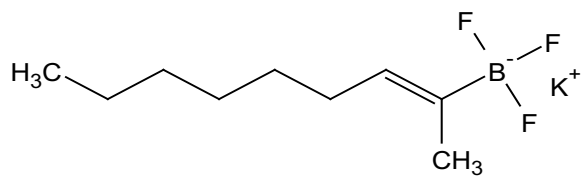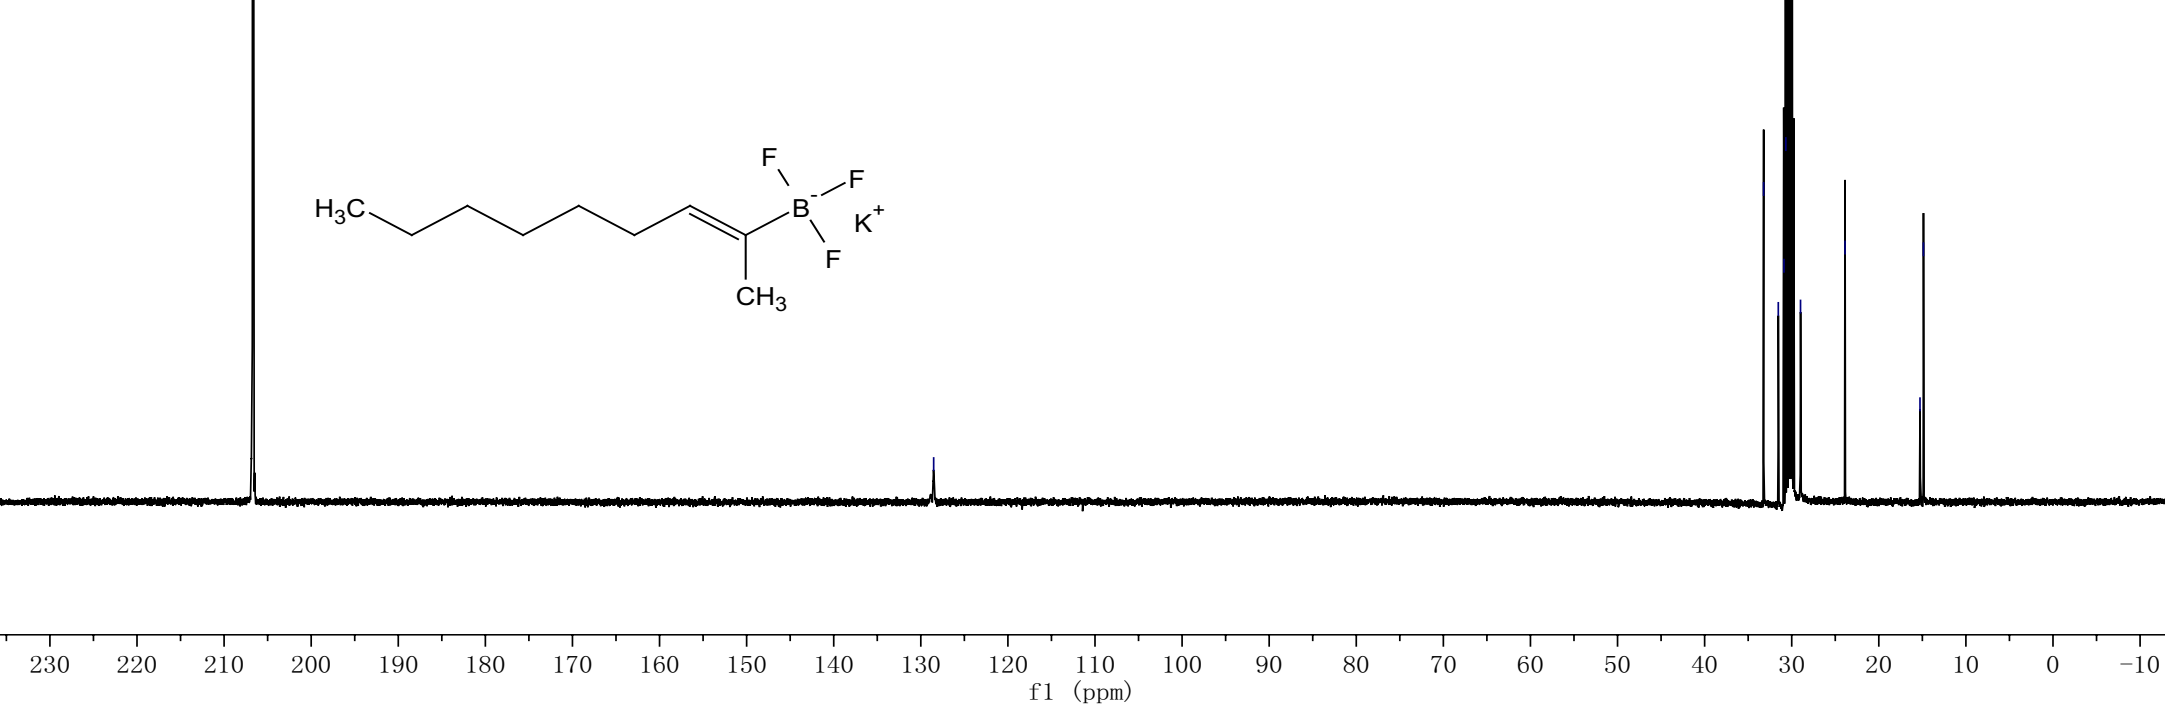

| Parameter                | Value          |
|--------------------------|----------------|
| 1 Title                  | LSR1-285-2-F19 |
| 2 Solvent                | acetone        |
| 3 Relaxation Delay       | 4.8000         |
| 4 Spectrometer Frequency | 376.11         |

-143.80  
-143.95

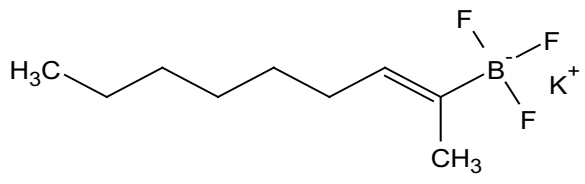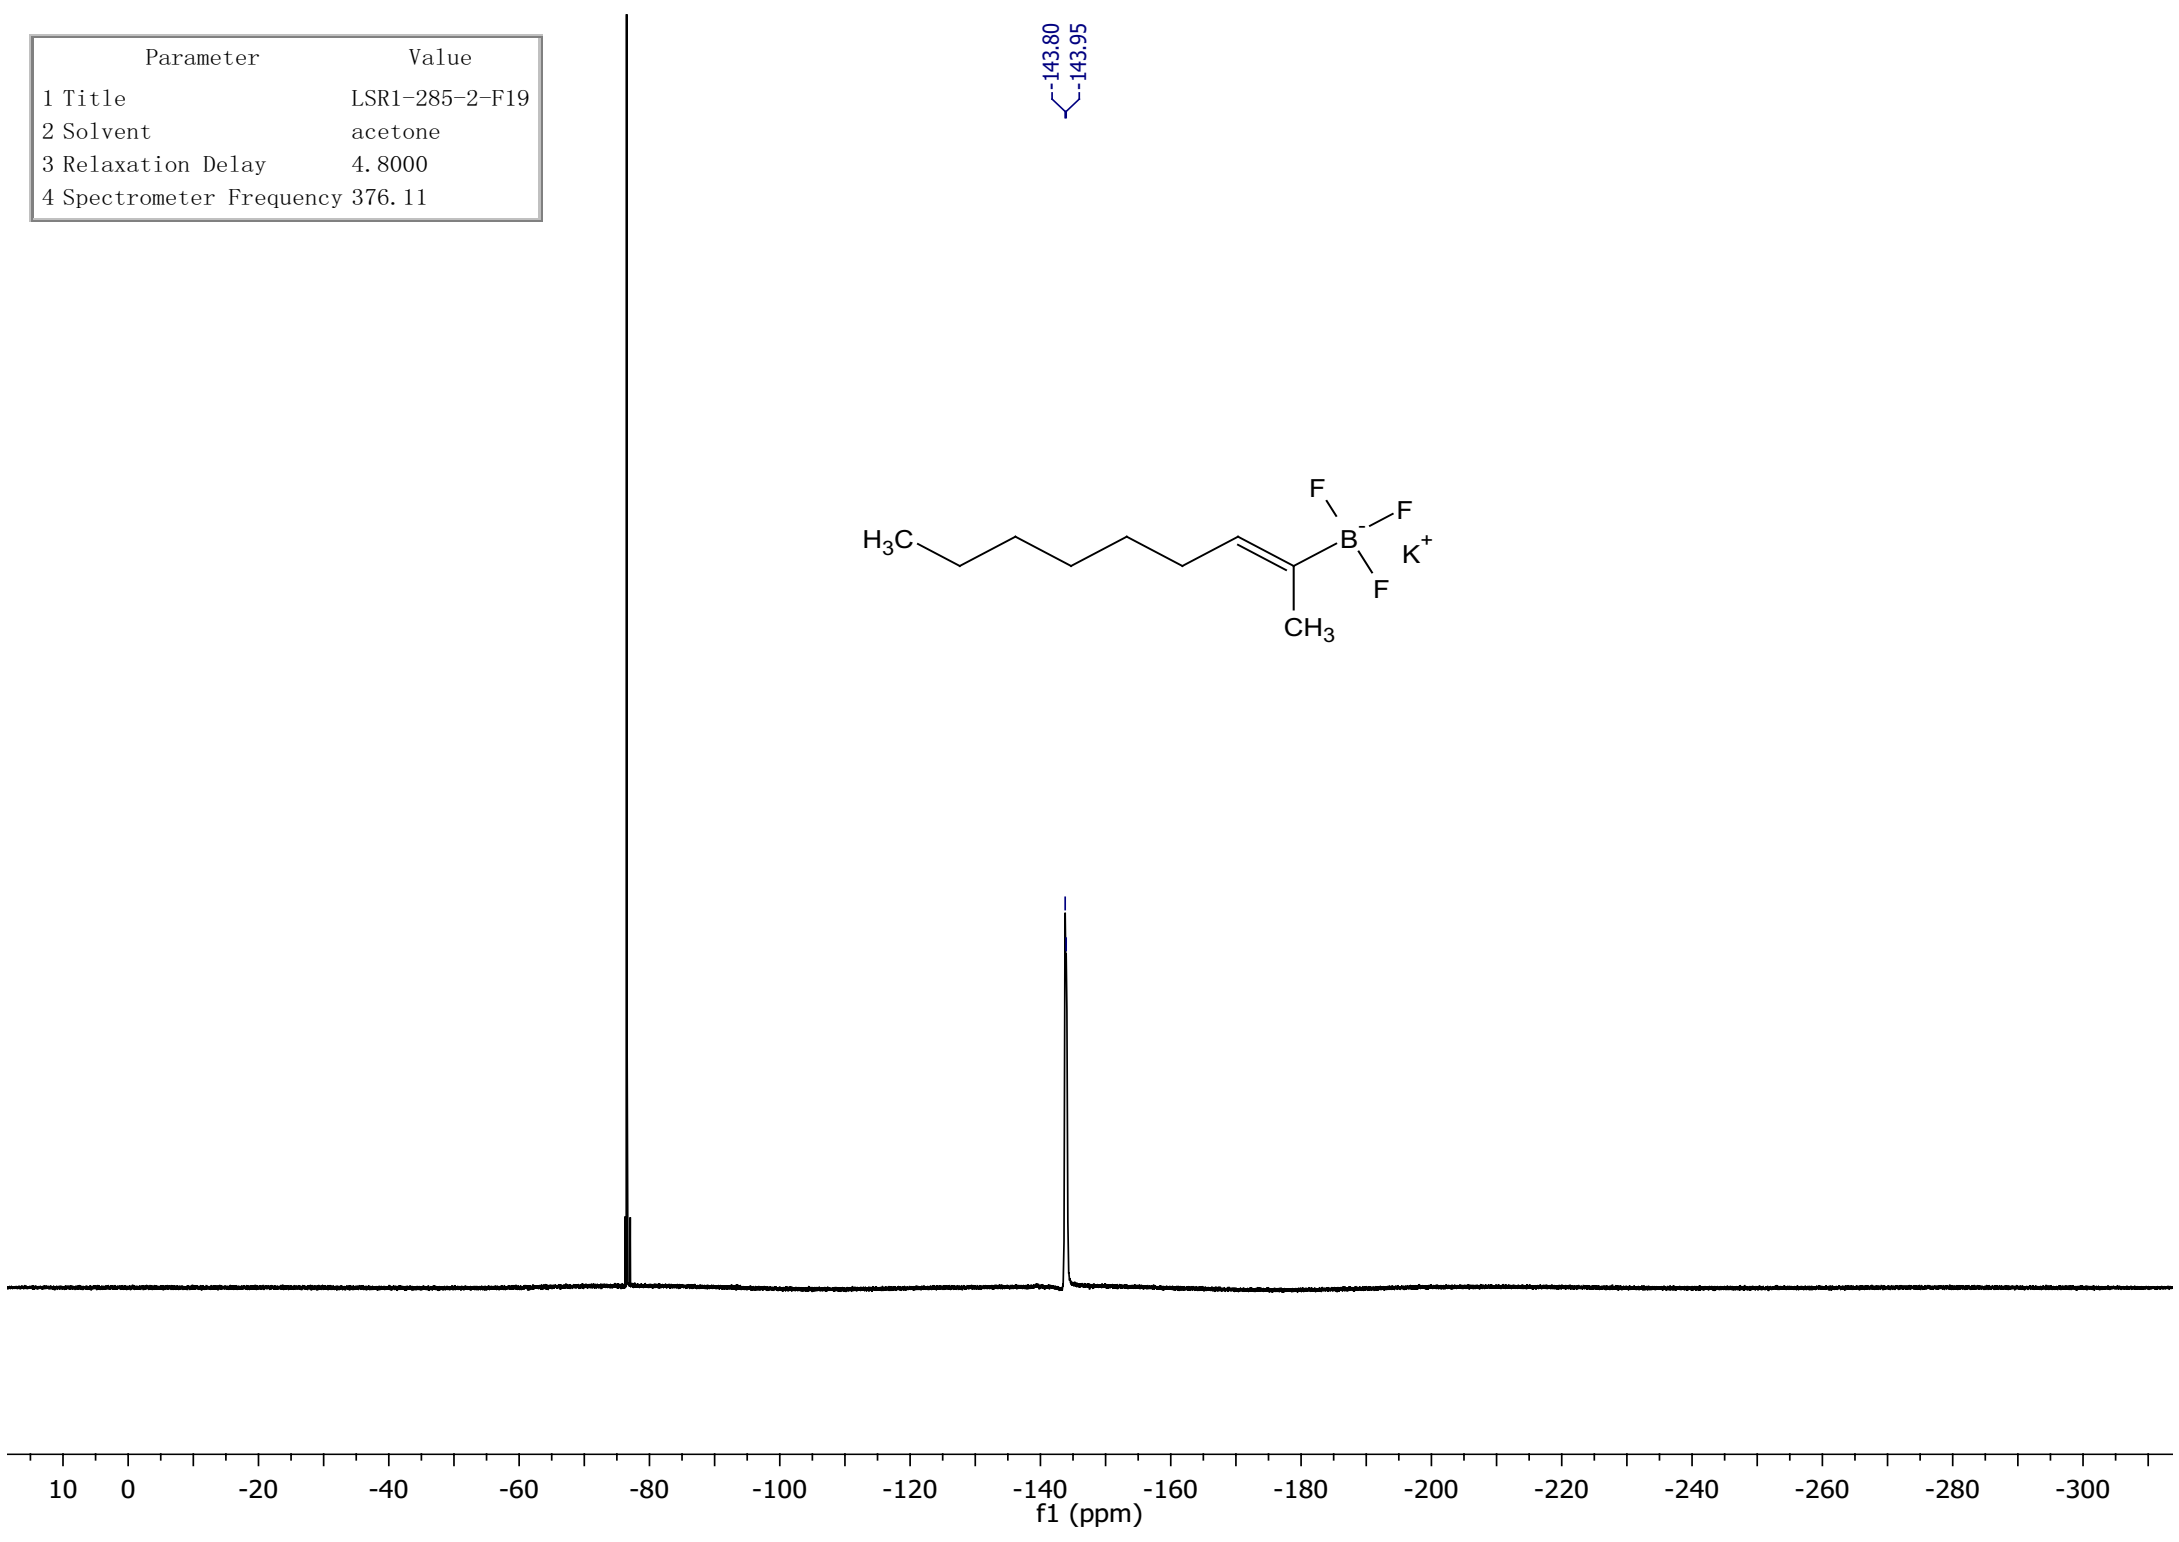

| Parameter                | Value       |
|--------------------------|-------------|
| 1 Title                  | LSR2-122-ST |
| 2 Solvent                | acetone     |
| 3 Relaxation Delay       | 4.8000      |
| 4 Spectrometer Frequency | 399.78      |

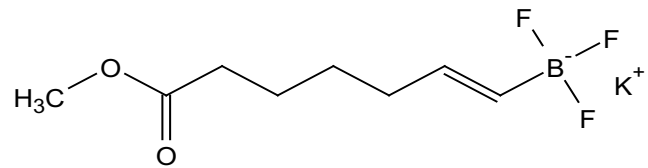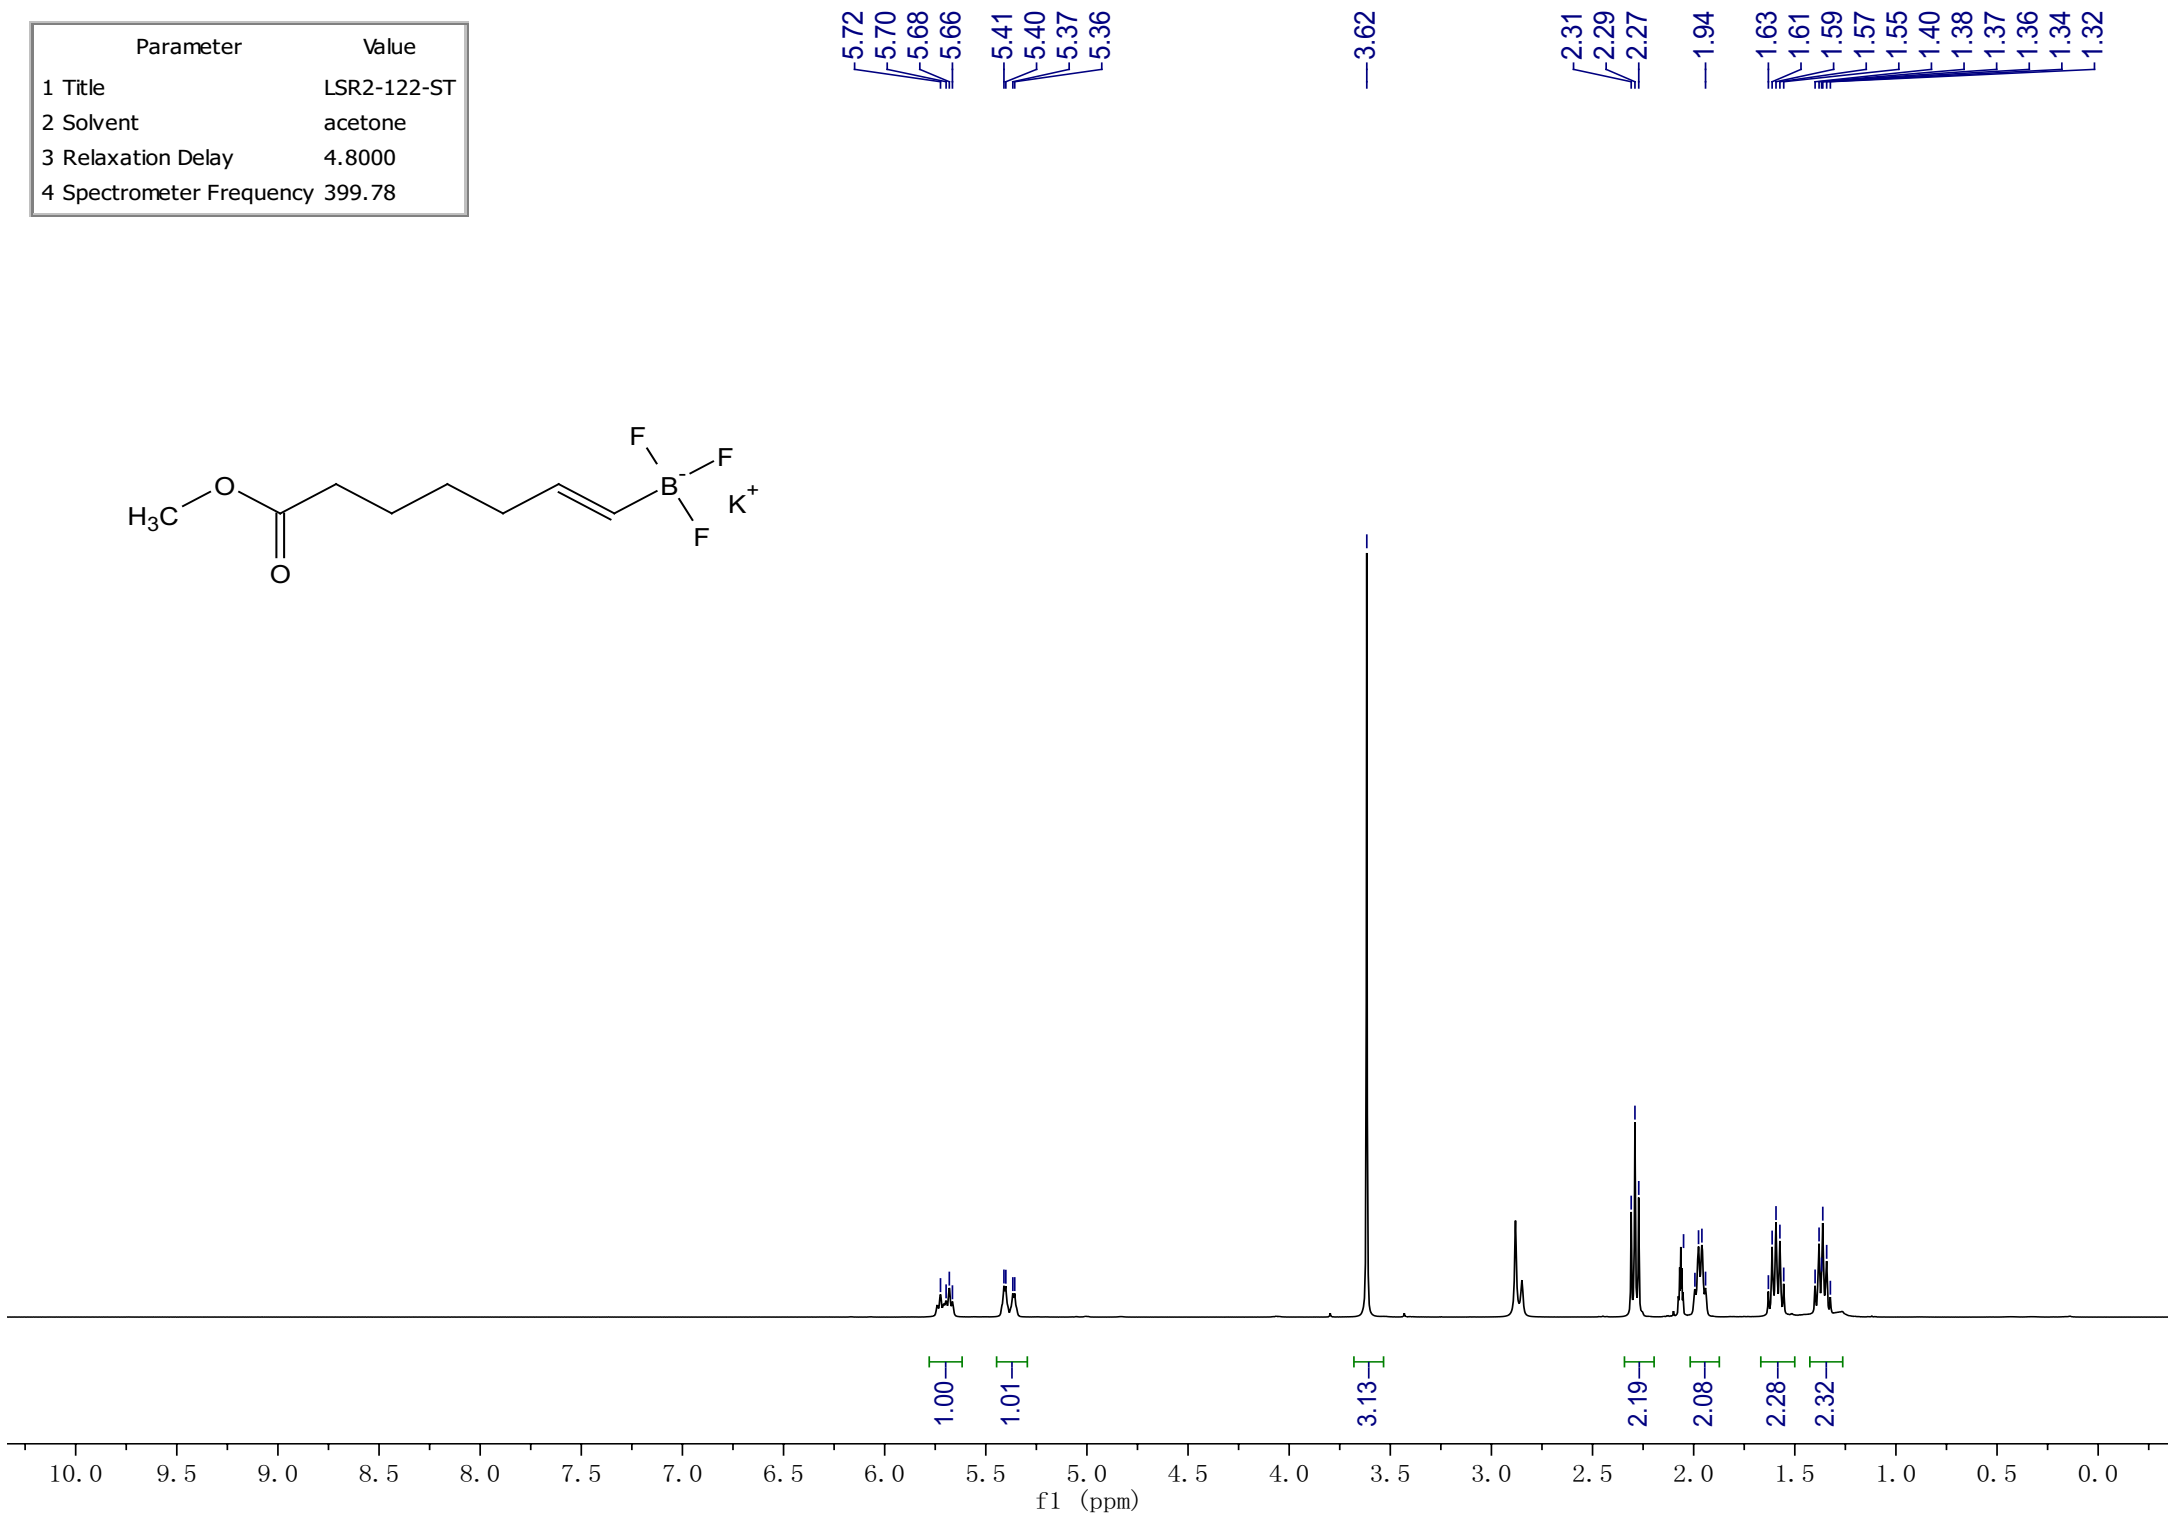



| Parameter                | Value         |
|--------------------------|---------------|
| 1 Title                  | LSR2-122-ST-C |
| 2 Solvent                | acetone       |
| 3 Relaxation Delay       | 1.0000        |
| 4 Spectrometer Frequency | 100.54        |

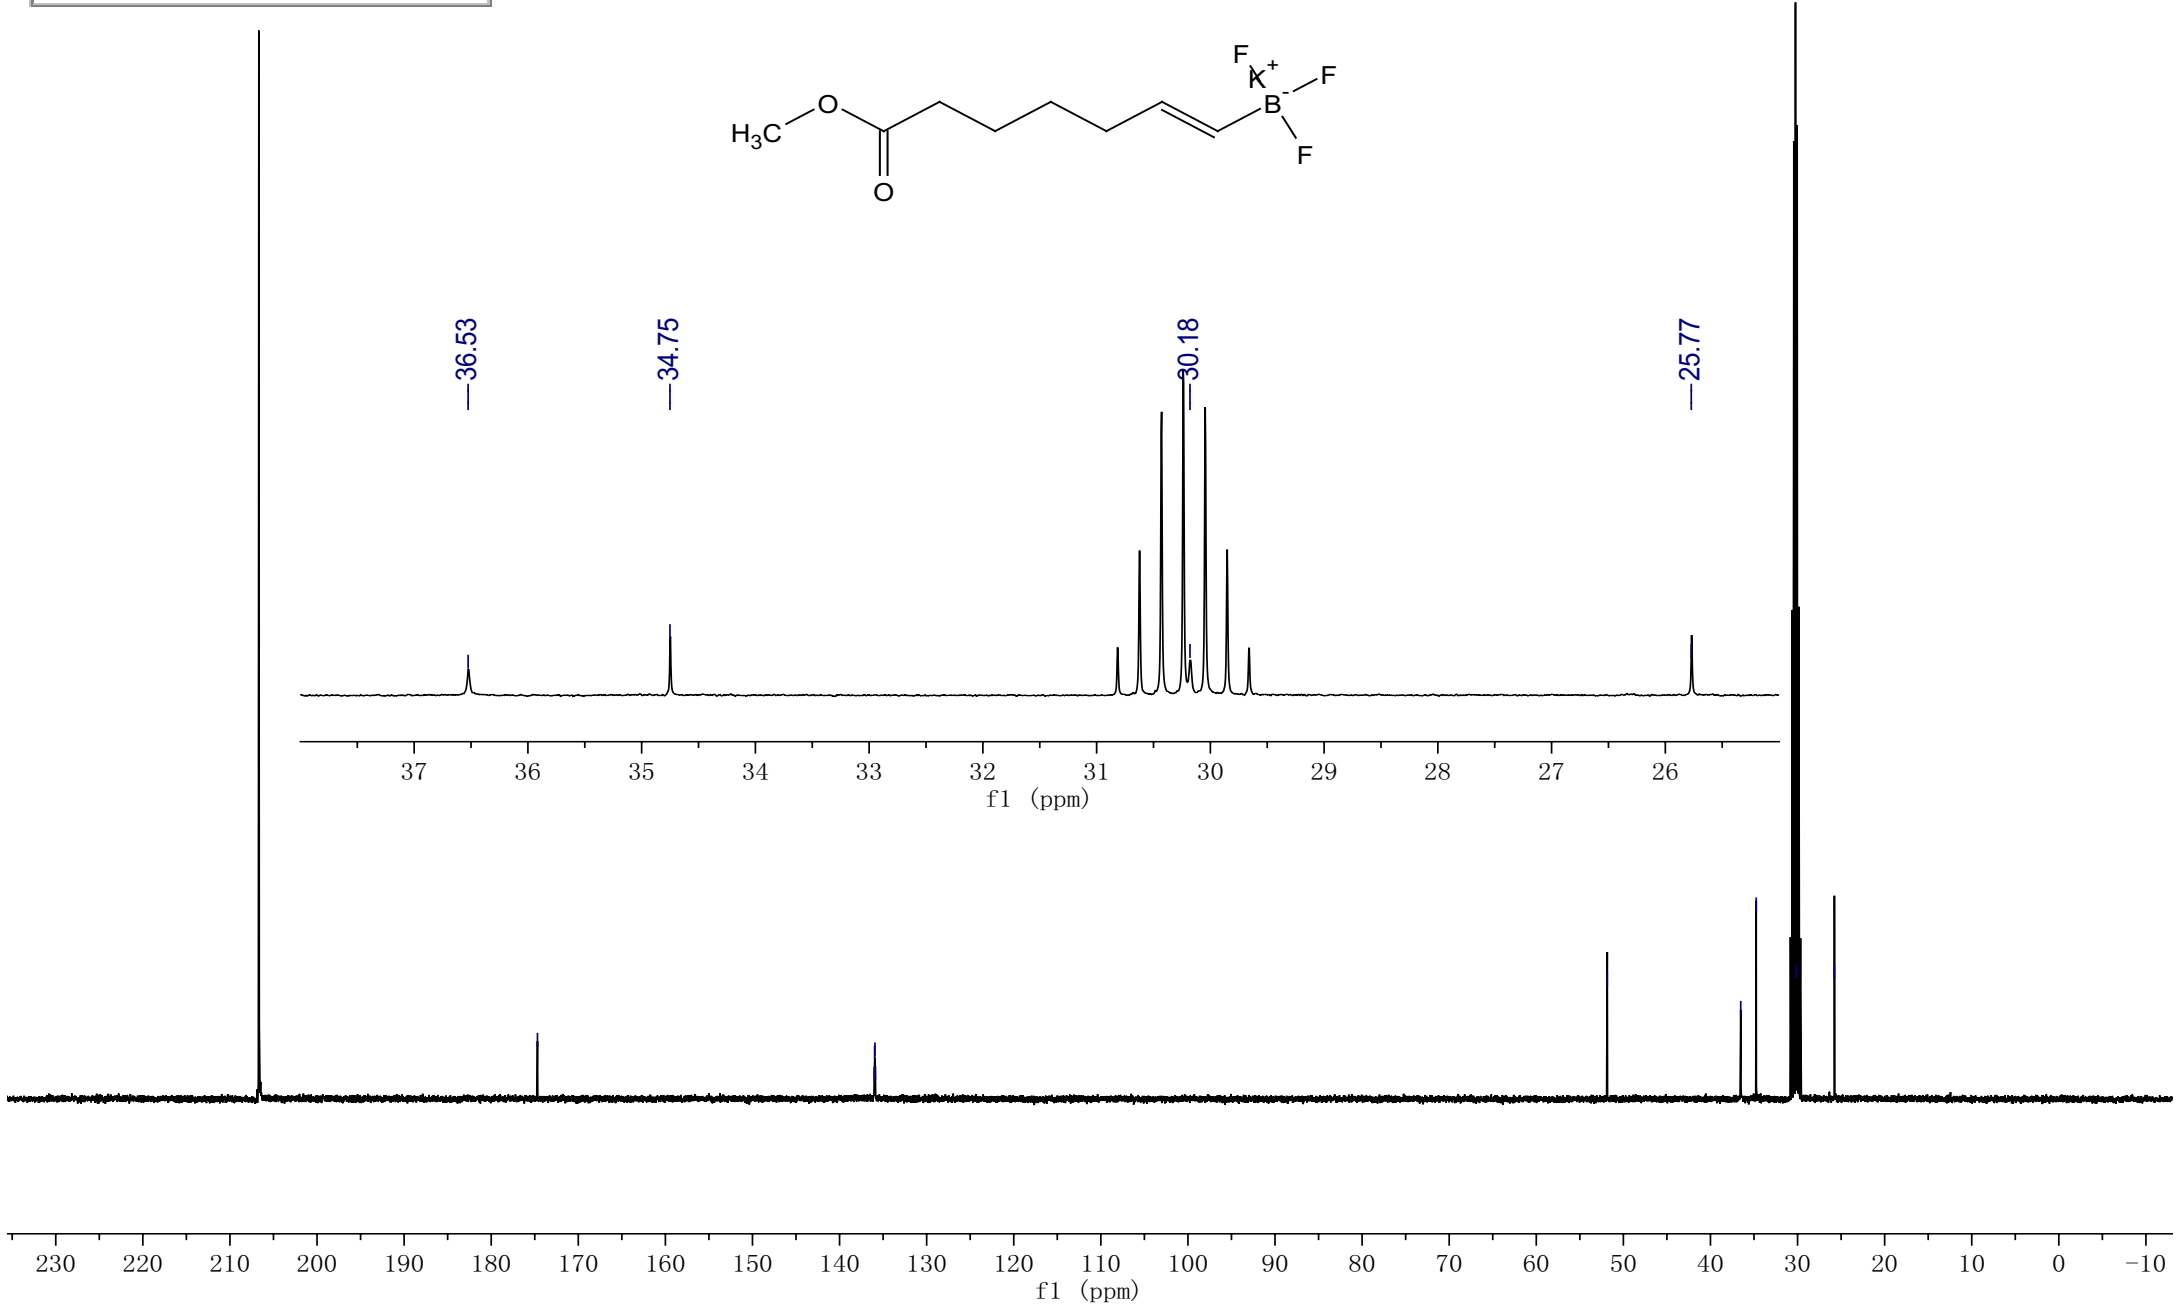

| Parameter                | Value          |
|--------------------------|----------------|
| 1 Title                  | LSR2-122-F19-2 |
| 2 Solvent                | acetone        |
| 3 Relaxation Delay       | 4.8000         |
| 4 Spectrometer Frequency | 376.11         |

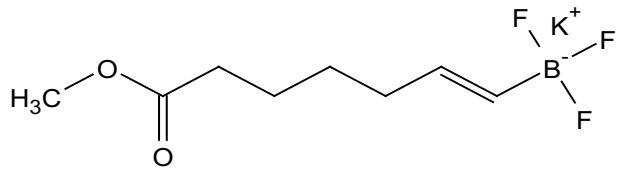

138.98

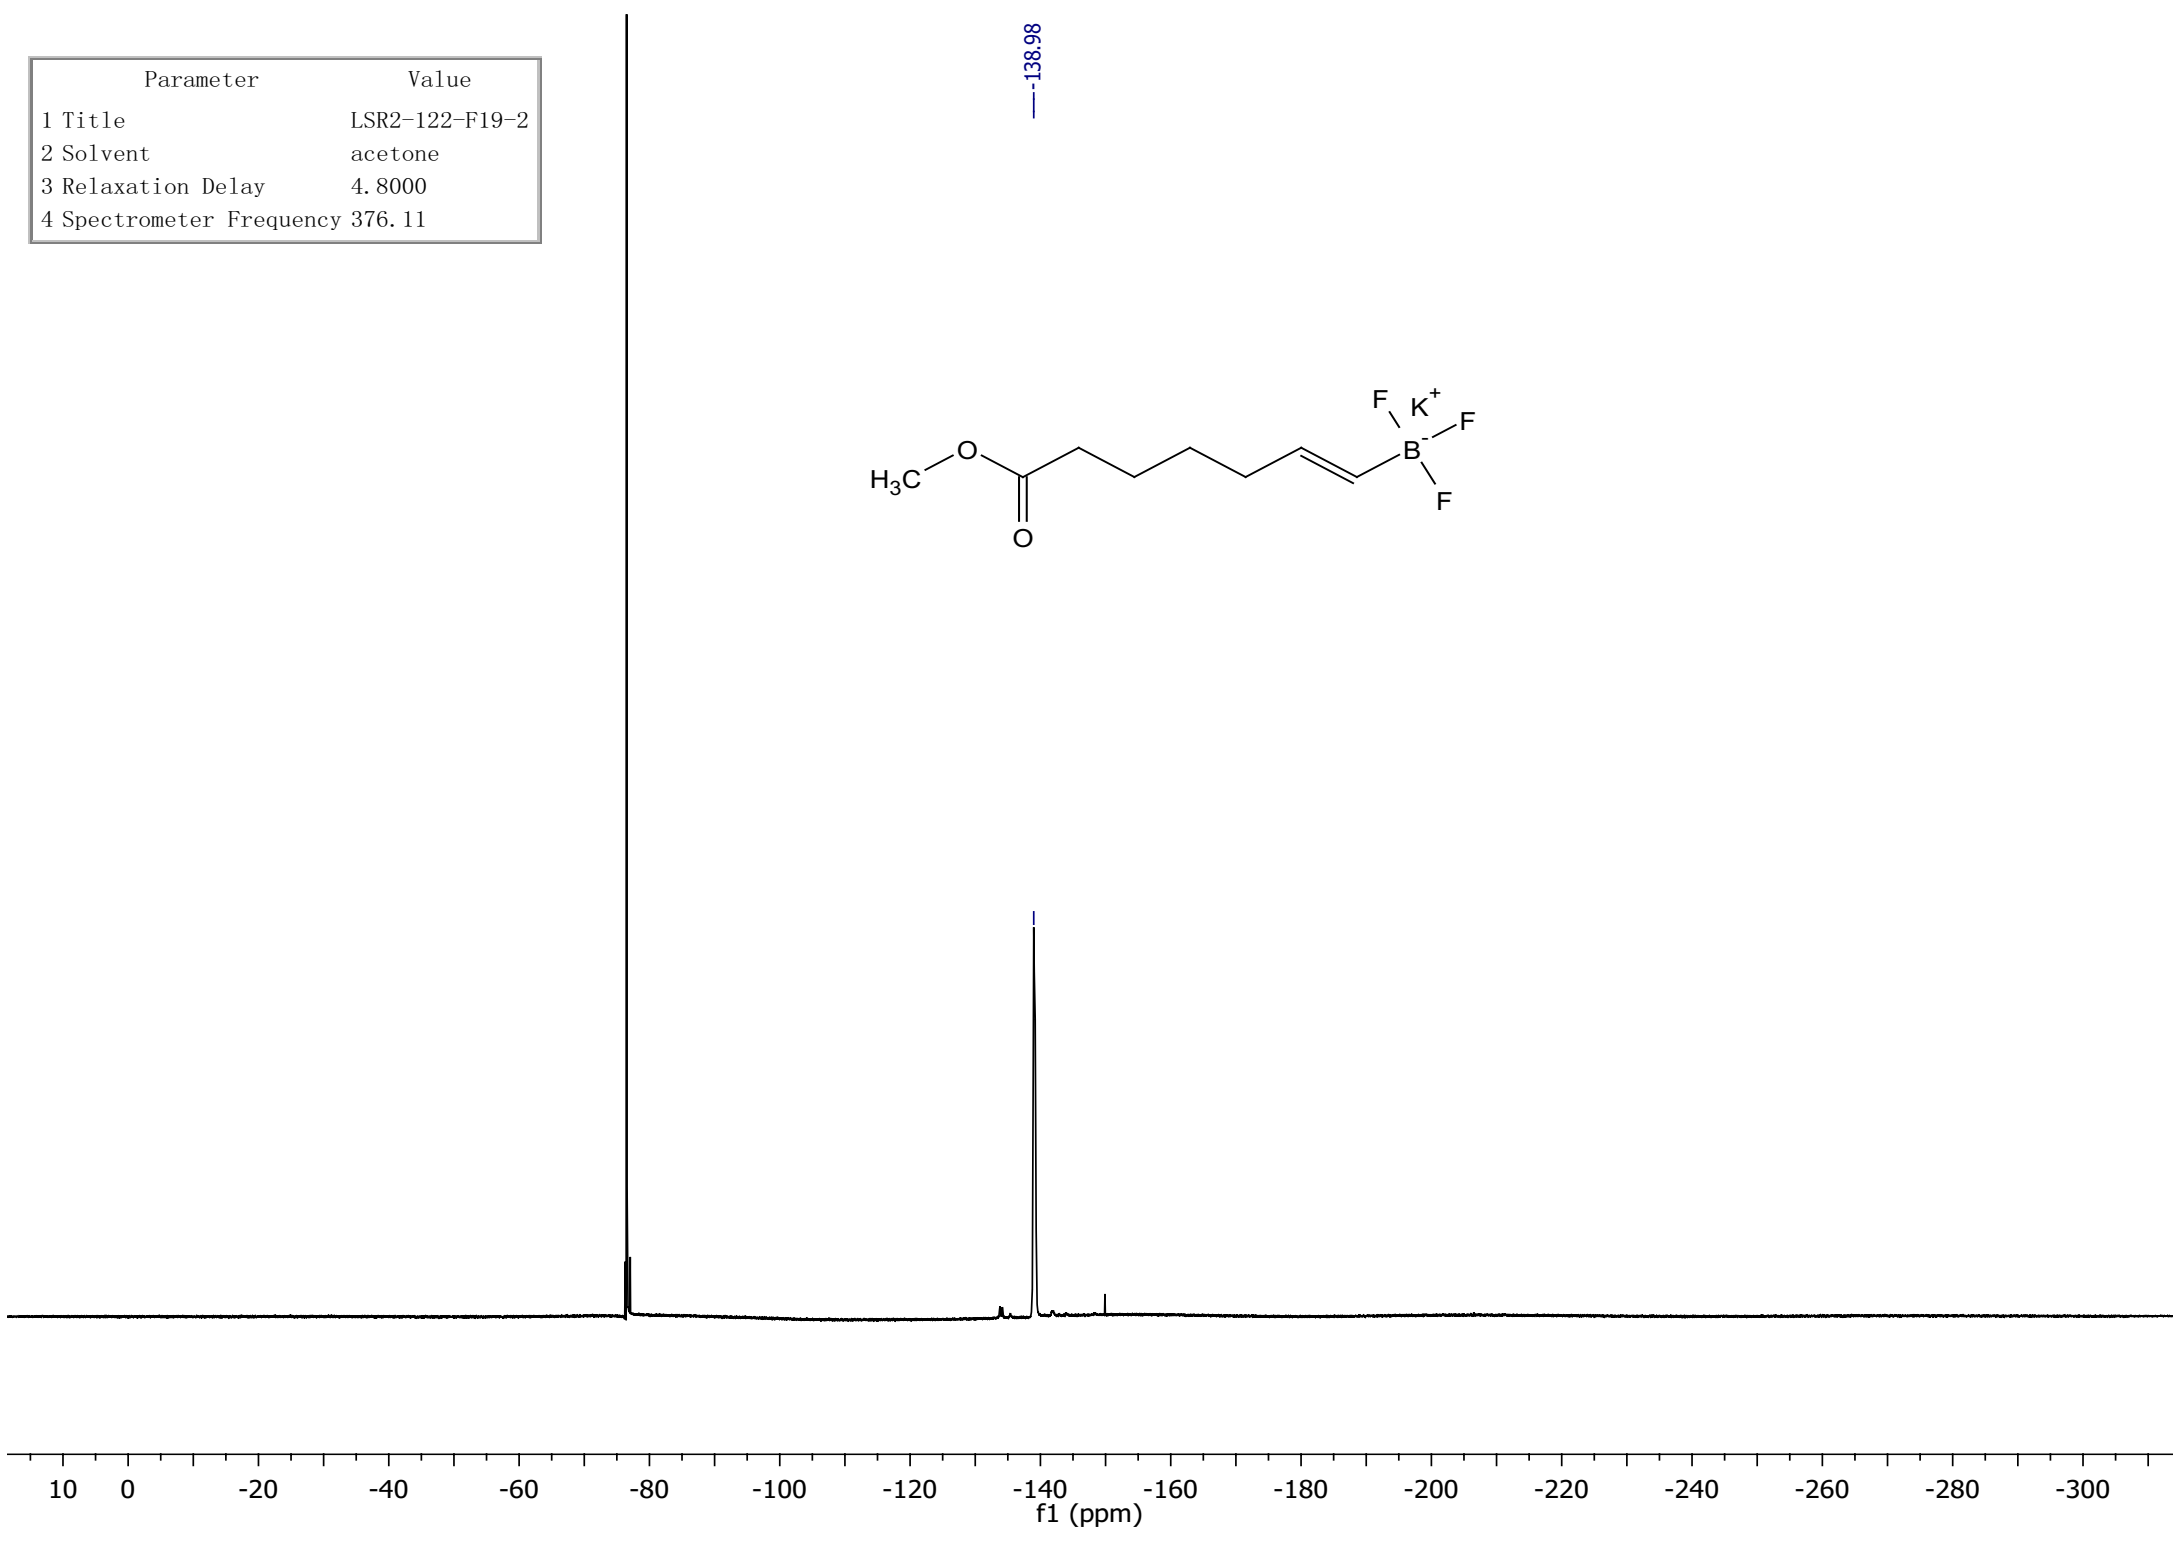

| Parameter                | Value       |
|--------------------------|-------------|
| 1 Title                  | cxp1-218p-H |
| 2 Solvent                | cdcl3       |
| 3 Relaxation Delay       | 10.0000     |
| 4 Spectrometer Frequency | 399.78      |

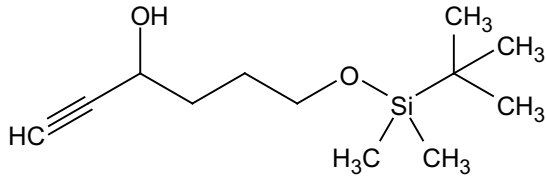

4.39  
4.38  
3.67  
3.64  
3.63  
3.61  
3.60  
3.60  
2.40  
2.39  
1.79  
1.75  
1.67  
1.67  
1.65  
0.87  
0.14  
0.12  
0.04  
0.01  
-0.02

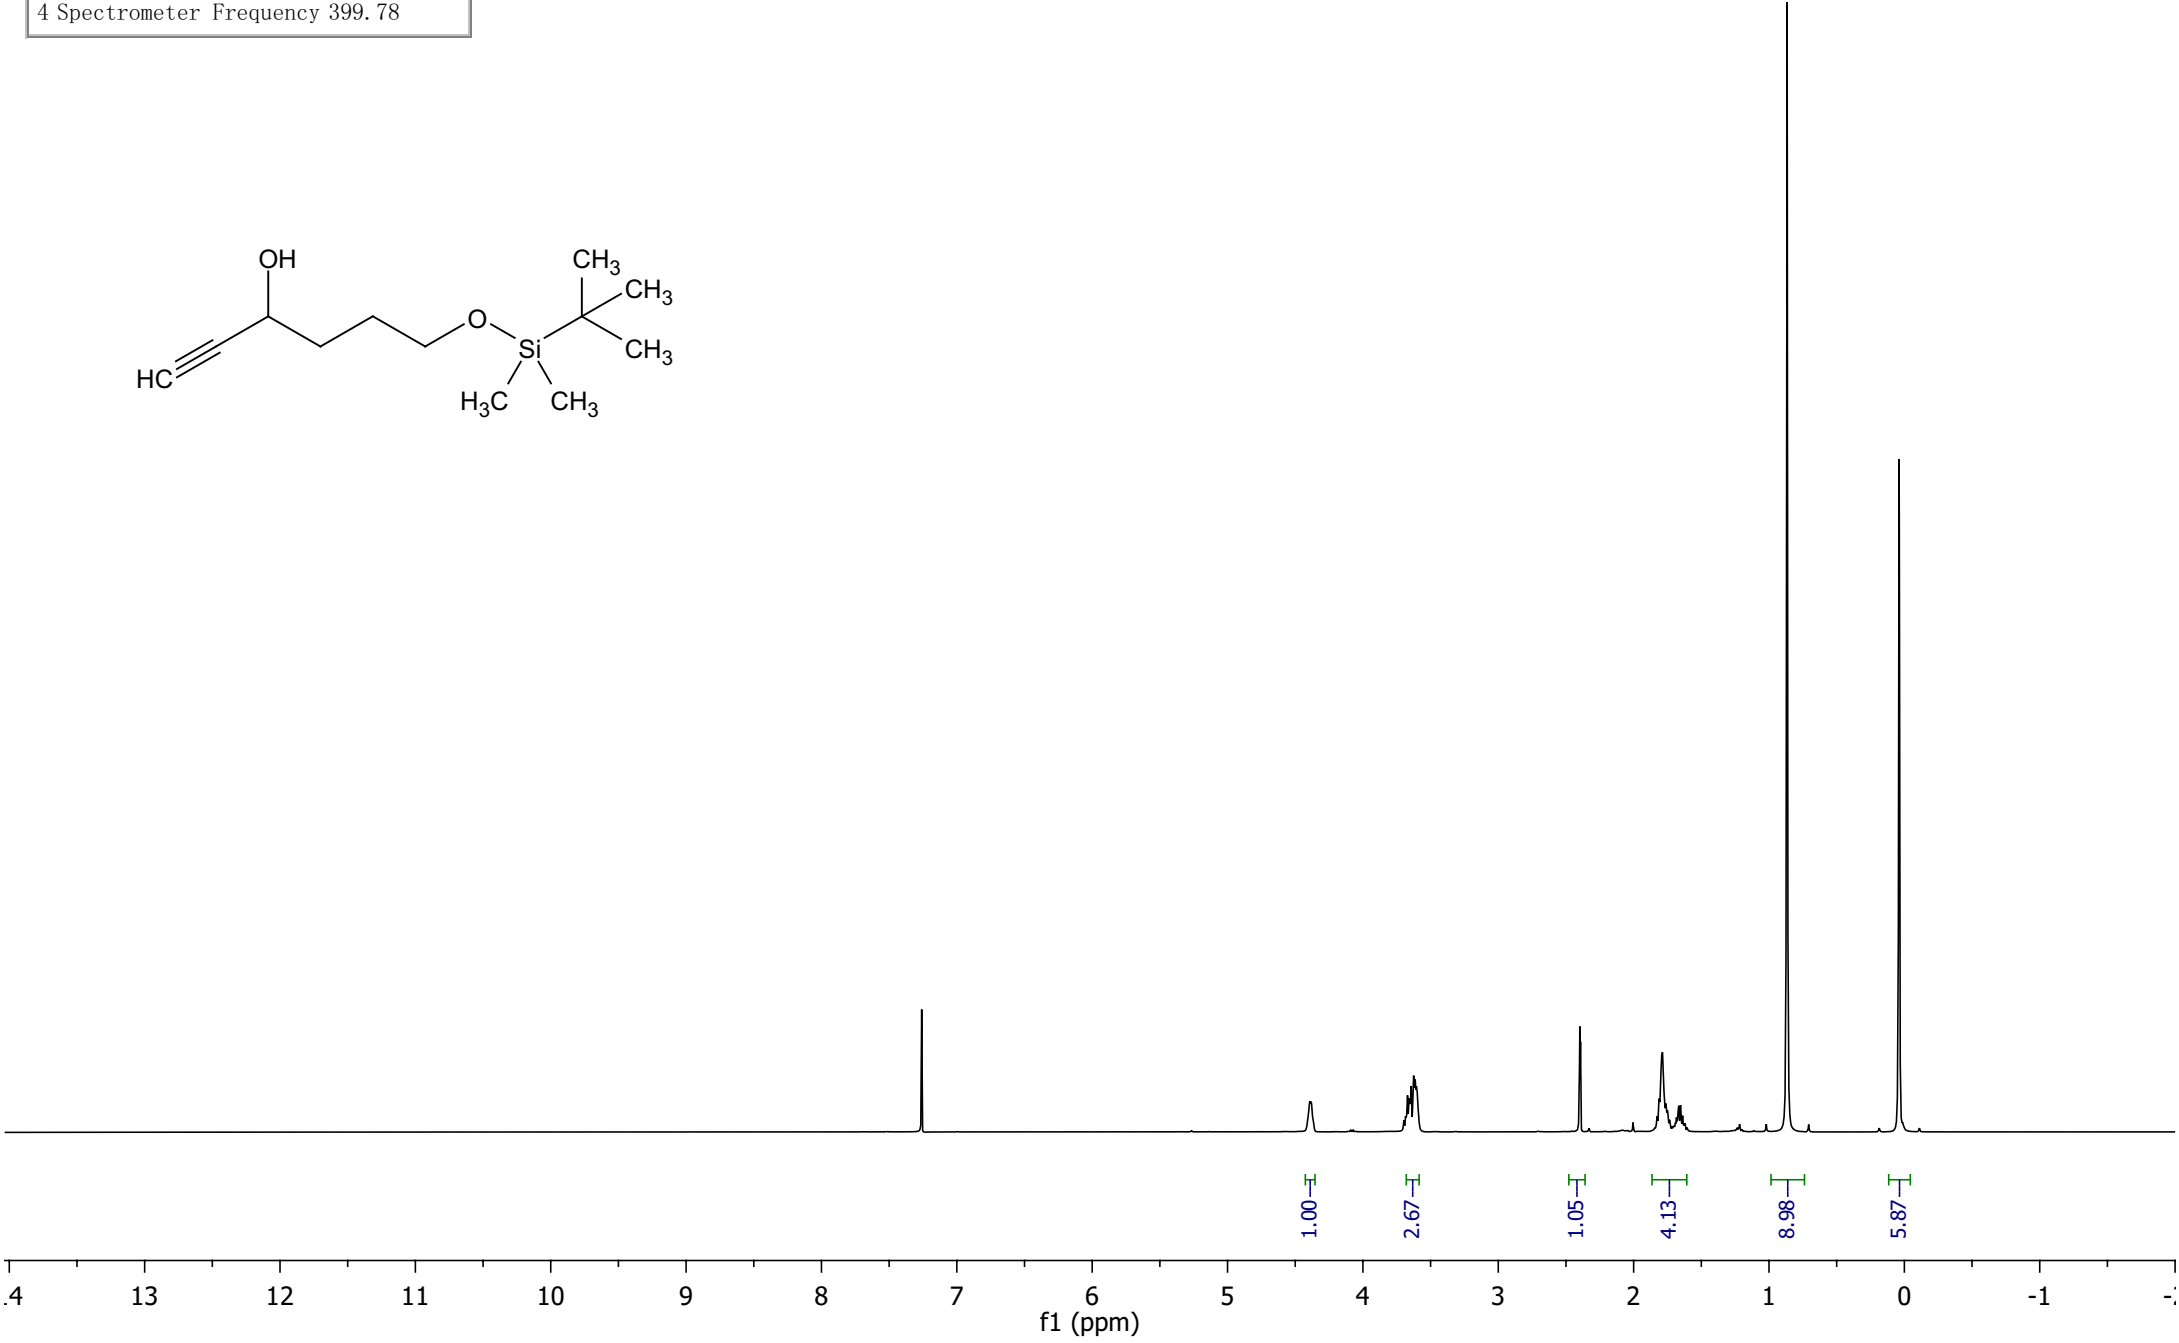

| Parameter                | Value         |
|--------------------------|---------------|
| 1 Title                  | cxp1-218p-C13 |
| 2 Solvent                | cdcl3         |
| 3 Relaxation Delay       | 1.0000        |
| 4 Spectrometer Frequency | 100.53        |

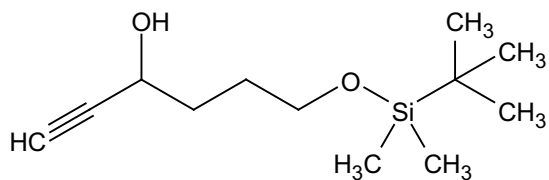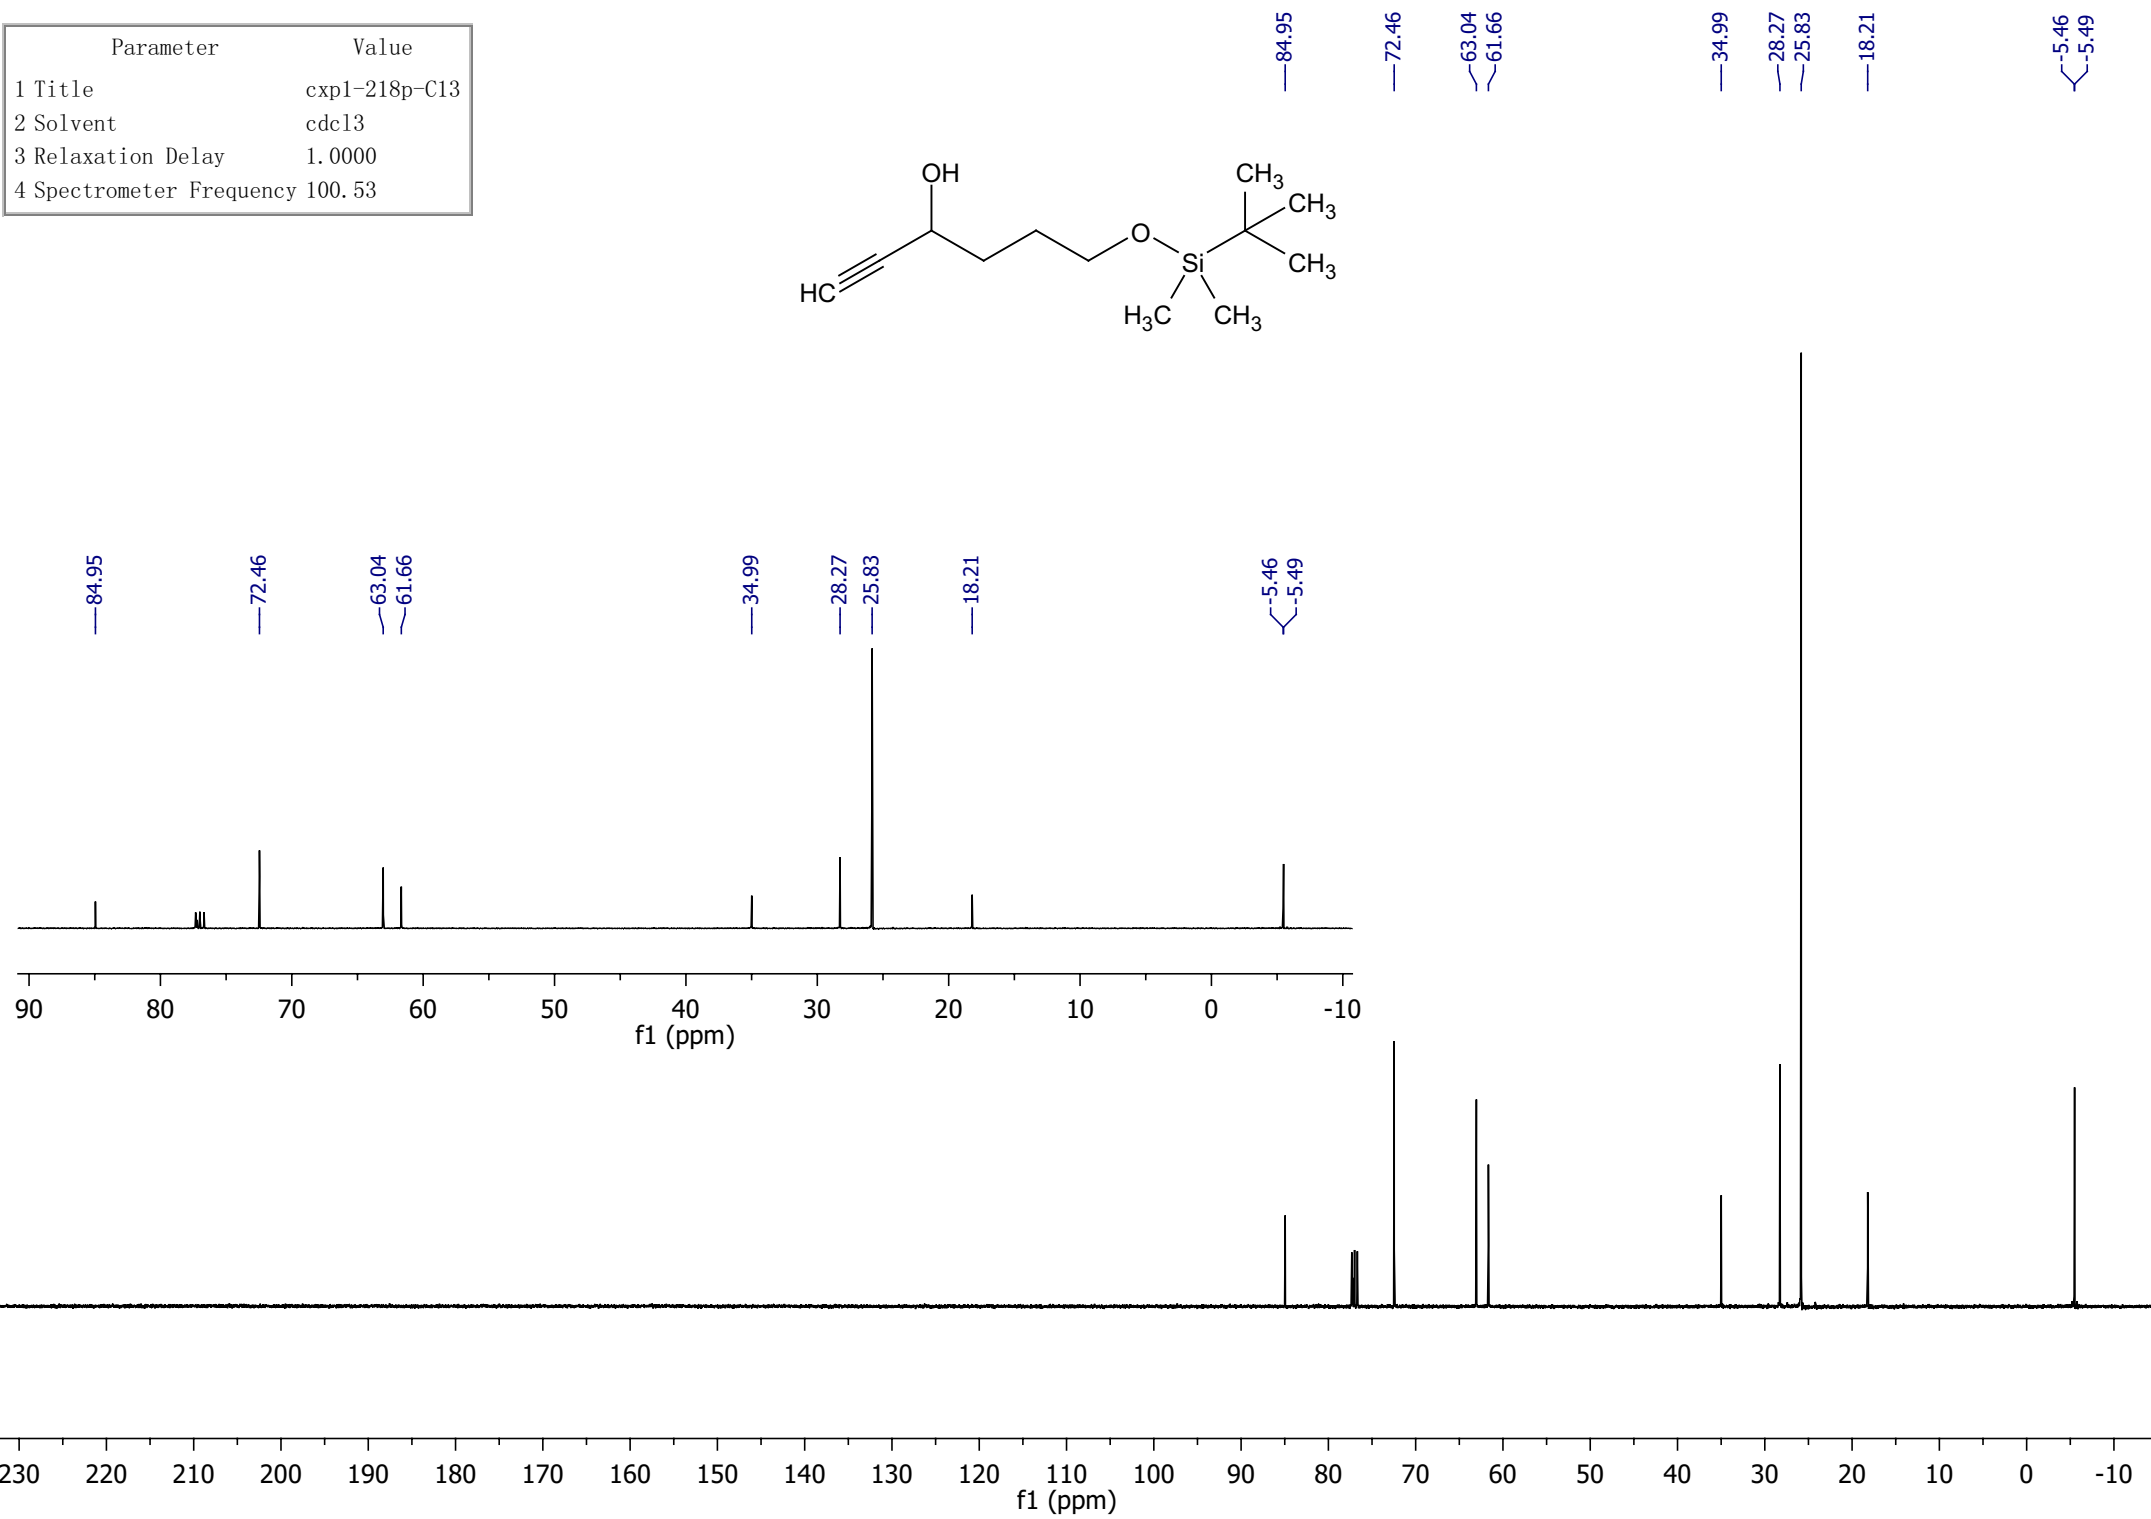

7.83  
7.83  
7.82  
7.82  
7.81  
7.81  
7.80  
7.80  
7.70  
7.69  
7.69  
7.68  
7.68

4.43

3.74  
3.73  
3.71

2.53  
2.45  
2.44

1.89  
1.87  
1.85  
1.83  
1.81  
1.80  
1.78  
1.76  
1.75  
1.73

| Parameter                | Value        |
|--------------------------|--------------|
| 1 Title                  | LSR2-155-ST1 |
| 2 Solvent                | cdcl3        |
| 3 Relaxation Delay       | 4.8000       |
| 4 Spectrometer Frequency | 399.78       |

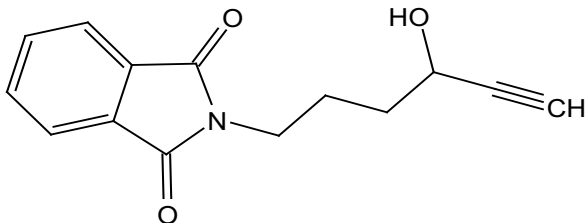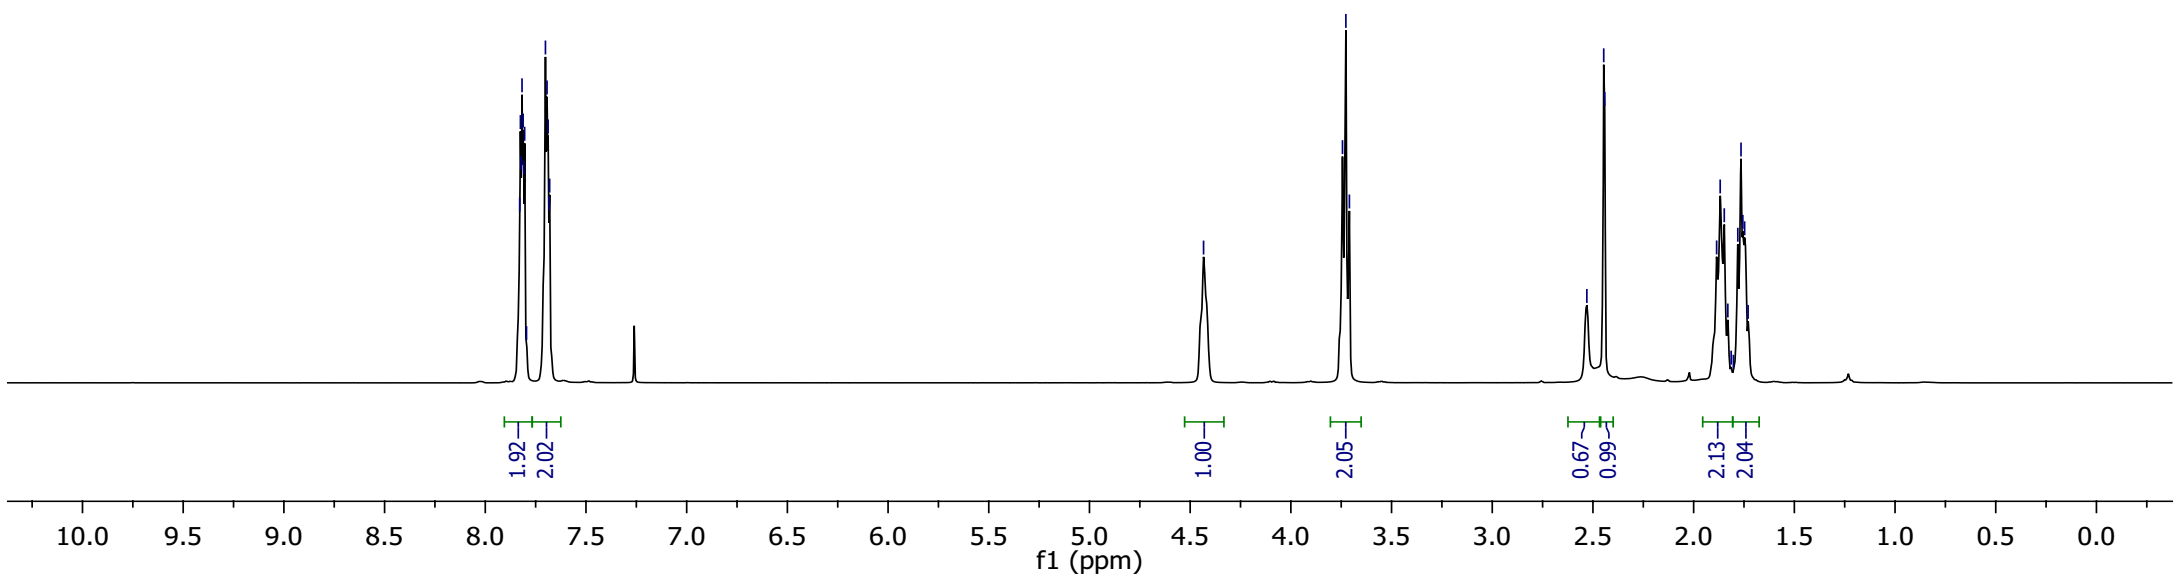

1.92  
2.02

1.00

2.05

0.67  
0.99

2.13  
2.04

| Parameter                | Value          |
|--------------------------|----------------|
| 1 Title                  | LSR2-155-ST1-C |
| 2 Solvent                | cdc13          |
| 3 Relaxation Delay       | 1.0000         |
| 4 Spectrometer Frequency | 100.53         |

— 168.43

— 133.91

— 131.94

— 123.19

— 84.40

— 73.18

— 61.60

— 37.46

— 34.52

— 24.27

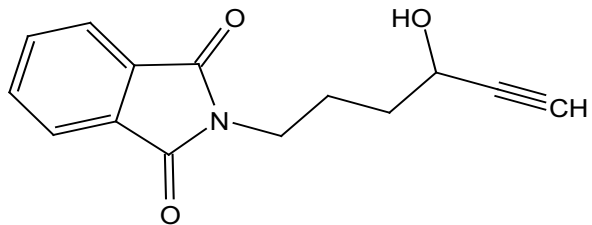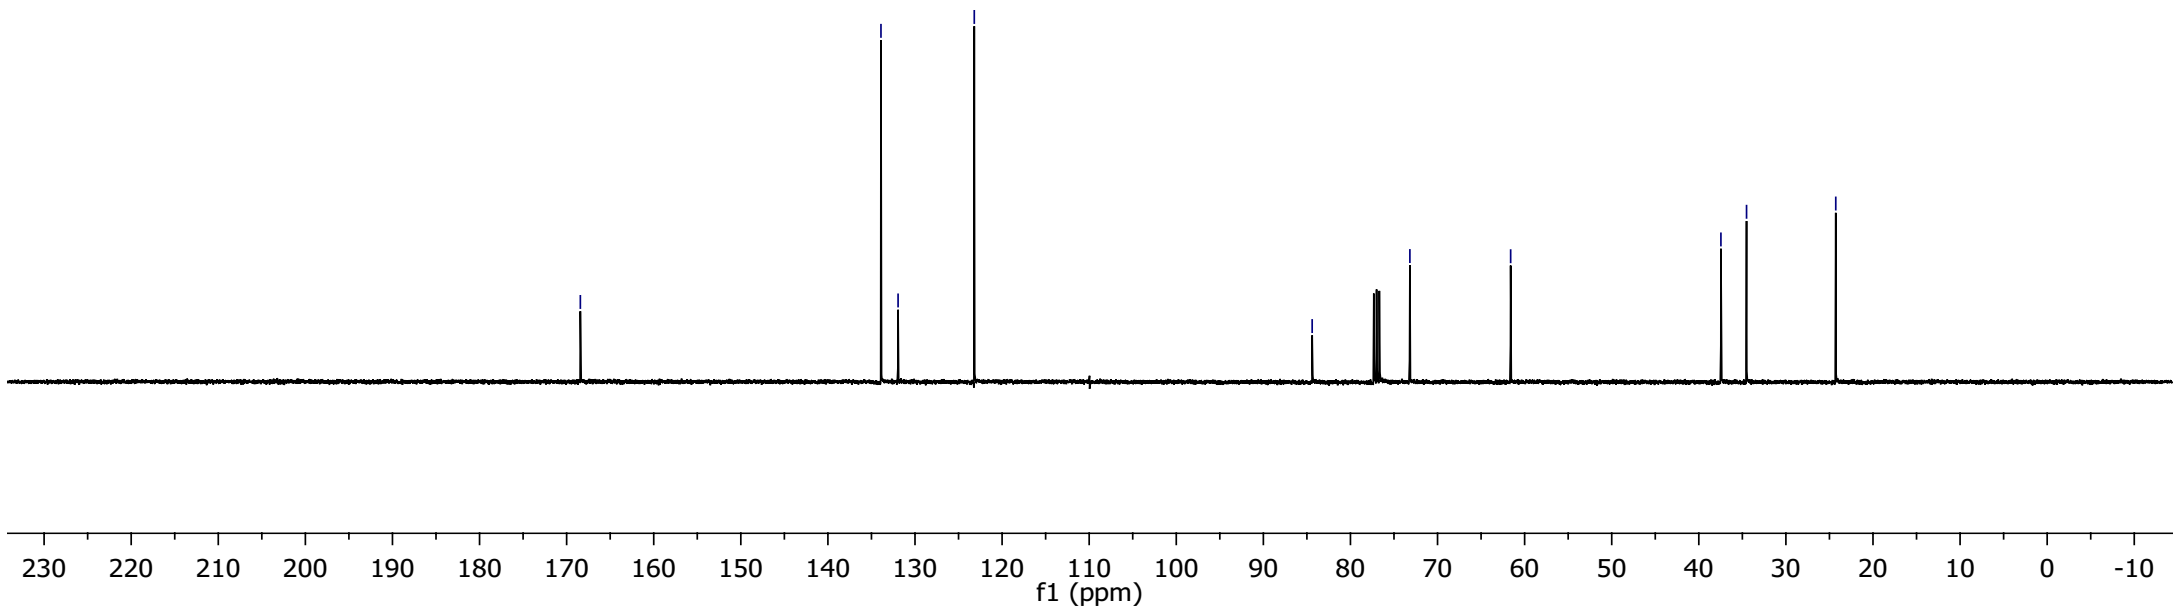

| Parameter                | Value        |
|--------------------------|--------------|
| 1 Title                  | LSR2-119-TM1 |
| 2 Solvent                | CDCl3        |
| 3 Relaxation Delay       | 4.8000       |
| 4 Spectrometer Frequency | 499.86       |

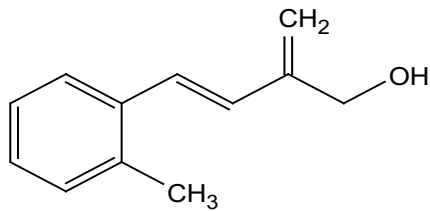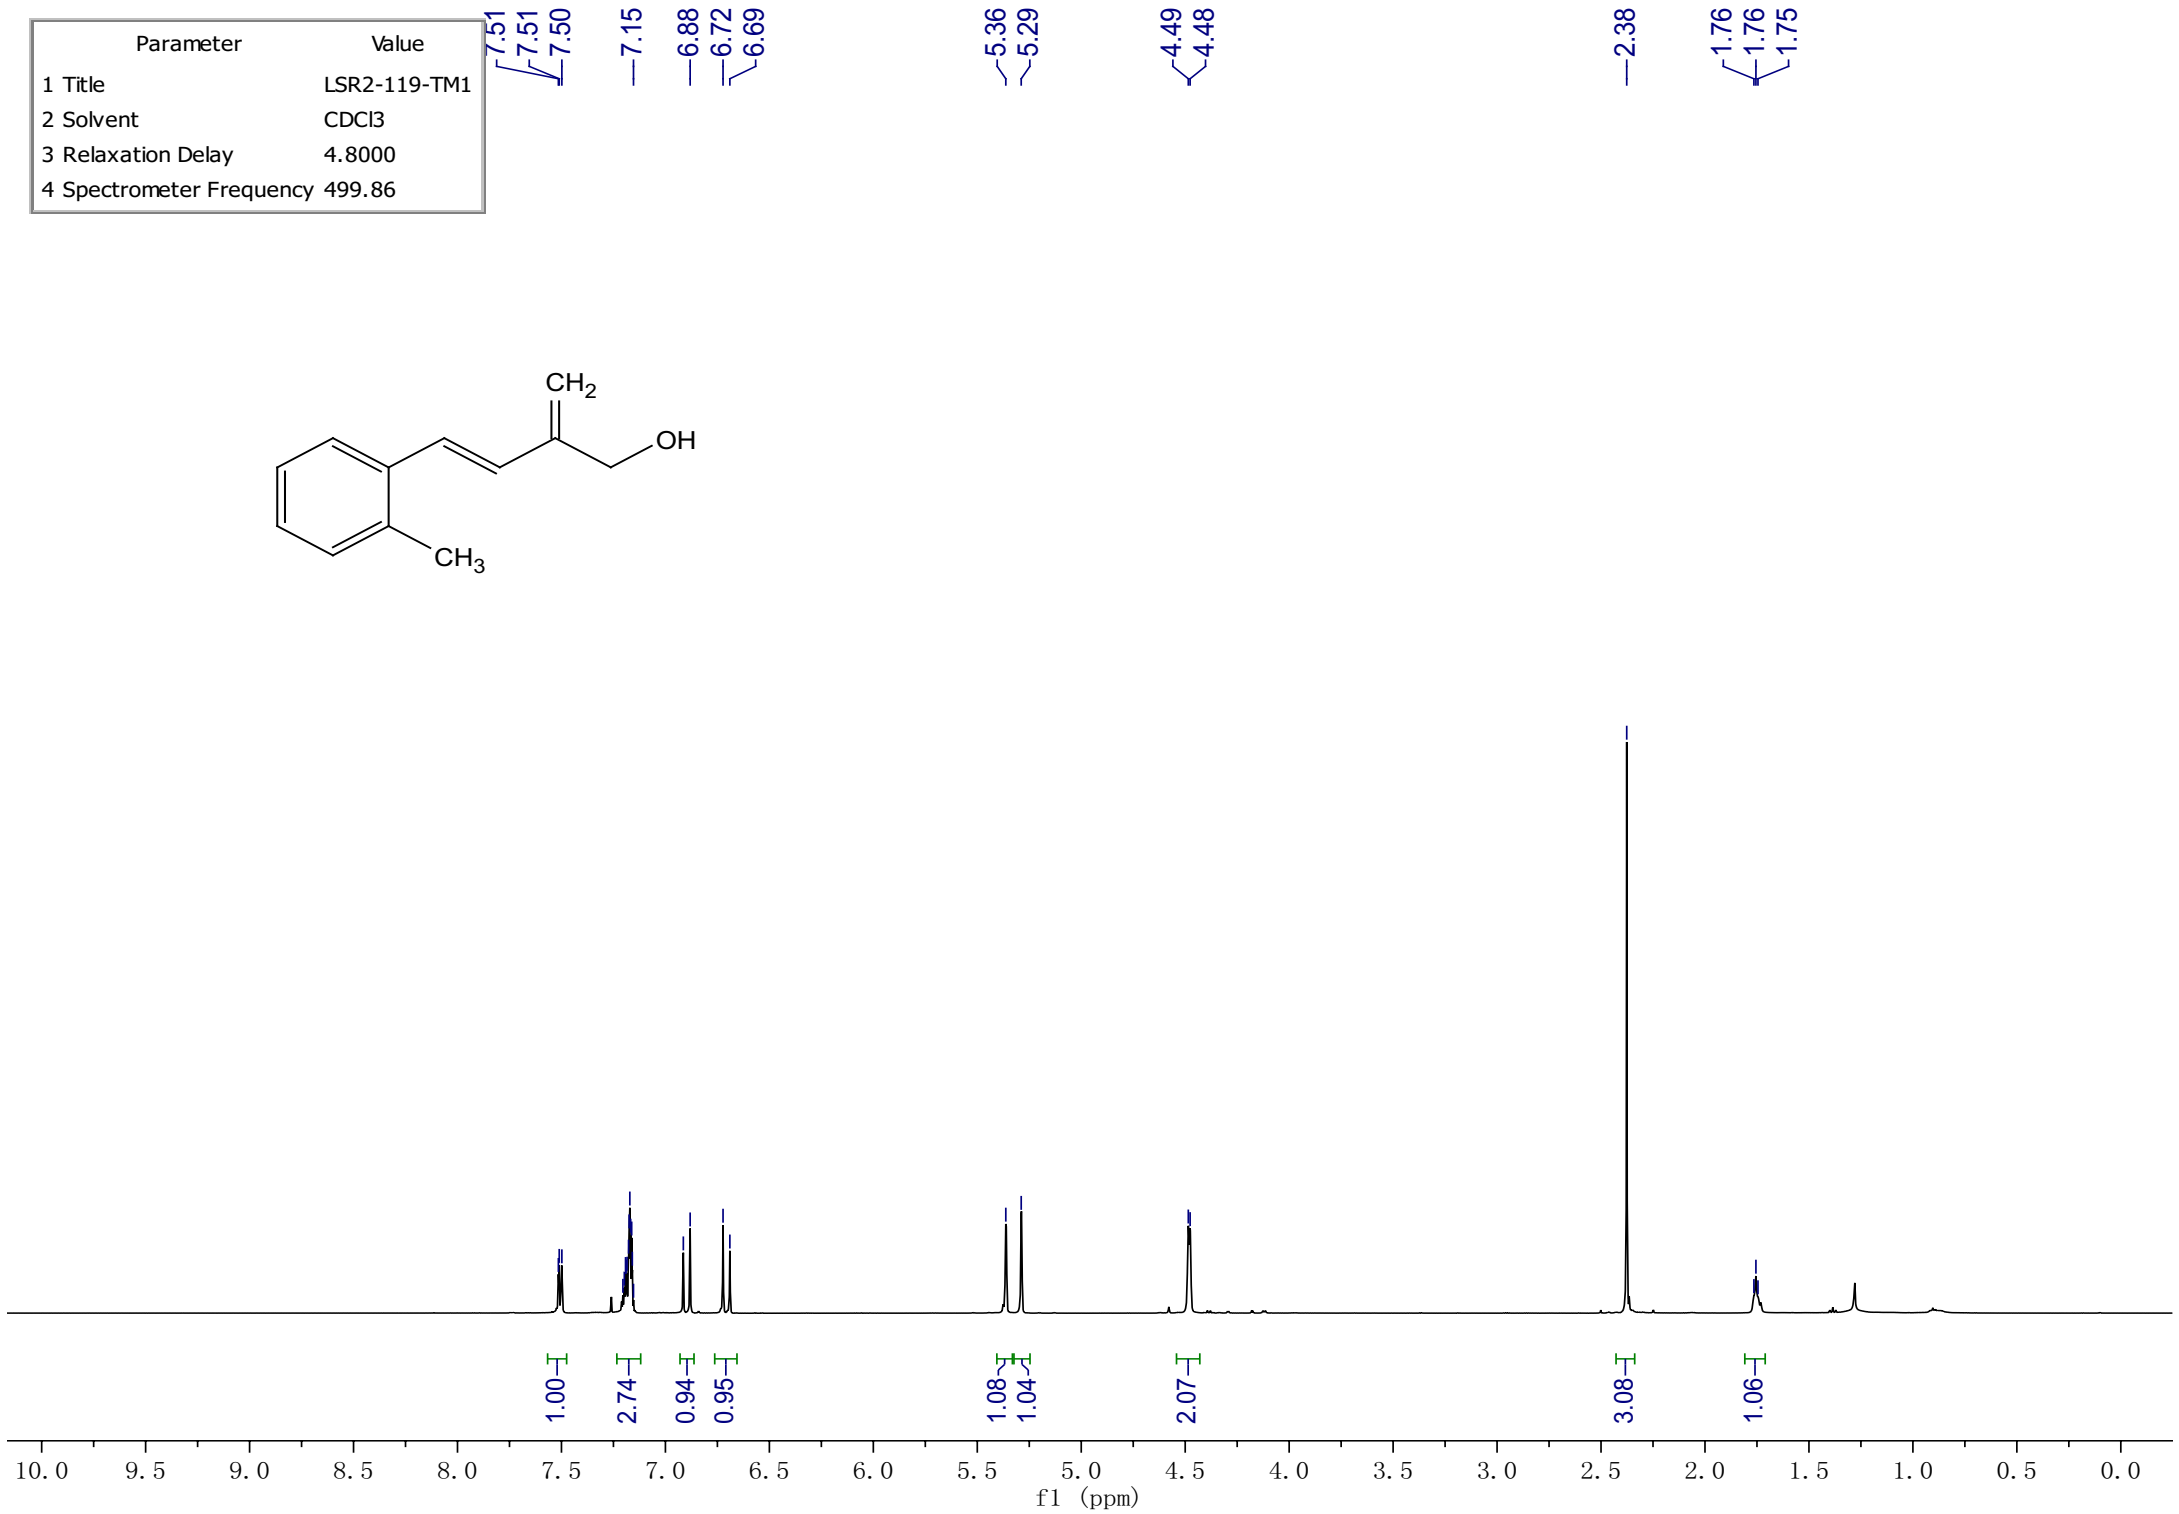

| Parameter                | Value          |
|--------------------------|----------------|
| 1 Title                  | LSR2-119-TM1-C |
| 2 Solvent                | CDCl3          |
| 3 Relaxation Delay       | 1.0000         |
| 4 Spectrometer Frequency | 125.70         |

—145.30  
 —136.08  
 —135.72  
 —129.39  
 —126.54  
 —125.15  
 —115.93

—63.20

—19.74

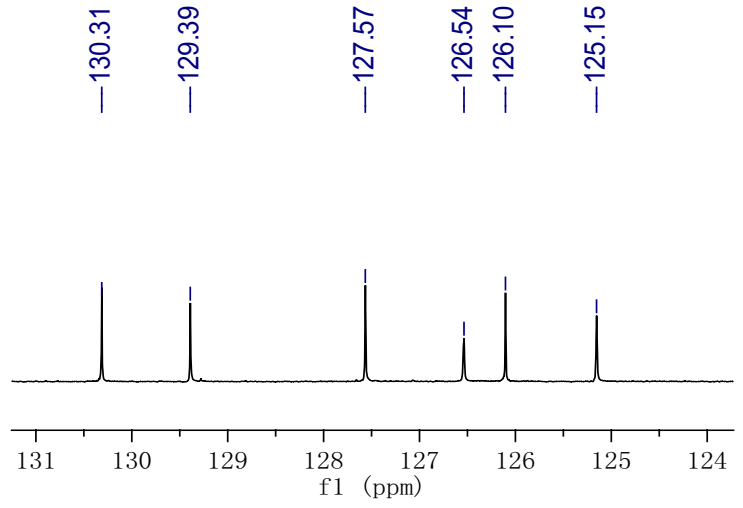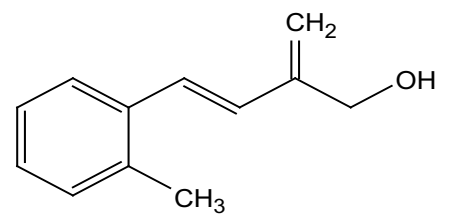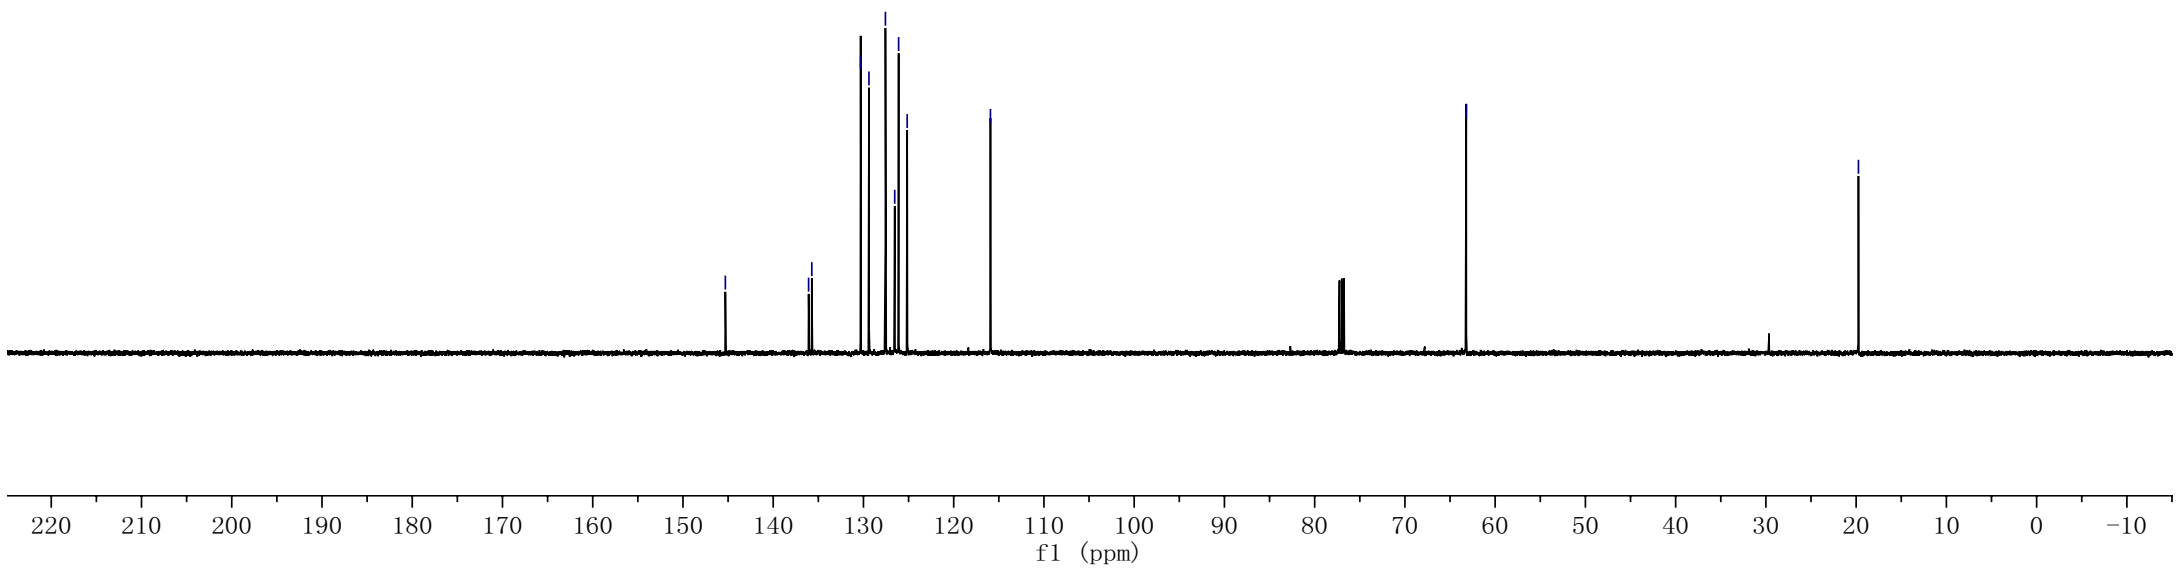



| Parameter                | Value      |
|--------------------------|------------|
| 1 Title                  | LSR1-233-1 |
| 2 Solvent                | CDCl3      |
| 3 Relaxation Delay       | 4.8000     |
| 4 Spectrometer Frequency | 499.86     |

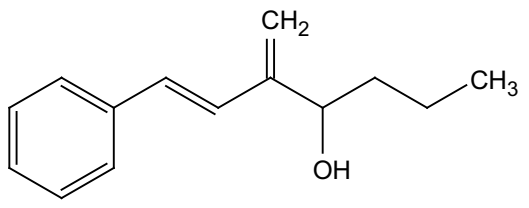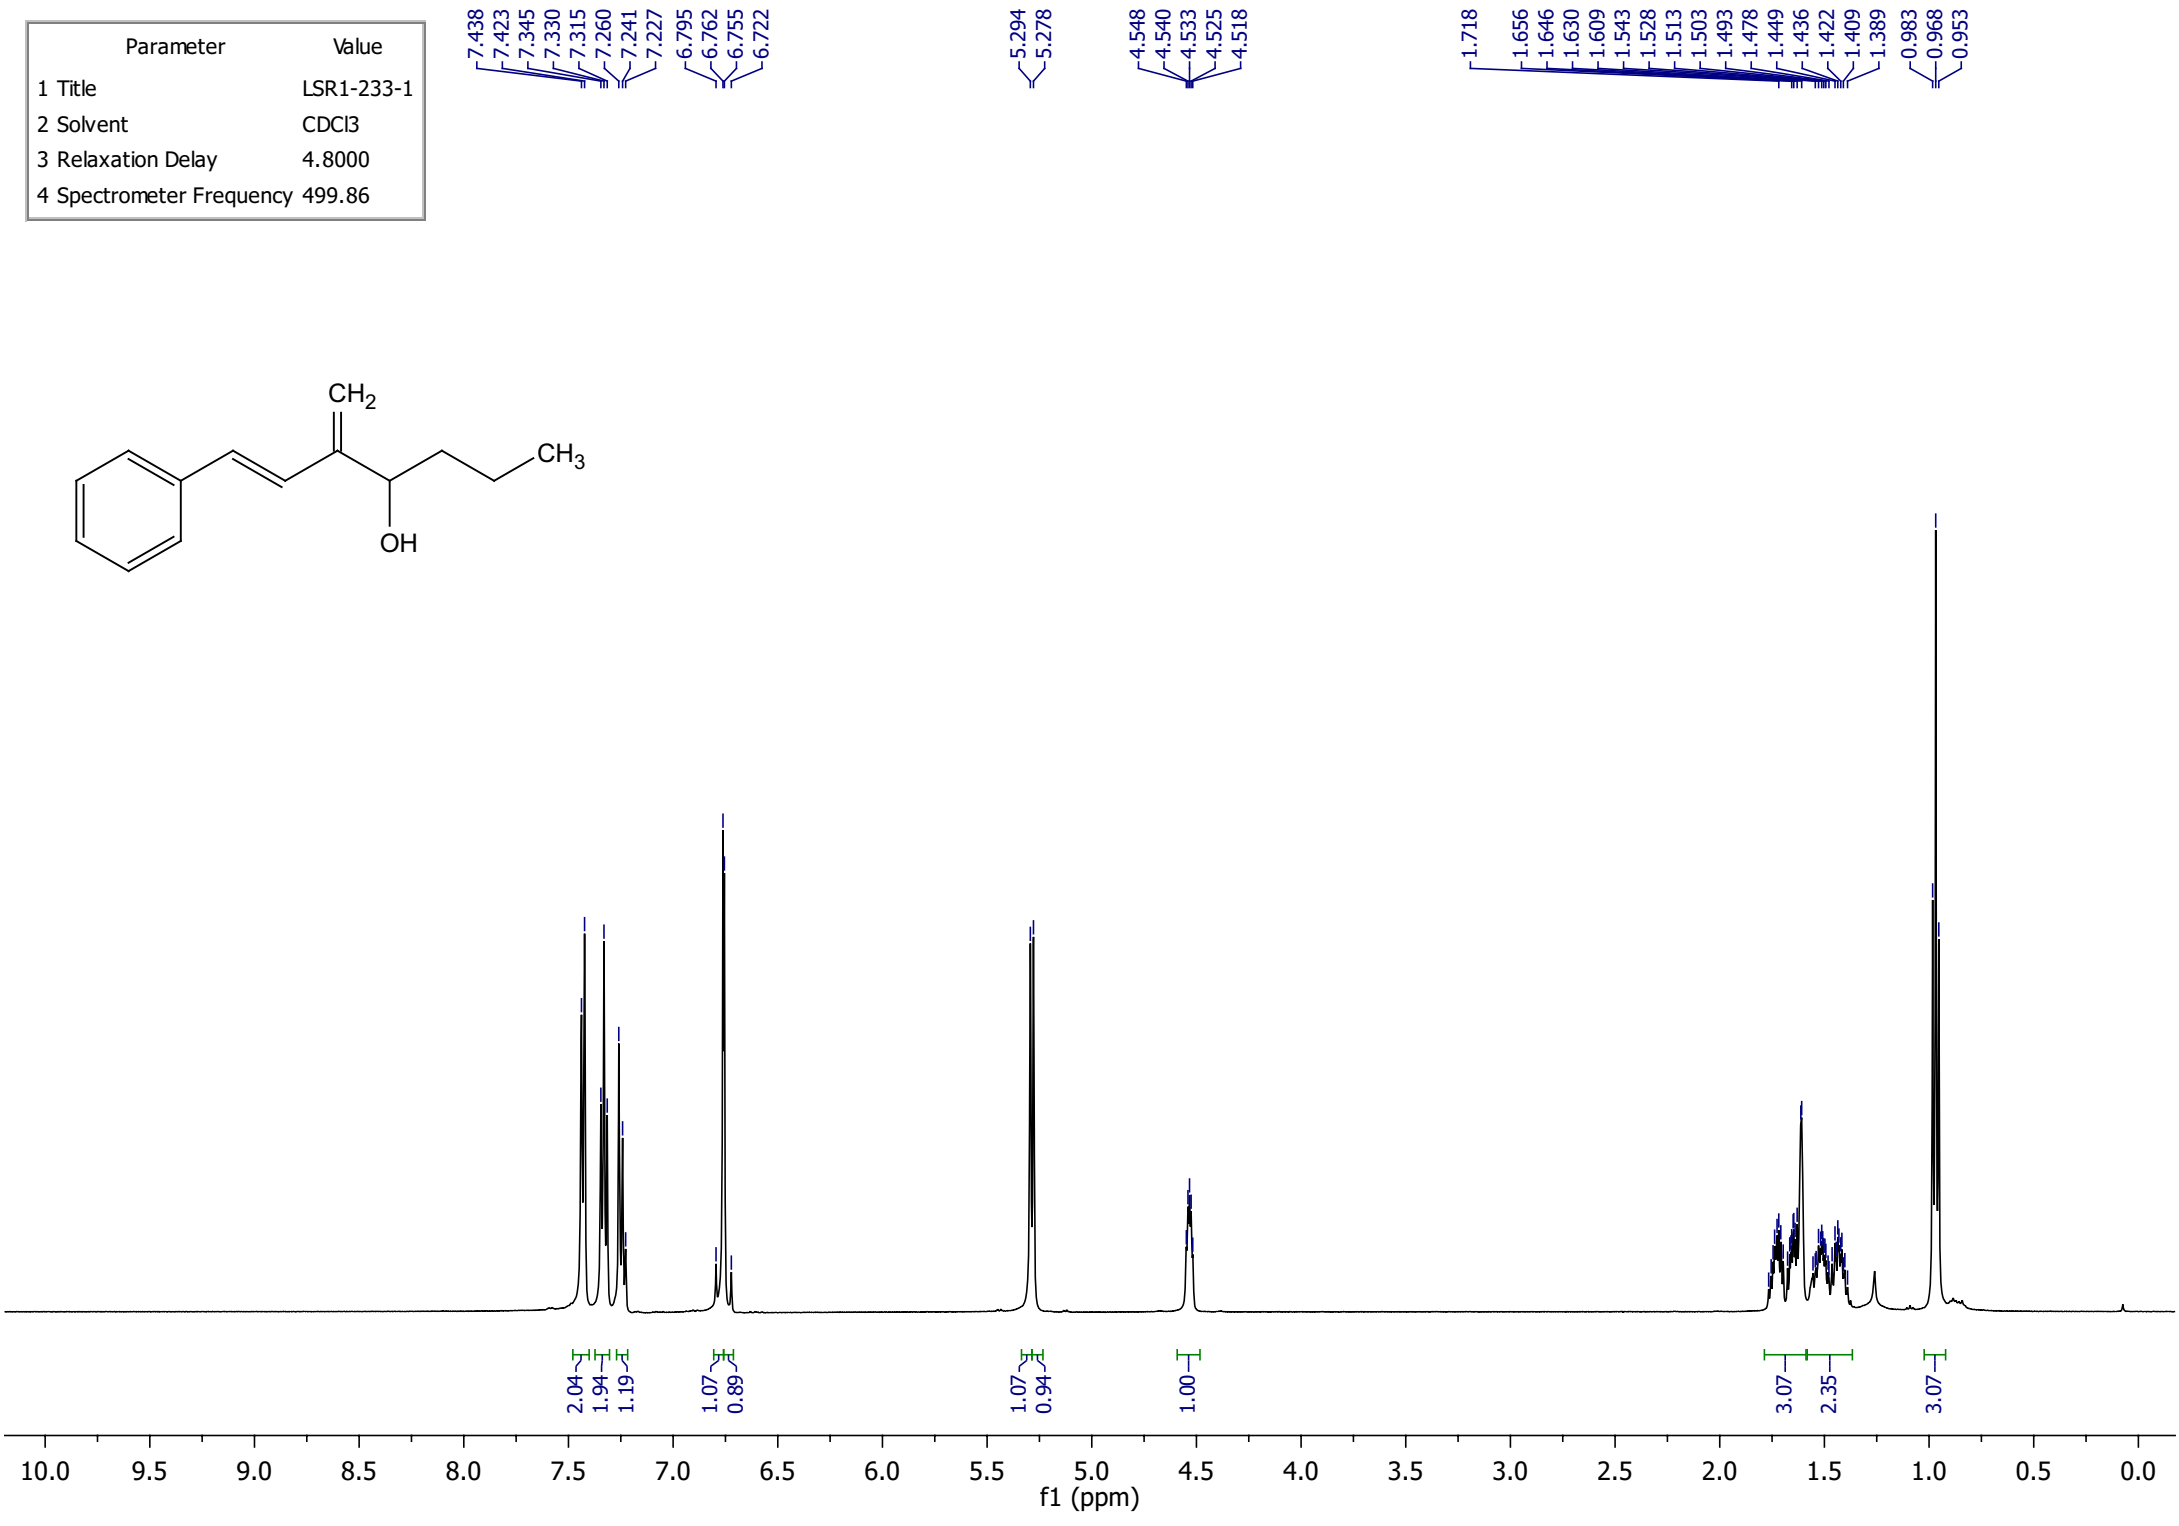

| Parameter                | Value       |
|--------------------------|-------------|
| 1 Title                  | LSR1-233-1C |
| 2 Solvent                | CDCl3       |
| 3 Relaxation Delay       | 1.0000      |
| 4 Spectrometer Frequency | 125.70      |

—149.00      —137.17      —128.93  
                 —128.62      —127.93  
                 —127.64      —126.44      —114.08      —72.07      —38.63      —19.06      —14.00

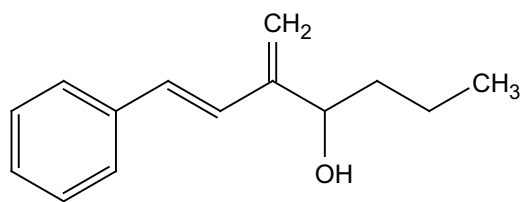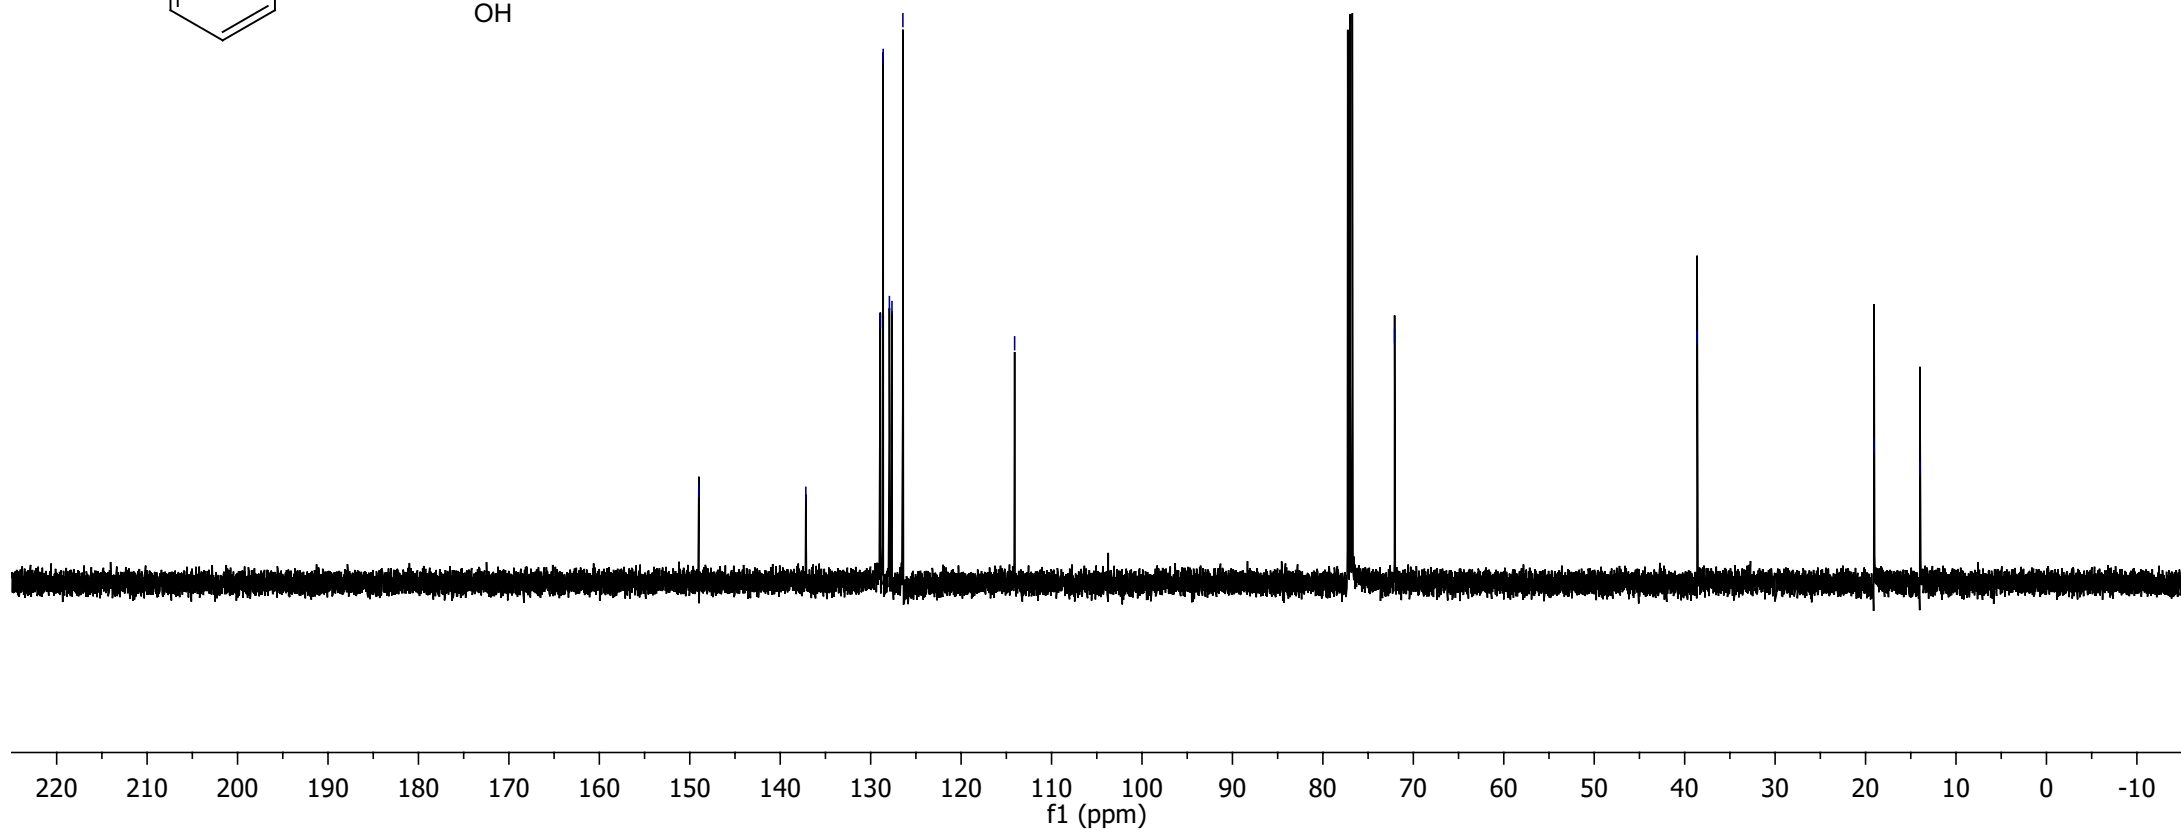

| Parameter                | Value      |
|--------------------------|------------|
| 1 Title                  | LSR1-257-2 |
| 2 Solvent                | CDCl3      |
| 3 Relaxation Delay       | 4.8000     |
| 4 Spectrometer Frequency | 499.86     |

7.439  
7.424  
7.345  
7.330  
7.314  
7.260  
7.244  
7.229  
6.835  
6.802  
6.687  
6.654  
5.354  
5.285  
4.469  
4.460

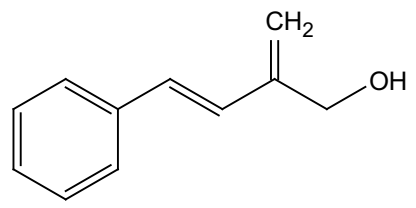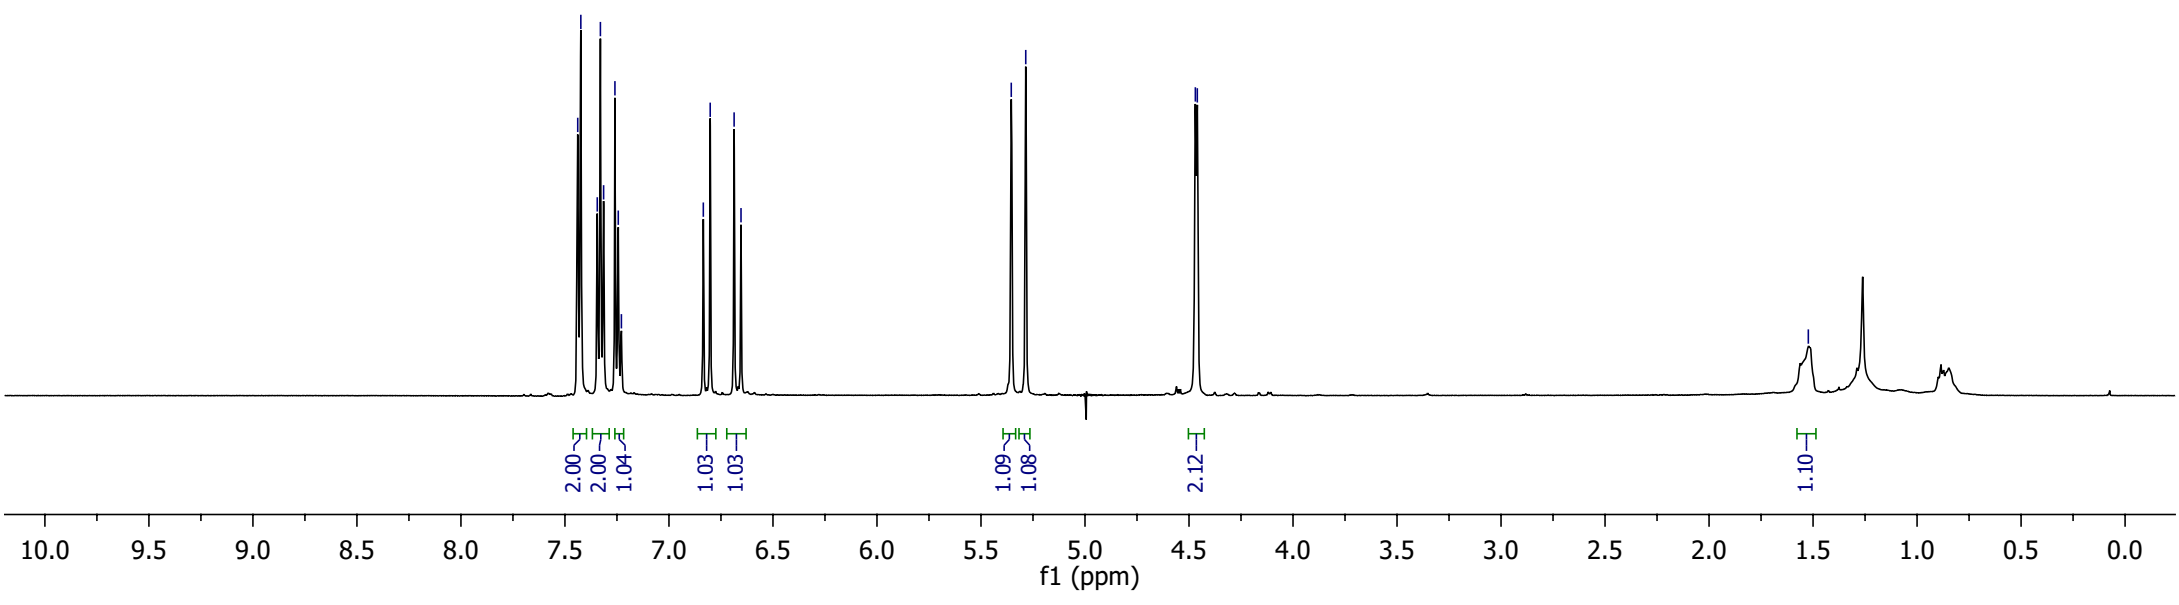

| Parameter                | Value       |
|--------------------------|-------------|
| 1 Title                  | LSR1-257-2C |
| 2 Solvent                | CDCl3       |
| 3 Relaxation Delay       | 1.0000      |
| 4 Spectrometer Frequency | 125.70      |

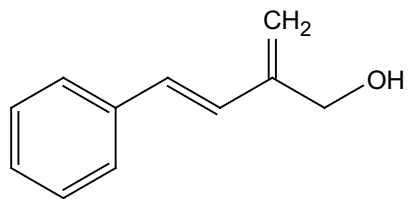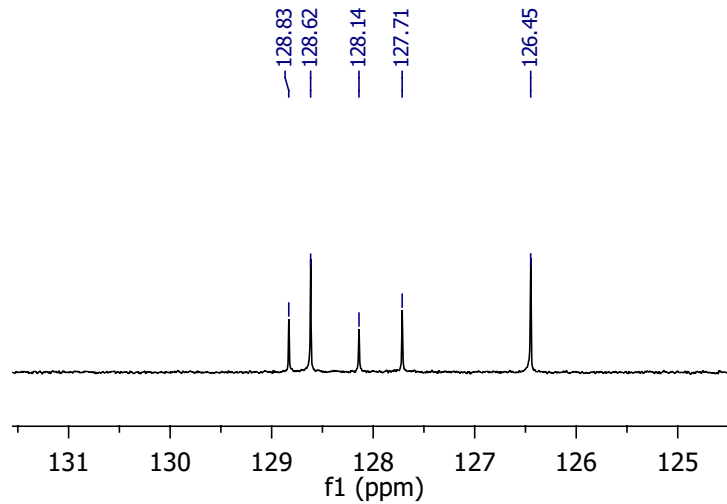

145.04  
137.01  
128.83  
128.62  
128.14  
127.71  
126.45  
116.19

63.23

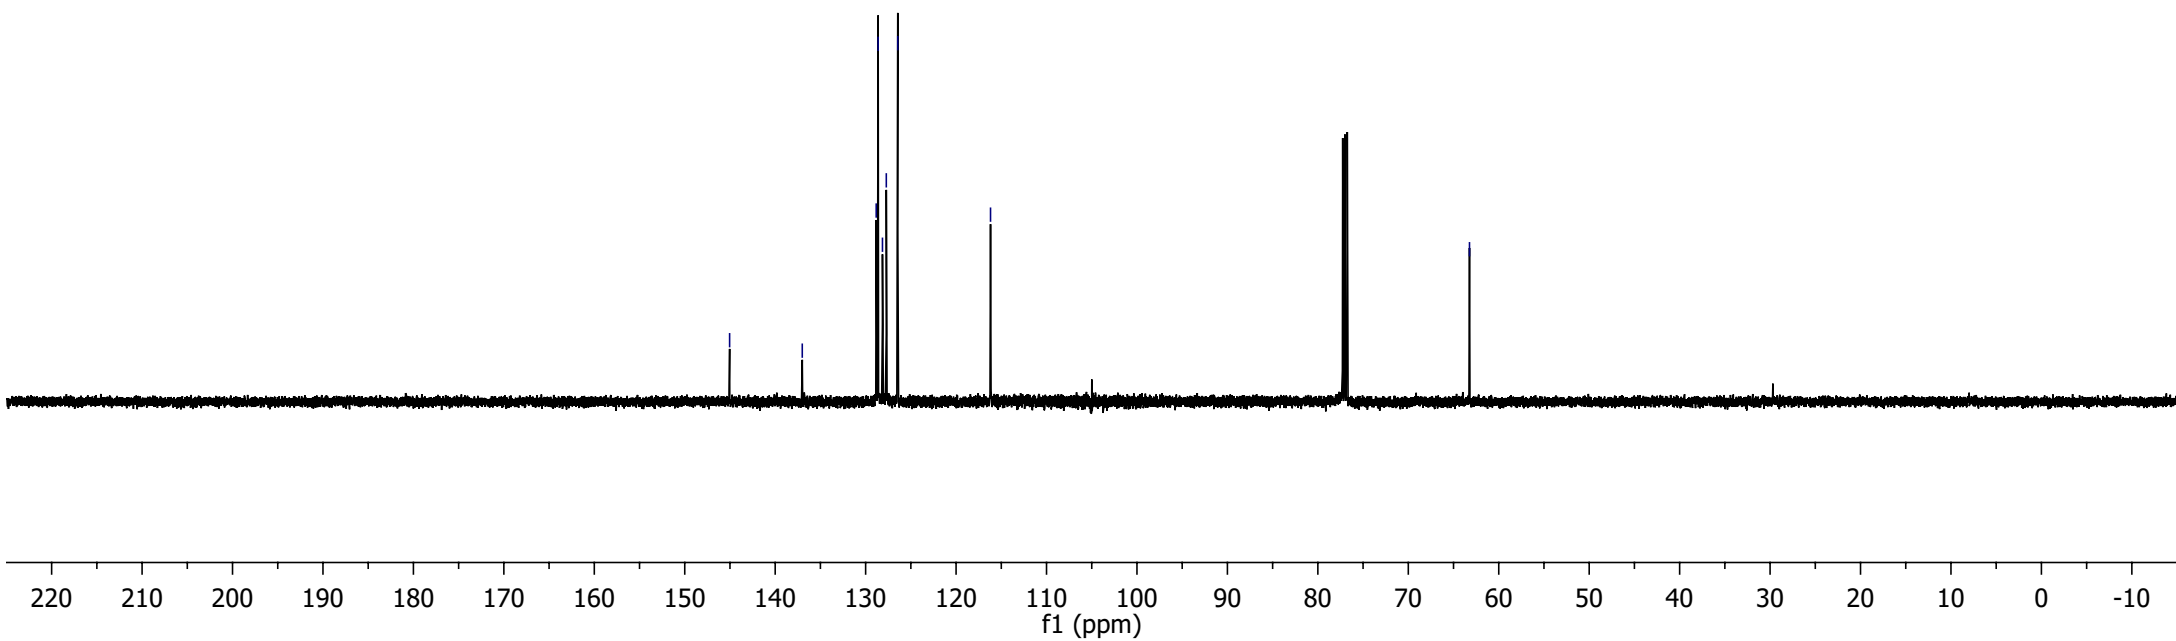

| Parameter                | Value      |
|--------------------------|------------|
| 1 Title                  | LSR1-253-1 |
| 2 Solvent                | CDCl3      |
| 3 Relaxation Delay       | 4.8000     |
| 4 Spectrometer Frequency | 499.86     |

7.438  
7.423  
7.346  
7.331  
7.316  
7.258  
7.243  
7.228  
6.805  
6.771  
6.745  
6.711

5.345  
5.250  
4.754  
4.742  
4.734  
4.729  
4.722  
4.709

1.635  
1.453  
1.440

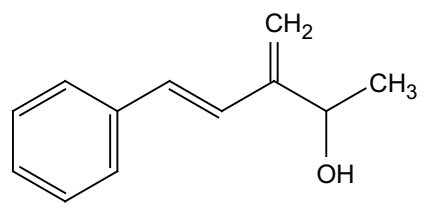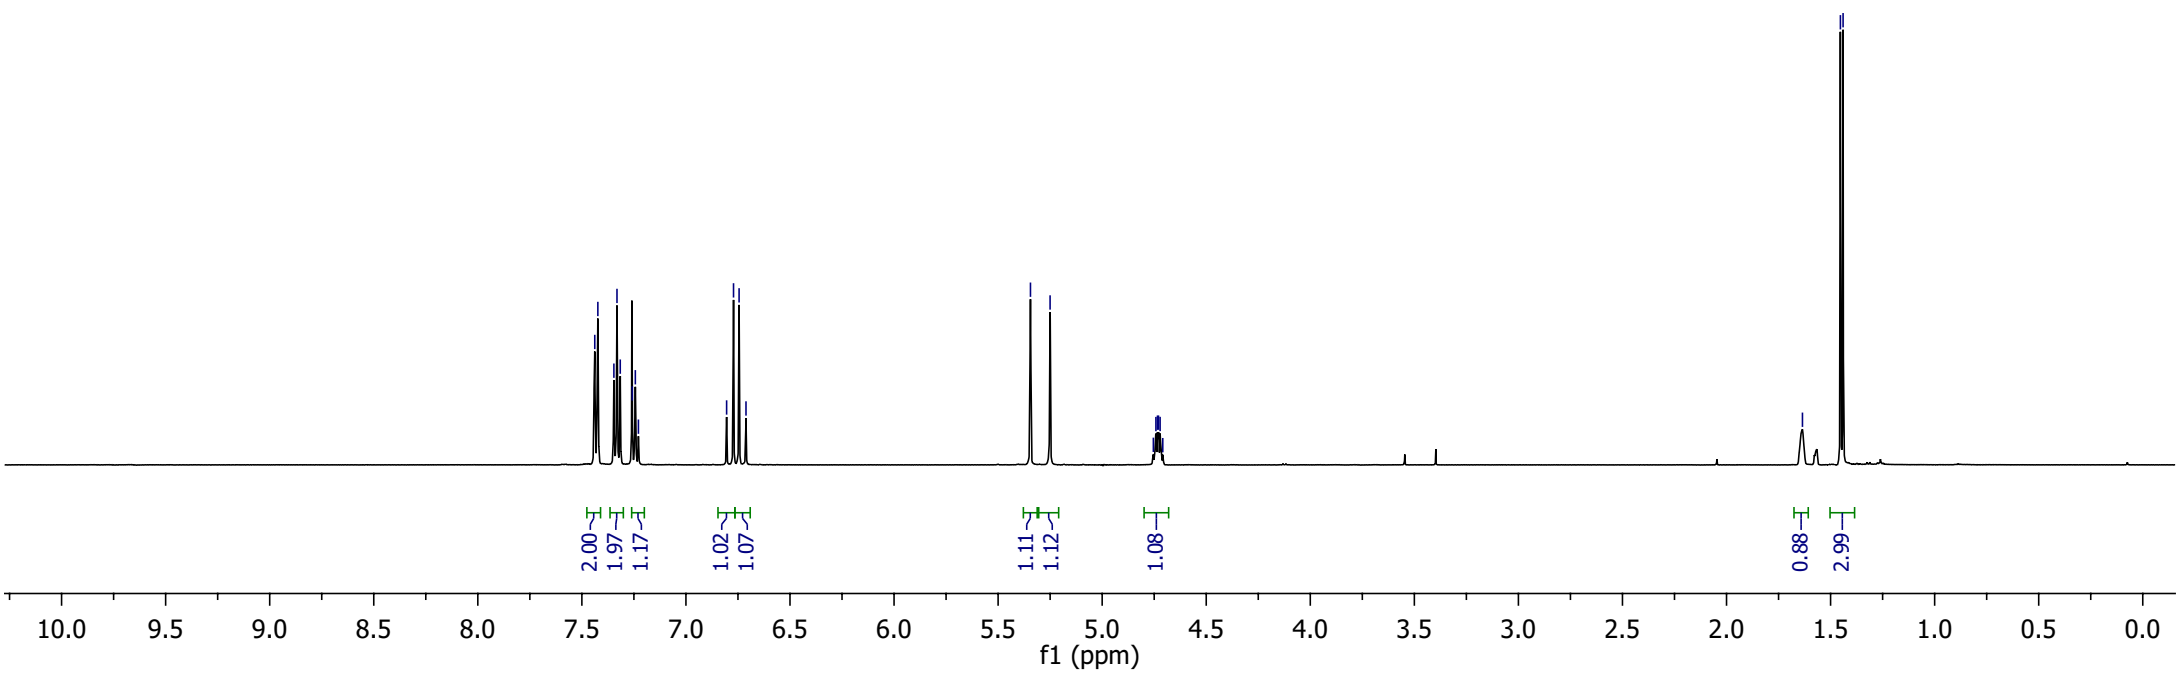

2.00  
1.97  
1.17

1.02  
1.07

1.11  
1.12

1.08

0.88

2.99

| Parameter                | Value       |
|--------------------------|-------------|
| 1 Title                  | LSR1-253-1C |
| 2 Solvent                | CDCl3       |
| 3 Relaxation Delay       | 1.0000      |
| 4 Spectrometer Frequency | 125.70      |

— 150.05      — 137.13      — 128.91      — 128.62      — 128.03      — 127.66      — 126.43      — 113.49      — 67.78      — 22.97

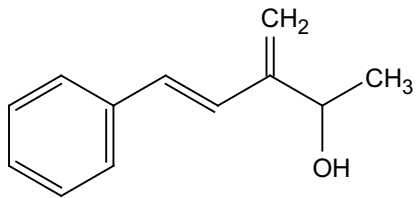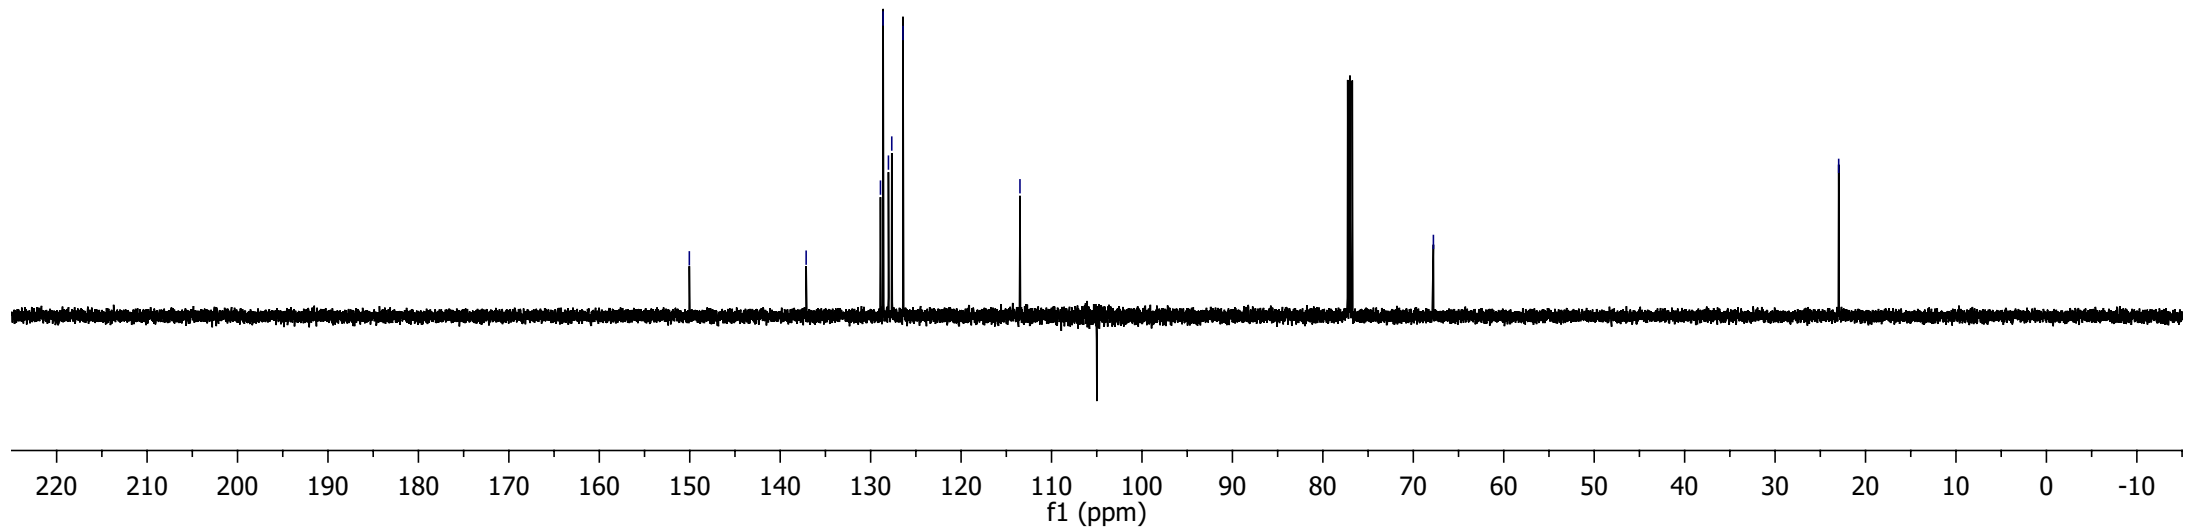

| Parameter                | Value       |
|--------------------------|-------------|
| 1 Title                  | LSR2-99-TM2 |
| 2 Solvent                | CDCl3       |
| 3 Relaxation Delay       | 4.8000      |
| 4 Spectrometer Frequency | 499.86      |

7.45  
7.43  
7.35  
7.34  
7.32  
7.26  
7.25  
7.23  
6.81  
6.78  
6.77  
6.74  
5.33  
5.20  
4.22  
4.20  
1.97  
1.77  
1.75  
1.73  
1.68  
1.66  
1.64  
1.62  
1.60  
1.59  
1.22  
1.17  
1.16  
1.14  
1.13  
1.10  
1.09  
1.07  
1.05  
1.04  
1.02

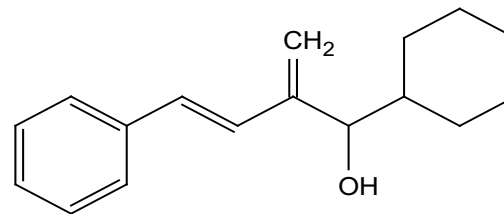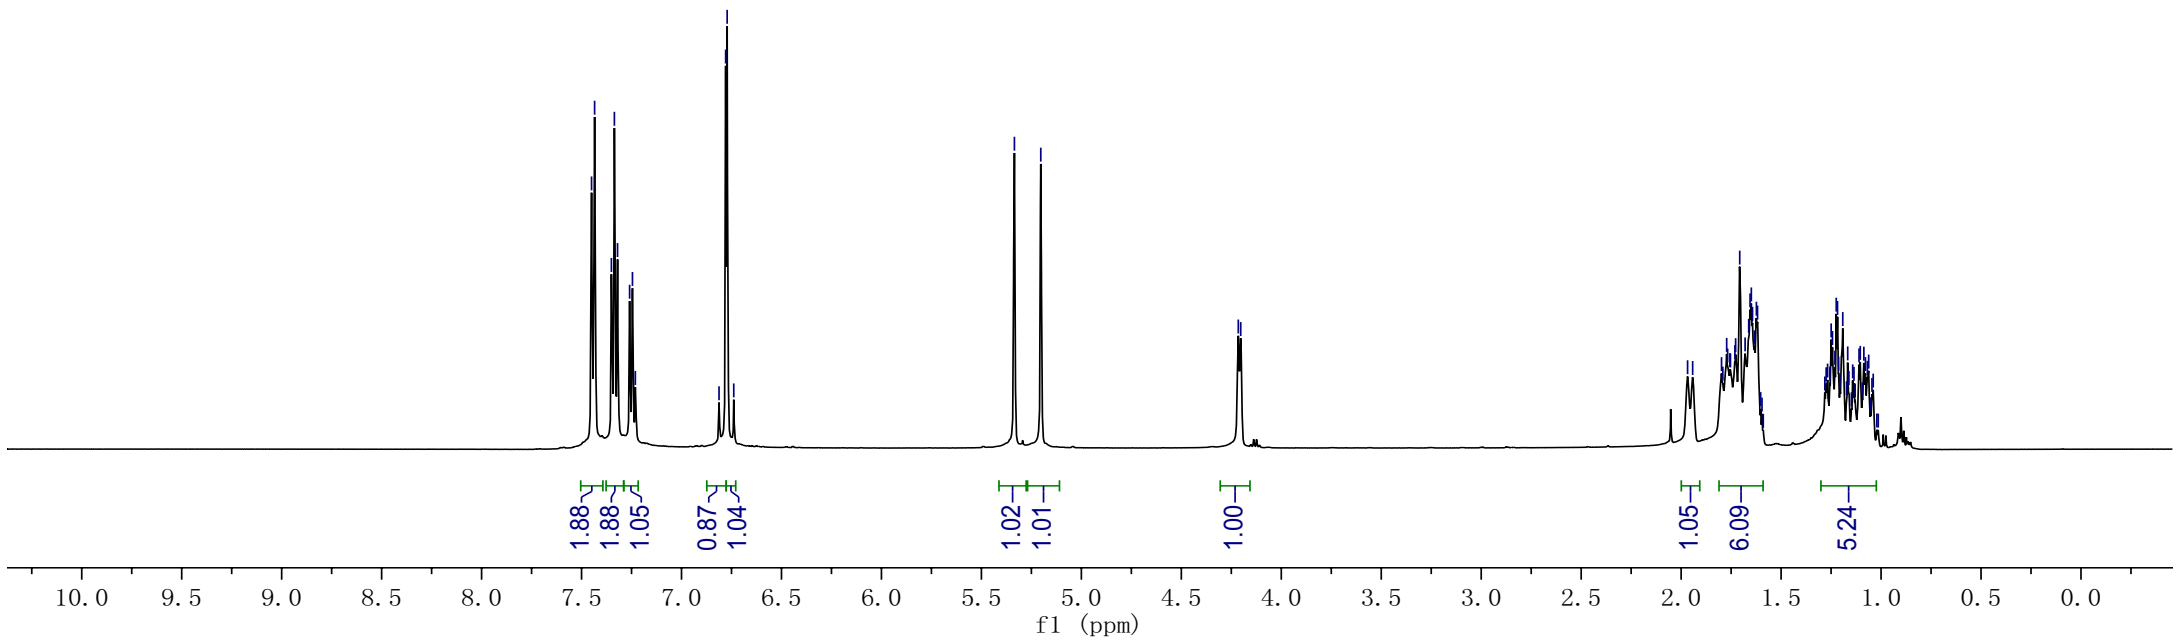

| Parameter                | Value         |
|--------------------------|---------------|
| 1 Title                  | LSR2-99-TM2-C |
| 2 Solvent                | cdcl3         |
| 3 Relaxation Delay       | 1.0000        |
| 4 Spectrometer Frequency | 100.53        |

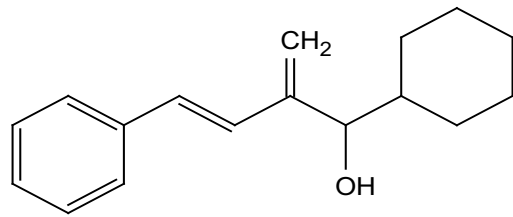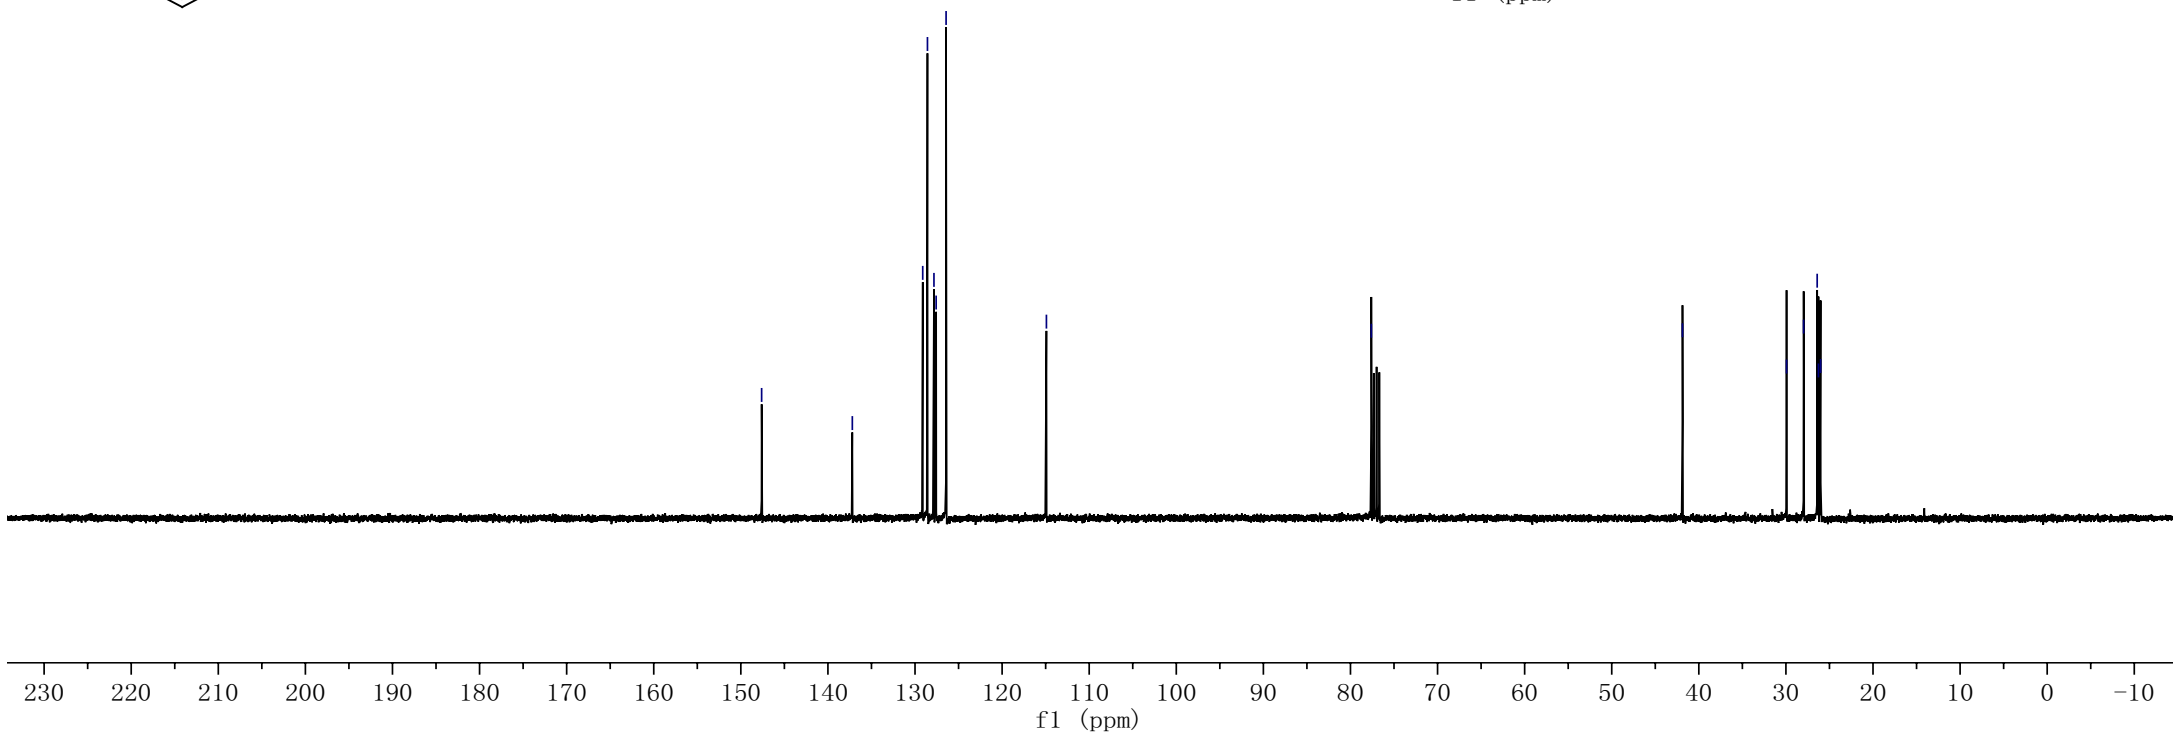

—147.61      —137.20      {128.57  
                                                           {127.82  
                                                           {127.57  
                                                           {126.43      —114.91      —77.61      —41.88  
                                                           {29.93  
                                                           {27.97  
                                                           {26.41  
                                                           {26.26  
                                                           {26.02

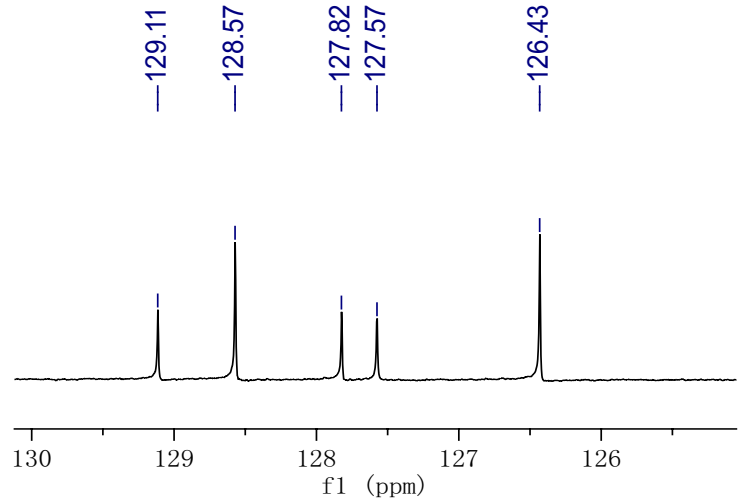



| Parameter                | Value        |
|--------------------------|--------------|
| 1 Title                  | LSR2-130-TM1 |
| 2 Solvent                | cdcl3        |
| 3 Relaxation Delay       | 4.8000       |
| 4 Spectrometer Frequency | 399.78       |

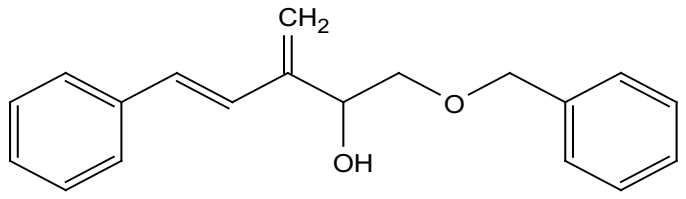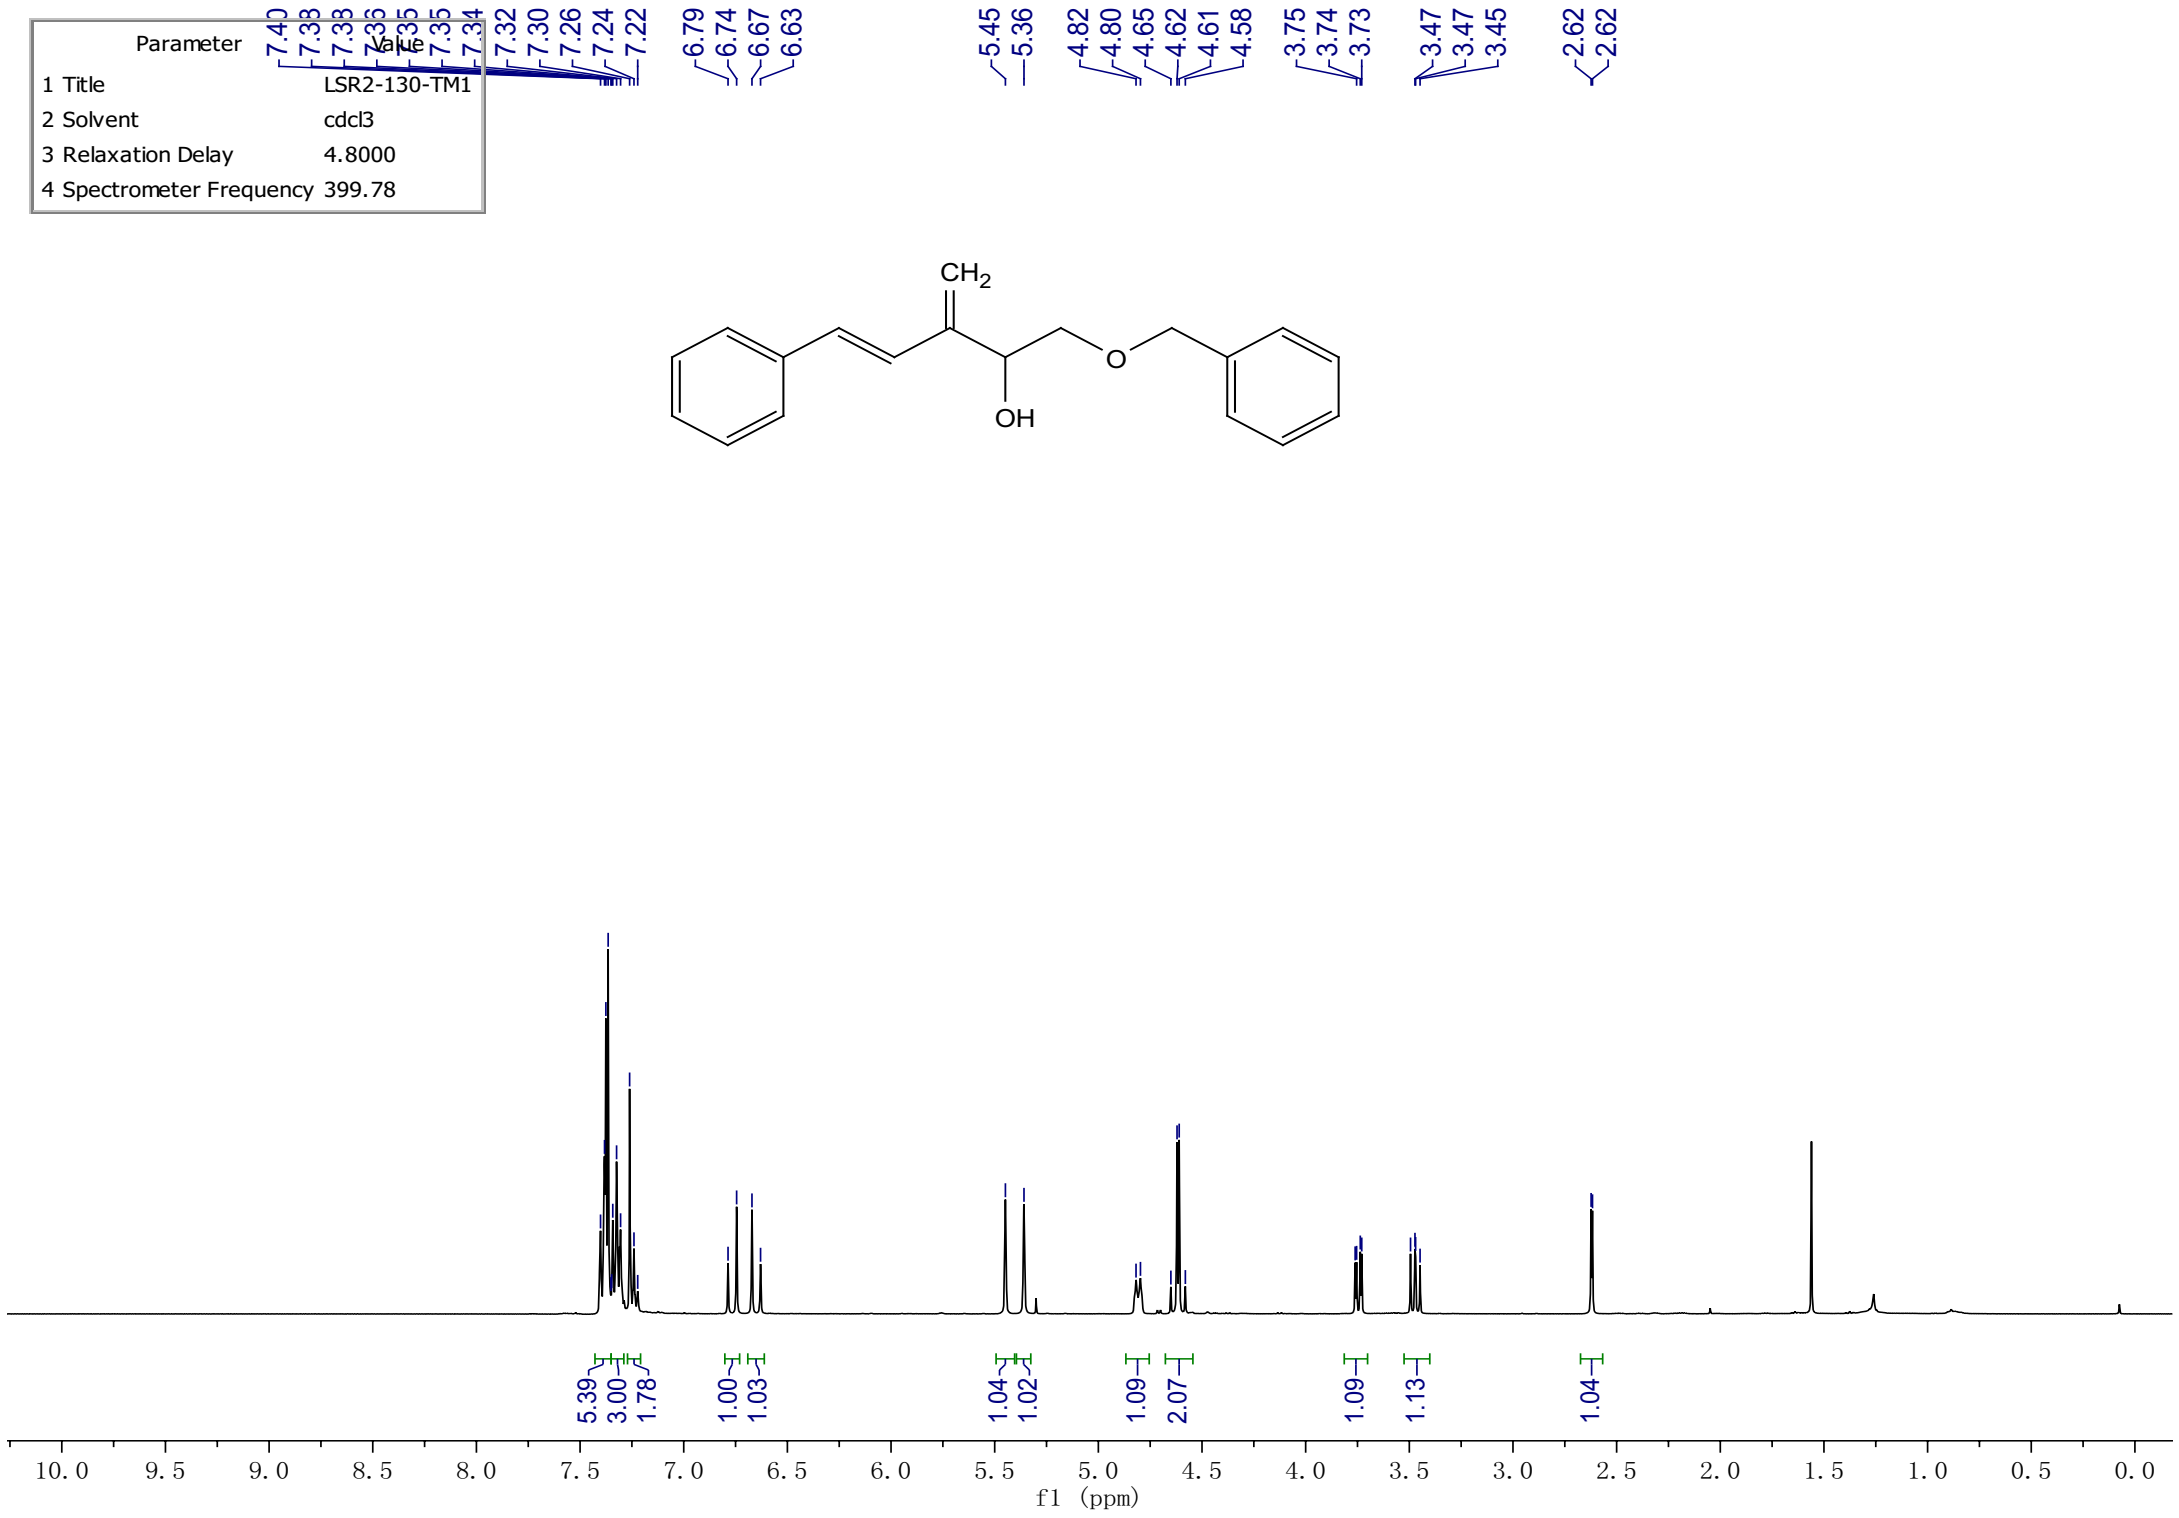

| Parameter                | Value          |
|--------------------------|----------------|
| 1 Title                  | LSR2-106-TM1-C |
| 2 Solvent                | cdcl3          |
| 3 Relaxation Delay       | 1.0000         |
| 4 Spectrometer Frequency | 150.79         |

— 144.49  
 — 137.79  
 — 136.99  
 — 128.54  
 — 128.14  
 — 127.79  
 — 126.42  
 — 116.04  
  
 — 74.34  
 — 73.39  
 — 70.47

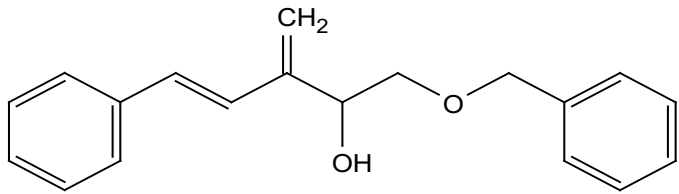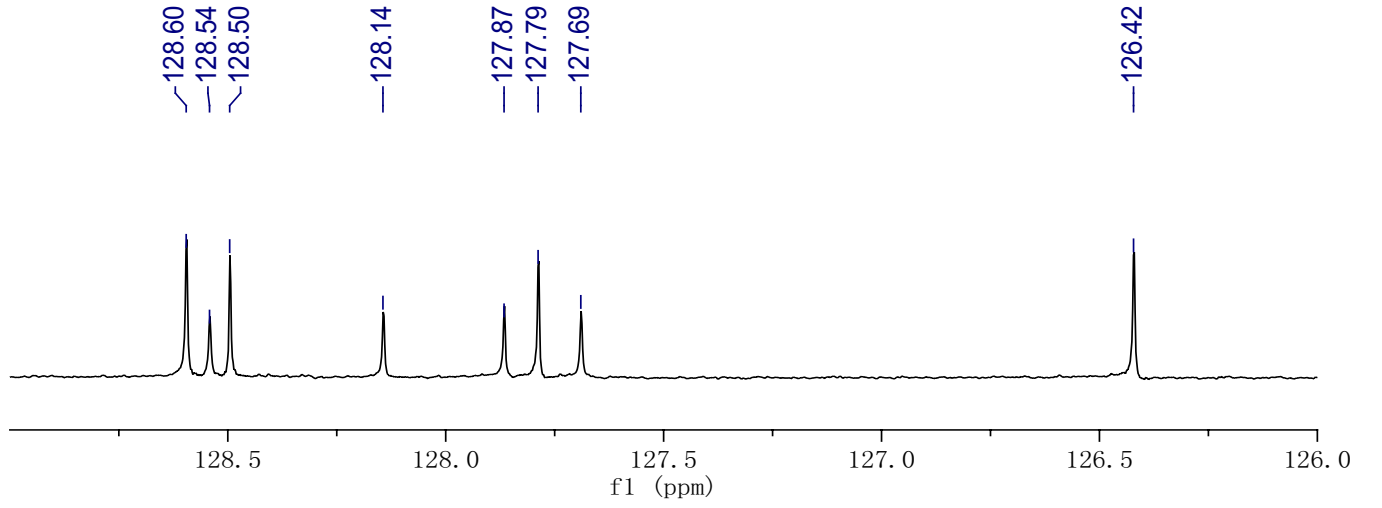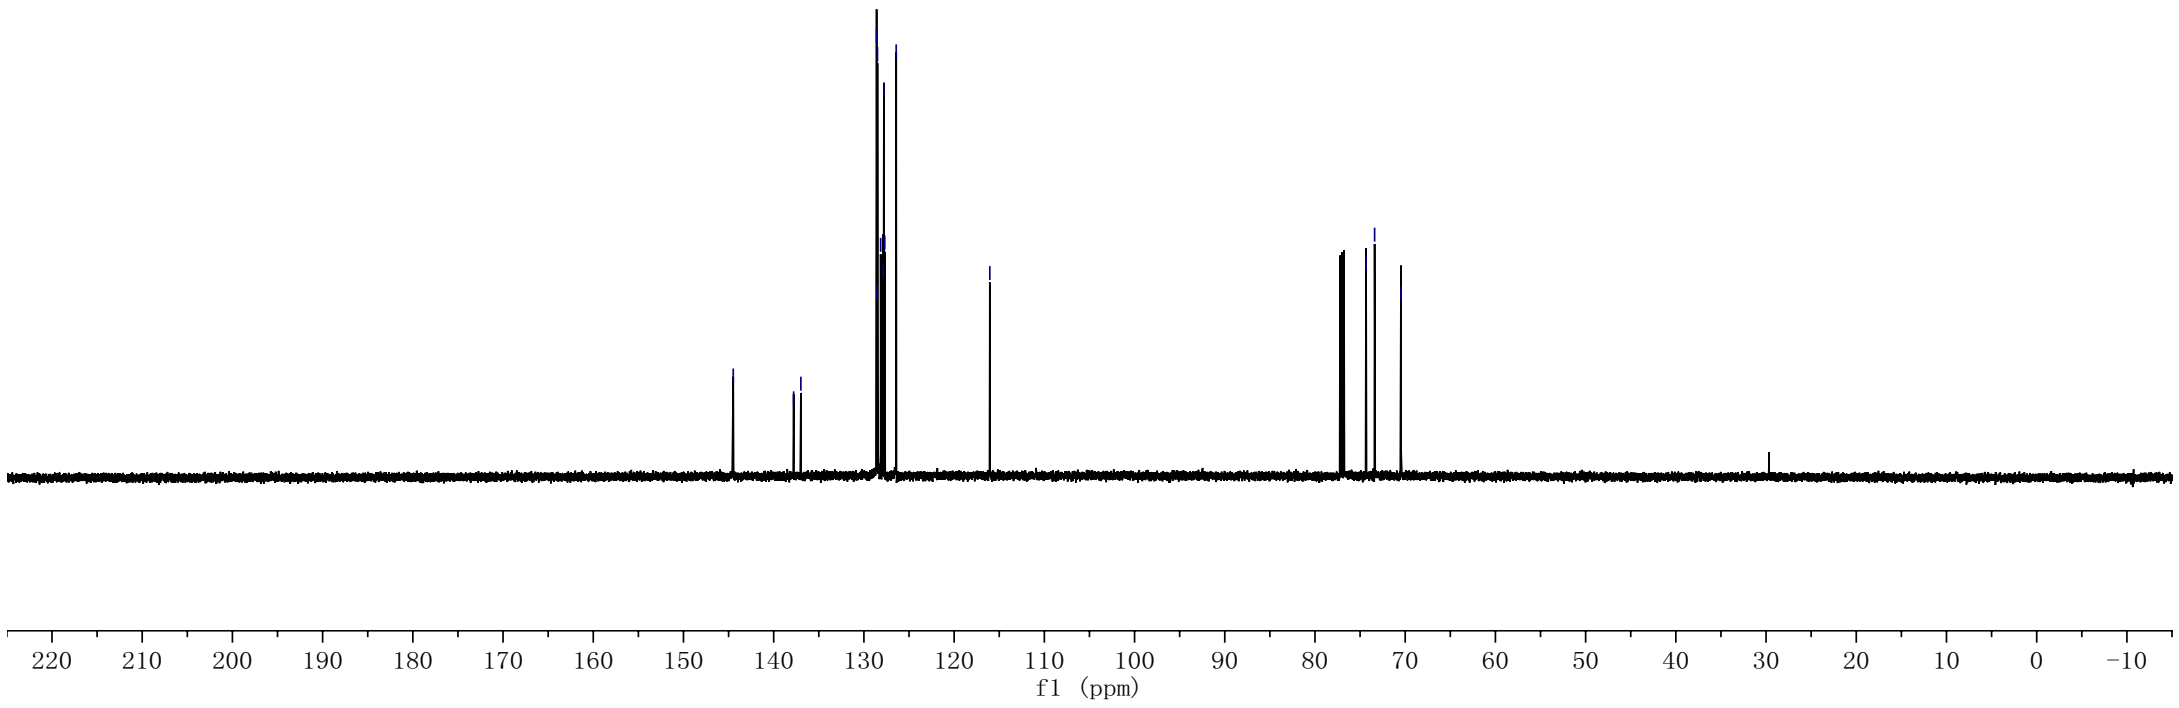

| Parameter                | Value       |
|--------------------------|-------------|
| 1 Title                  | LSR2-124-TM |
| 2 Solvent                | cdcl3       |
| 3 Relaxation Delay       | 4.8000      |
| 4 Spectrometer Frequency | 399.78      |

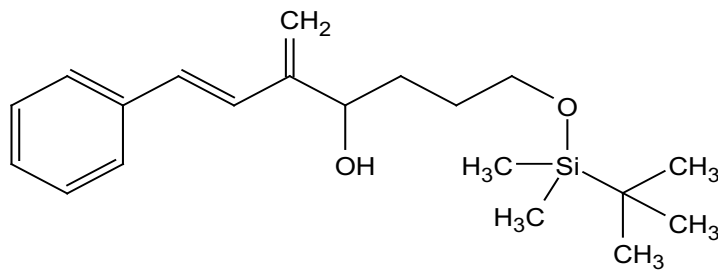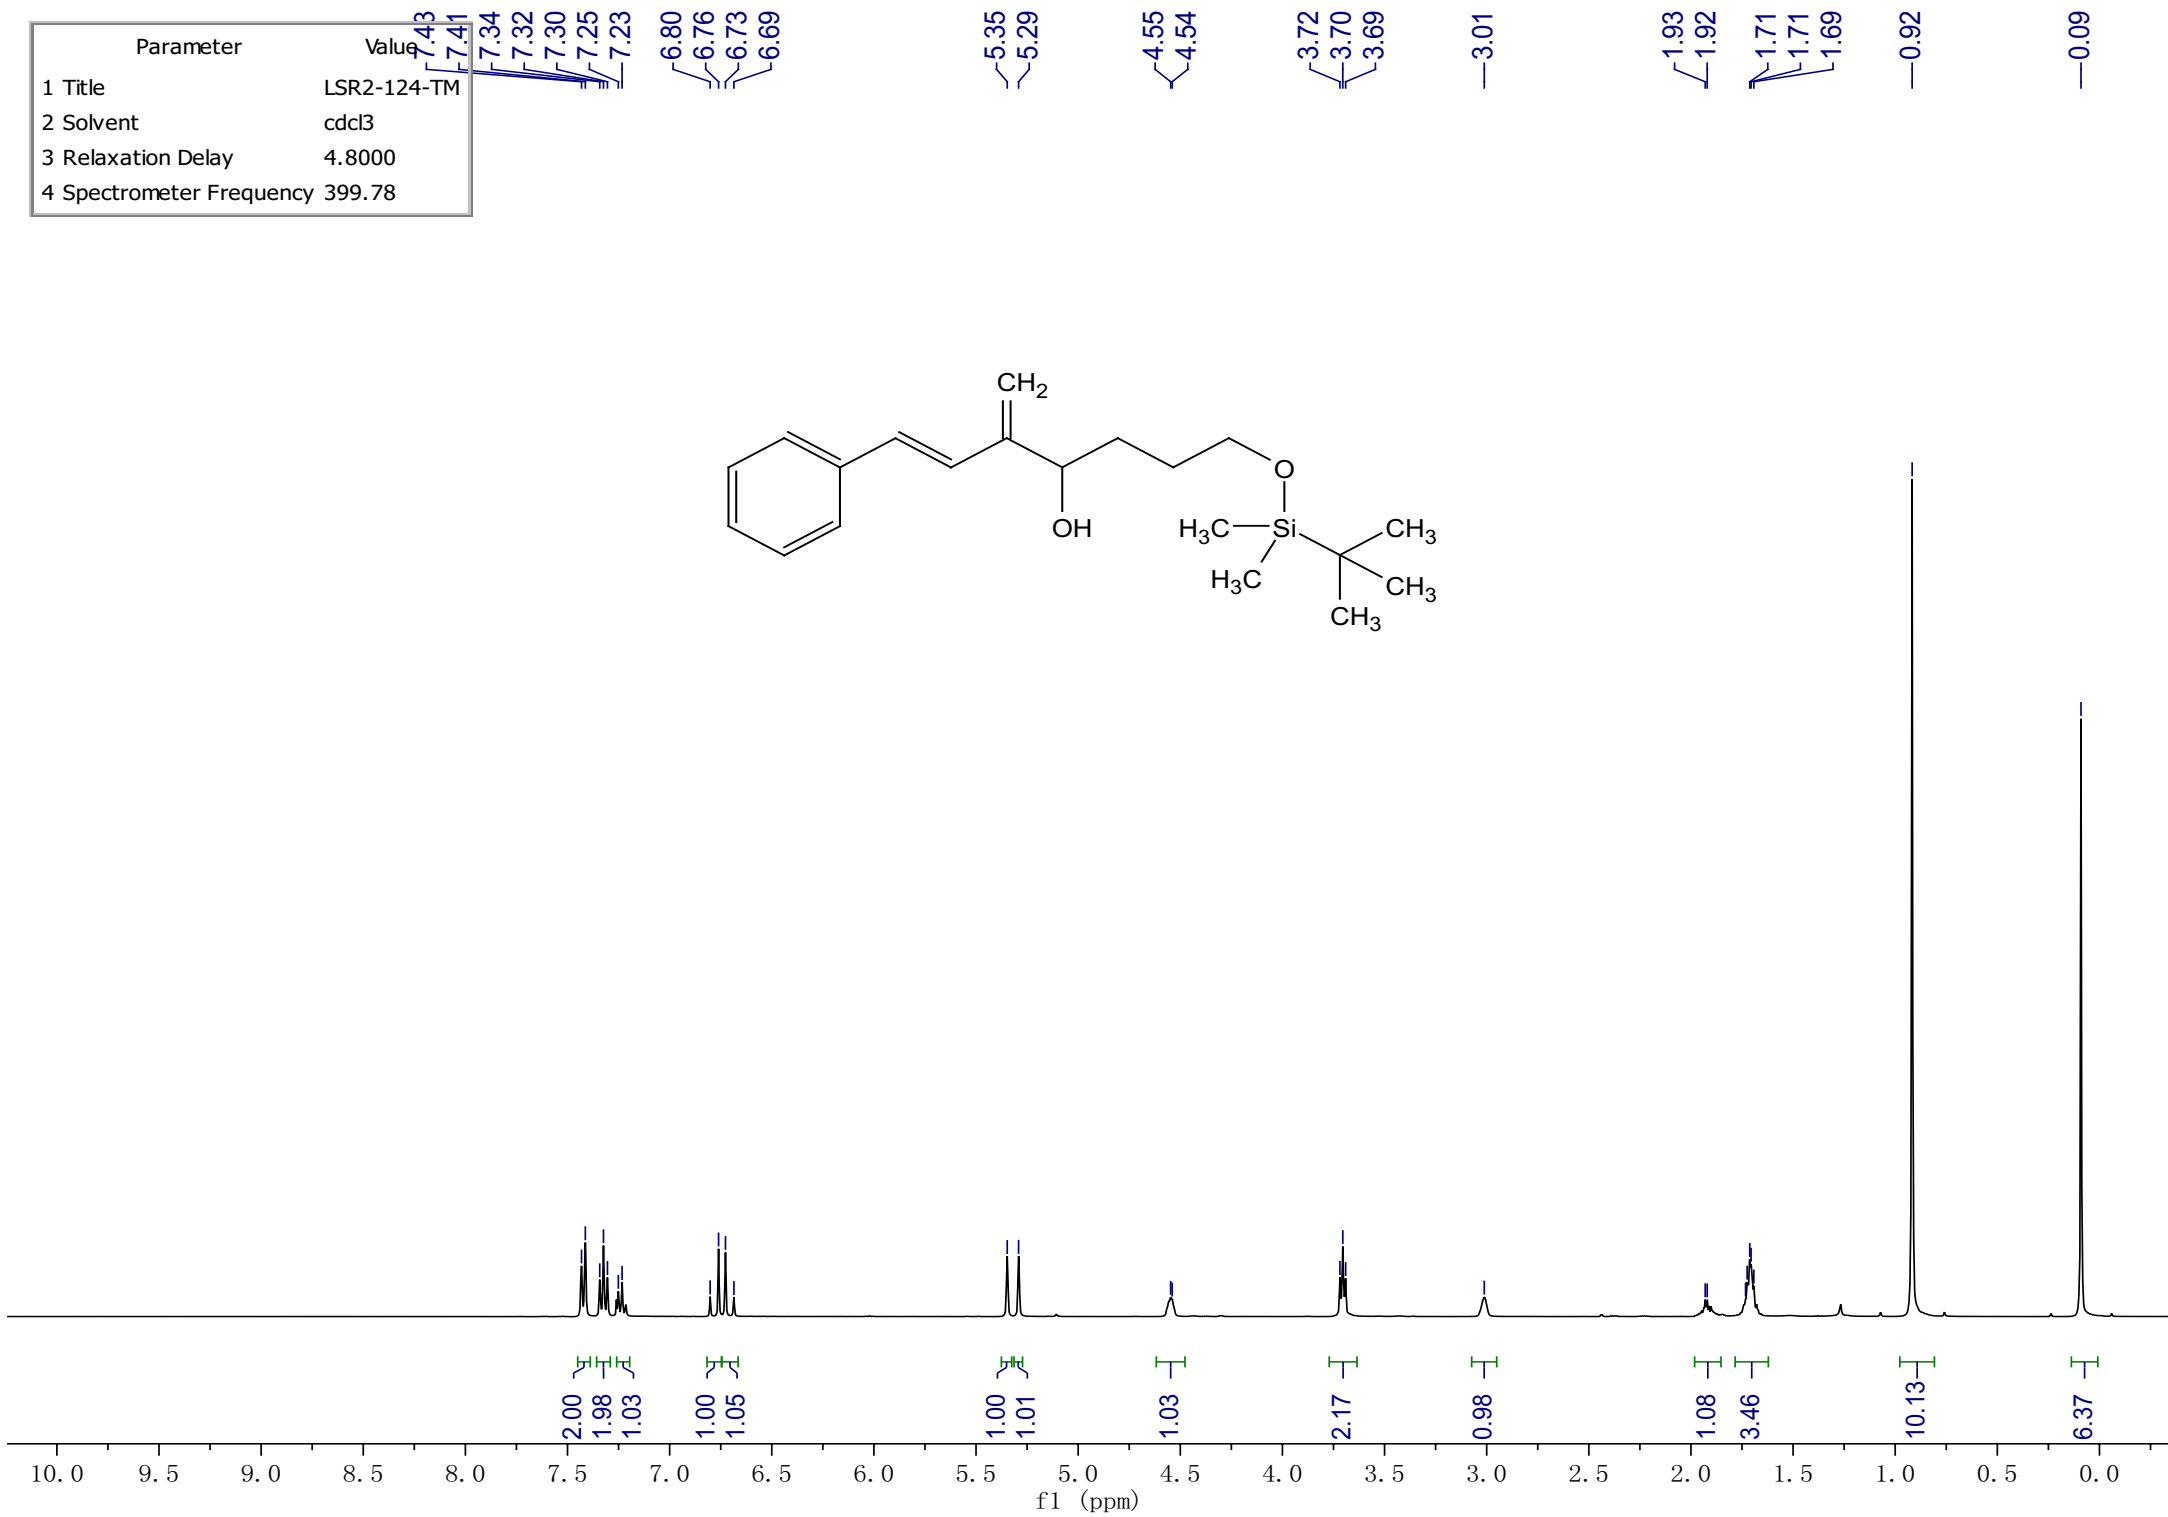



| Parameter                | Value        |
|--------------------------|--------------|
| 1 Title                  | LSR2-158-TM1 |
| 2 Solvent                | cdc13        |
| 3 Relaxation Delay       | 4.8000       |
| 4 Spectrometer Frequency | 399.78       |

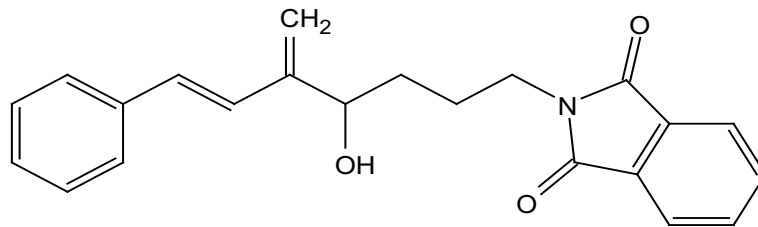

7.81 7.80 7.80 7.79 7.78 7.69 7.68 7.67 7.66 7.65 7.37 7.23 7.20 6.75 6.71 6.67 5.29 5.27 4.59 4.57 3.77 3.75 3.73 2.00 1.89 1.88 1.88 1.87 1.86 1.84 1.83 1.83 1.81 1.80 1.79 1.78 1.77 1.76 1.74 1.73 1.72 1.71 1.70 1.68 1.67 1.66 1.65

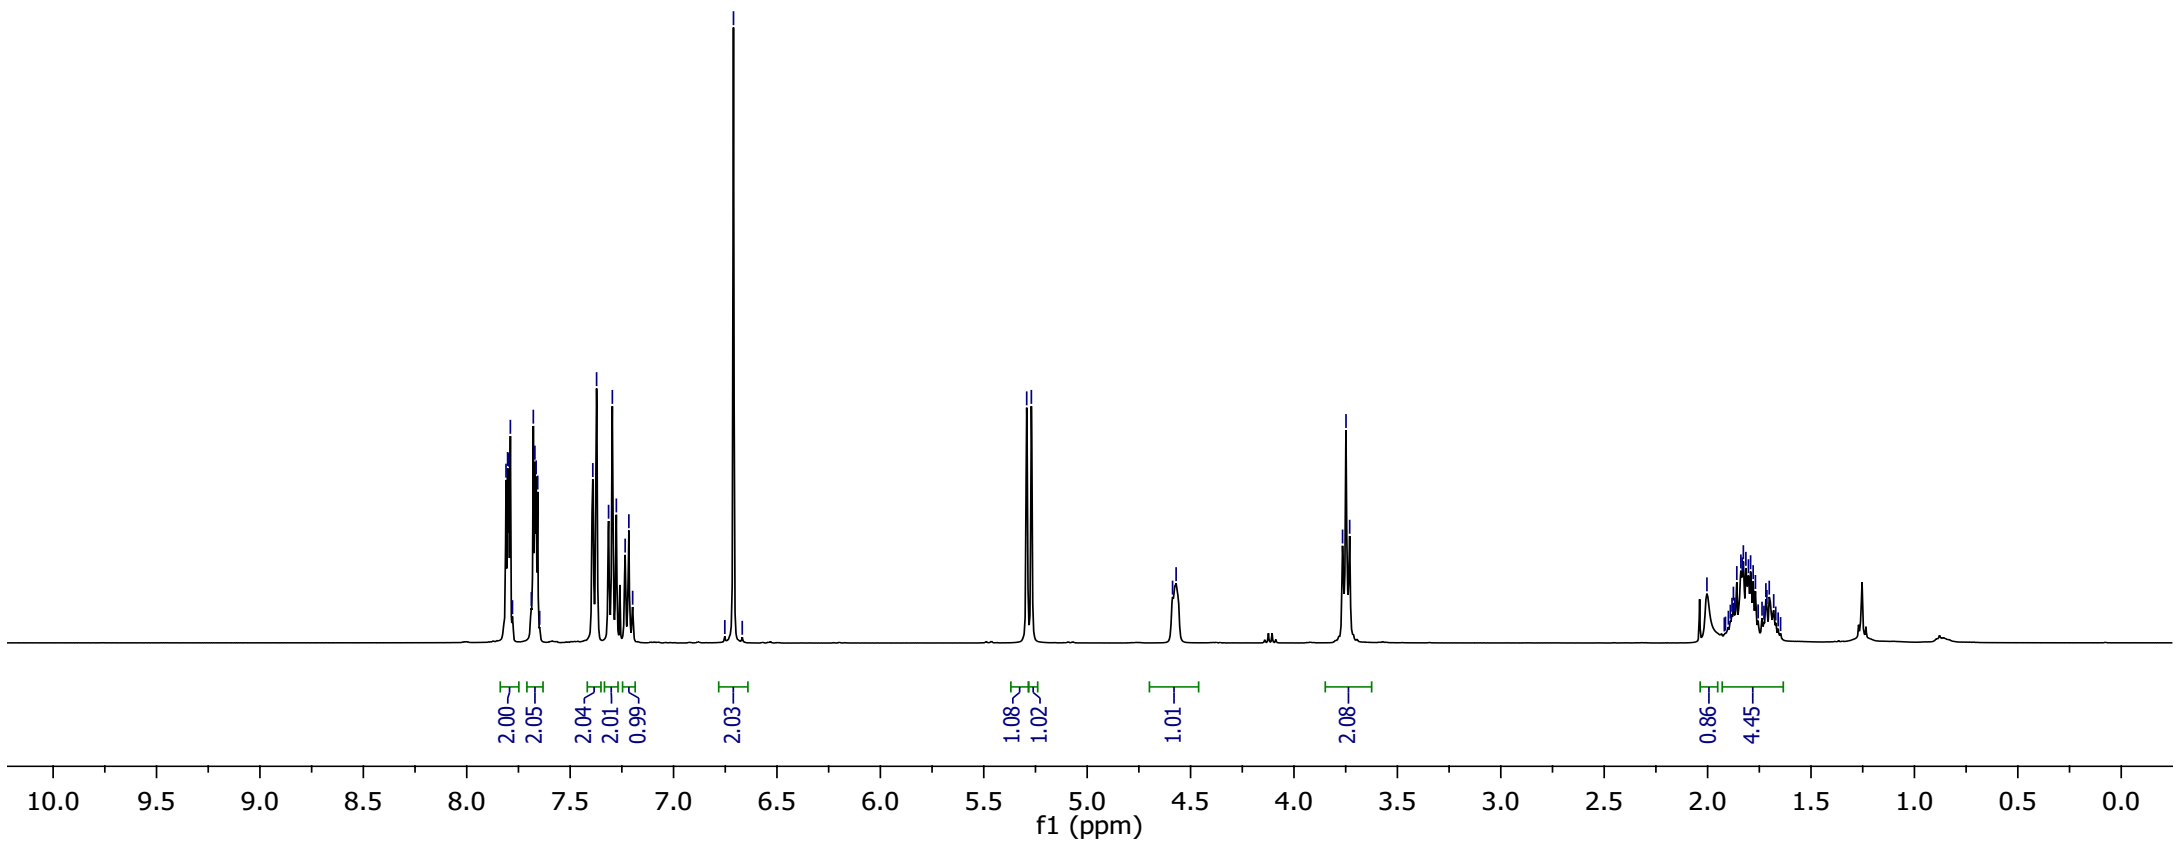

| Parameter                | Value          |
|--------------------------|----------------|
| 1 Title                  | LSR2-158-TM1-C |
| 2 Solvent                | cdc13          |
| 3 Relaxation Delay       | 1.0000         |
| 4 Spectrometer Frequency | 100.53         |

— 168.45      — 148.41      — 137.89      — 127.61      — 126.41      — 123.12      — 114.43  
 — 71.62      — 37.75      — 33.10      — 24.81

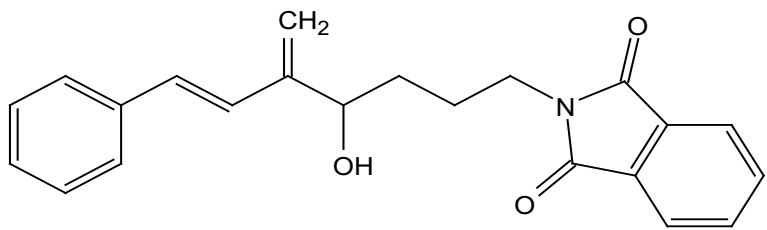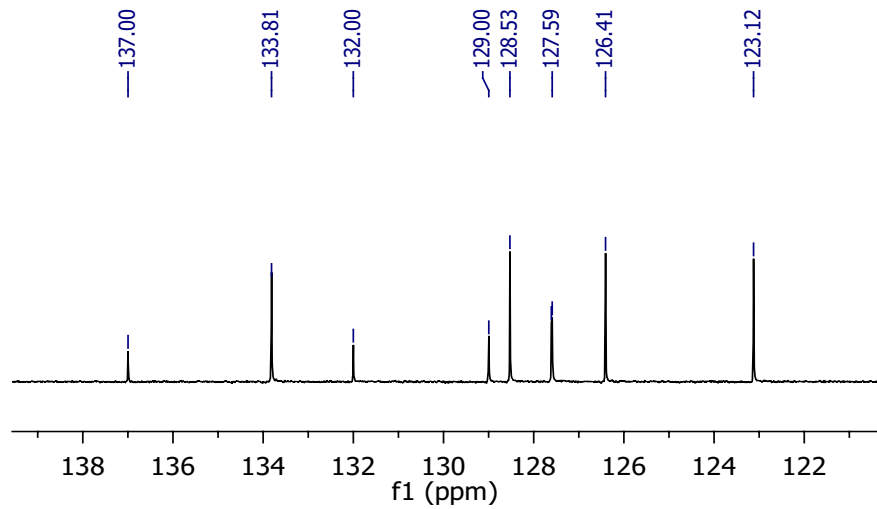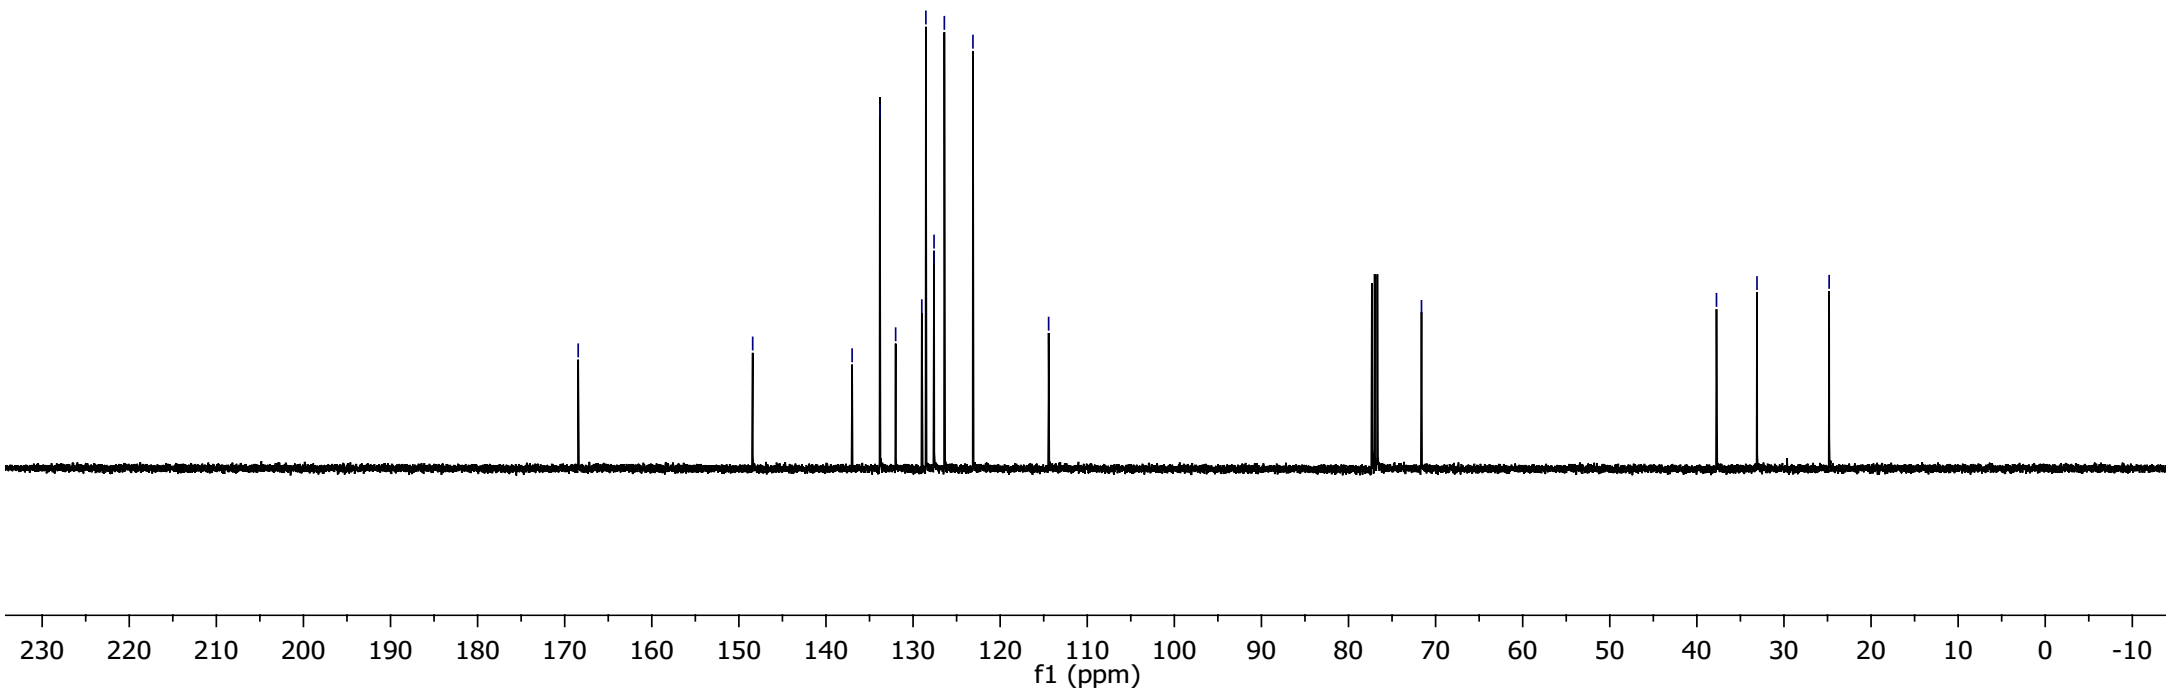

7.37  
7.36  
7.35  
7.35  
7.32  
7.31  
7.31  
7.30  
7.30  
7.30  
7.29  
7.29  
7.28  
7.19  
7.19  
7.19  
7.18  
7.17  
7.17

6.73  
6.70  
6.57  
6.54

5.58  
5.57  
5.48

2.03  
2.02

| Parameter                | Value     |
|--------------------------|-----------|
| 1 Title                  | LSR2-15-4 |
| 2 Solvent                | CDCl3     |
| 3 Relaxation Delay       | 4.8000    |
| 4 Spectrometer Frequency | 499.86    |

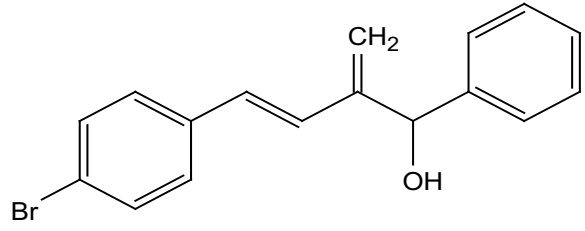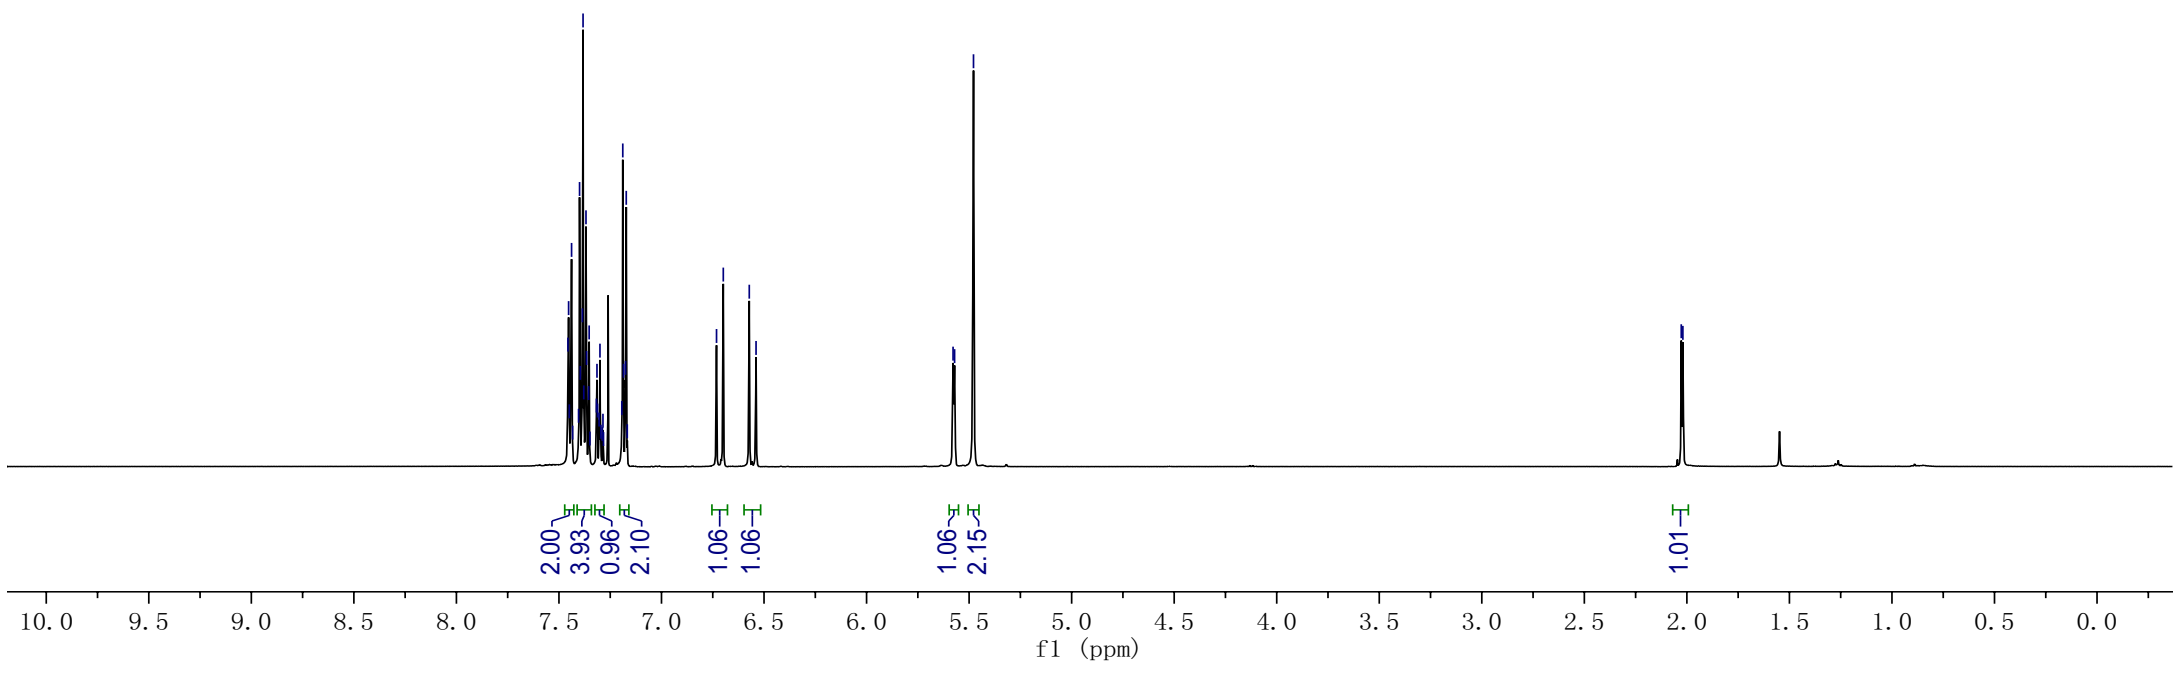

| Parameter                | Value      |
|--------------------------|------------|
| 1 Title                  | LSR2-15-4C |
| 2 Solvent                | CDCl3      |
| 3 Relaxation Delay       | 1.0000     |
| 4 Spectrometer Frequency | 125.70     |

—147.16  
—141.80  
—135.99  
—131.63  
—126.82  
—121.39  
—116.60

—74.43

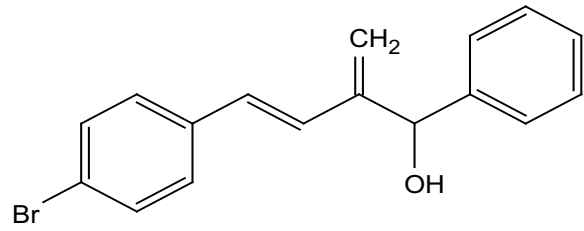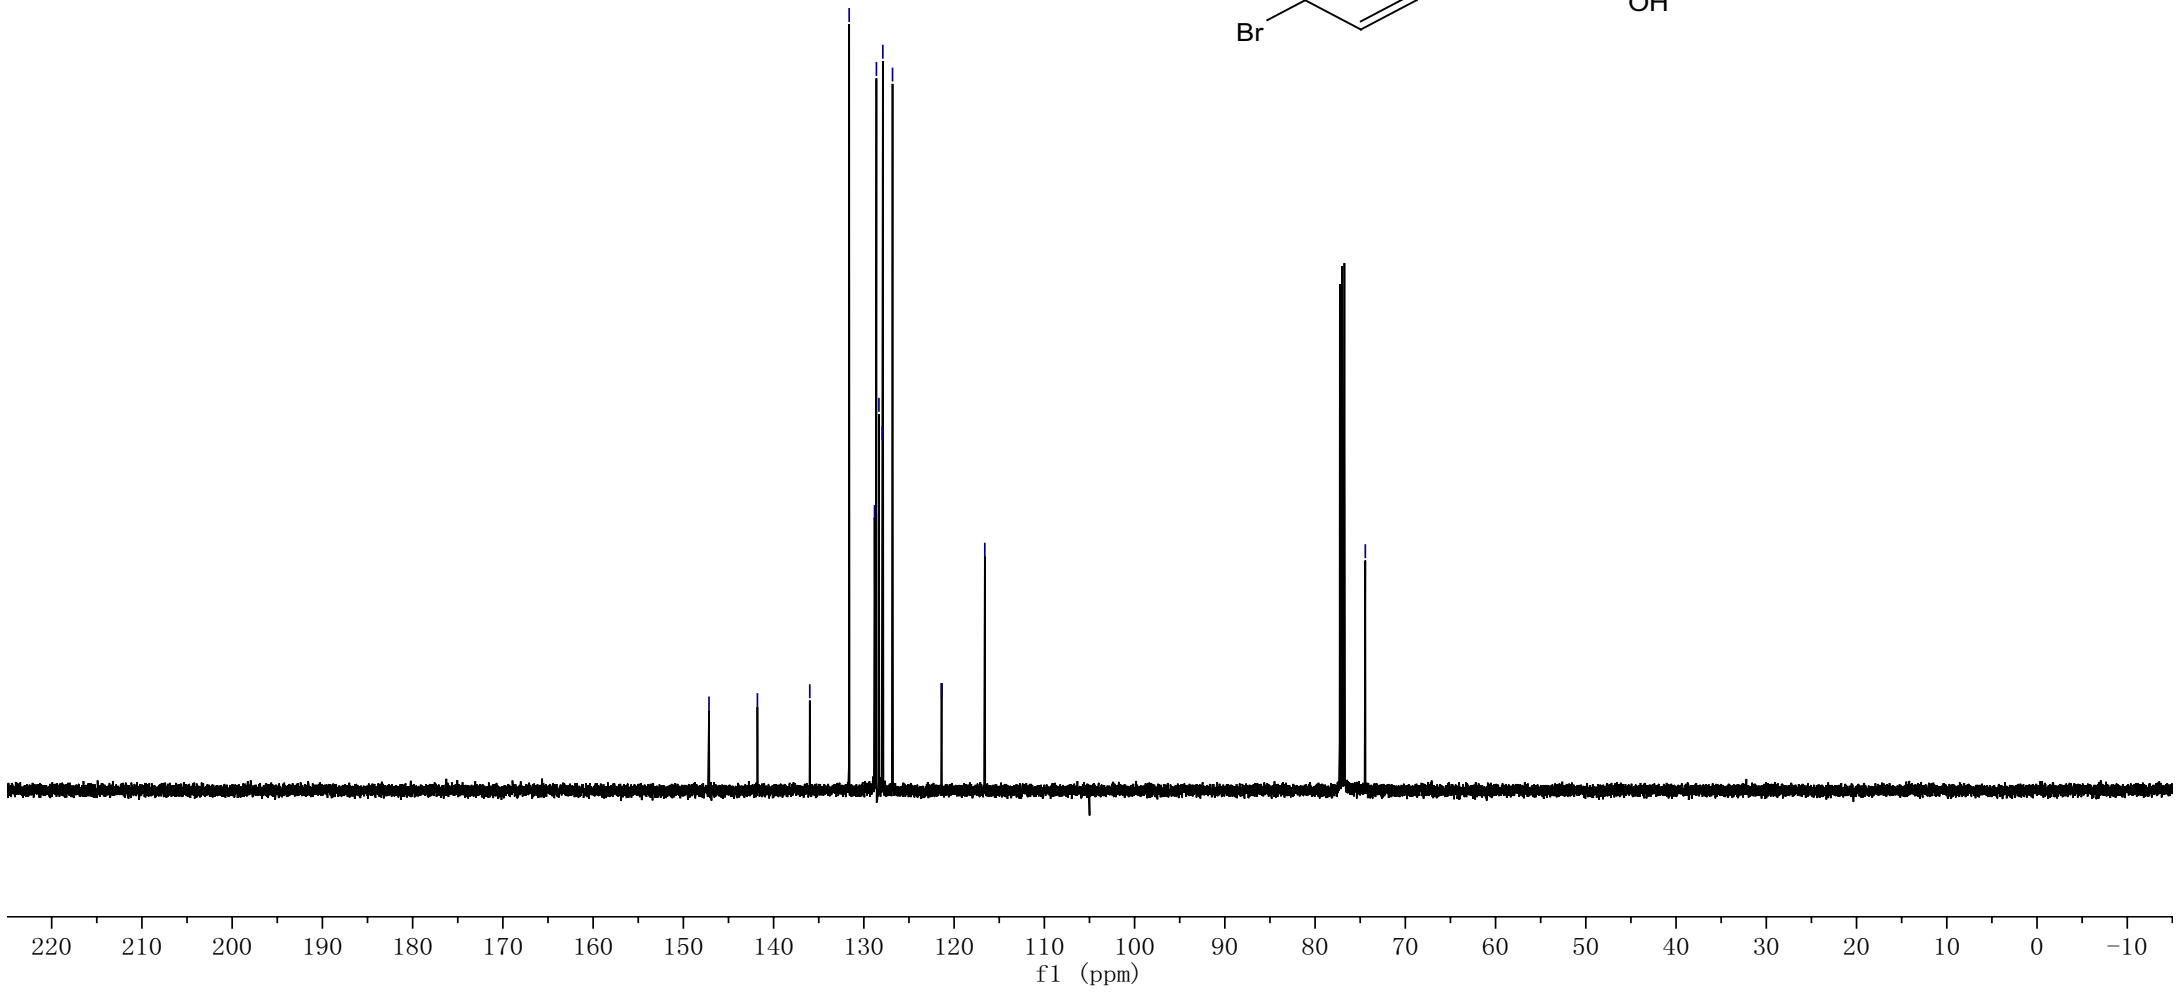



| Parameter                | Value    |
|--------------------------|----------|
| 1 Title                  | LSR2-3-2 |
| 2 Solvent                | CDCl3    |
| 3 Relaxation Delay       | 4.8000   |
| 4 Spectrometer Frequency | 499.86   |

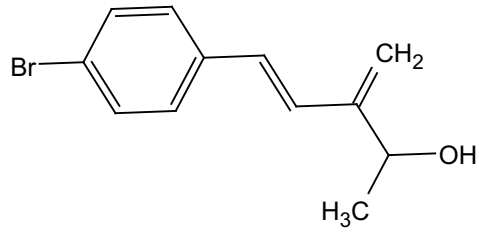

7.45  
7.44  
7.29  
7.27  
6.77  
6.74  
6.68  
6.64

5.37  
5.26  
4.72  
4.71  
4.70  
4.68

1.81  
1.44  
1.43

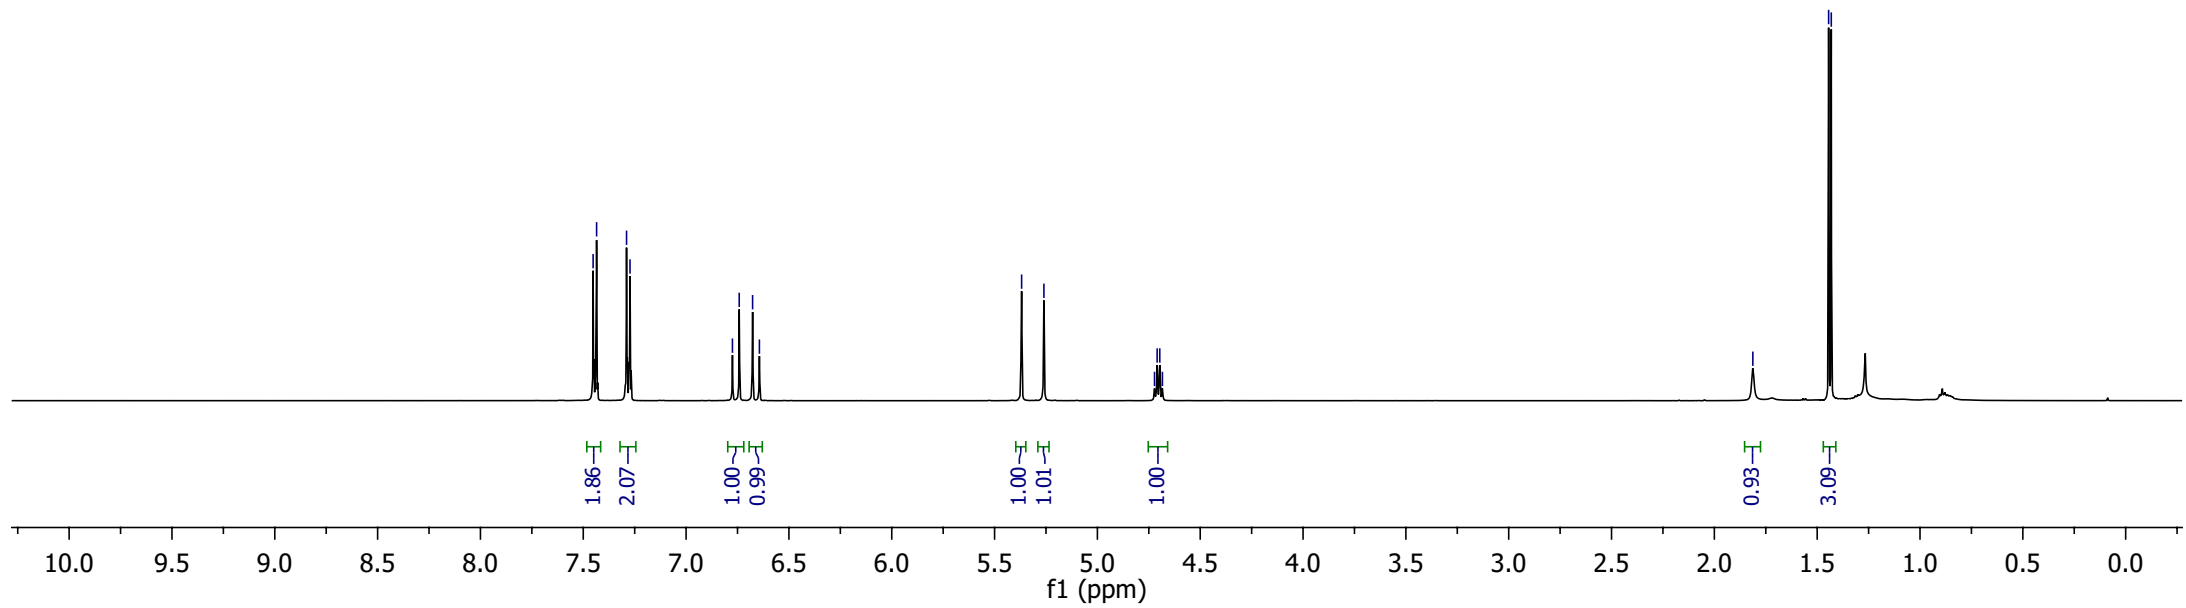

| Parameter                | Value     |
|--------------------------|-----------|
| 1 Title                  | LSR2-3-2C |
| 2 Solvent                | CDCl3     |
| 3 Relaxation Delay       | 1.0000    |
| 4 Spectrometer Frequency | 125.70    |

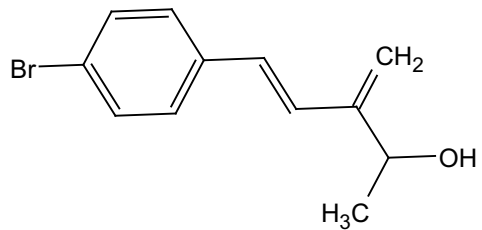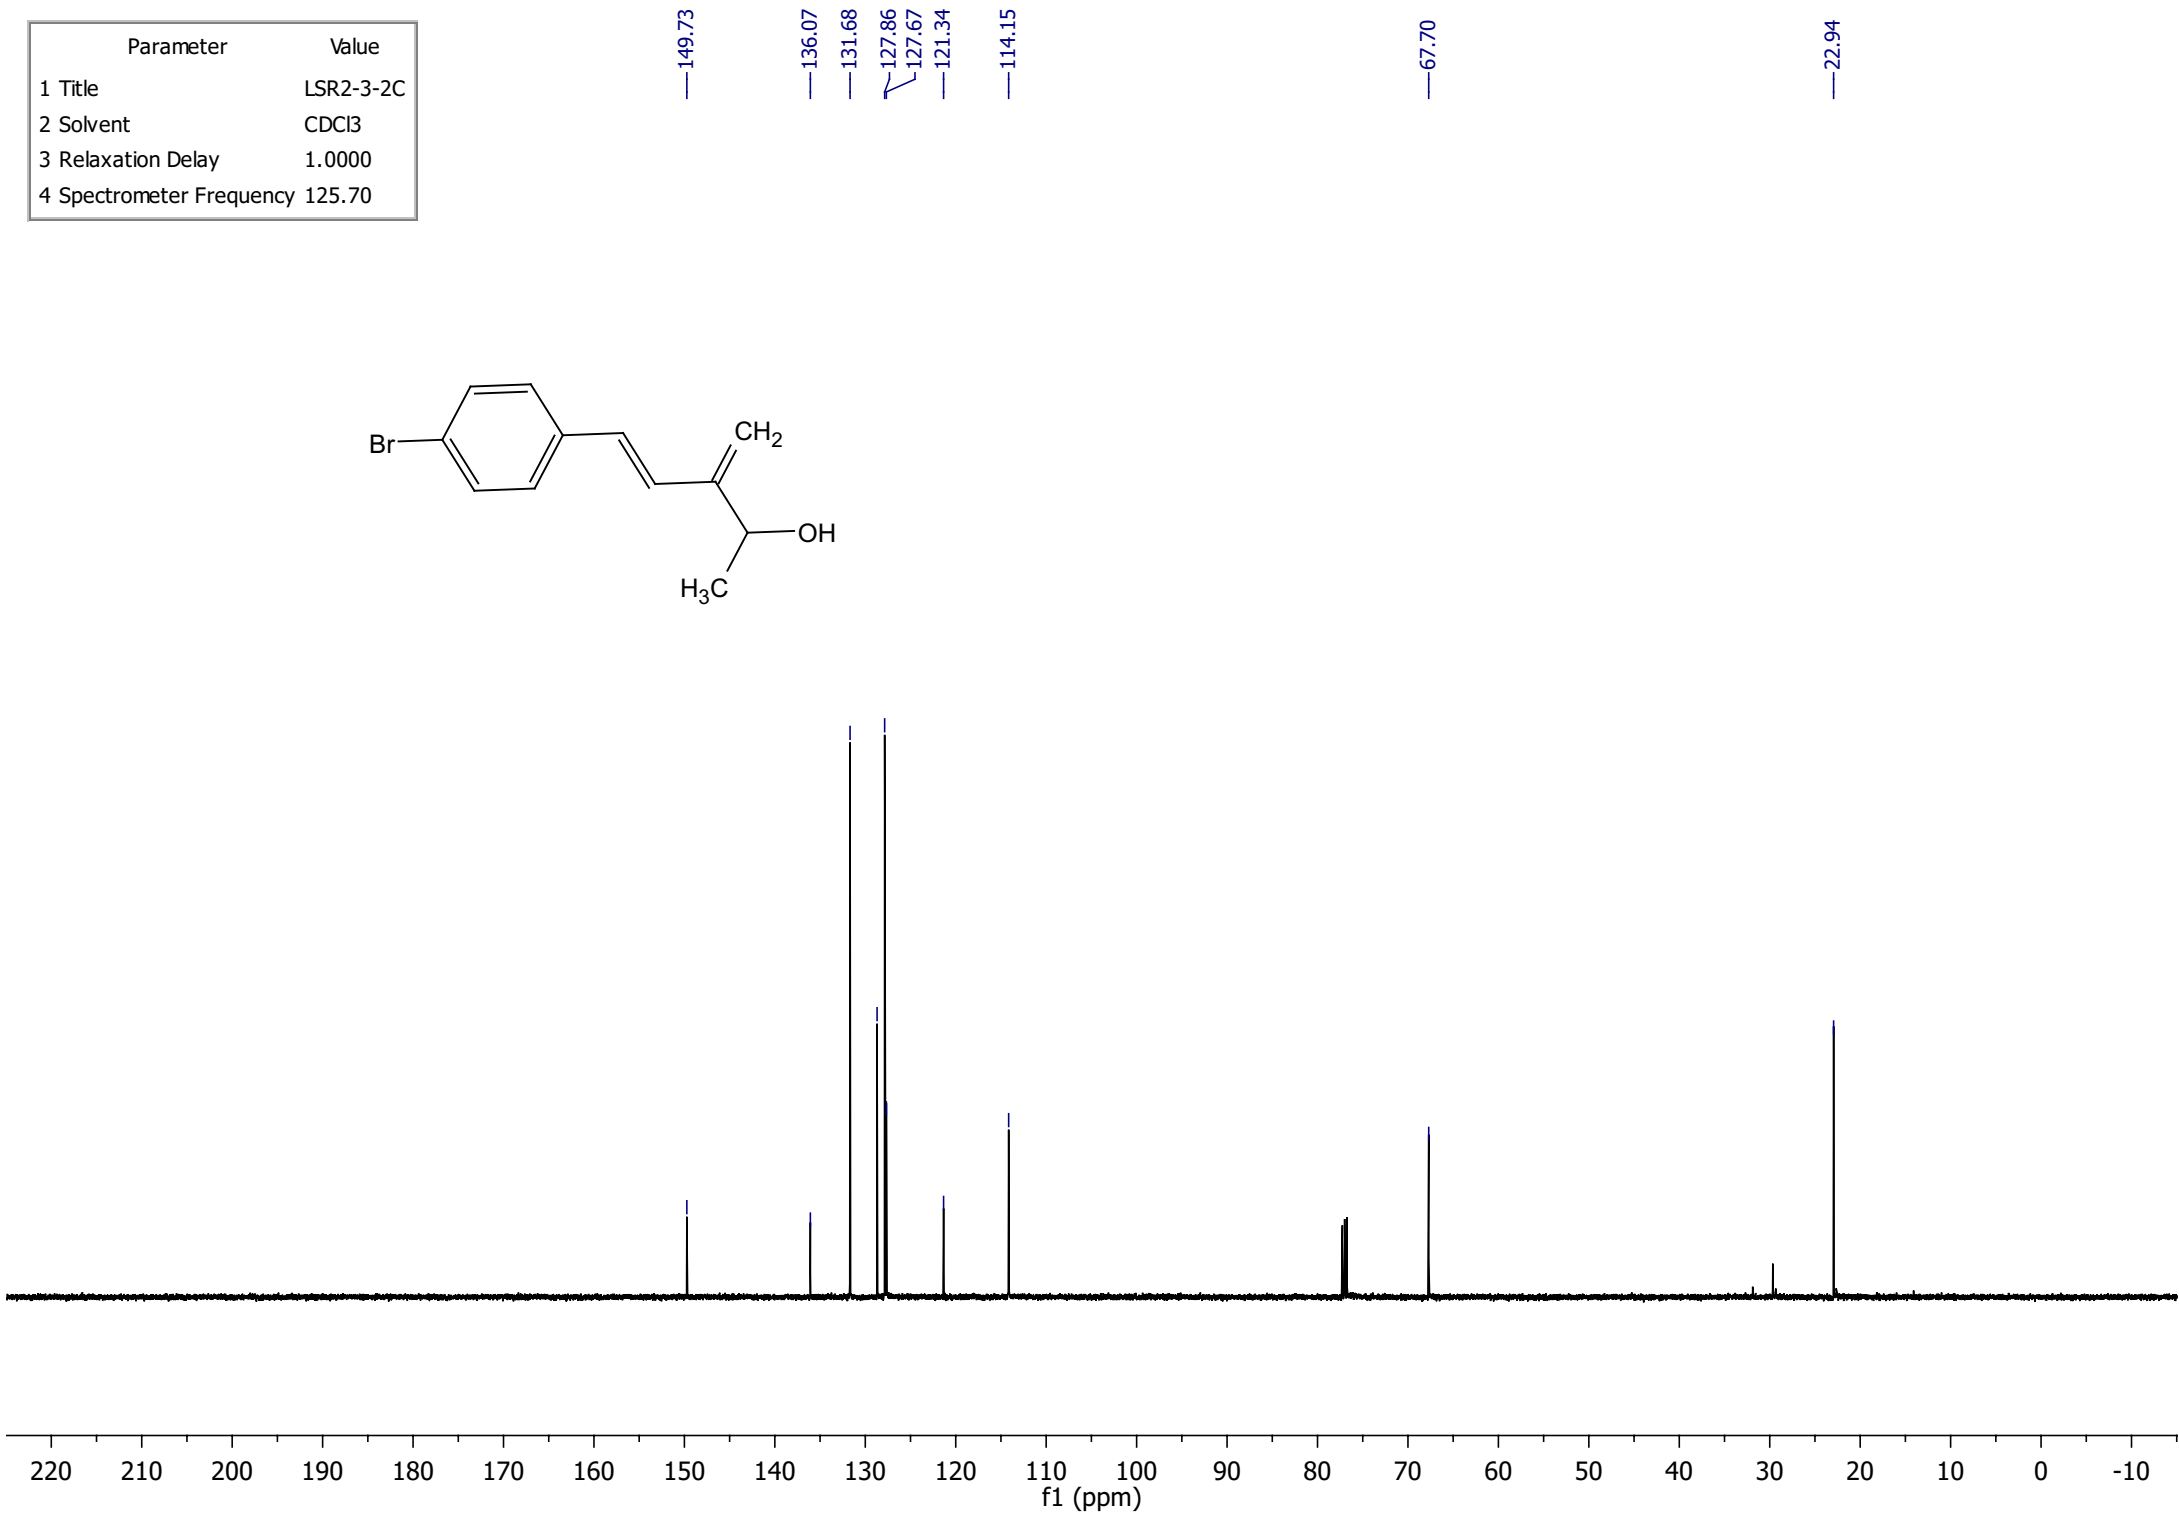

| Parameter                | Value       |
|--------------------------|-------------|
| 1 Title                  | LSR2-66-TM1 |
| 2 Solvent                | CDCl3       |
| 3 Relaxation Delay       | 4.8000      |
| 4 Spectrometer Frequency | 499.86      |

7.355  
7.338  
7.296  
7.279  
7.260

6.751  
6.718  
6.707  
6.674

5.305  
5.280

4.505

1.659  
1.641  
1.613  
1.550  
1.531  
1.509  
1.489  
1.469  
1.439  
1.411  
1.386  
1.358

0.980  
0.965  
0.950

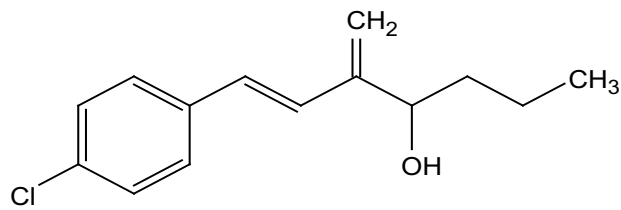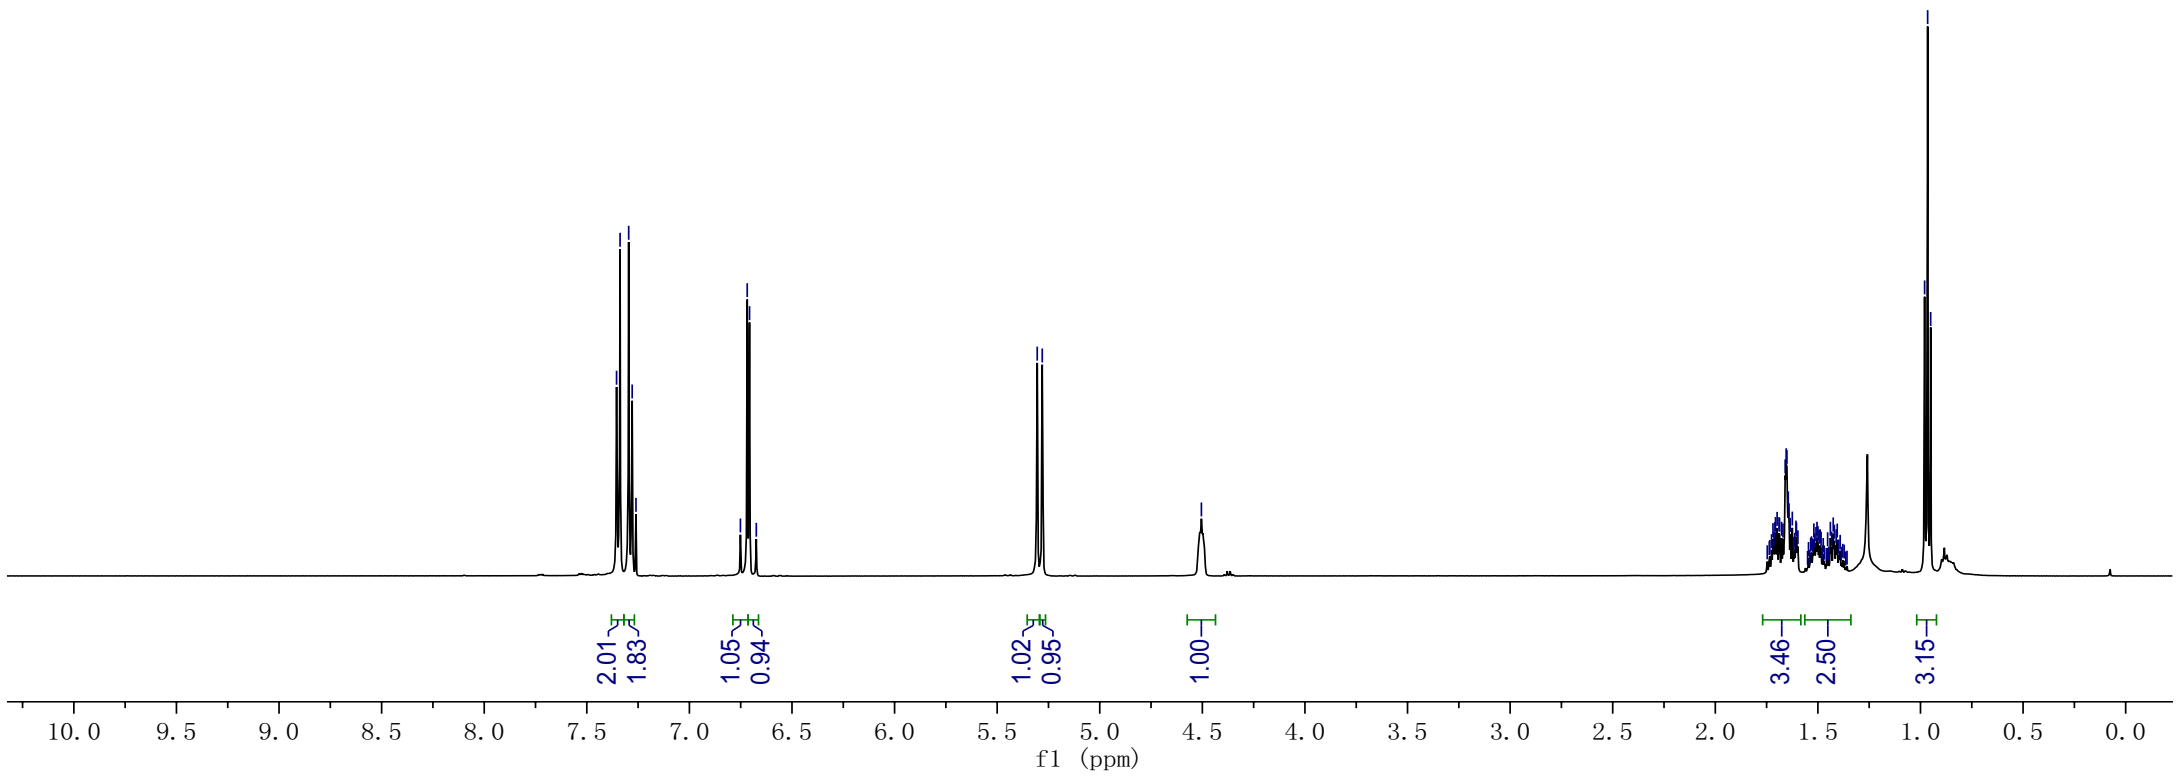

| Parameter                | Value         |
|--------------------------|---------------|
| 1 Title                  | LSR2-66-TM1-C |
| 2 Solvent                | CDCl3         |
| 3 Relaxation Delay       | 1.0000        |
| 4 Spectrometer Frequency | 125.70        |

—148.74

135.70

133.78

127.69

127.59

—114.63

—72.10

—38.58

—19.05

—13.97

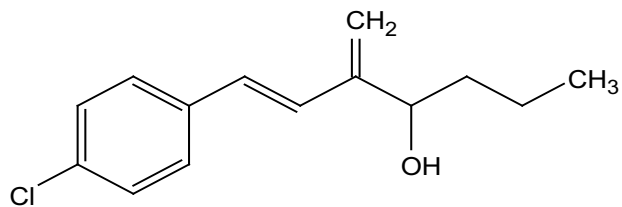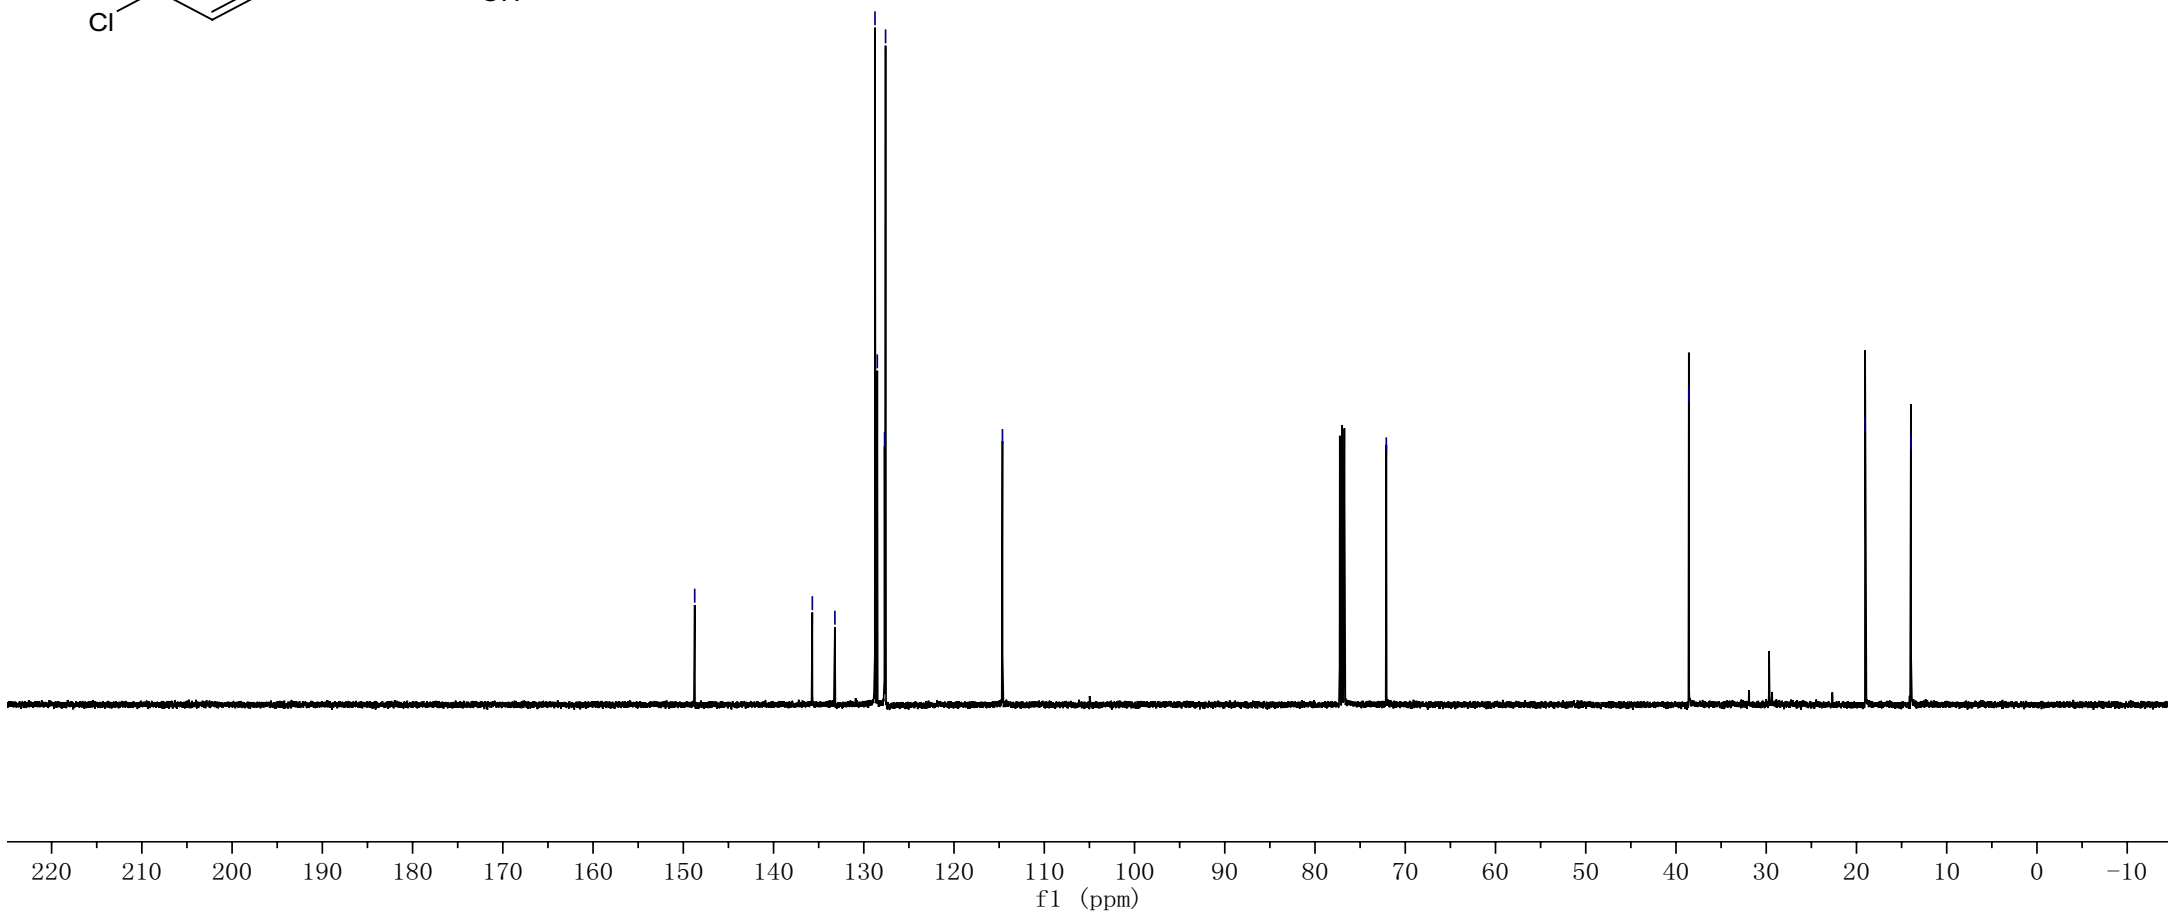

| Parameter                | Value       |
|--------------------------|-------------|
| 1 Title                  | LSR2-98-TM2 |
| 2 Solvent                | CDCl3       |
| 3 Relaxation Delay       | 4.8000      |
| 4 Spectrometer Frequency | 499.86      |

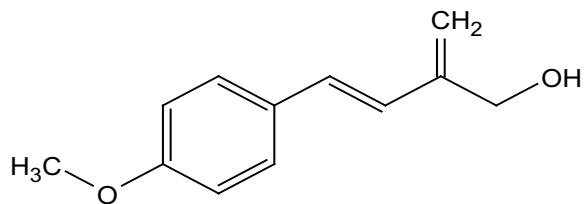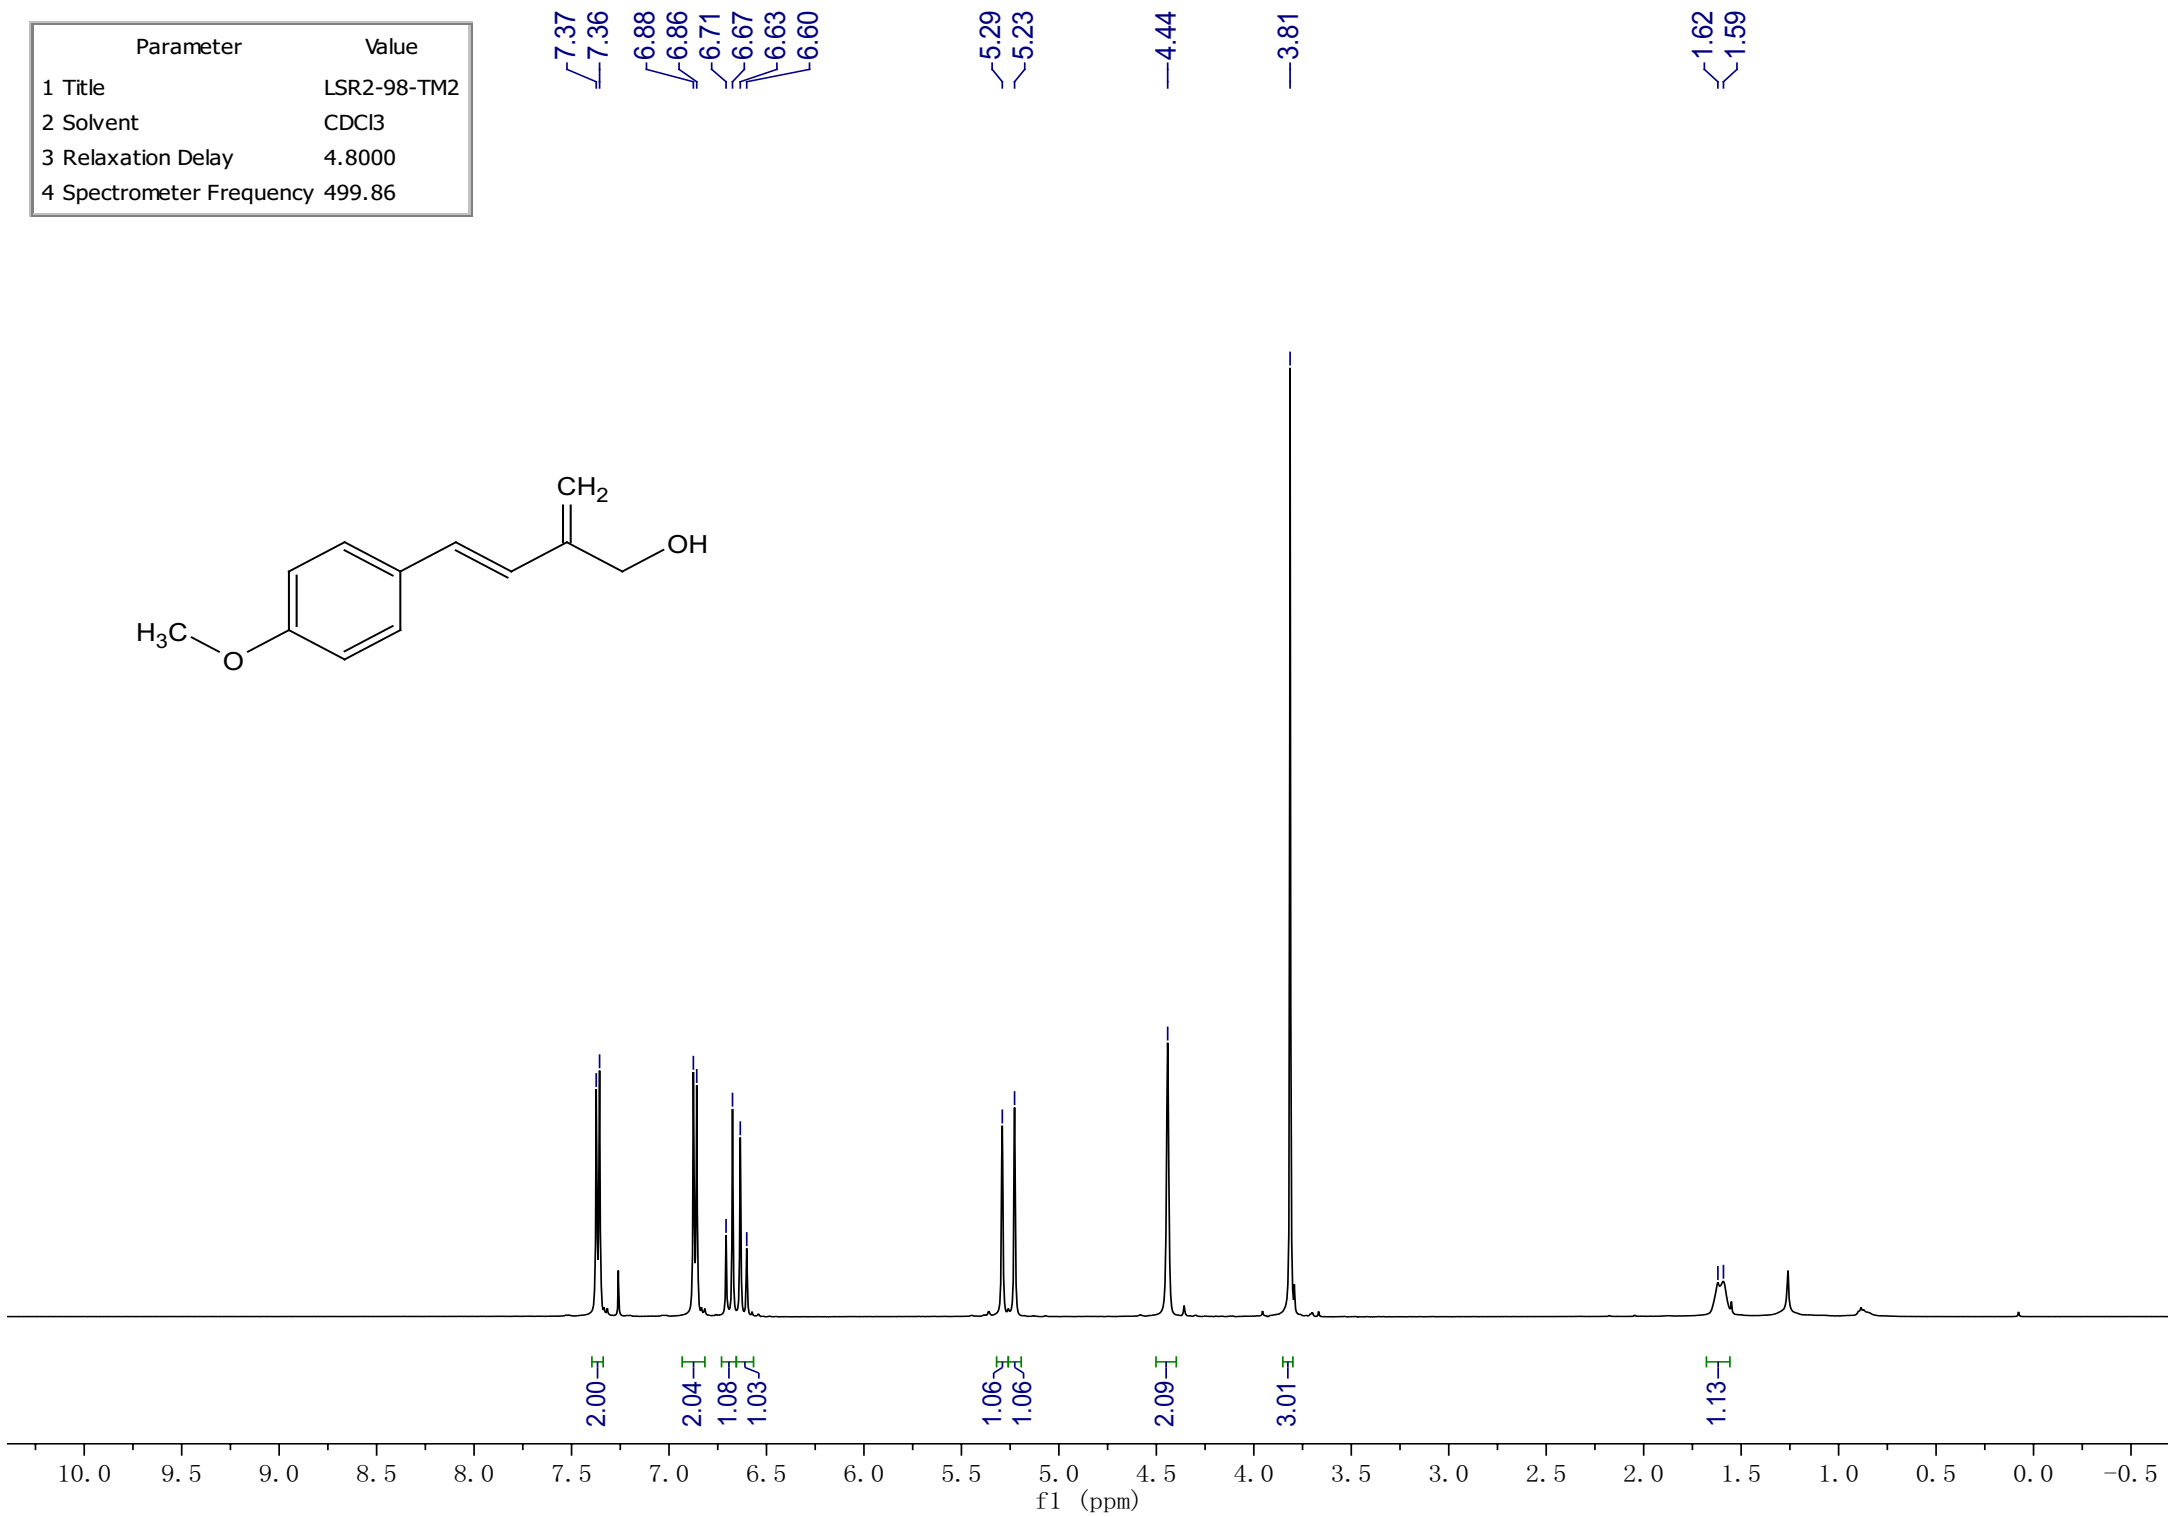

| Parameter                | Value        |
|--------------------------|--------------|
| 1 Title                  | LSR2-98-TM-C |
| 2 Solvent                | cdcl3        |
| 3 Relaxation Delay       | 1.0000       |
| 4 Spectrometer Frequency | 100.53       |

—159.29

—145.14

129.74

128.28

127.64

126.08

115.19

114.04

—63.26

—55.27

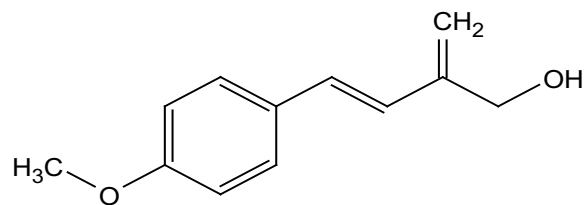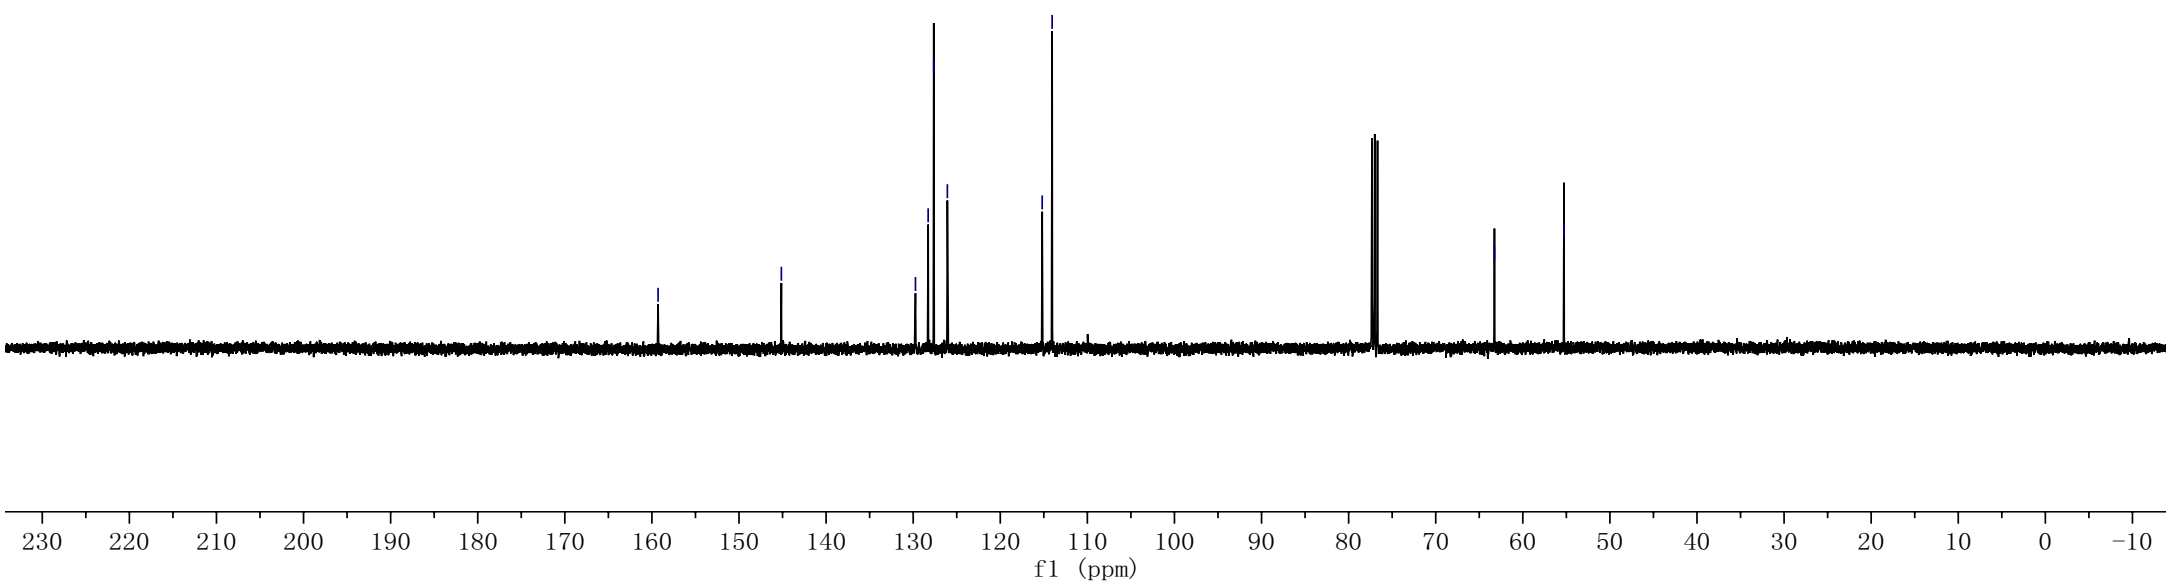

| Parameter                | Value        |
|--------------------------|--------------|
| 1 Title                  | LSR2-109-TM1 |
| 2 Solvent                | cdcl3        |
| 3 Relaxation Delay       | 4.8000       |
| 4 Spectrometer Frequency | 399.78       |

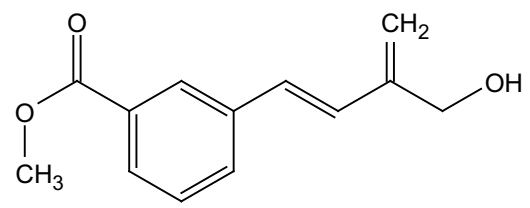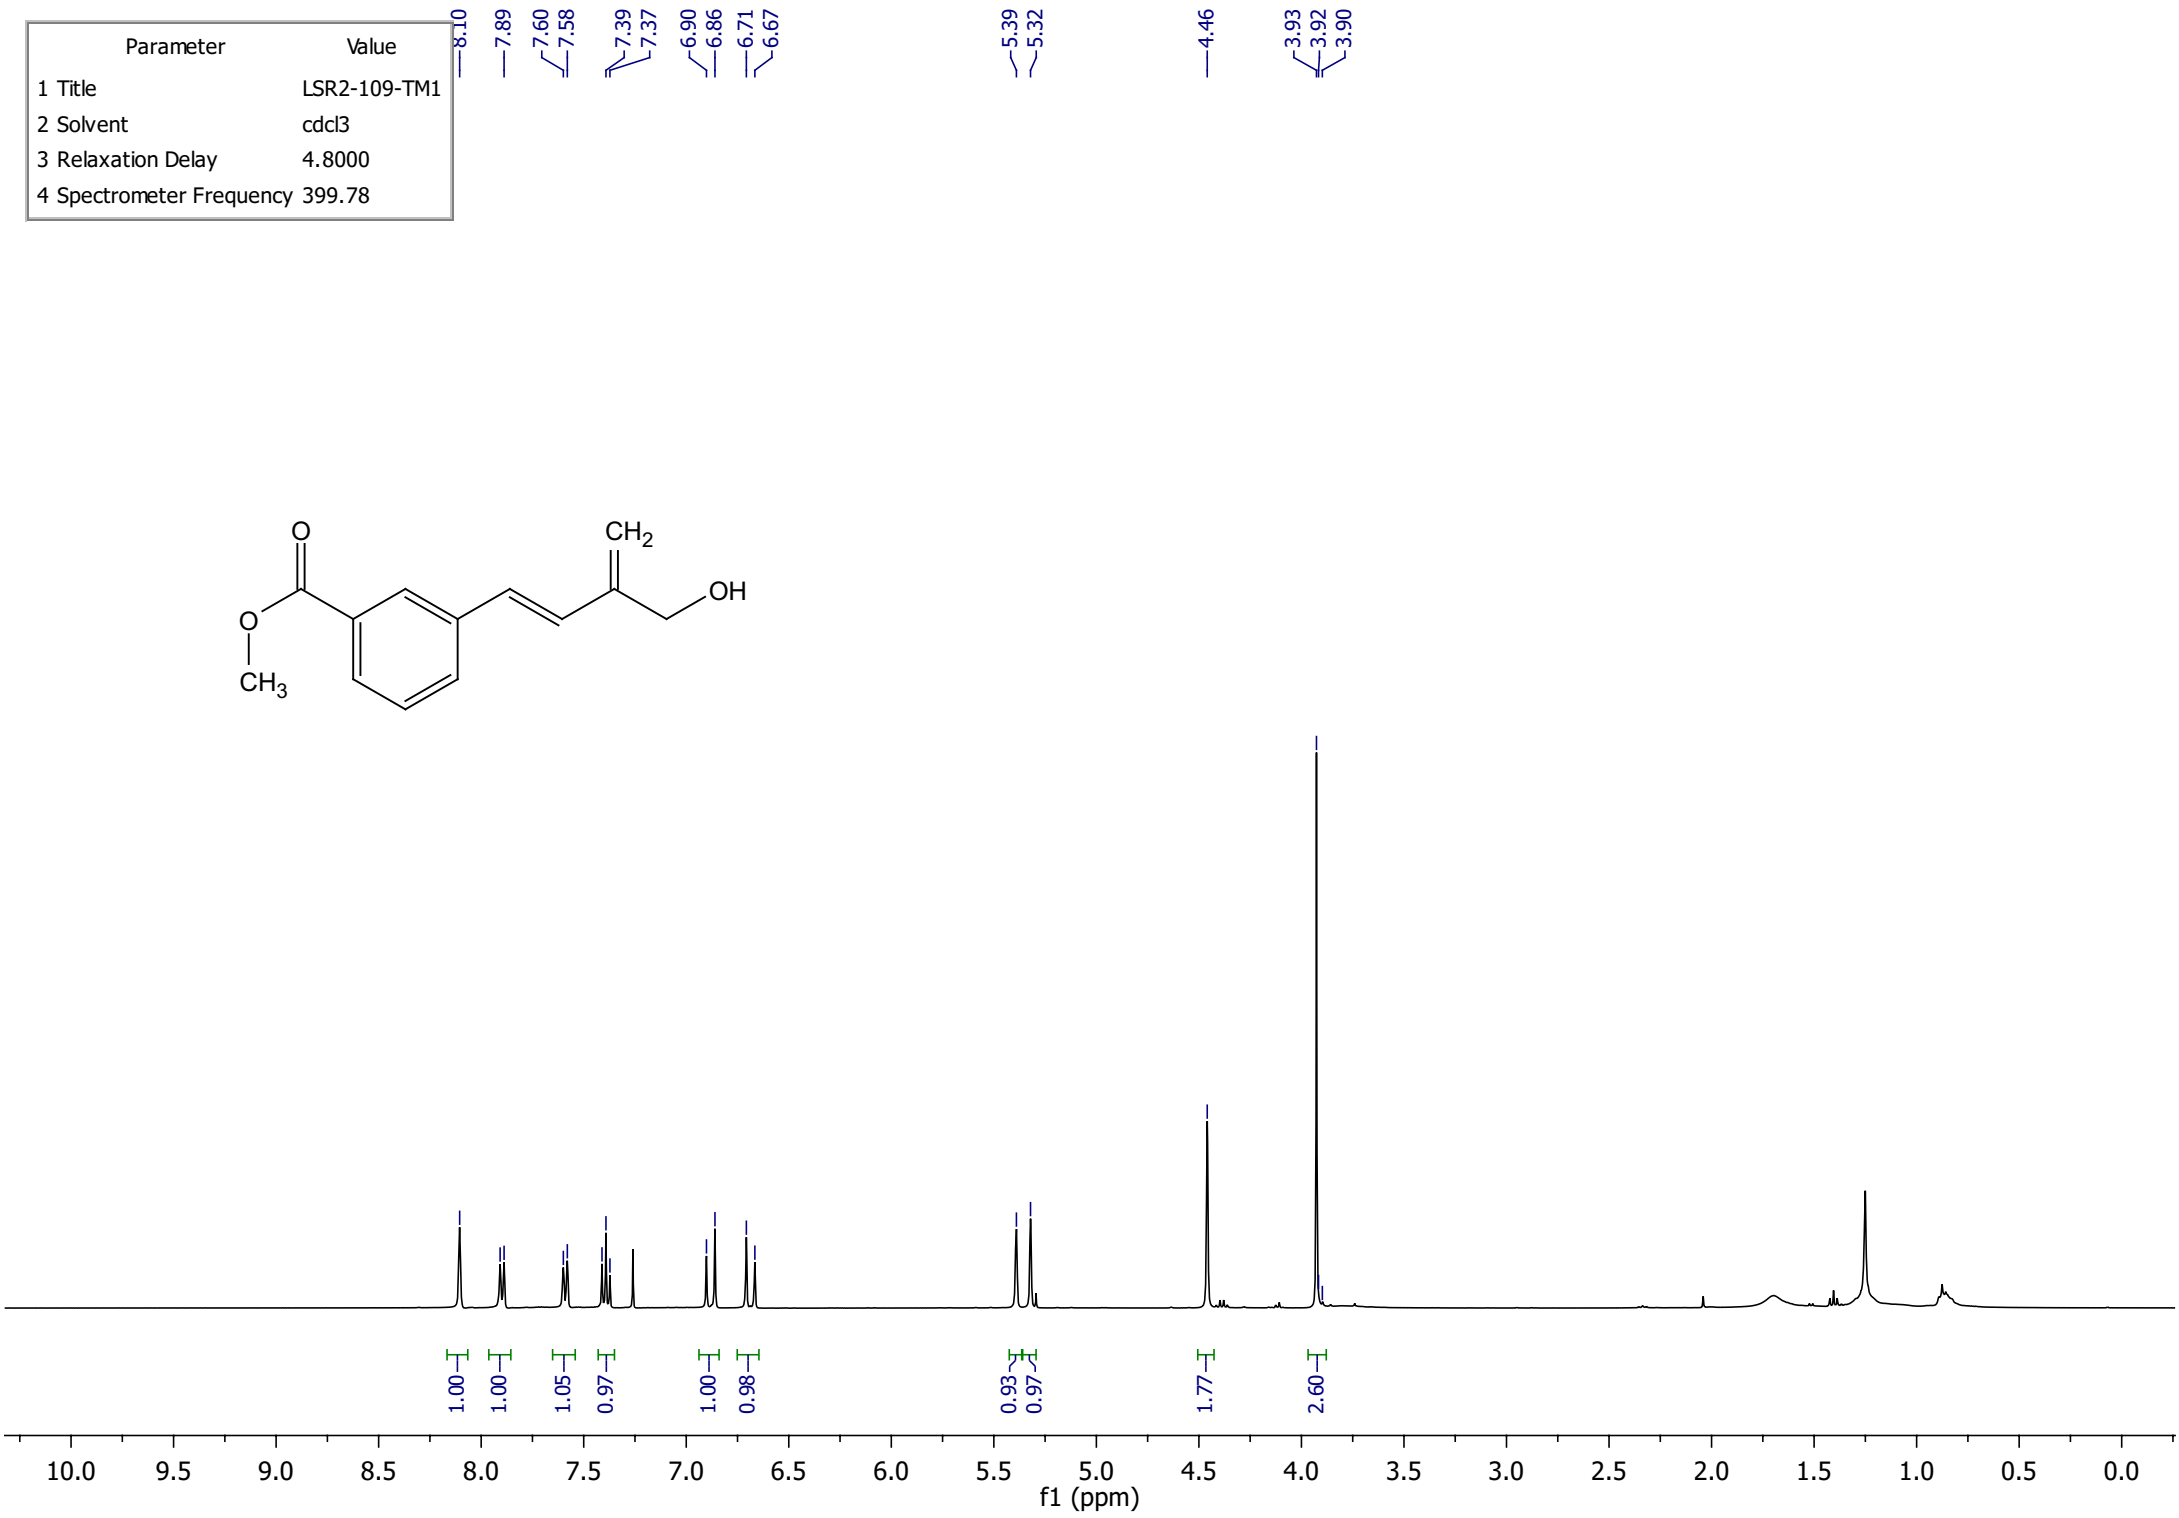

8.10  
7.89  
7.60  
7.58  
7.39  
7.37  
6.90  
6.86  
6.71  
6.67  
5.39  
5.32  
4.46  
3.93  
3.92  
3.90

| Parameter                | Value          |
|--------------------------|----------------|
| 1 Title                  | LSR2-109-TM1-C |
| 2 Solvent                | cdcl3          |
| 3 Relaxation Delay       | 1.0000         |
| 4 Spectrometer Frequency | 100.53         |

—166.98 —144.75 —137.38 —129.34 —128.68 —128.60 —127.75 —127.40 —117.07

—63.12 —52.19

—130.78 —130.52 —129.34 —128.68 —128.60 —127.75 —127.40

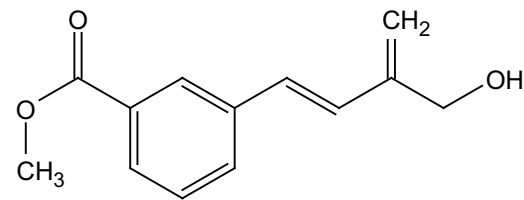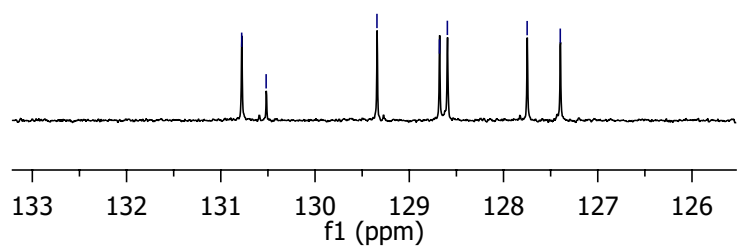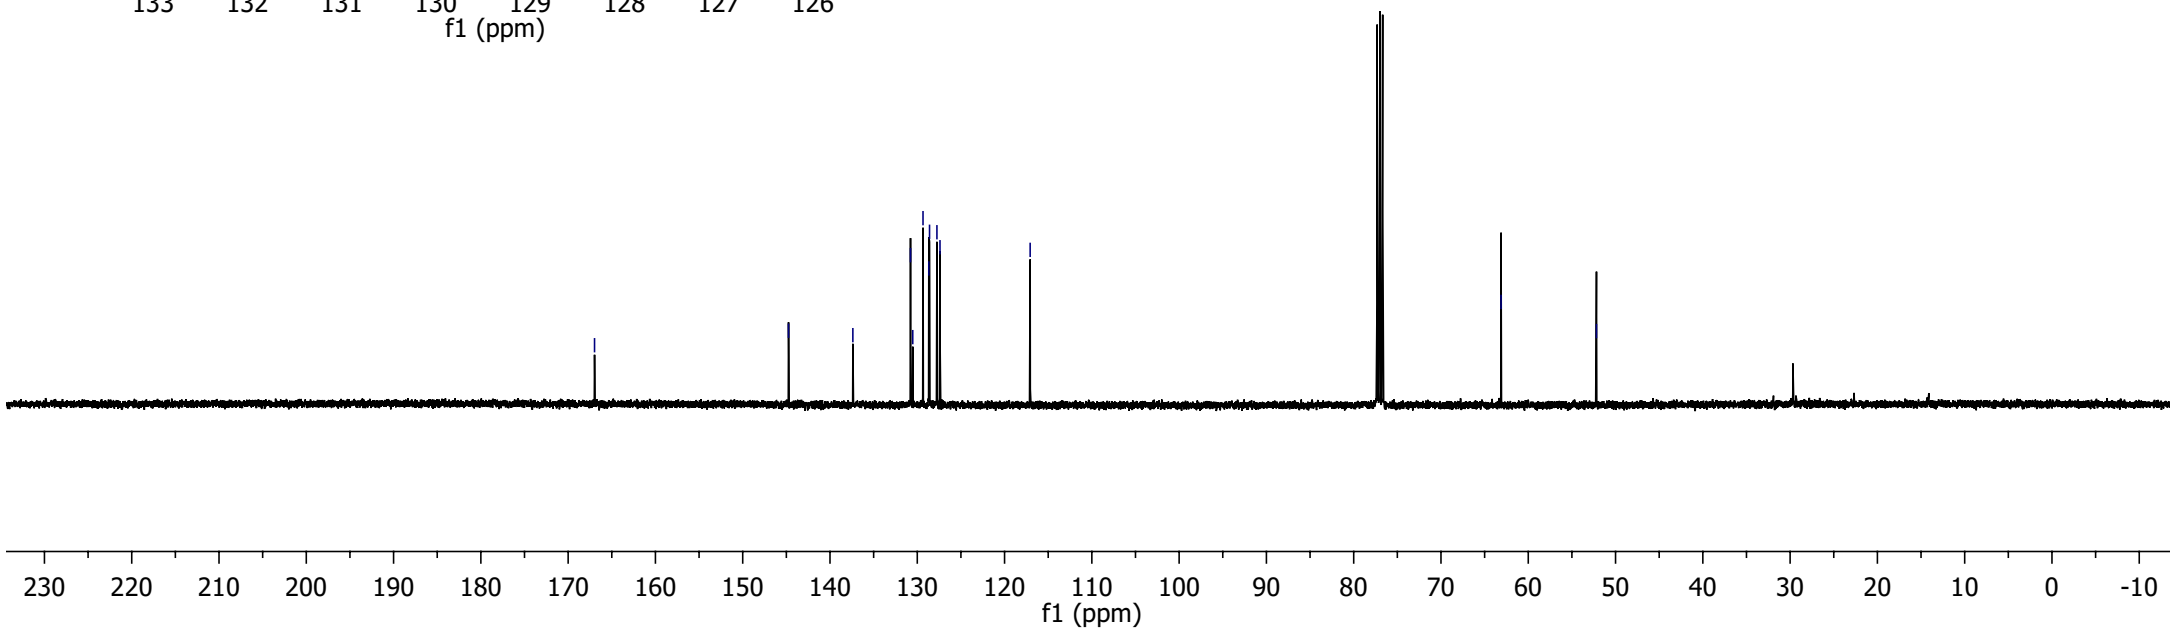



| Parameter                | Value        |
|--------------------------|--------------|
| 1 Title                  | LSR2-134-TM1 |
| 2 Solvent                | cdcl3        |
| 3 Relaxation Delay       | 4.8000       |
| 4 Spectrometer Frequency | 399.78       |

7.30  
7.29  
7.29  
7.28  
7.26  
7.25  
7.20  
7.20  
7.20  
6.72  
6.68  
6.67  
6.63  
5.31  
5.24  
4.42  
1.68

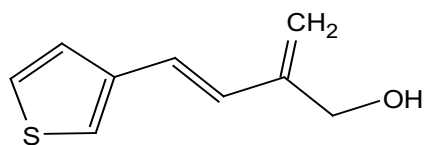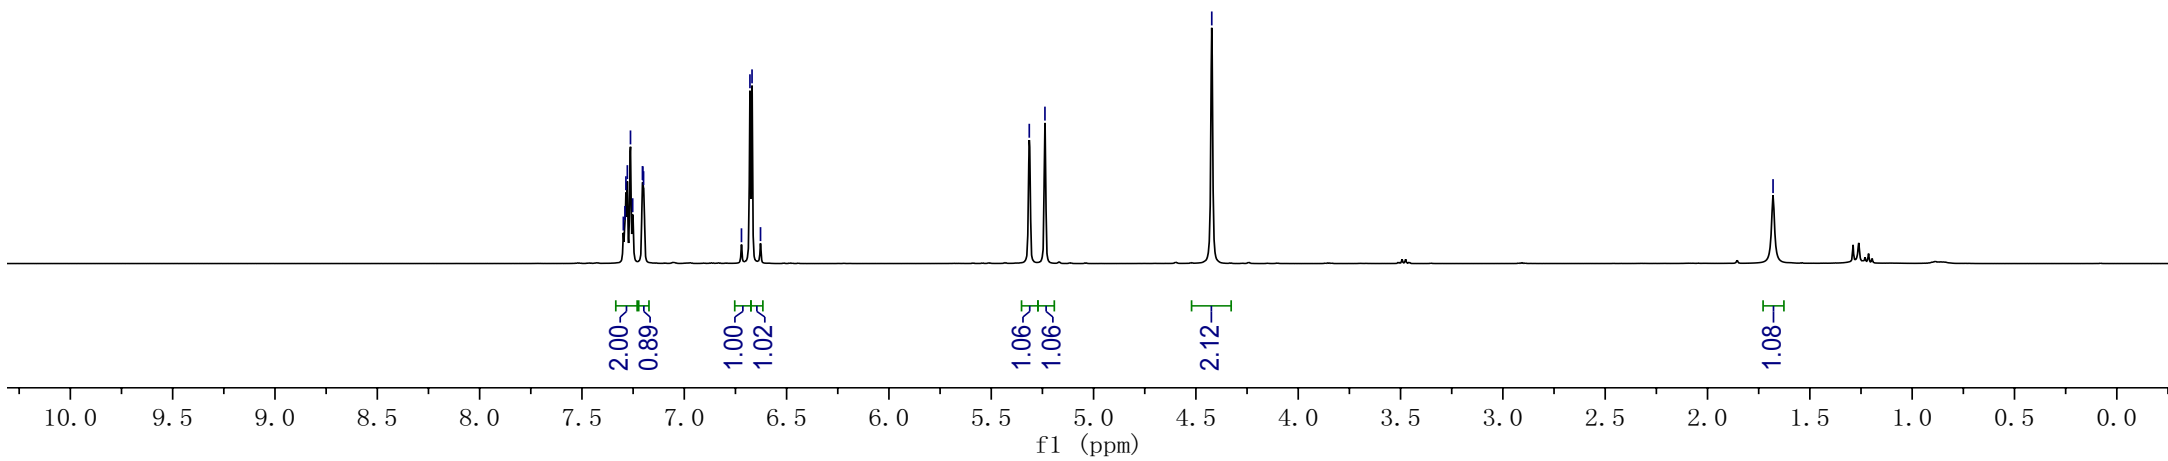

| Parameter                | Value          |
|--------------------------|----------------|
| 1 Title                  | LSR2-134-TM1-C |
| 2 Solvent                | cdcl3          |
| 3 Relaxation Delay       | 1.0000         |
| 4 Spectrometer Frequency | 100.53         |

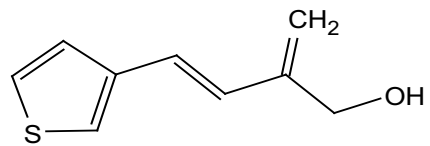

—144.97  
—139.79  
—128.10  
—124.68  
—123.10  
—122.54  
—115.72

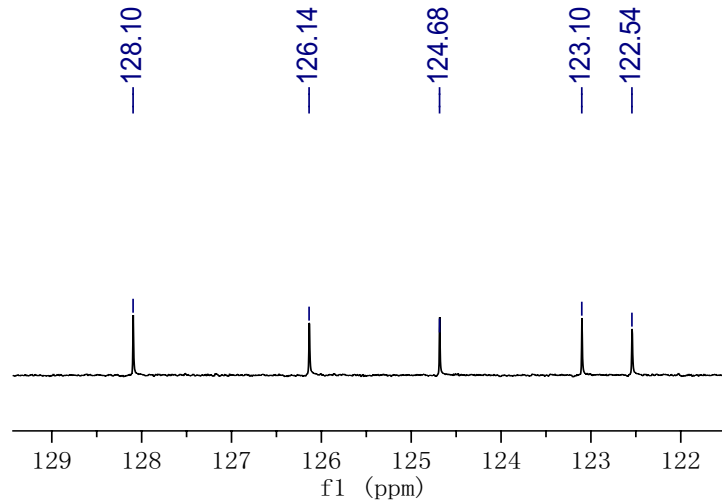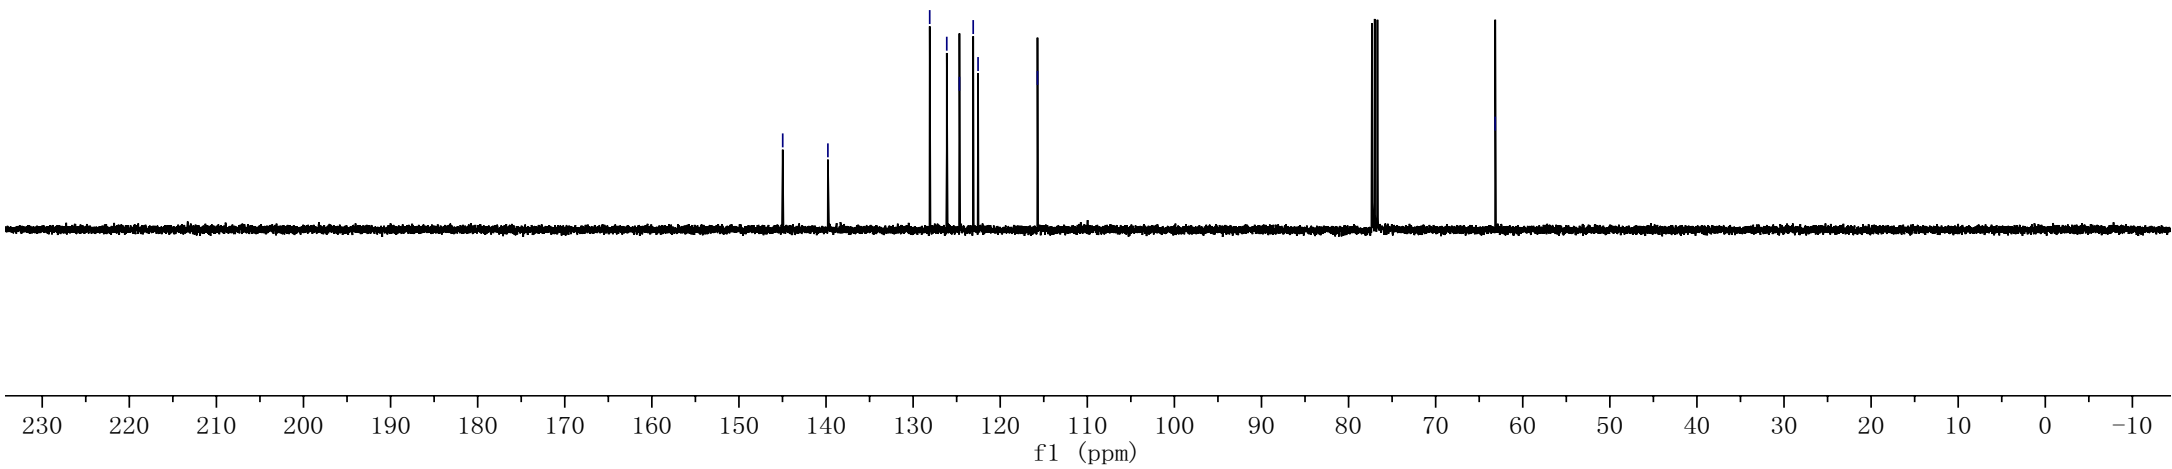

| Parameter                | Value        |
|--------------------------|--------------|
| 1 Title                  | LSR2-163-TM1 |
| 2 Solvent                | cdc13        |
| 3 Relaxation Delay       | 4.8000       |
| 4 Spectrometer Frequency | 399.78       |

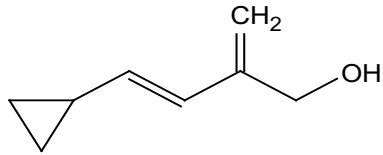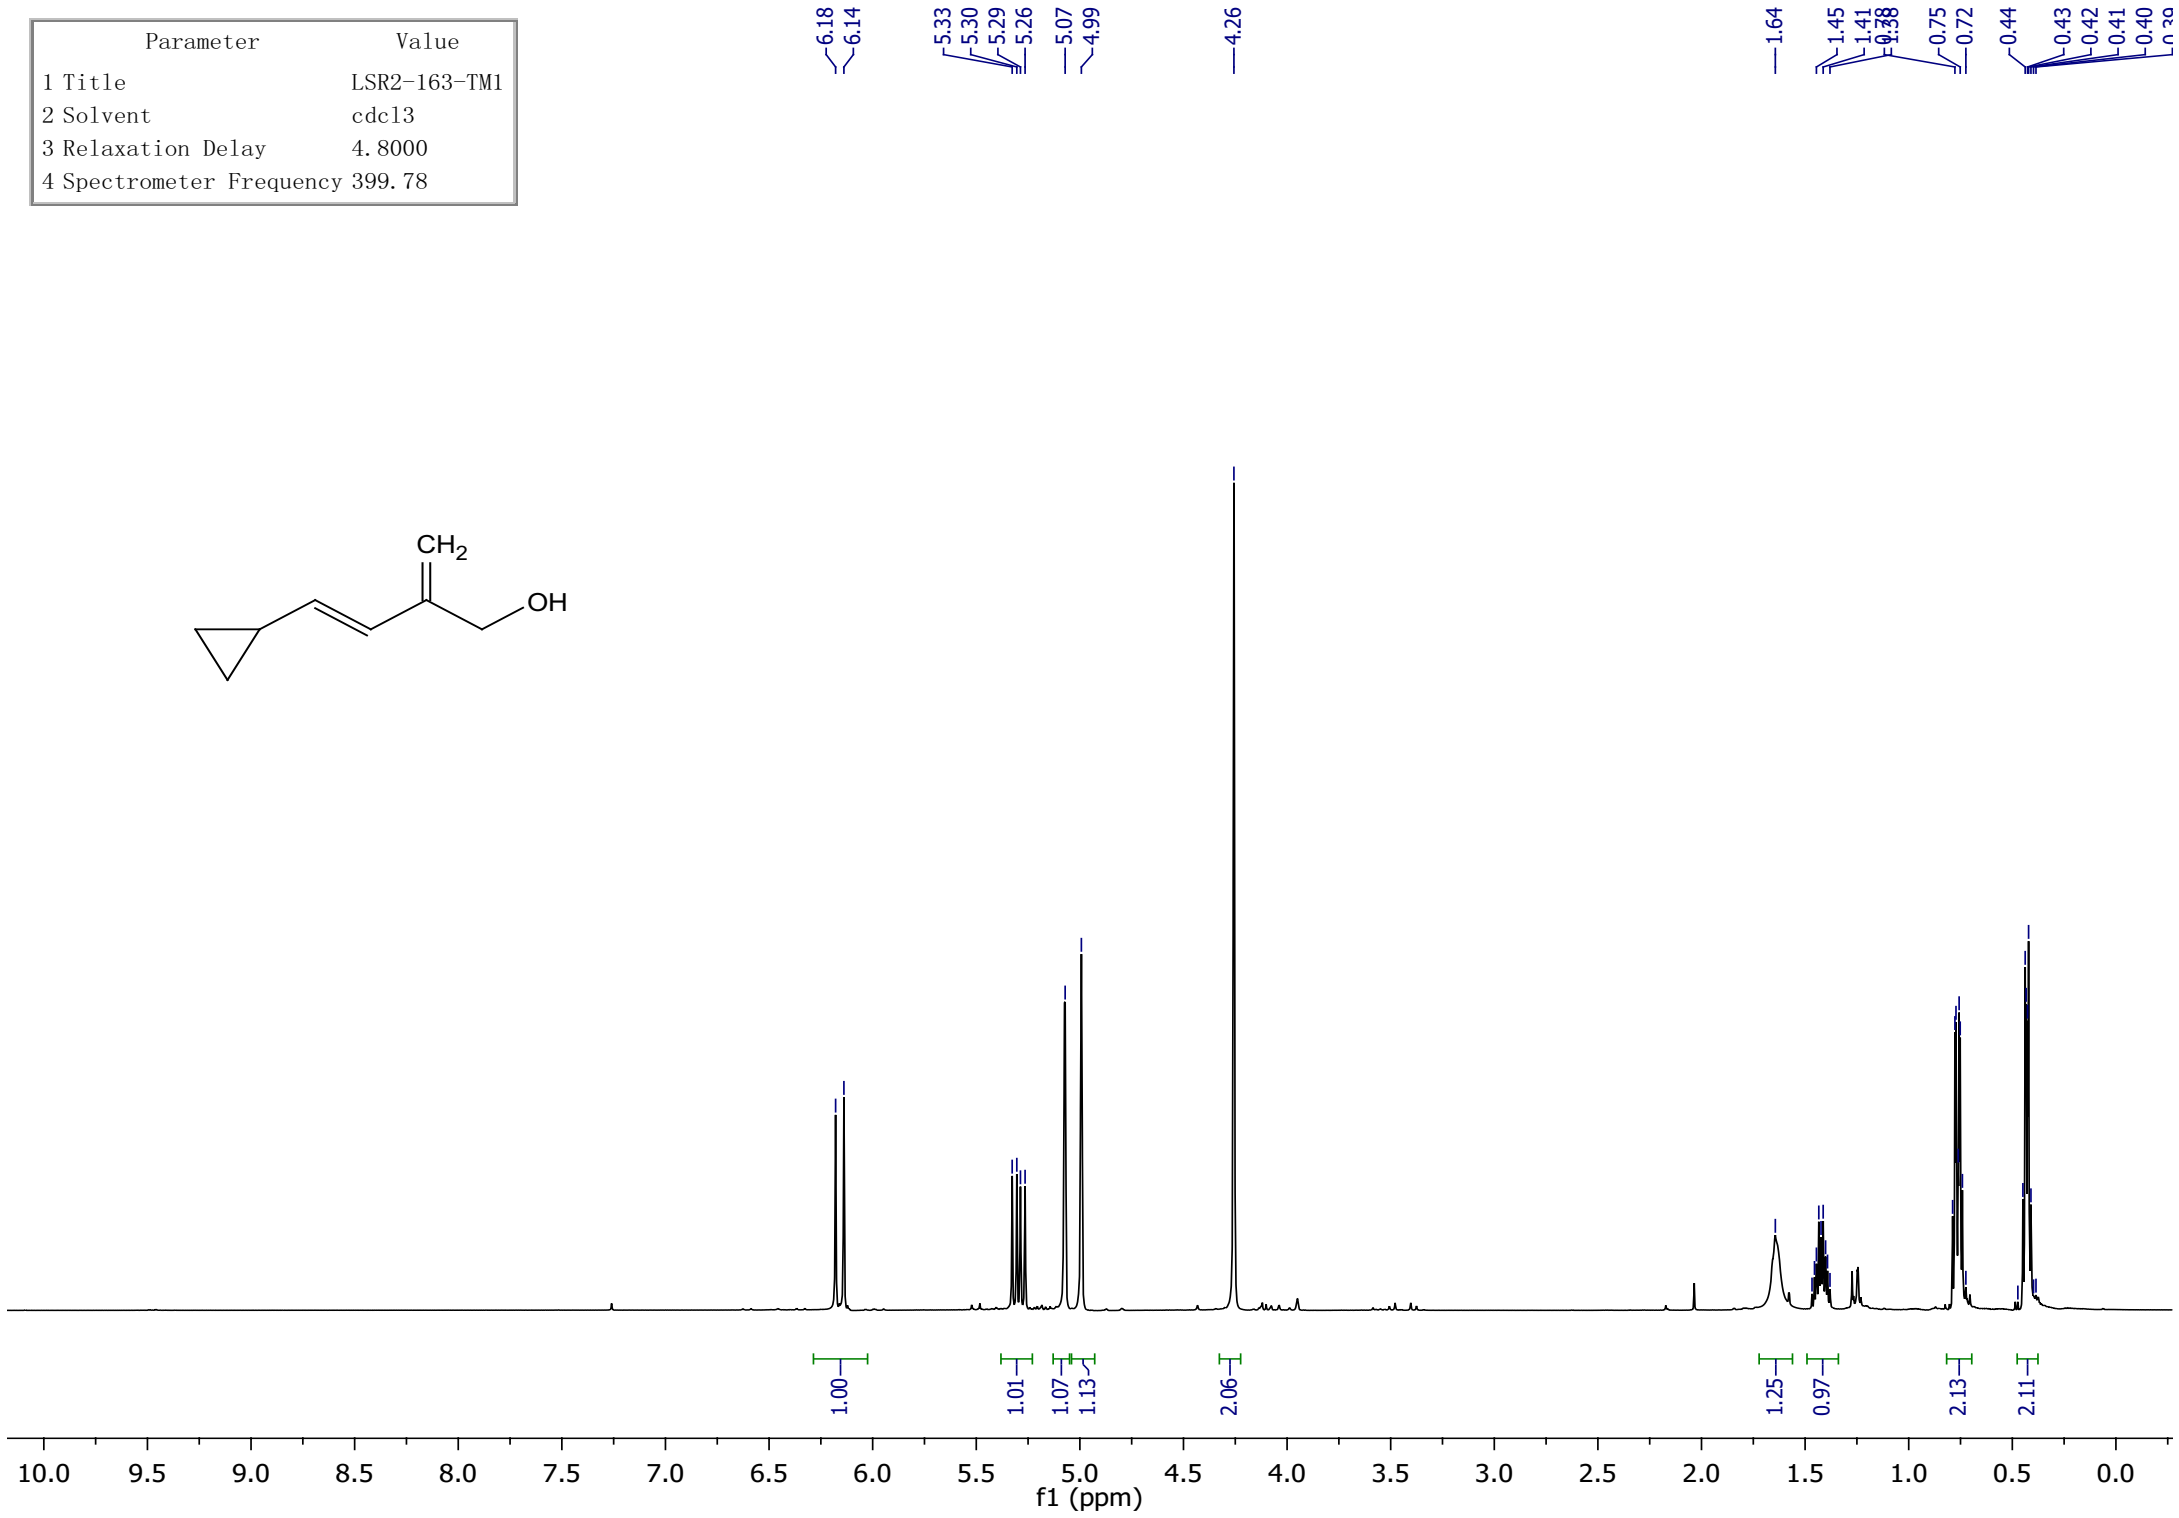

| Parameter                | Value          |
|--------------------------|----------------|
| 1 Title                  | LSR2-149-TM1-C |
| 2 Solvent                | cdc13          |
| 3 Relaxation Delay       | 1.0000         |
| 4 Spectrometer Frequency | 100.53         |

—144.87

—135.05

—126.94

—112.51

—63.32

—14.41

—7.25

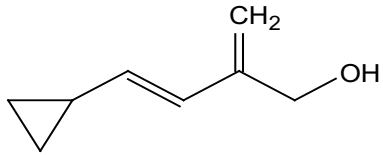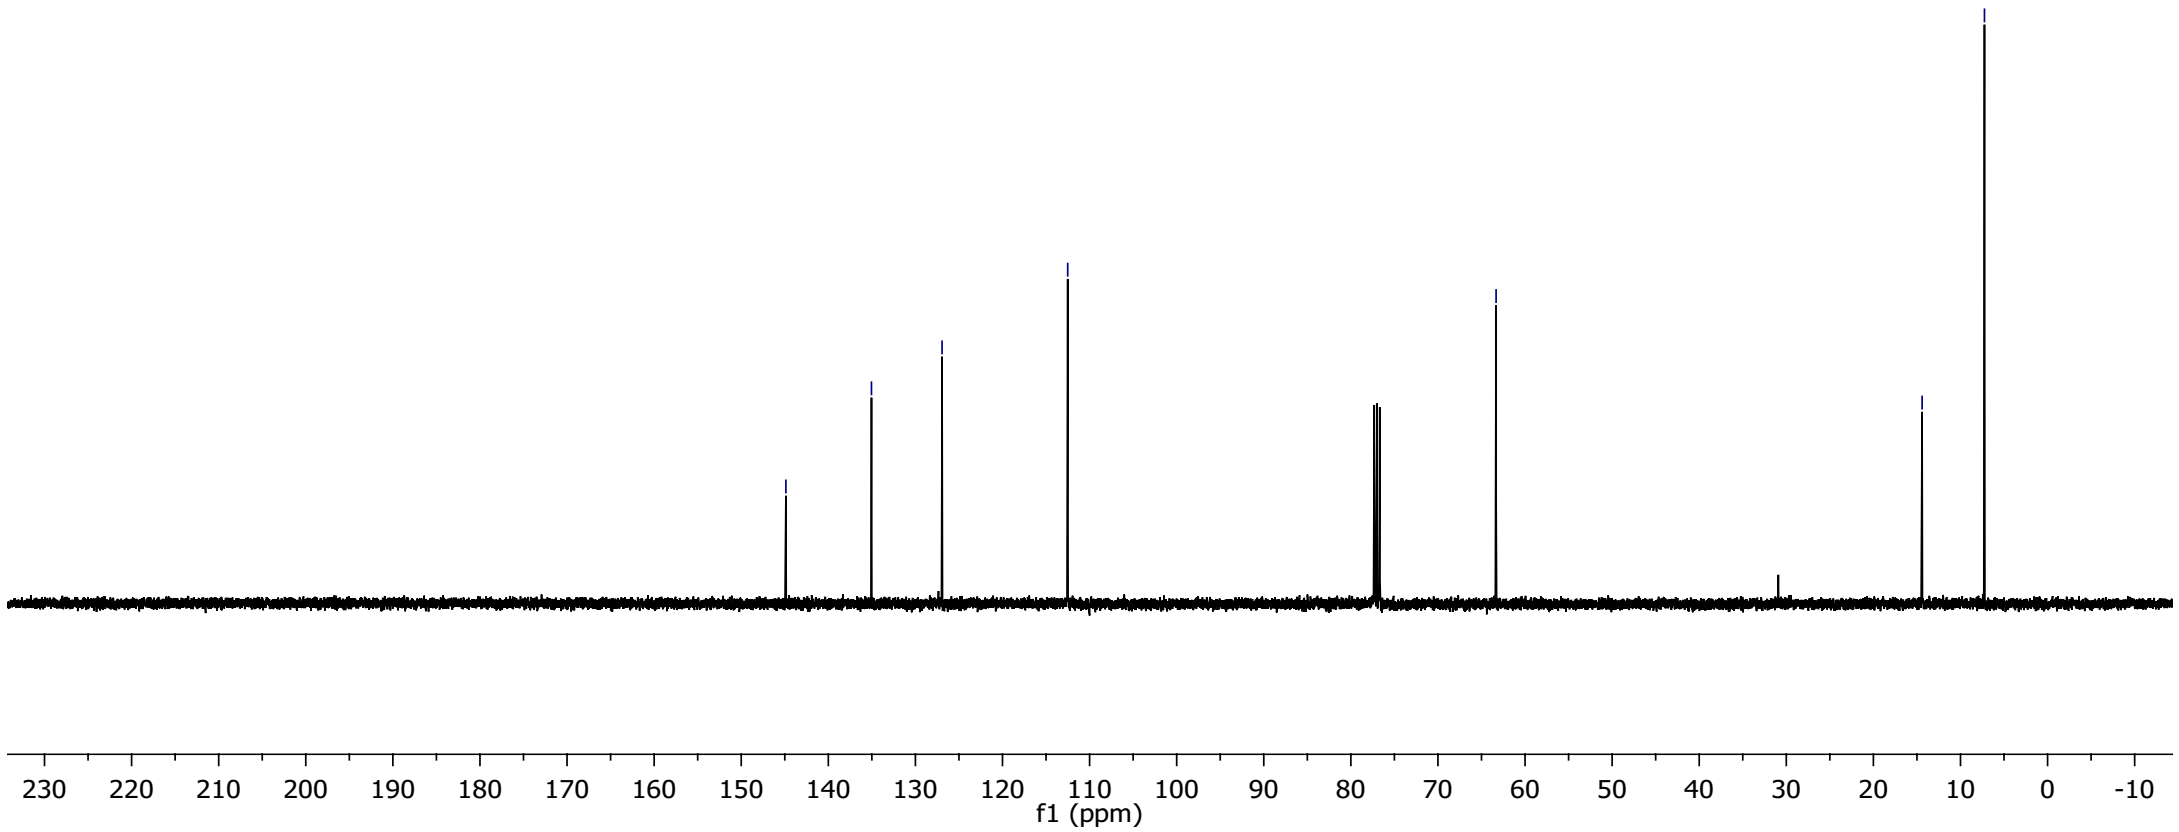

| Parameter                | Value        |
|--------------------------|--------------|
| 1 Title                  | LSR2-146-TM1 |
| 2 Solvent                | cdcl3        |
| 3 Relaxation Delay       | 4.8000       |
| 4 Spectrometer Frequency | 399.78       |

6.44  
6.40  
6.26  
6.22

5.29  
5.19  
5.04

4.36

1.88  
1.64

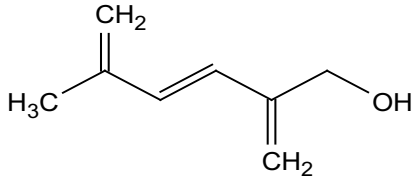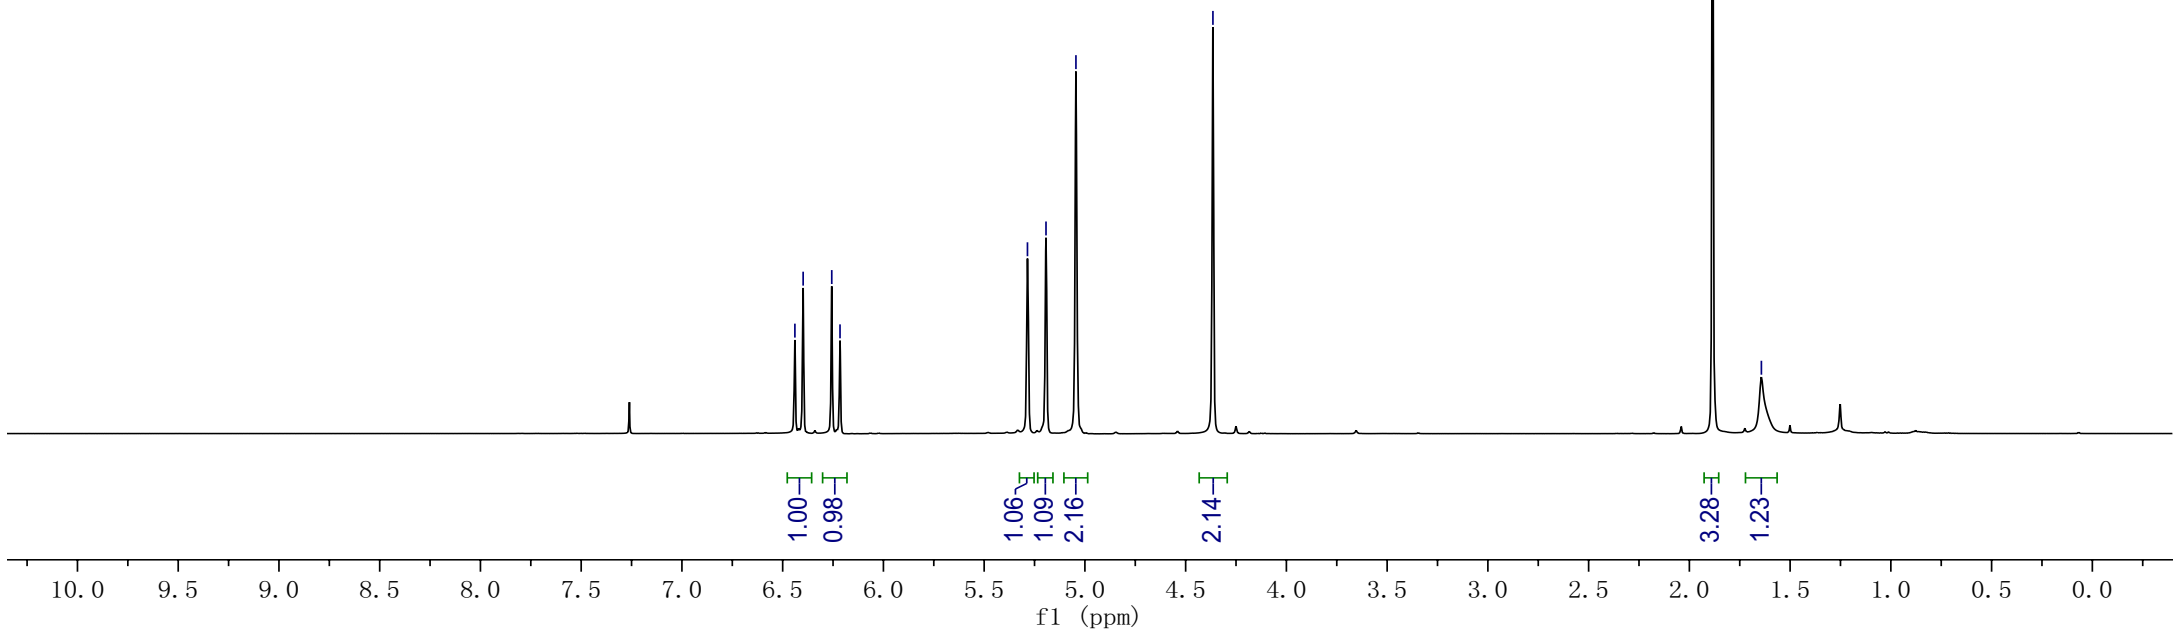

| Parameter                | Value          |
|--------------------------|----------------|
| 1 Title                  | LSR2-146-TM1-C |
| 2 Solvent                | cdcl3          |
| 3 Relaxation Delay       | 1.0000         |
| 4 Spectrometer Frequency | 100.53         |

—145.03  
 —141.78  
 —131.73  
 —128.16  
 —117.72  
 —115.76

—63.14

—18.31

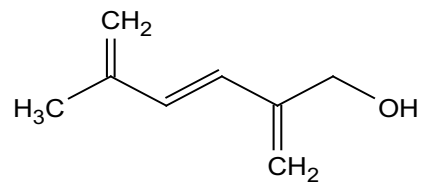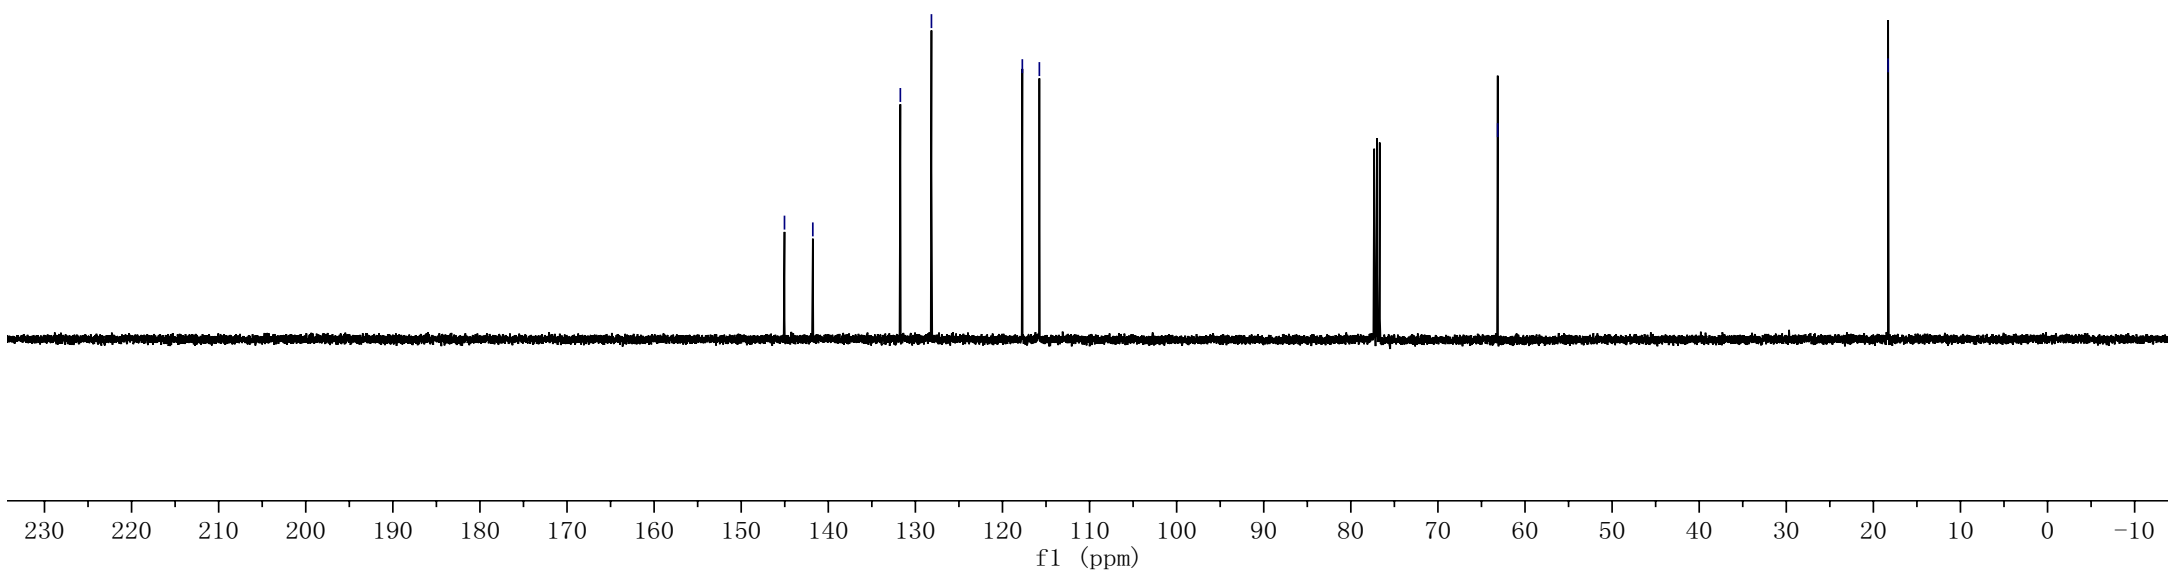

| Parameter                | Value        |
|--------------------------|--------------|
| 1 Title                  | LSR2-145-TM1 |
| 2 Solvent                | cdcl3        |
| 3 Relaxation Delay       | 4.8000       |
| 4 Spectrometer Frequency | 399.78       |

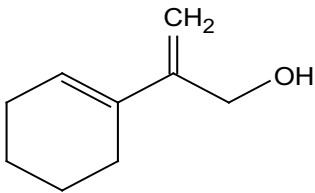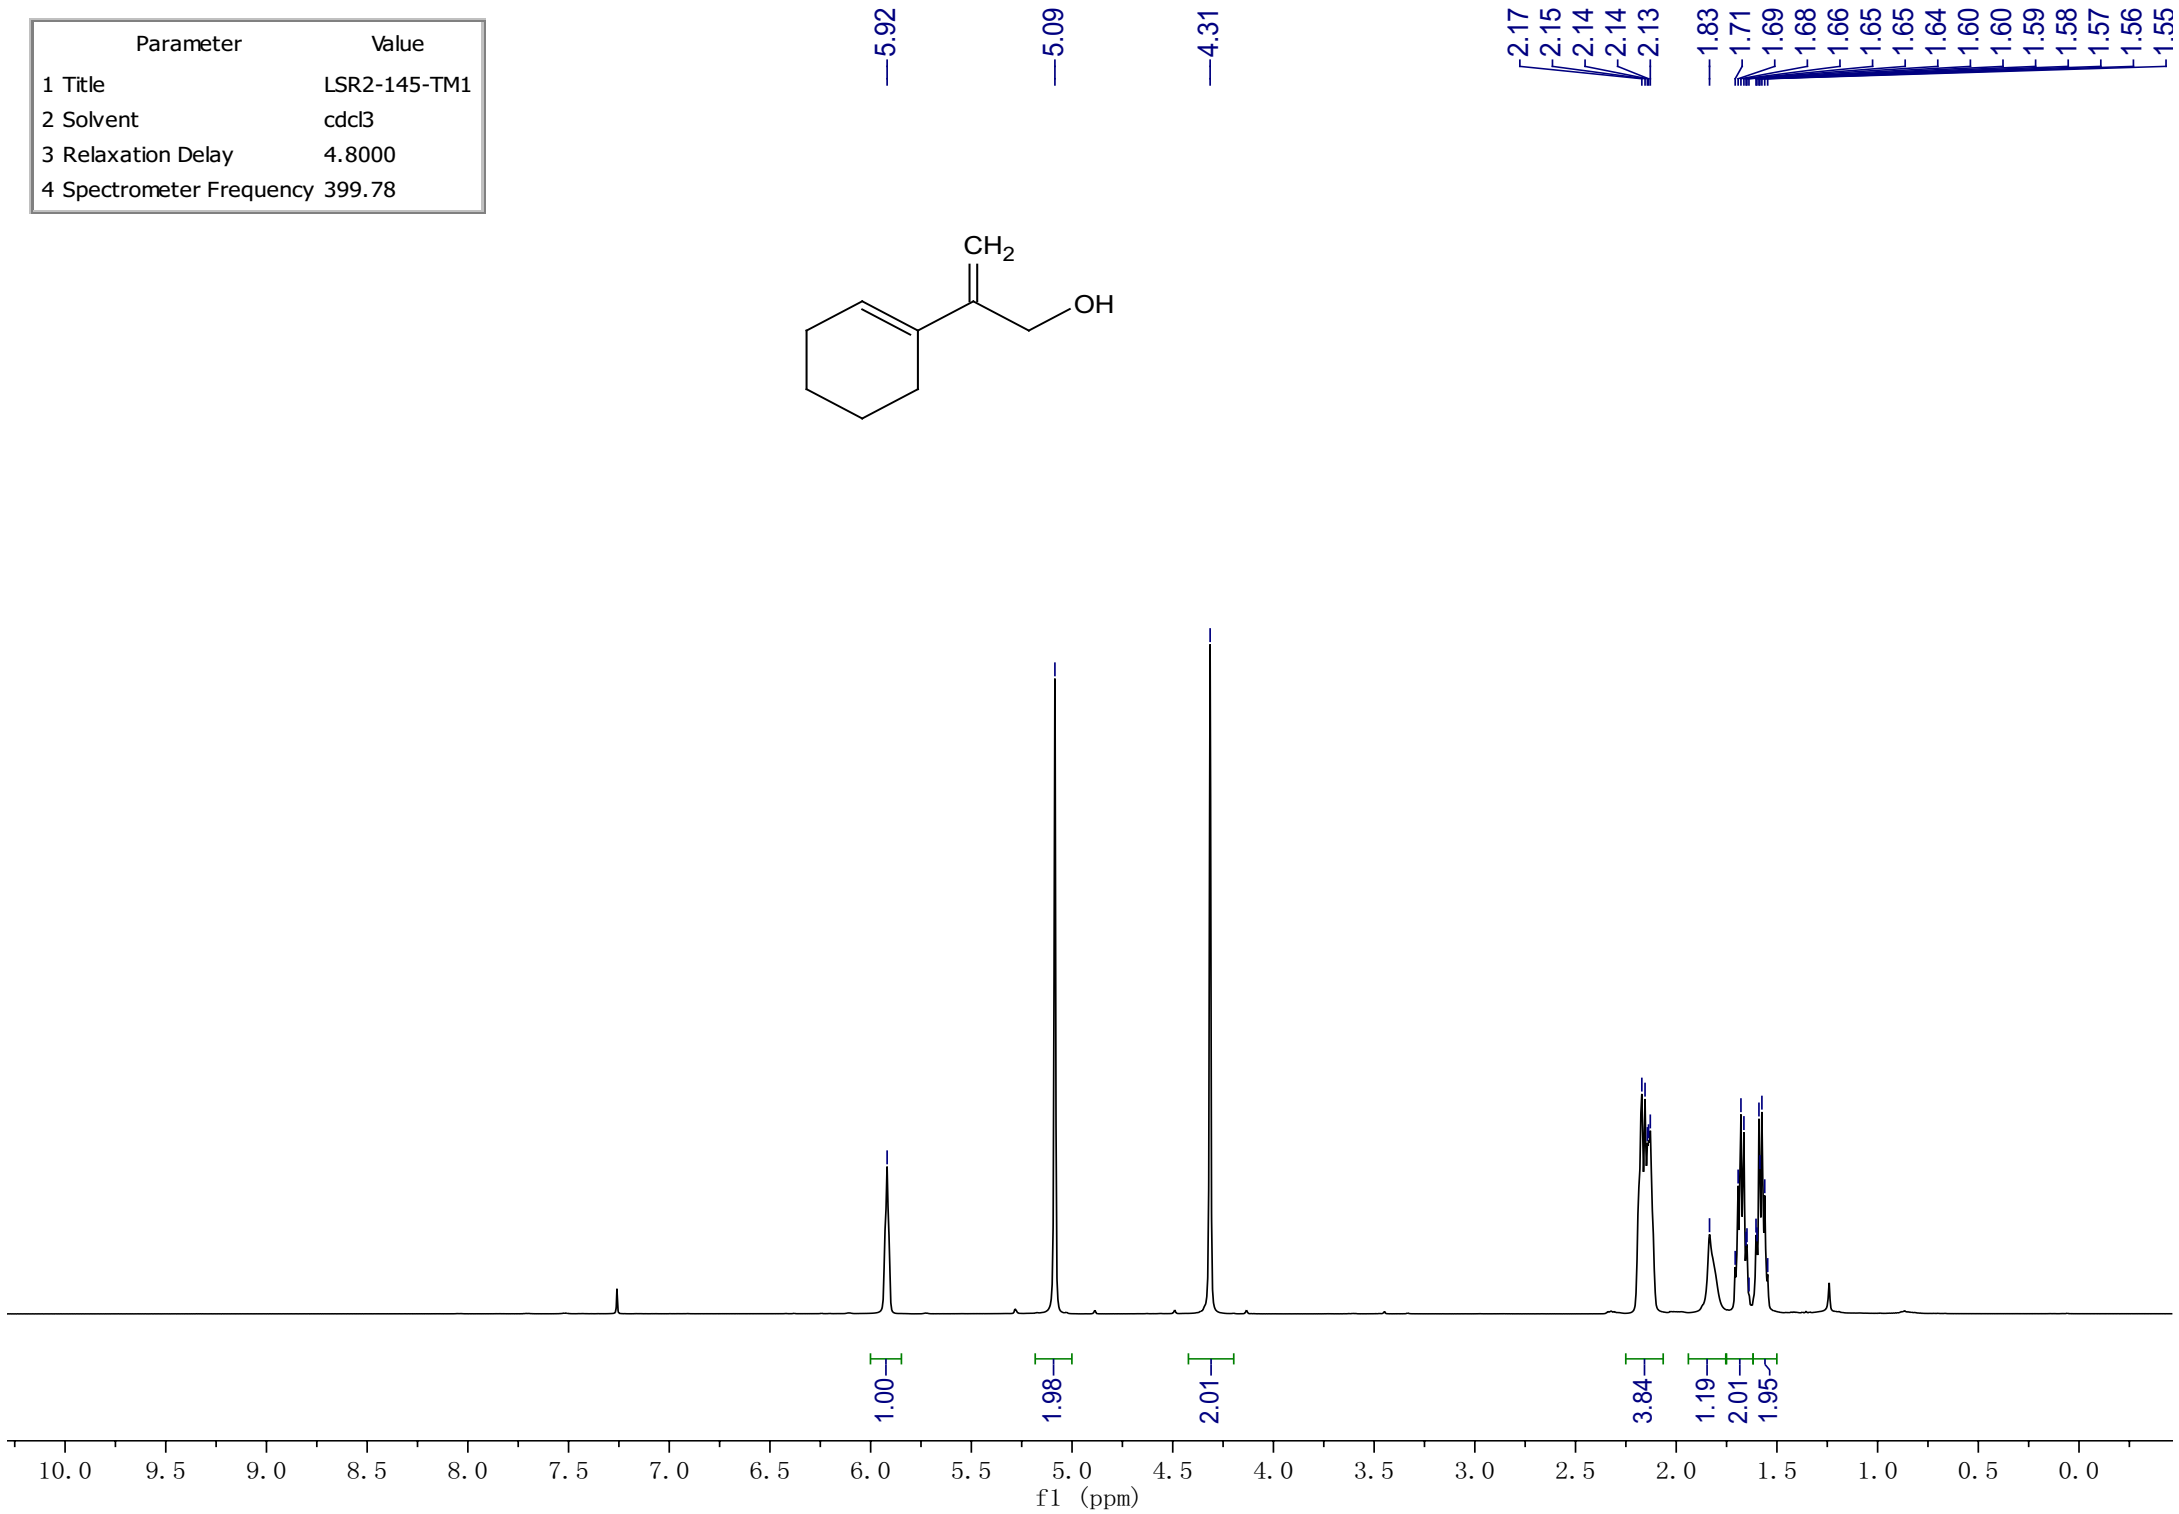

| Parameter                | Value          |
|--------------------------|----------------|
| 1 Title                  | LSR2-145-TM1-C |
| 2 Solvent                | cdcl3          |
| 3 Relaxation Delay       | 1.0000         |
| 4 Spectrometer Frequency | 100.53         |

—147.22

—133.98

—124.98

—109.60

—64.15

—25.78

—25.70

—22.68

—22.06

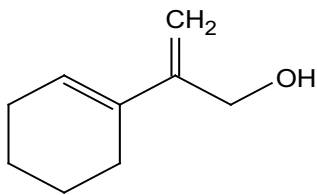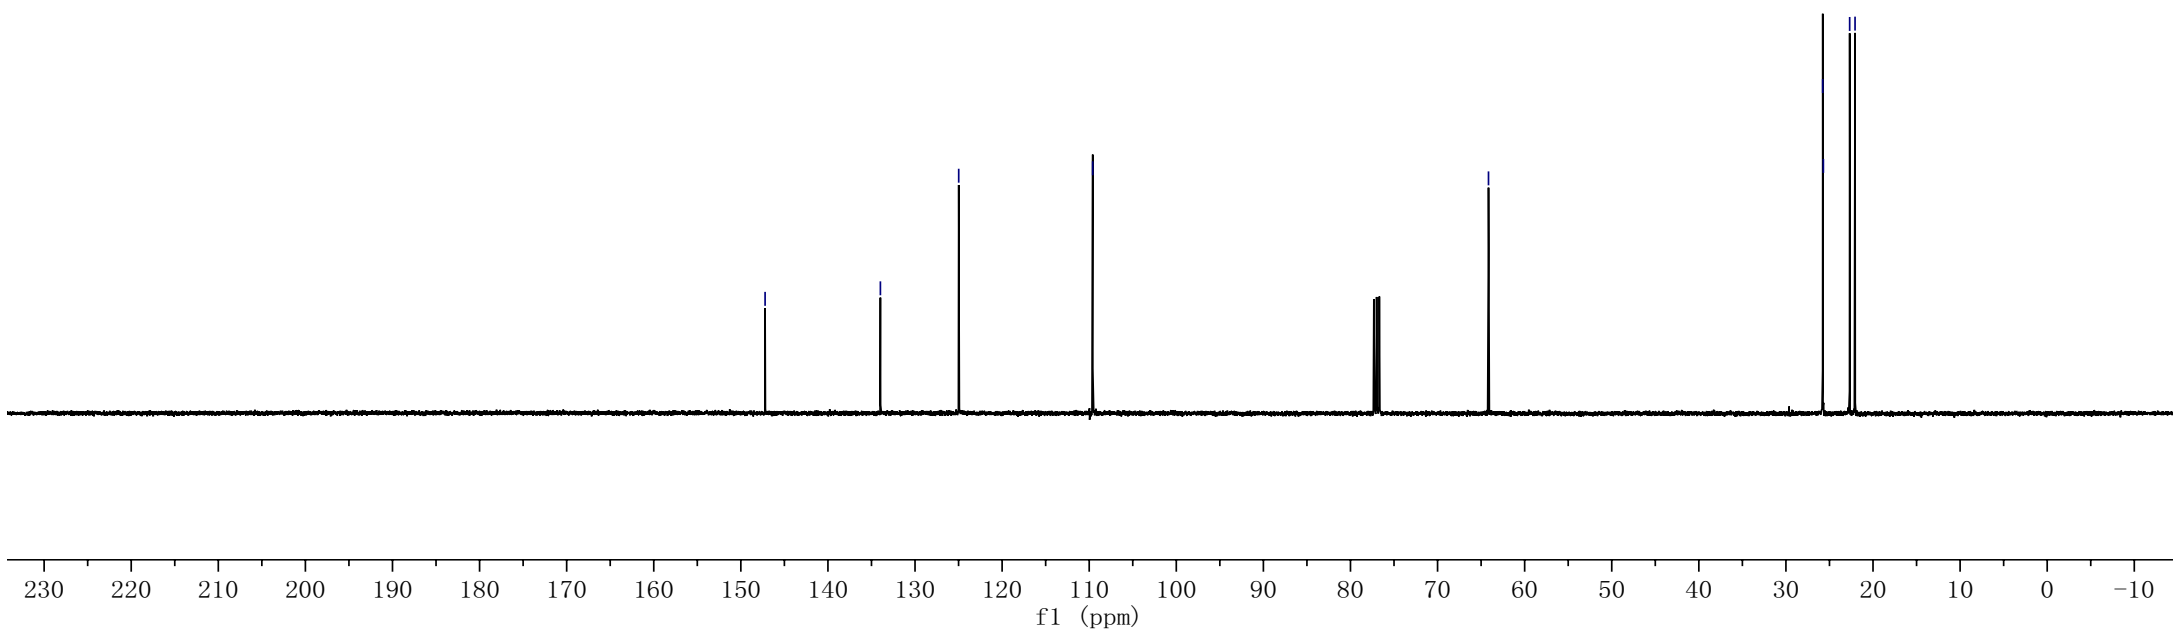



| Parameter                | Value        |
|--------------------------|--------------|
| 1 Title                  | LSR2-165-TM1 |
| 2 Solvent                | cdc13        |
| 3 Relaxation Delay       | 4.8000       |
| 4 Spectrometer Frequency | 399.78       |

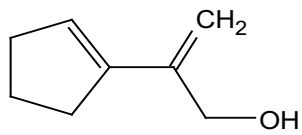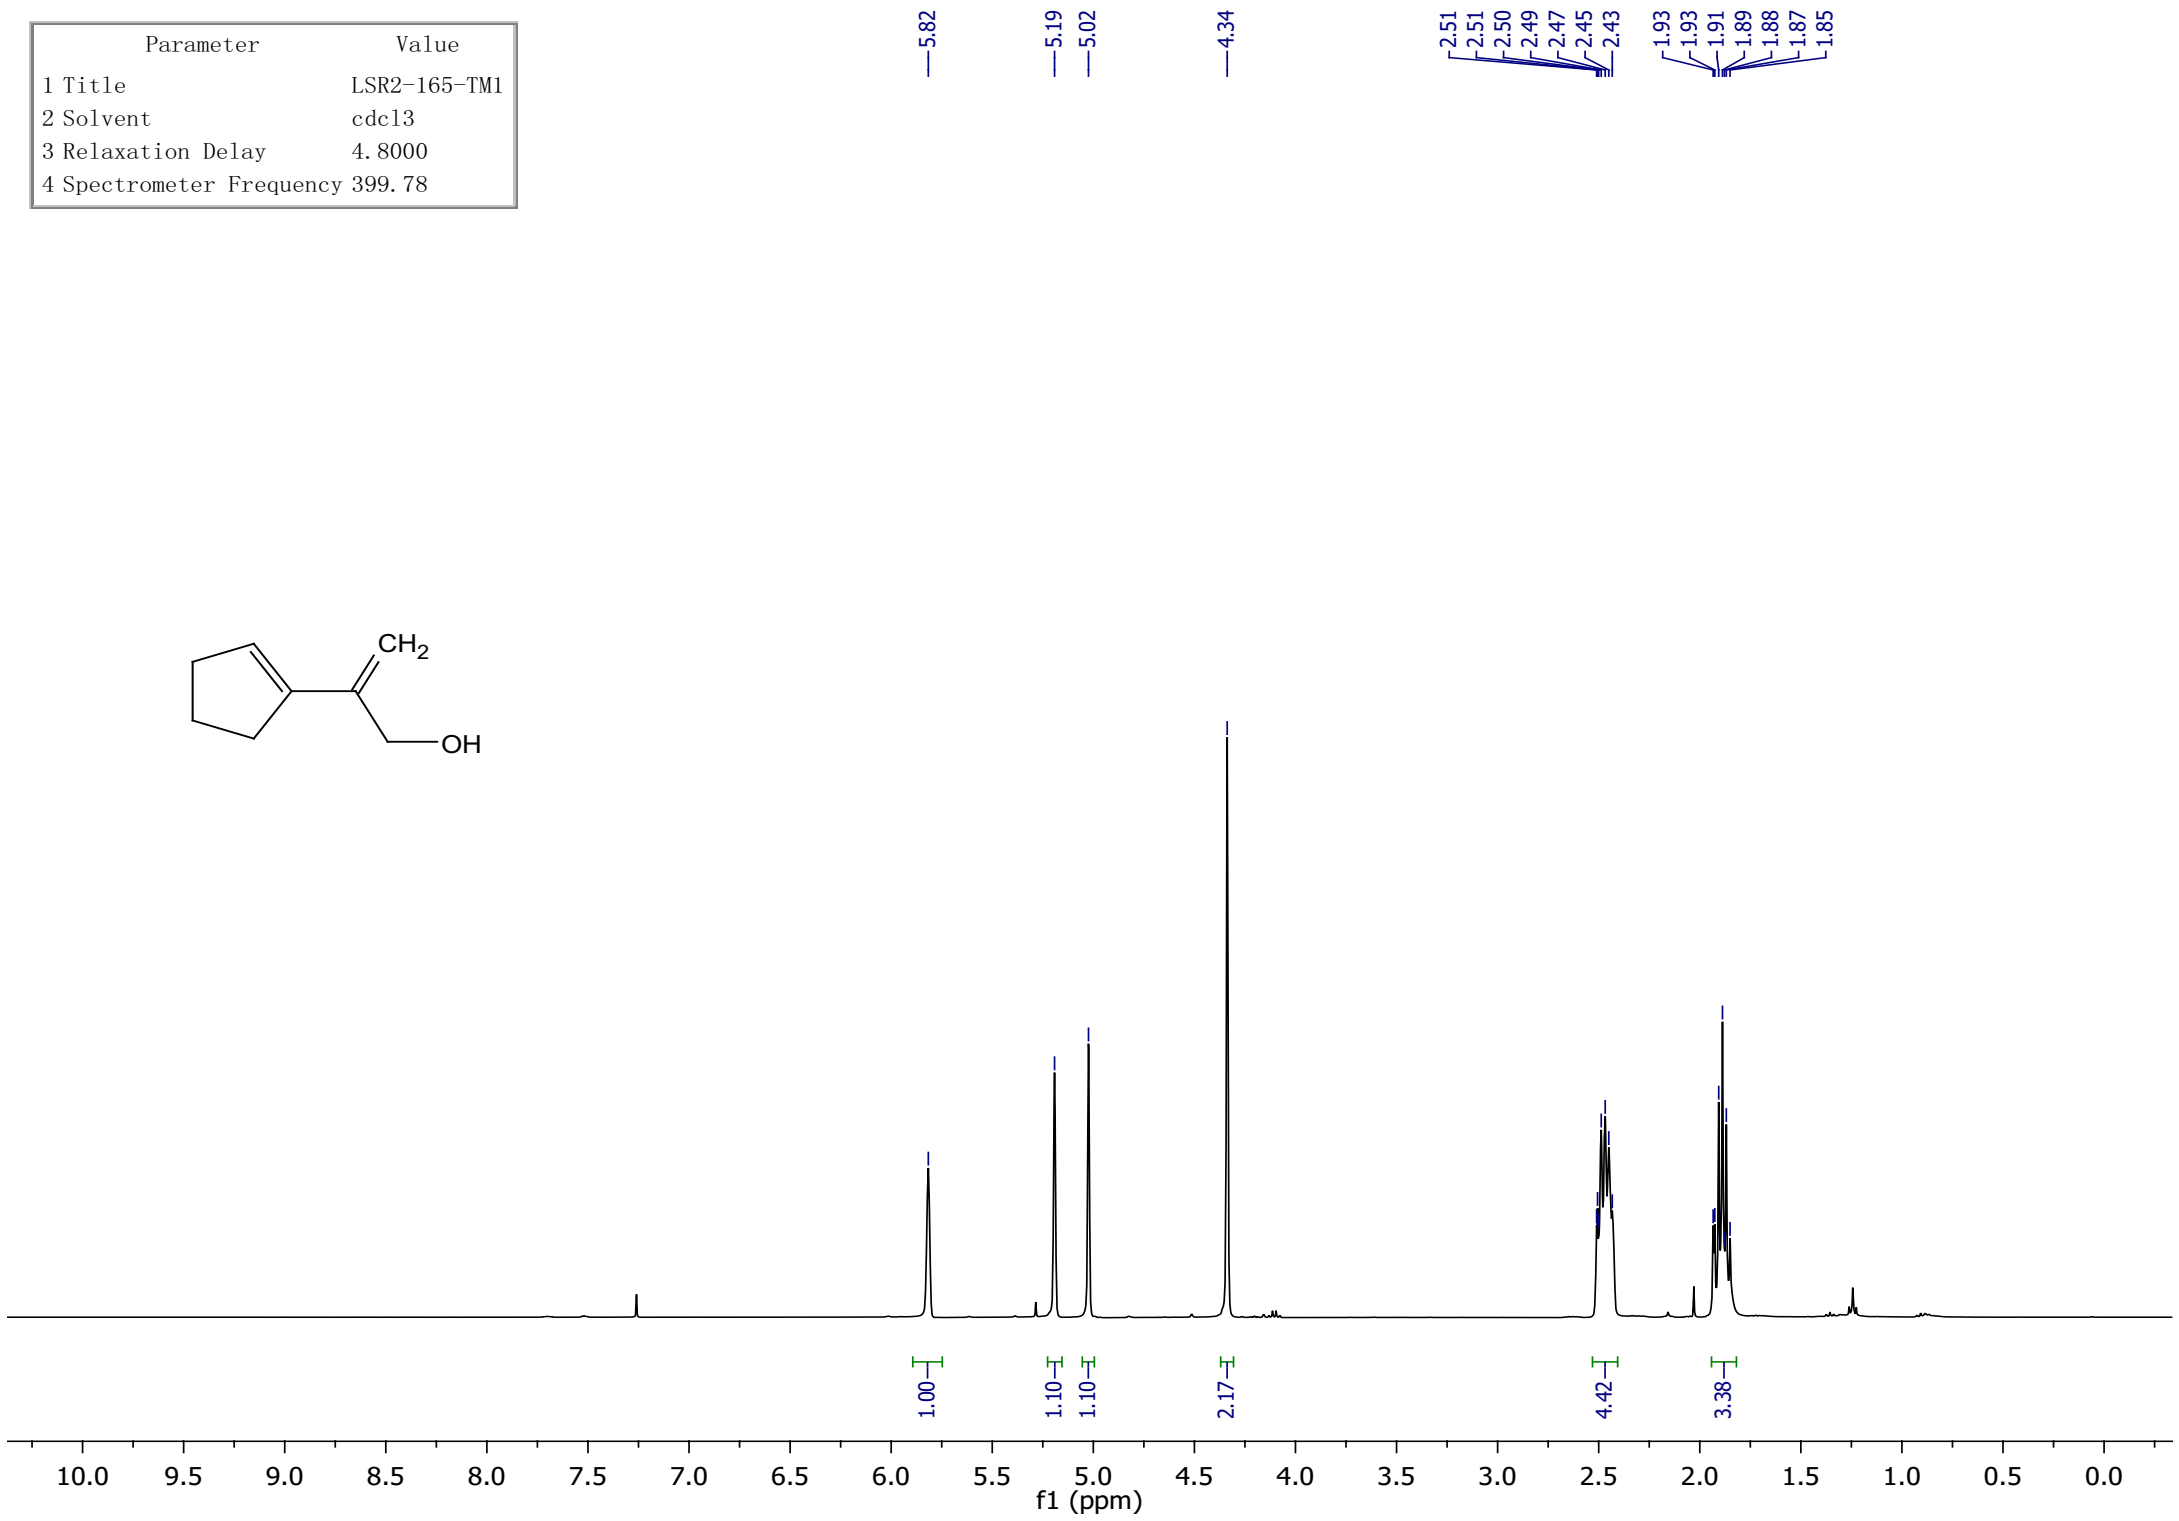

| Parameter                | Value          |
|--------------------------|----------------|
| 1 Title                  | LSR2-165-TM1-C |
| 2 Solvent                | cdc13          |
| 3 Relaxation Delay       | 1.0000         |
| 4 Spectrometer Frequency | 100.53         |

143.41 141.02 127.12 111.49 64.16 33.41 32.67 22.55

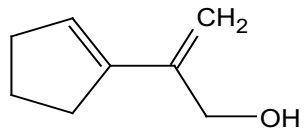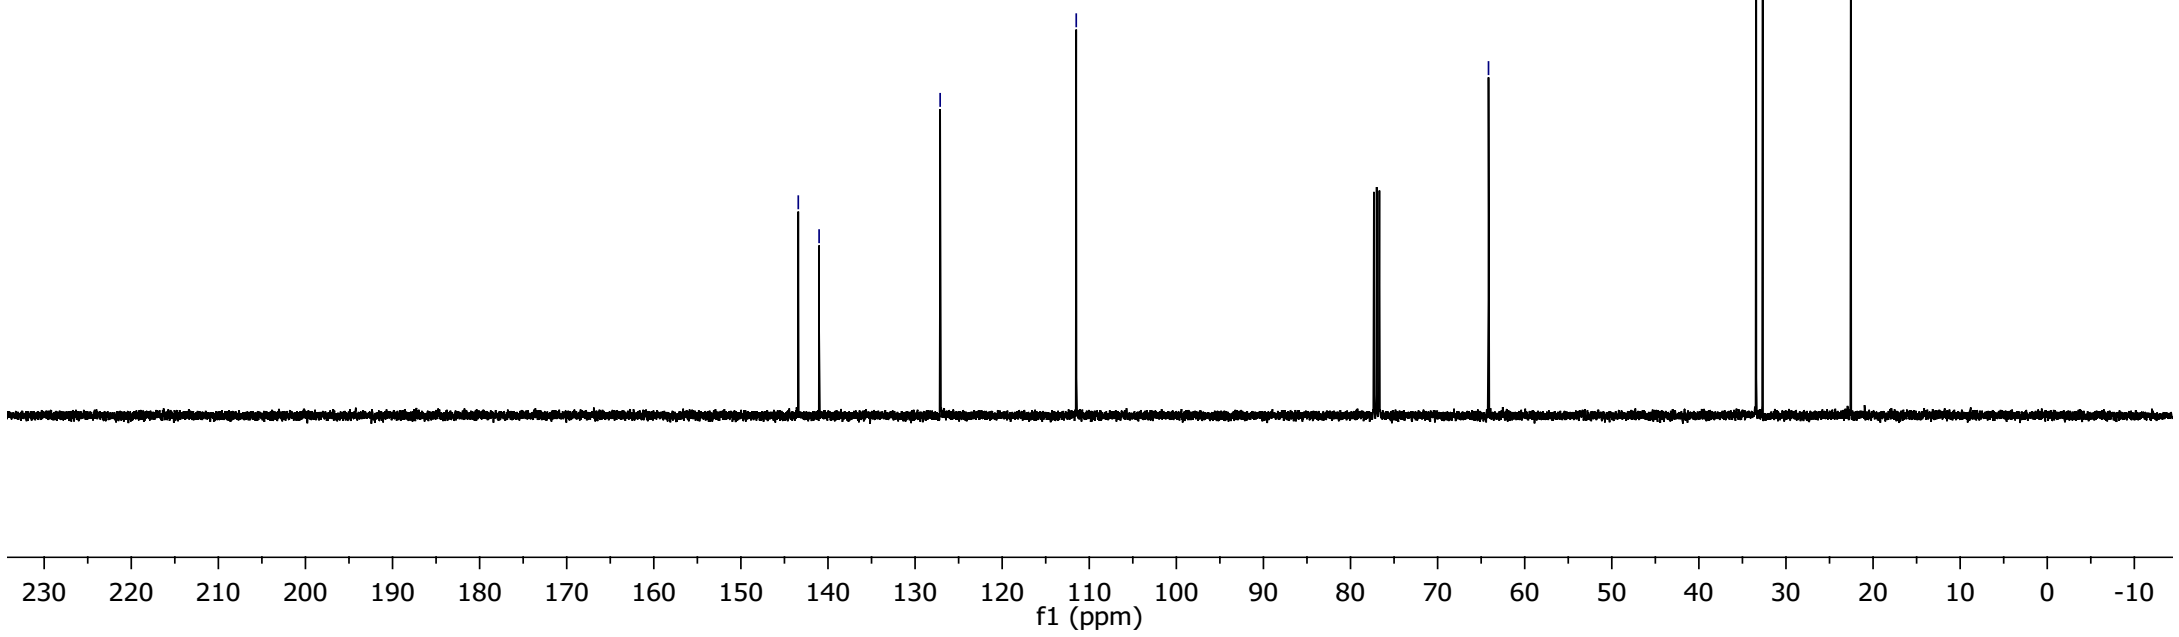

| Parameter                | Value       |
|--------------------------|-------------|
| 1 Title                  | LSR2-123-TM |
| 2 Solvent                | cdcl3       |
| 3 Relaxation Delay       | 4.8000      |
| 4 Spectrometer Frequency | 399.78      |

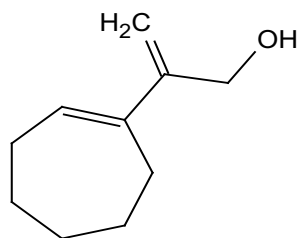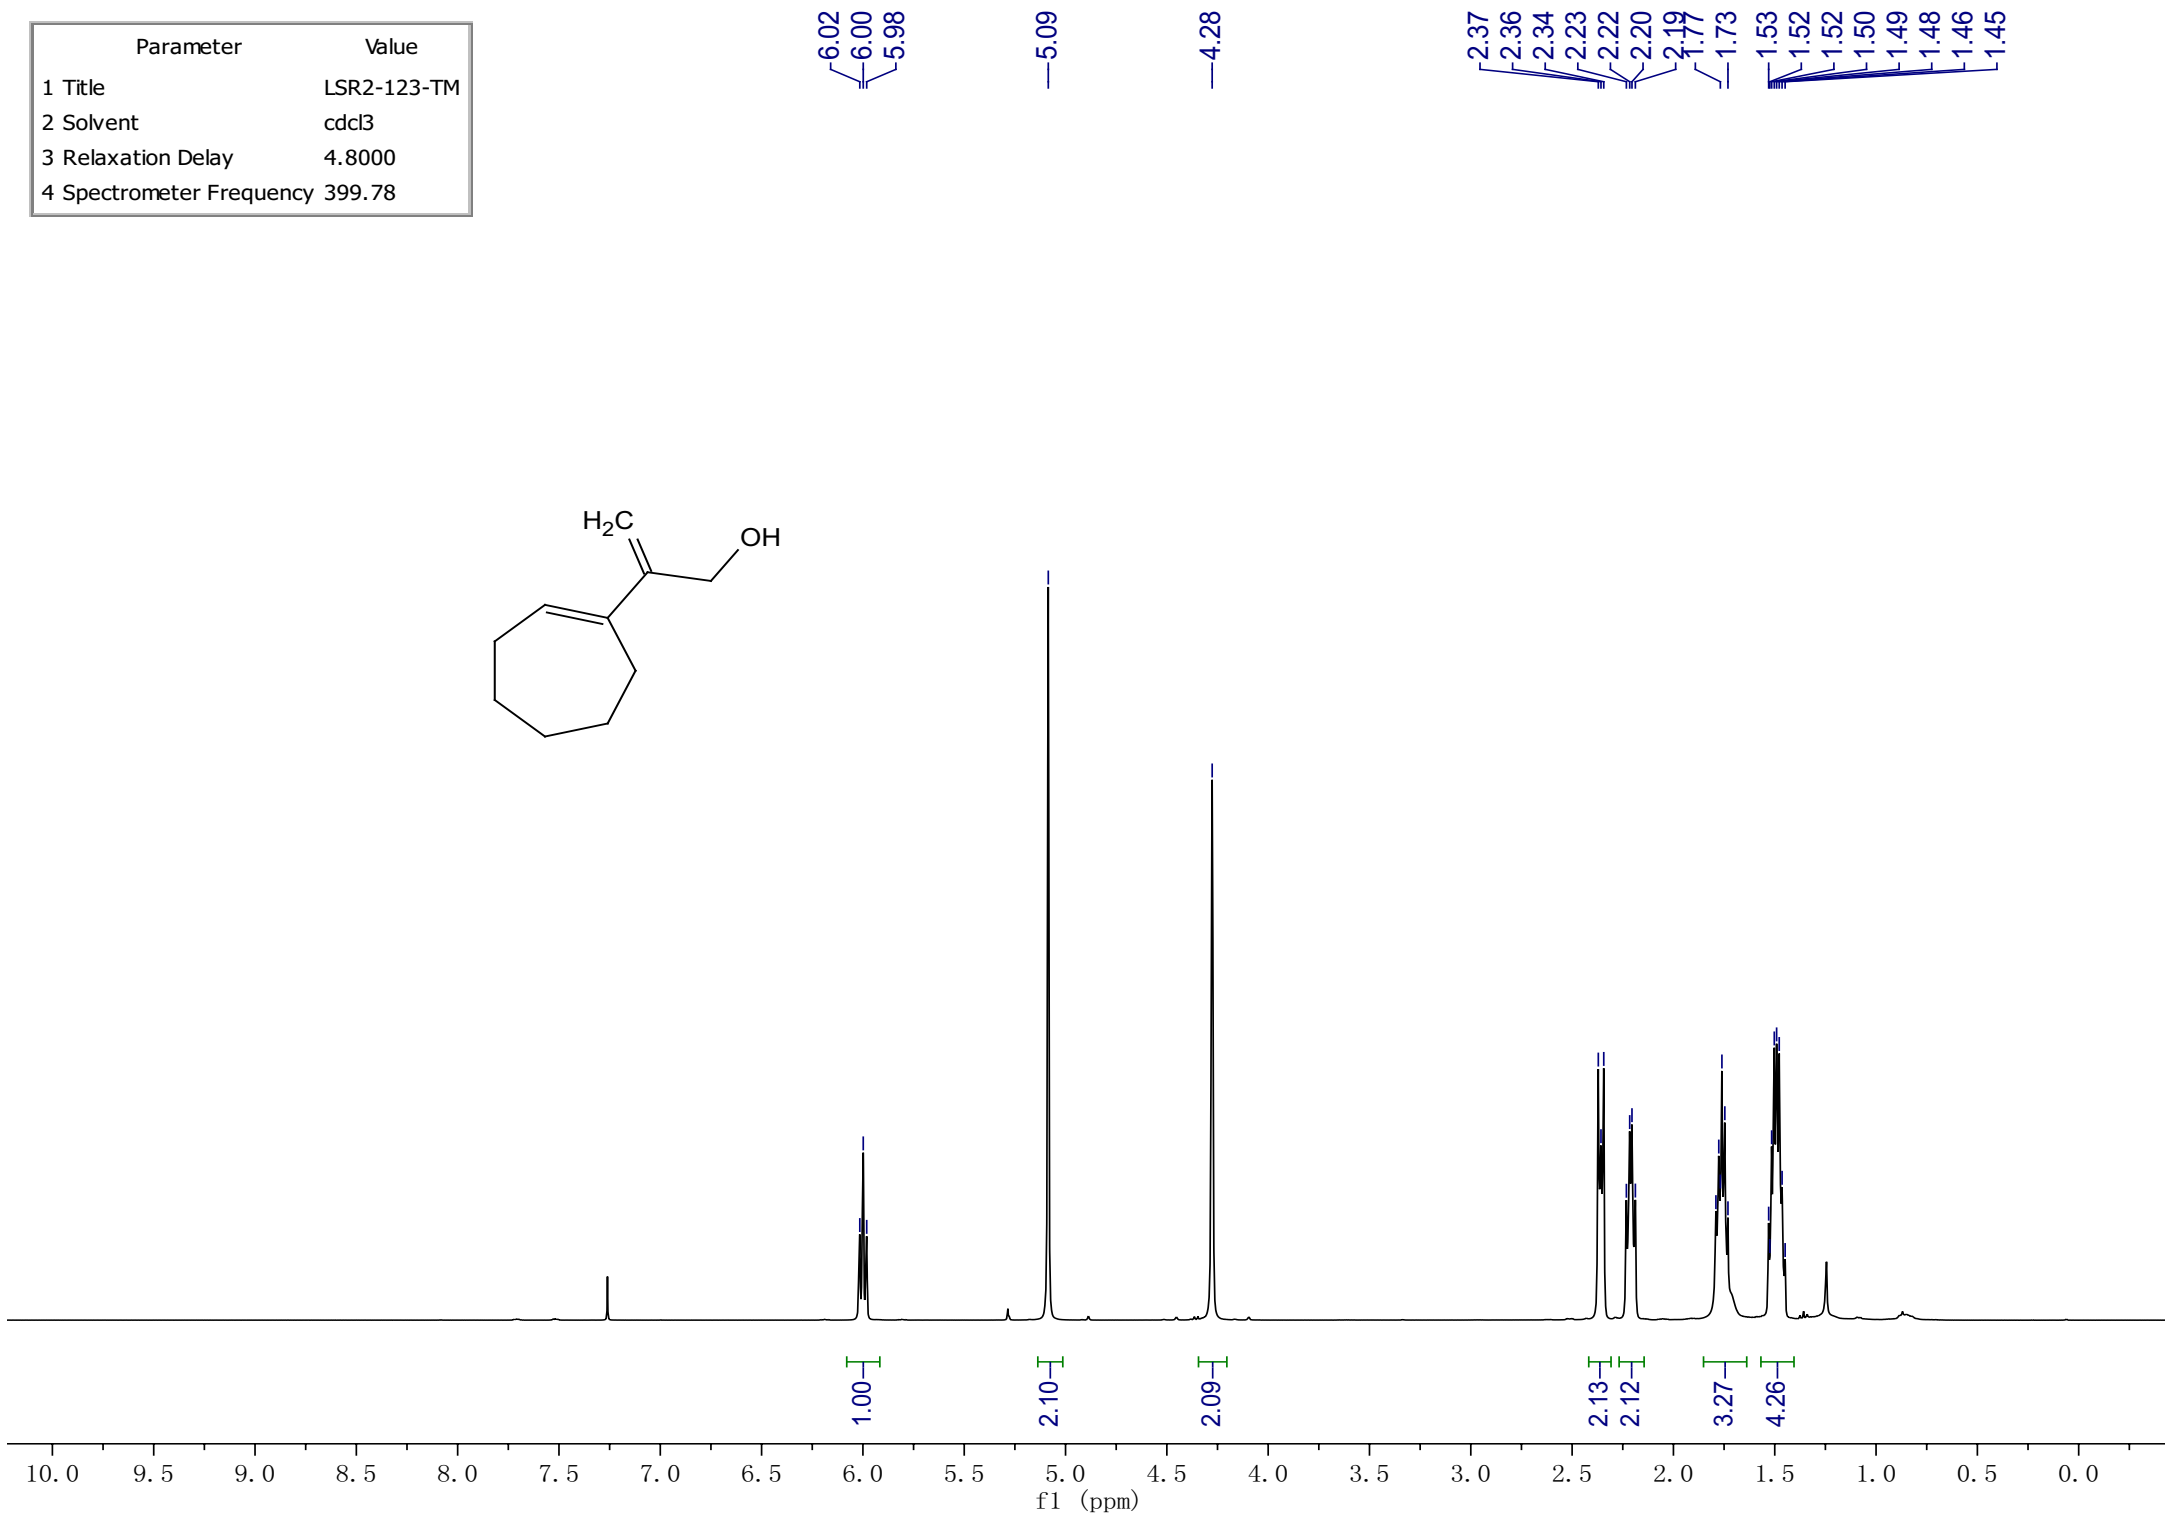

| Parameter                | Value         |
|--------------------------|---------------|
| 1 Title                  | LSR2-123-TM-C |
| 2 Solvent                | cdcl3         |
| 3 Relaxation Delay       | 1.0000        |
| 4 Spectrometer Frequency | 100.53        |

—148.76 —142.32 —129.31 —109.78 —64.41  
32.34 29.80 28.35 26.53 26.30

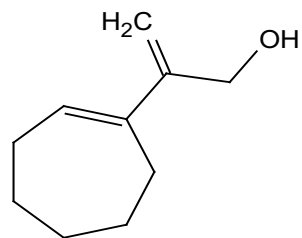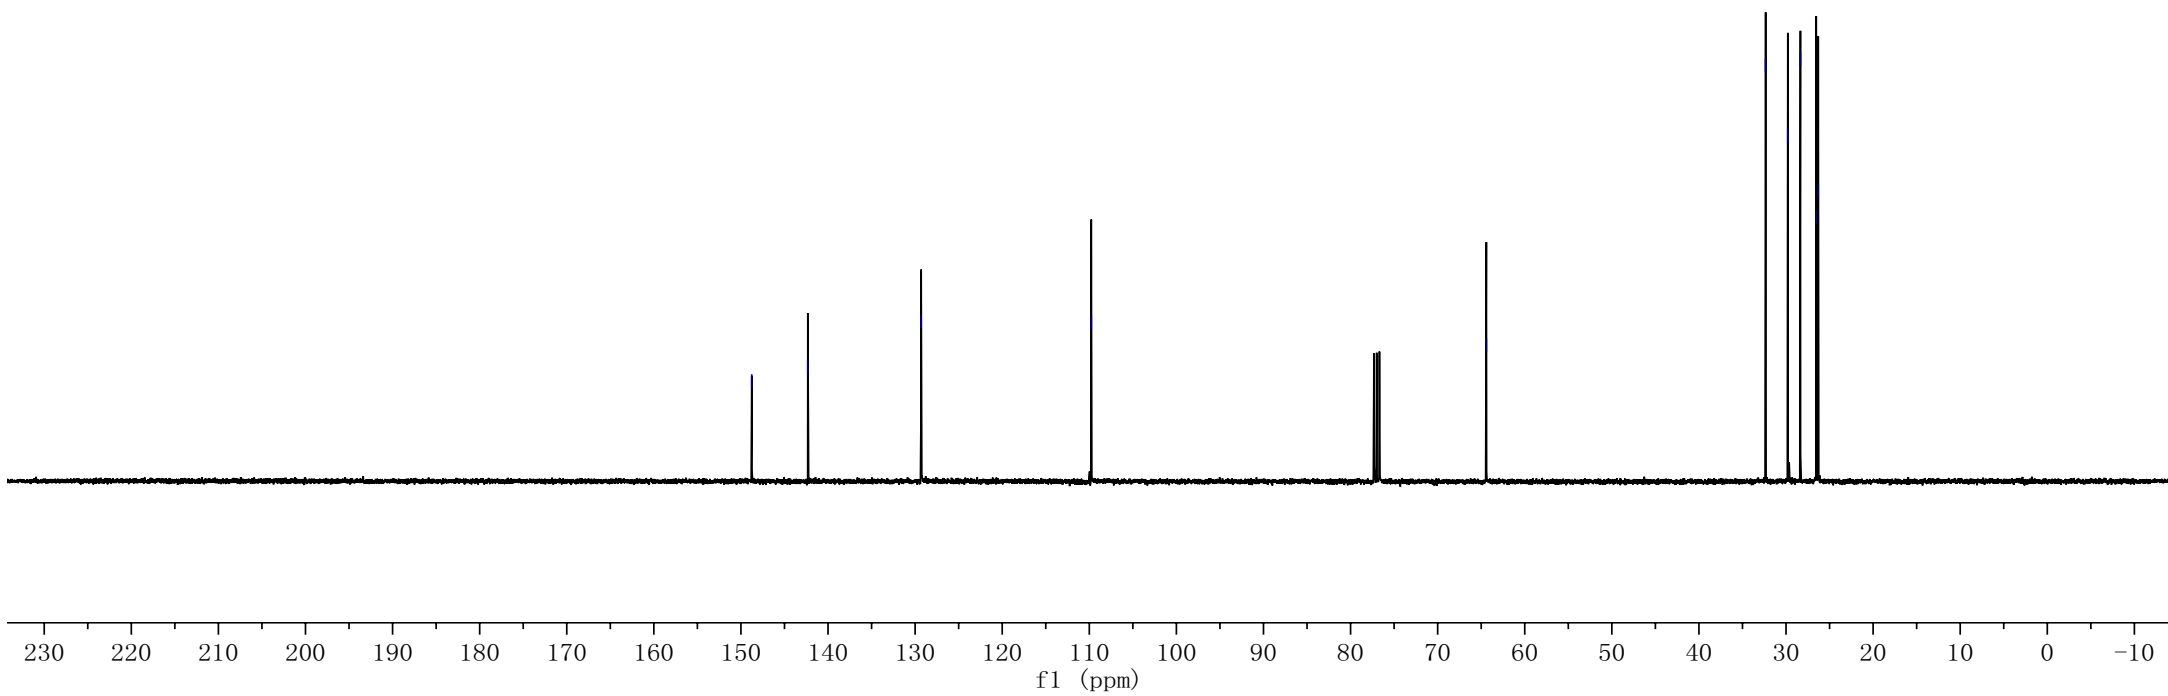

| Parameter                | Value       |
|--------------------------|-------------|
| 1 Title                  | LSR2-73-TM1 |
| 2 Solvent                | cdcl3       |
| 3 Relaxation Delay       | 4.8000      |
| 4 Spectrometer Frequency | 399.78      |

5.64  
5.62  
5.61

5.13  
5.11

4.33

2.16  
2.14  
2.12  
2.10

1.68

1.35  
1.25

0.89  
0.88  
0.86

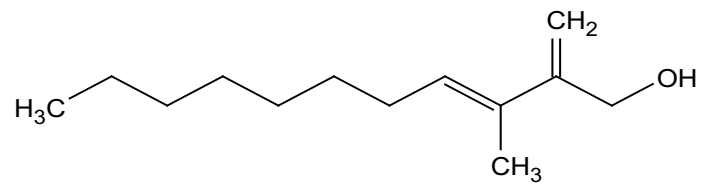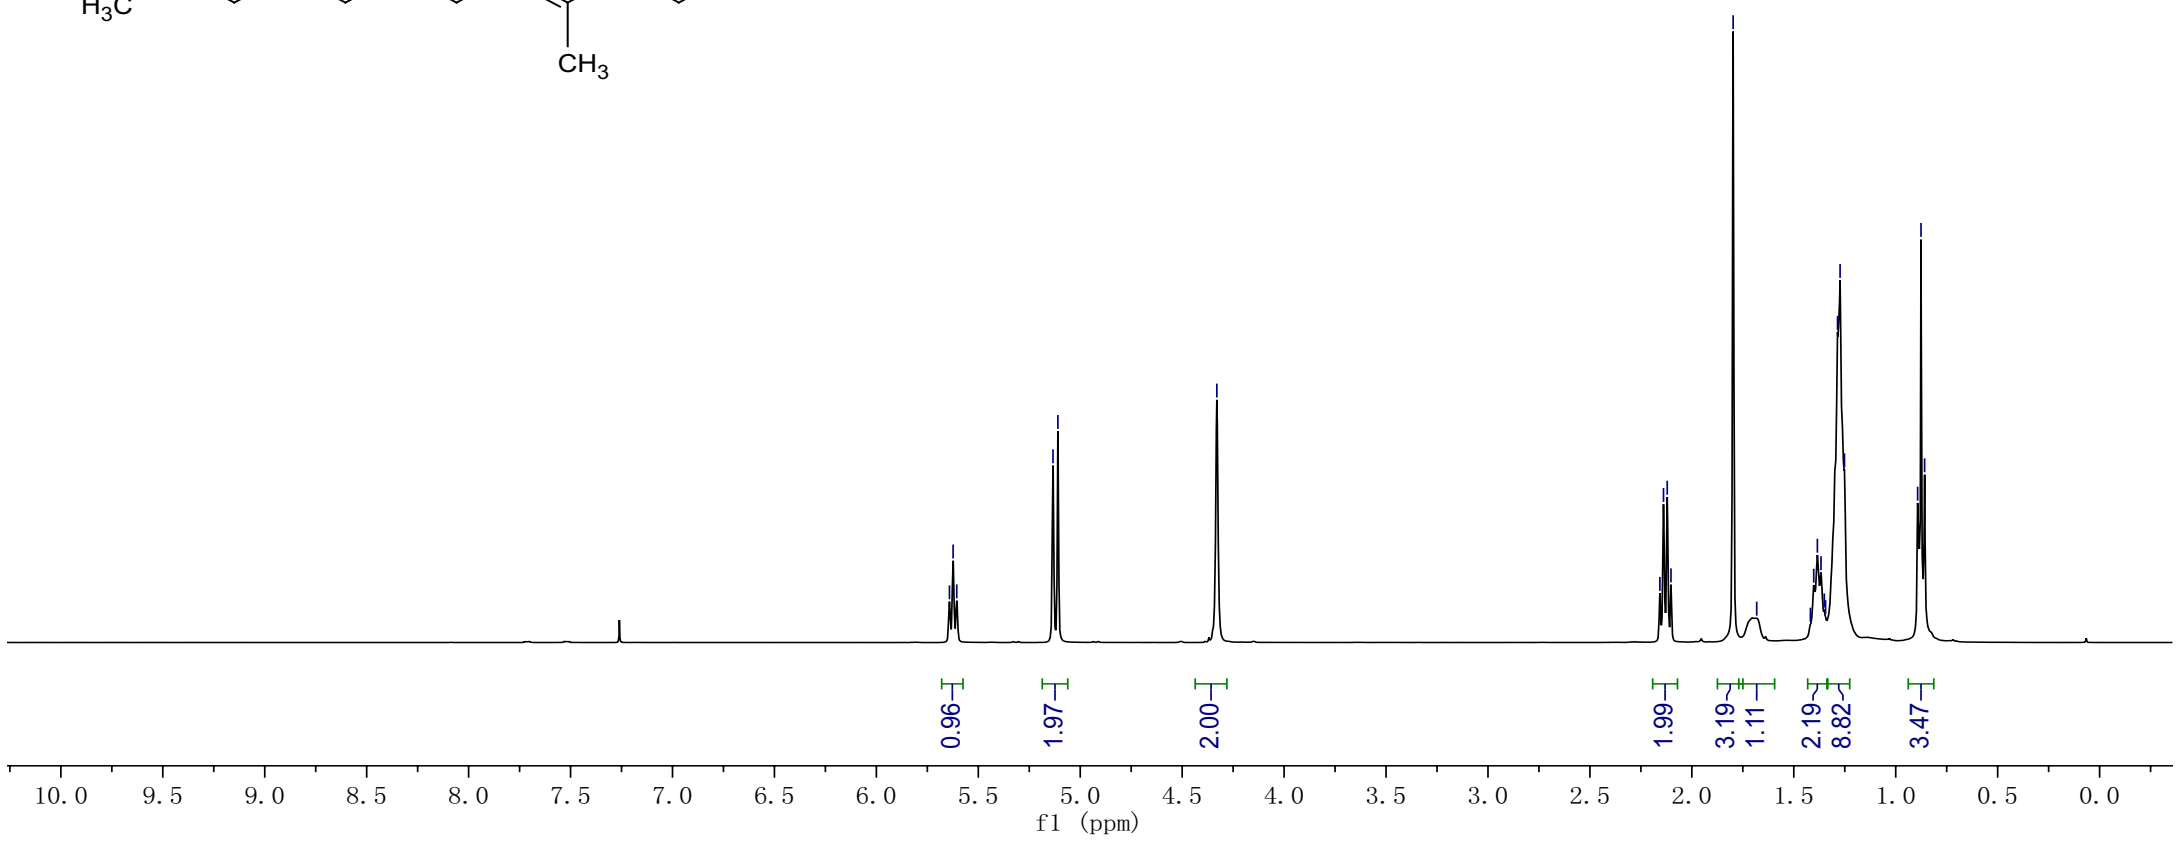

| Parameter                | Value         |
|--------------------------|---------------|
| 1 Title                  | LSR2-73-TM1-C |
| 2 Solvent                | cdcl3         |
| 3 Relaxation Delay       | 1.0000        |
| 4 Spectrometer Frequency | 100.53        |

—148.31

—132.06  
—128.45

—110.65

—64.29

31.81  
29.54  
29.36  
29.17  
28.50

—22.63

14.09  
14.05

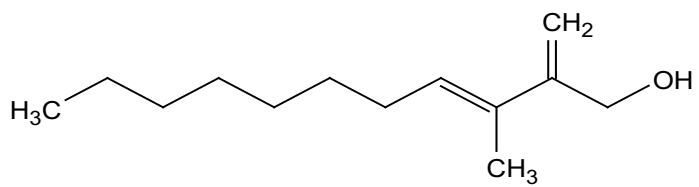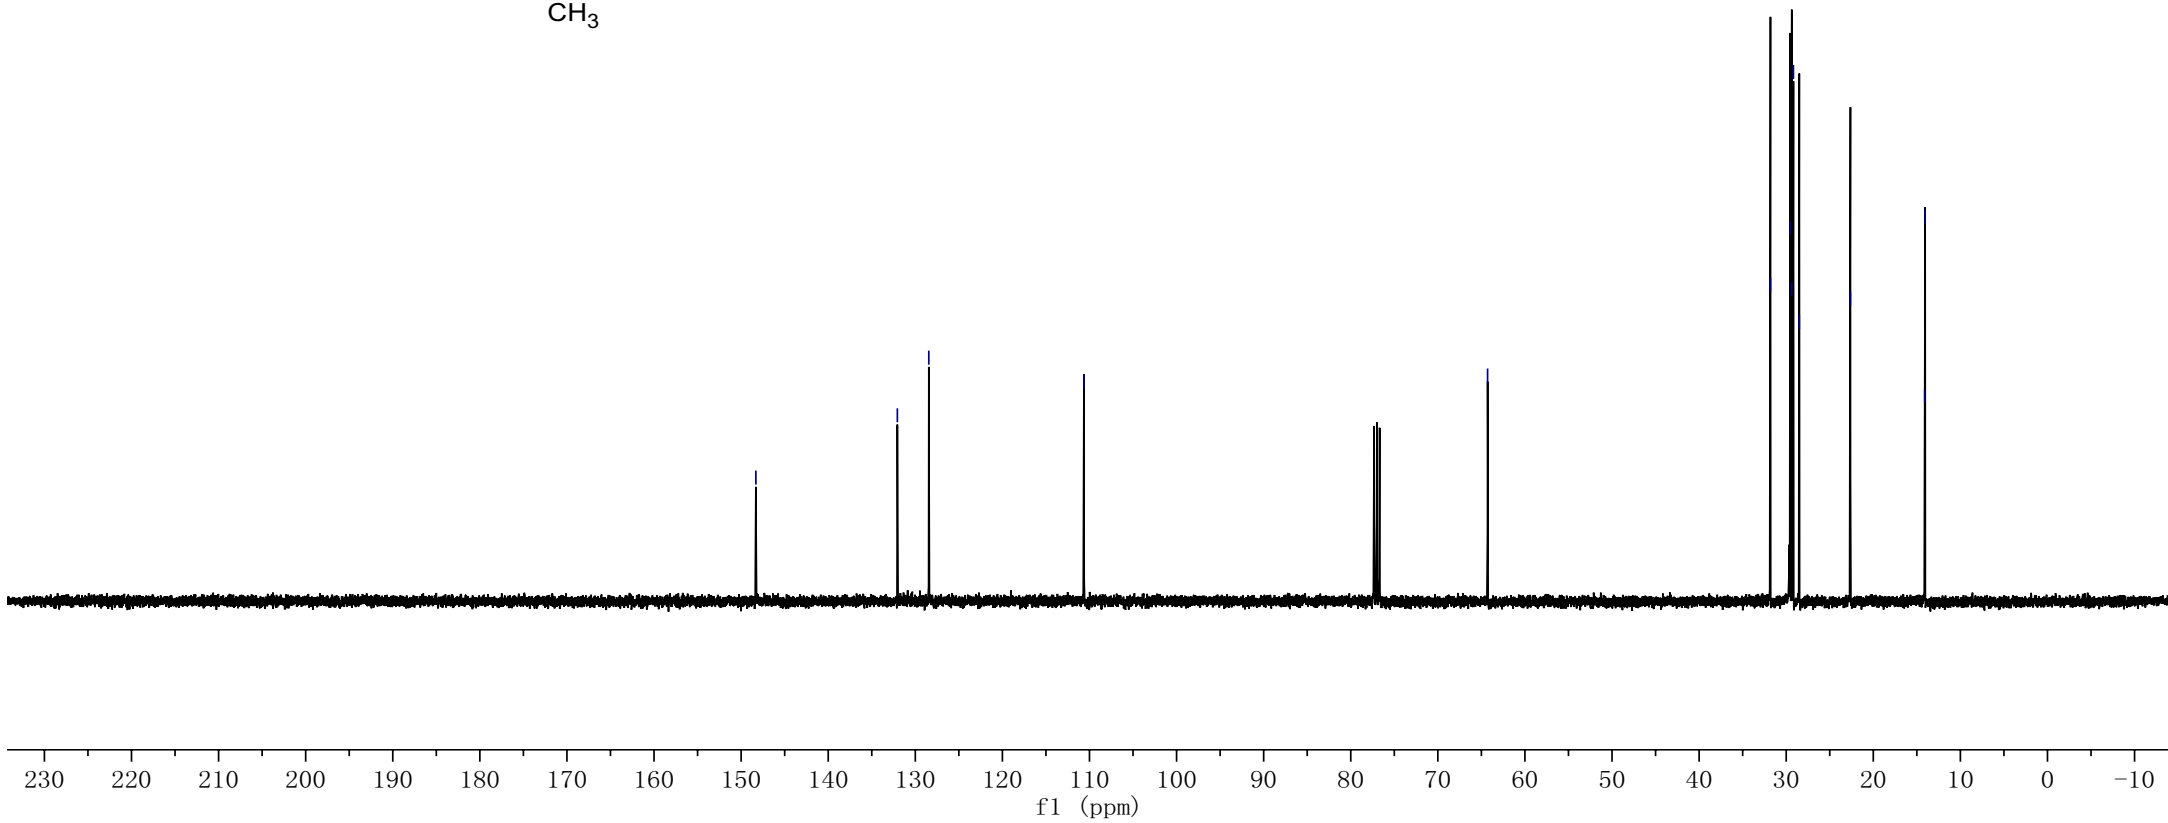

| Parameter                | Value        |
|--------------------------|--------------|
| 1 Title                  | LSR1-282-1-3 |
| 2 Solvent                | cdcl3        |
| 3 Relaxation Delay       | 4.8000       |
| 4 Spectrometer Frequency | 399.78       |

6.03  
5.99  
5.85  
5.83  
5.82  
5.81  
5.79  
5.78

5.08  
5.01

4.37

2.10  
2.08  
2.06  
2.04  
1.46  
1.41  
1.32  
0.95  
0.93  
0.92  
0.91  
0.90  
0.88

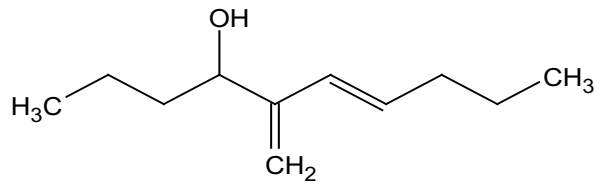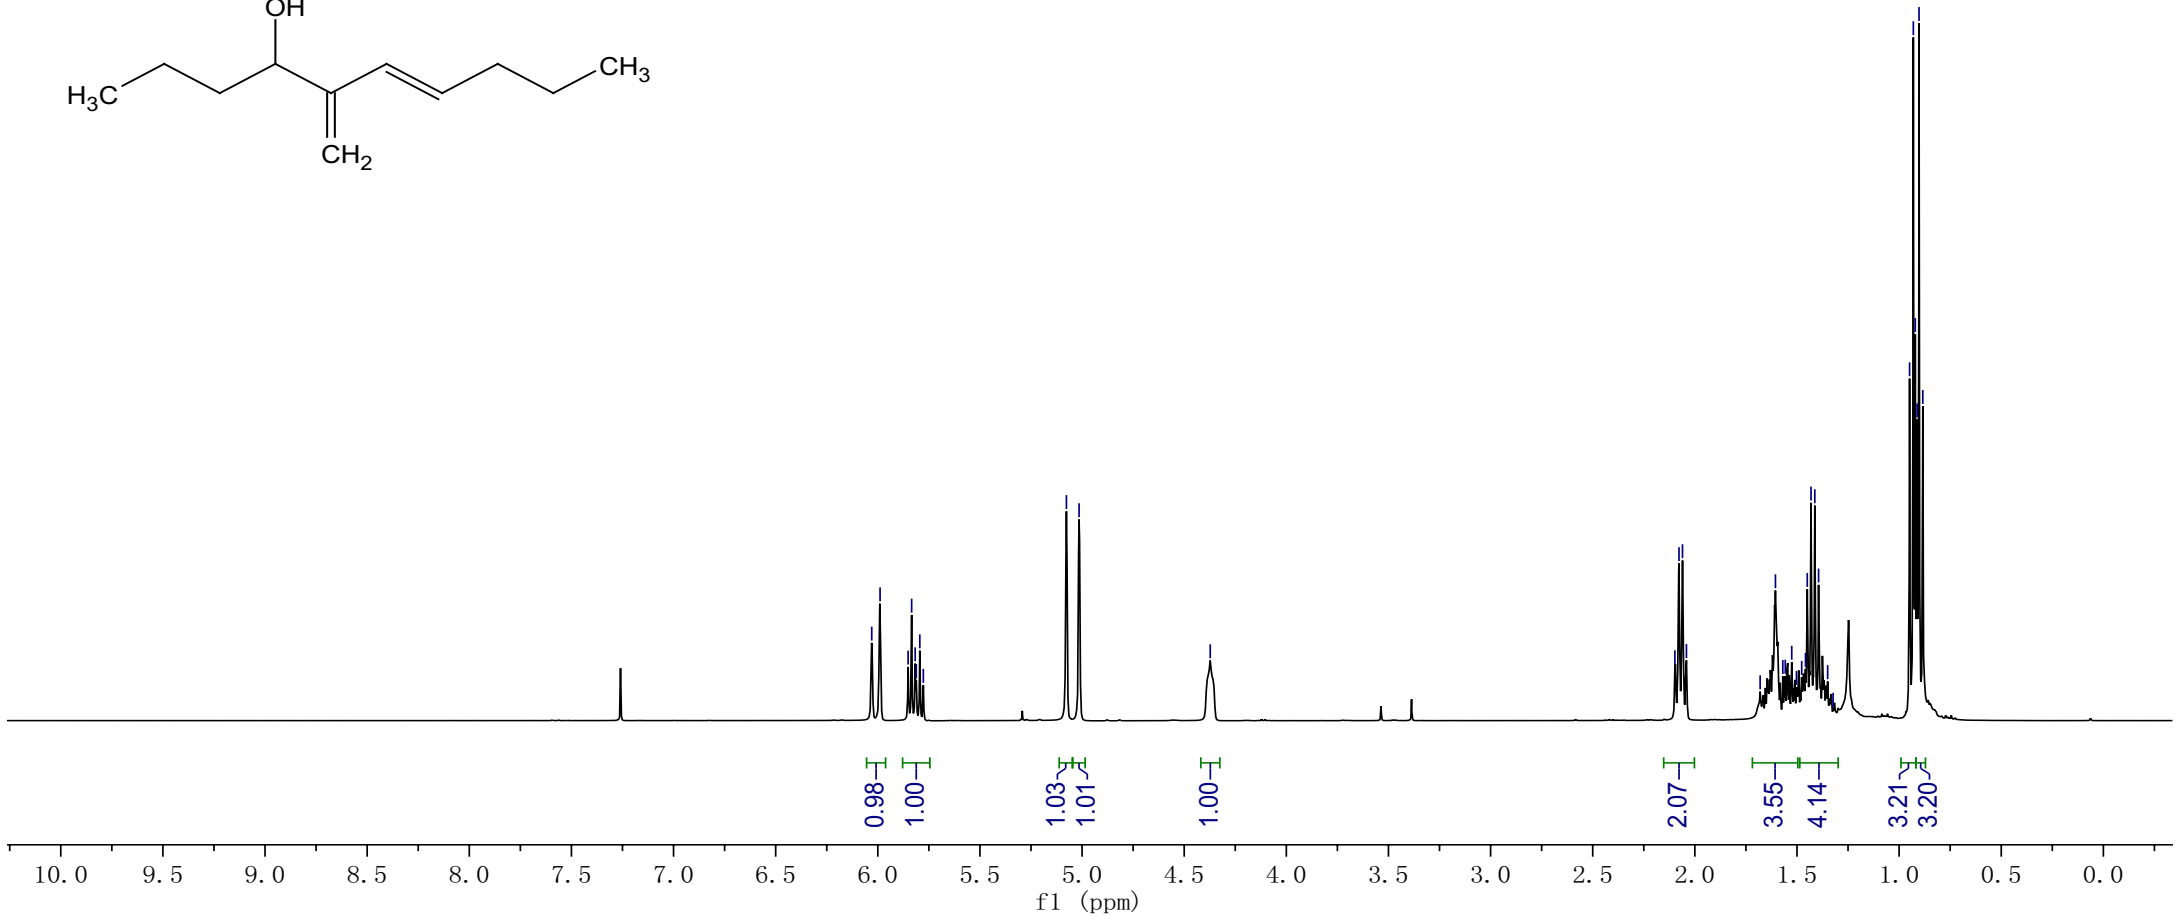

| Parameter                | Value         |
|--------------------------|---------------|
| 1 Title                  | LSR1-282-1-3C |
| 2 Solvent                | cdcl3         |
| 3 Relaxation Delay       | 1.0000        |
| 4 Spectrometer Frequency | 100.53        |

—149.22

~131.12  
~129.17

—111.35

—71.93

~38.53  
~35.18

~22.43  
—19.02

~13.99  
~13.68

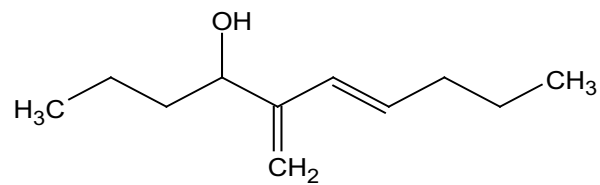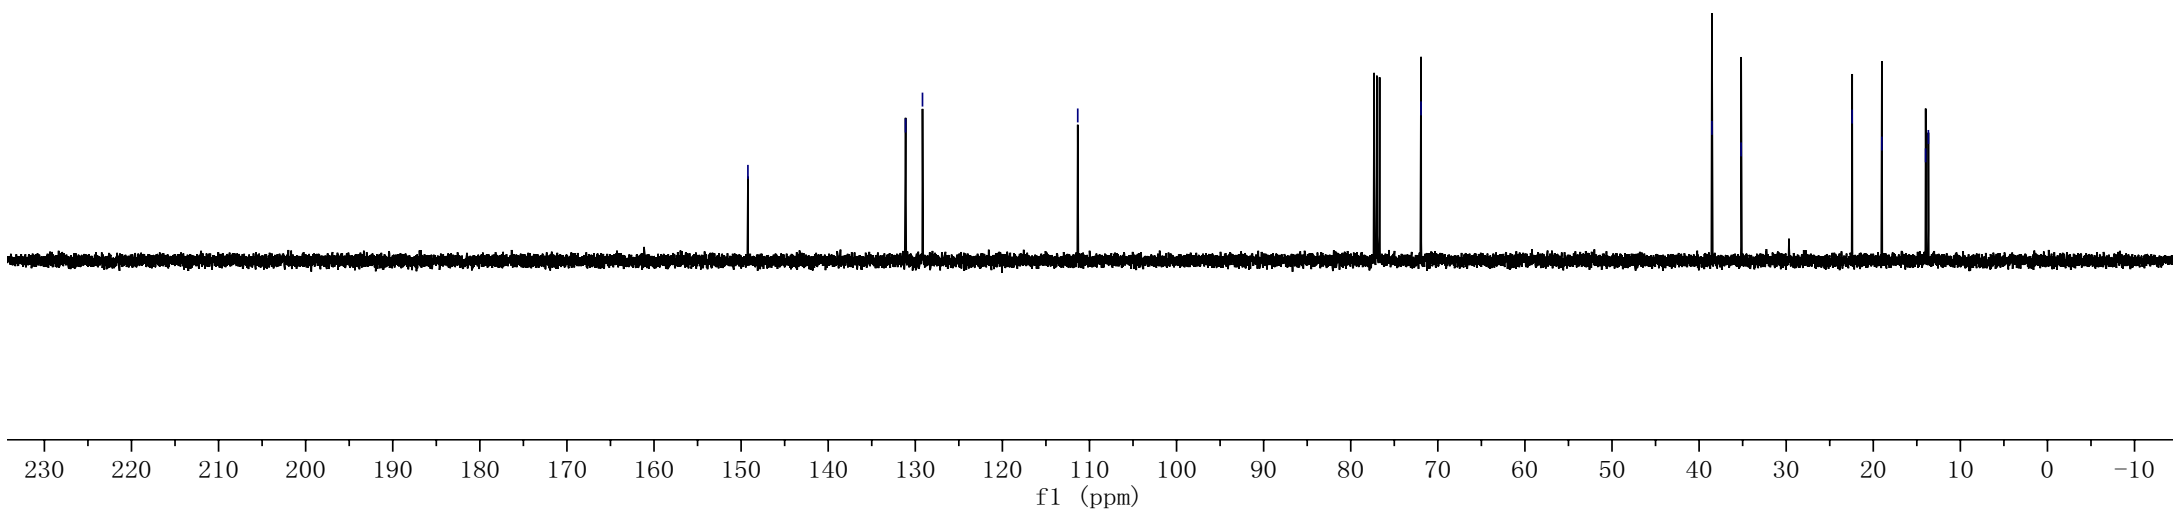



| Parameter                | Value      |
|--------------------------|------------|
| 1 Title                  | LSR1-295-2 |
| 2 Solvent                | CDCl3      |
| 3 Relaxation Delay       | 4.8000     |
| 4 Spectrometer Frequency | 499.86     |

6.04  
6.01  
5.83  
5.81  
5.79  
5.12  
4.99  
4.58  
4.57  
4.56  
4.54

2.11  
2.10  
2.09  
2.07  
1.63  
1.60  
1.36  
0.89  
0.88  
0.87

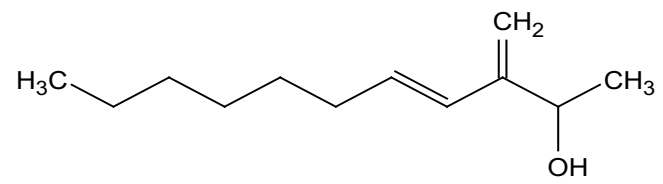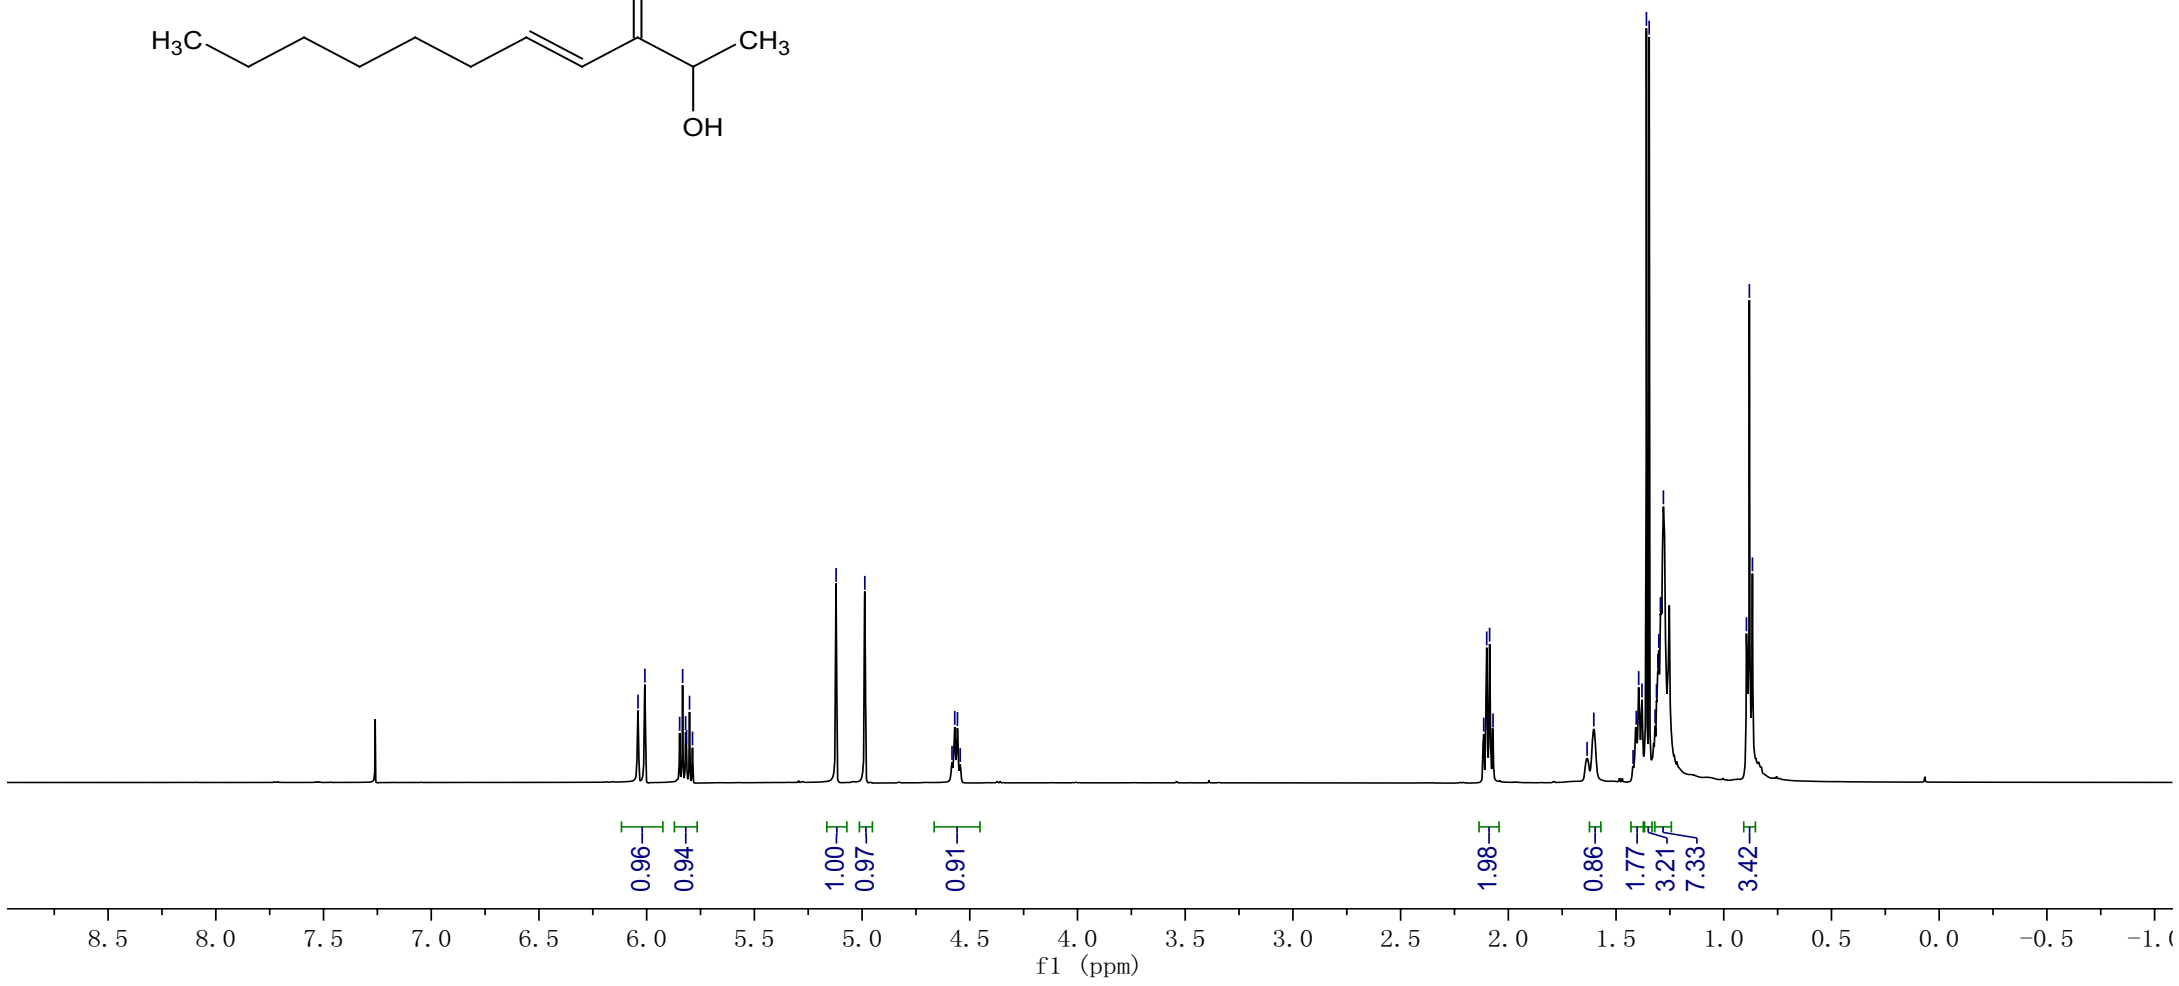

| Parameter                | Value       |
|--------------------------|-------------|
| 1 Title                  | LSR1-295-2C |
| 2 Solvent                | CDCl3       |
| 3 Relaxation Delay       | 1.0000      |
| 4 Spectrometer Frequency | 125.70      |

—150.30

~131.44  
~129.10

—110.61

—67.77

33.13  
31.69  
29.24  
28.87

22.81  
22.59  
—14.06

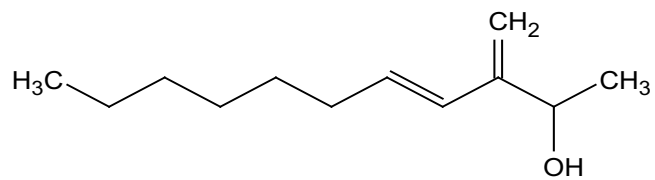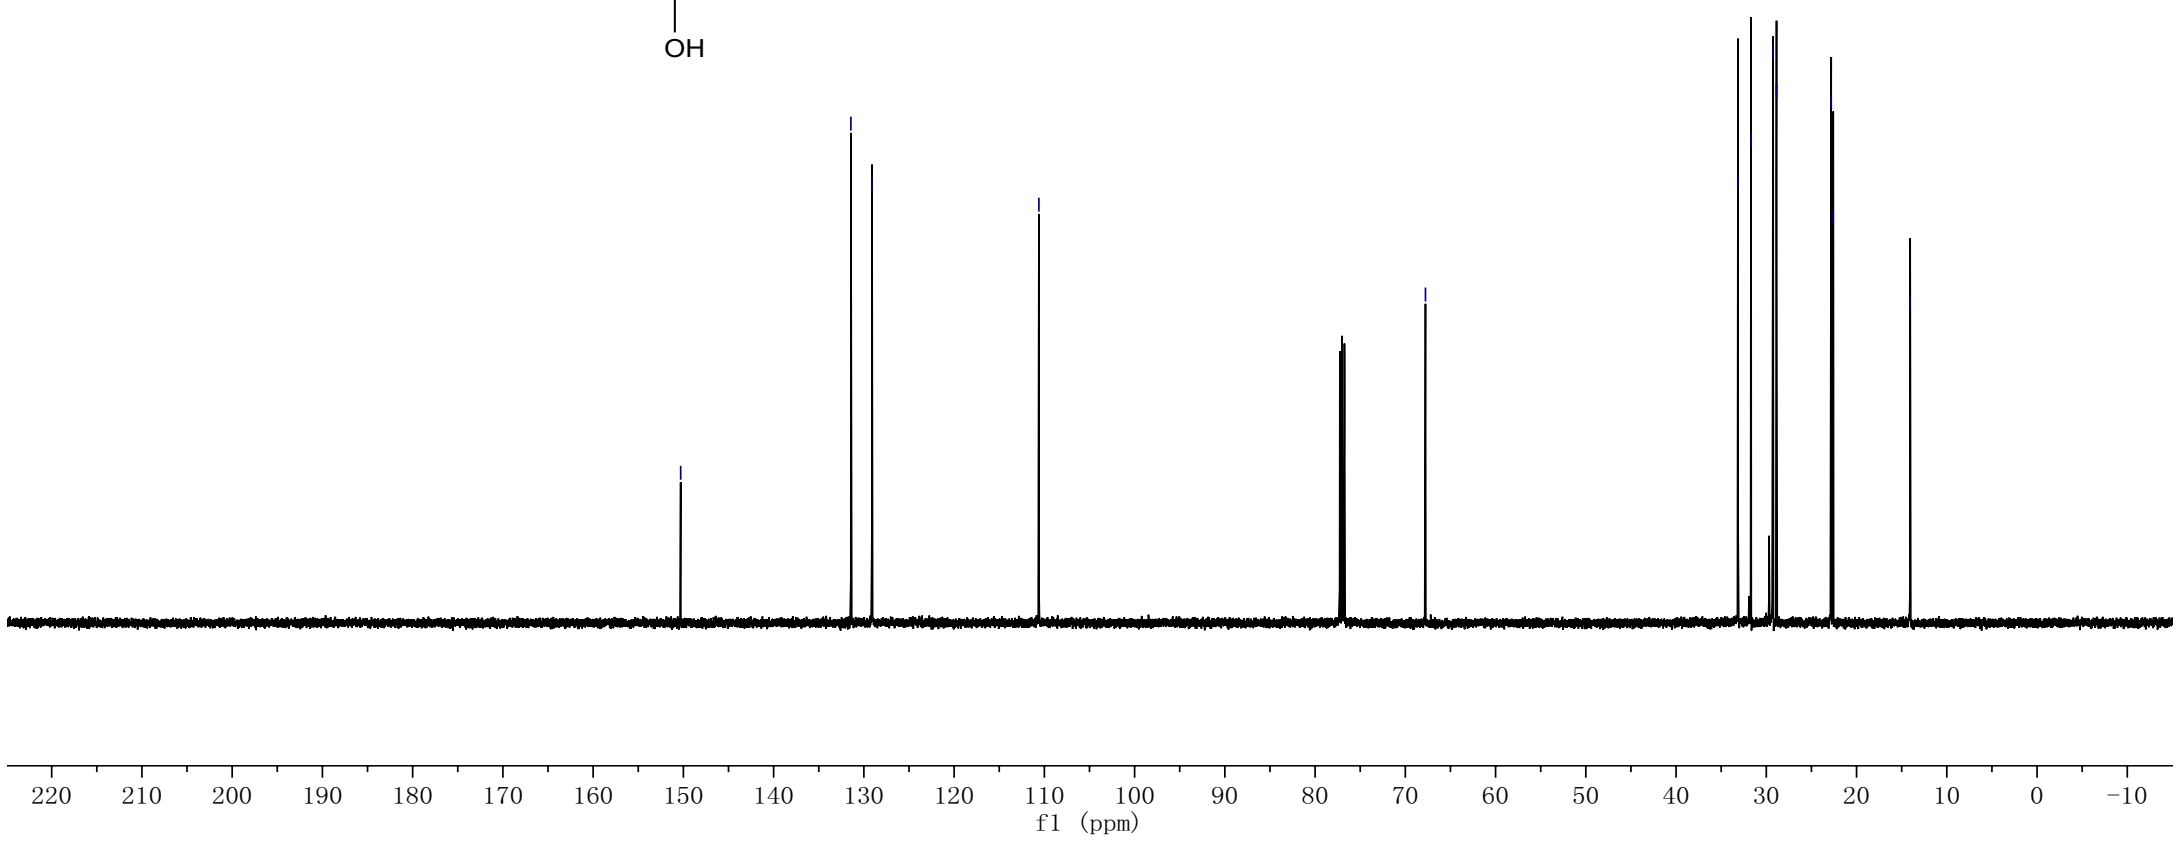

| Parameter                | Value        |
|--------------------------|--------------|
| 1 Title                  | LSR2-135-TM3 |
| 2 Solvent                | cdc13        |
| 3 Relaxation Delay       | 4.8000       |
| 4 Spectrometer Frequency | 399.78       |

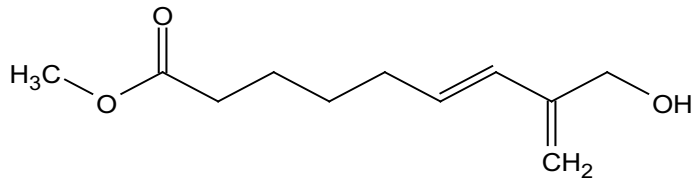

6.09 5.95 5.74 5.72 5.70 5.14 5.02 4.29 3.66 2.33 2.31 2.29 2.09 1.67 1.65 1.64 1.62 1.60 1.47 1.45 1.44 1.43 1.41 1.39 1.38

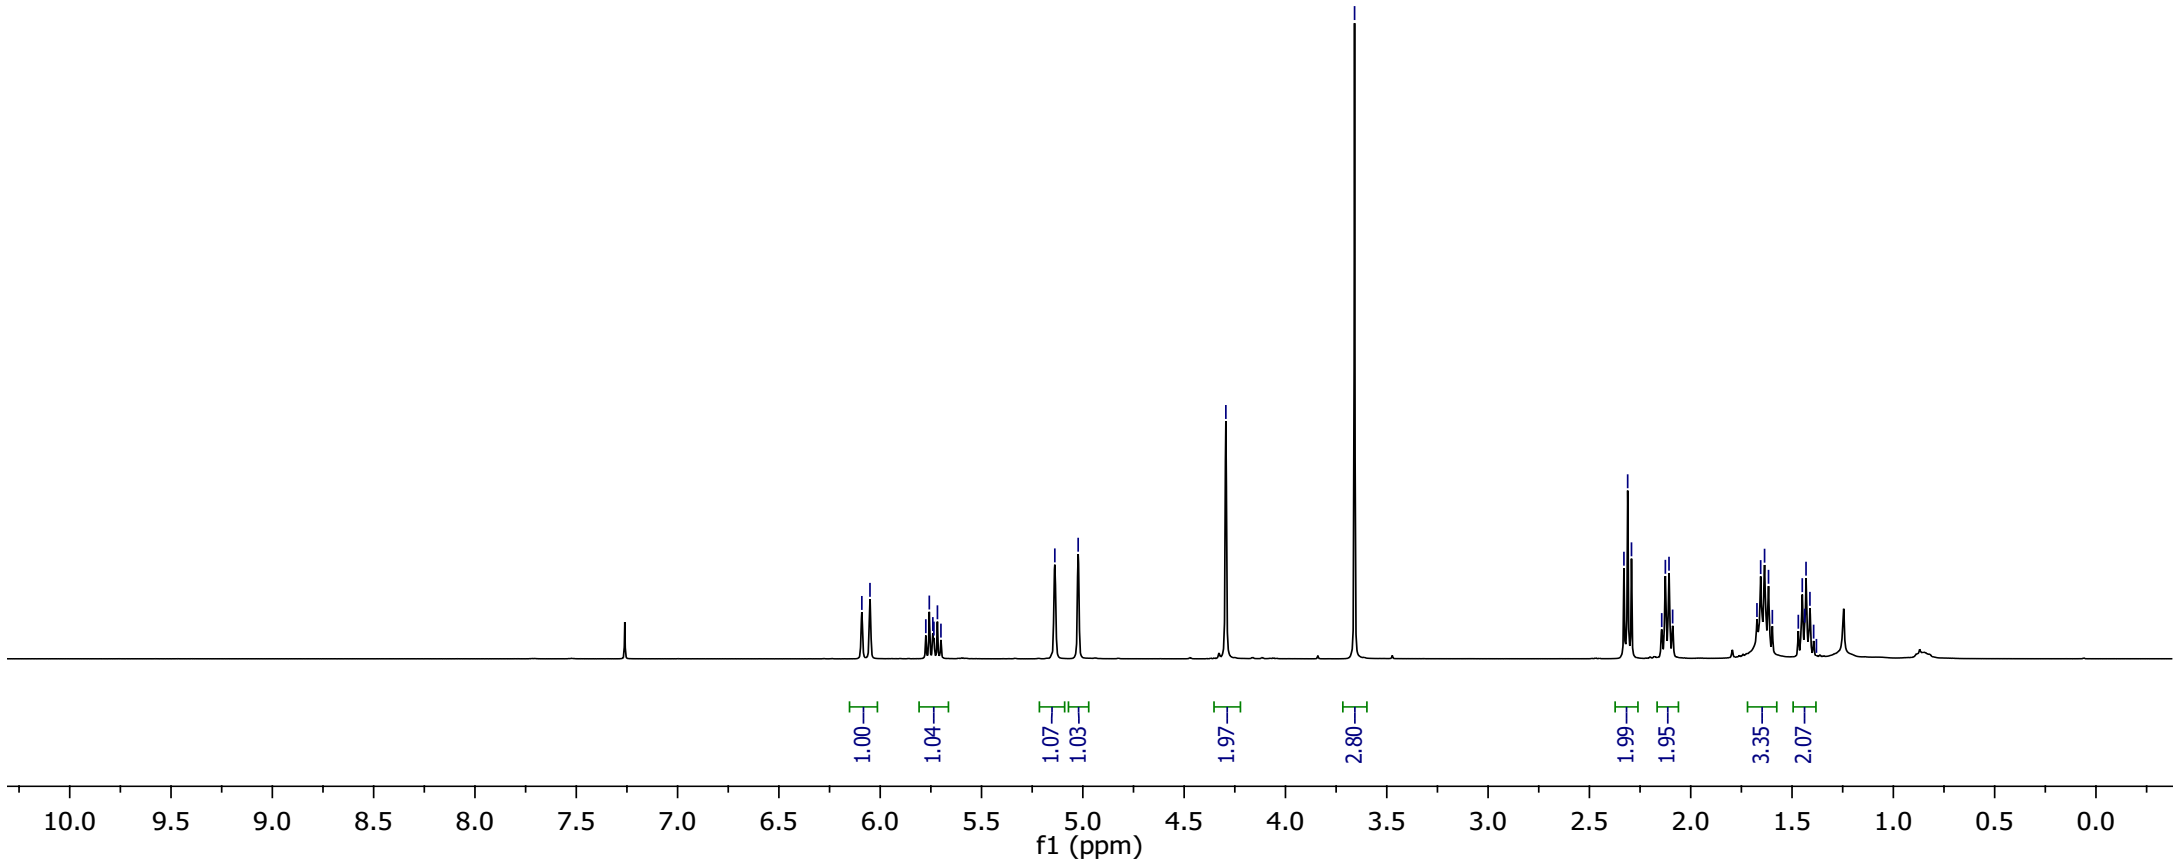

| Parameter                | Value          |
|--------------------------|----------------|
| 1 Title                  | LSR2-135-TM3-C |
| 2 Solvent                | cdcl3          |
| 3 Relaxation Delay       | 1.0000         |
| 4 Spectrometer Frequency | 100.53         |

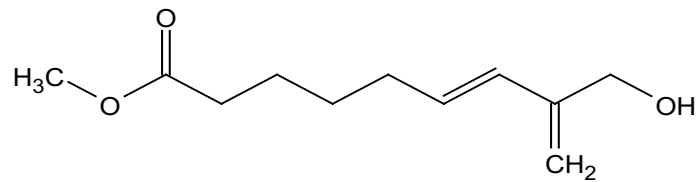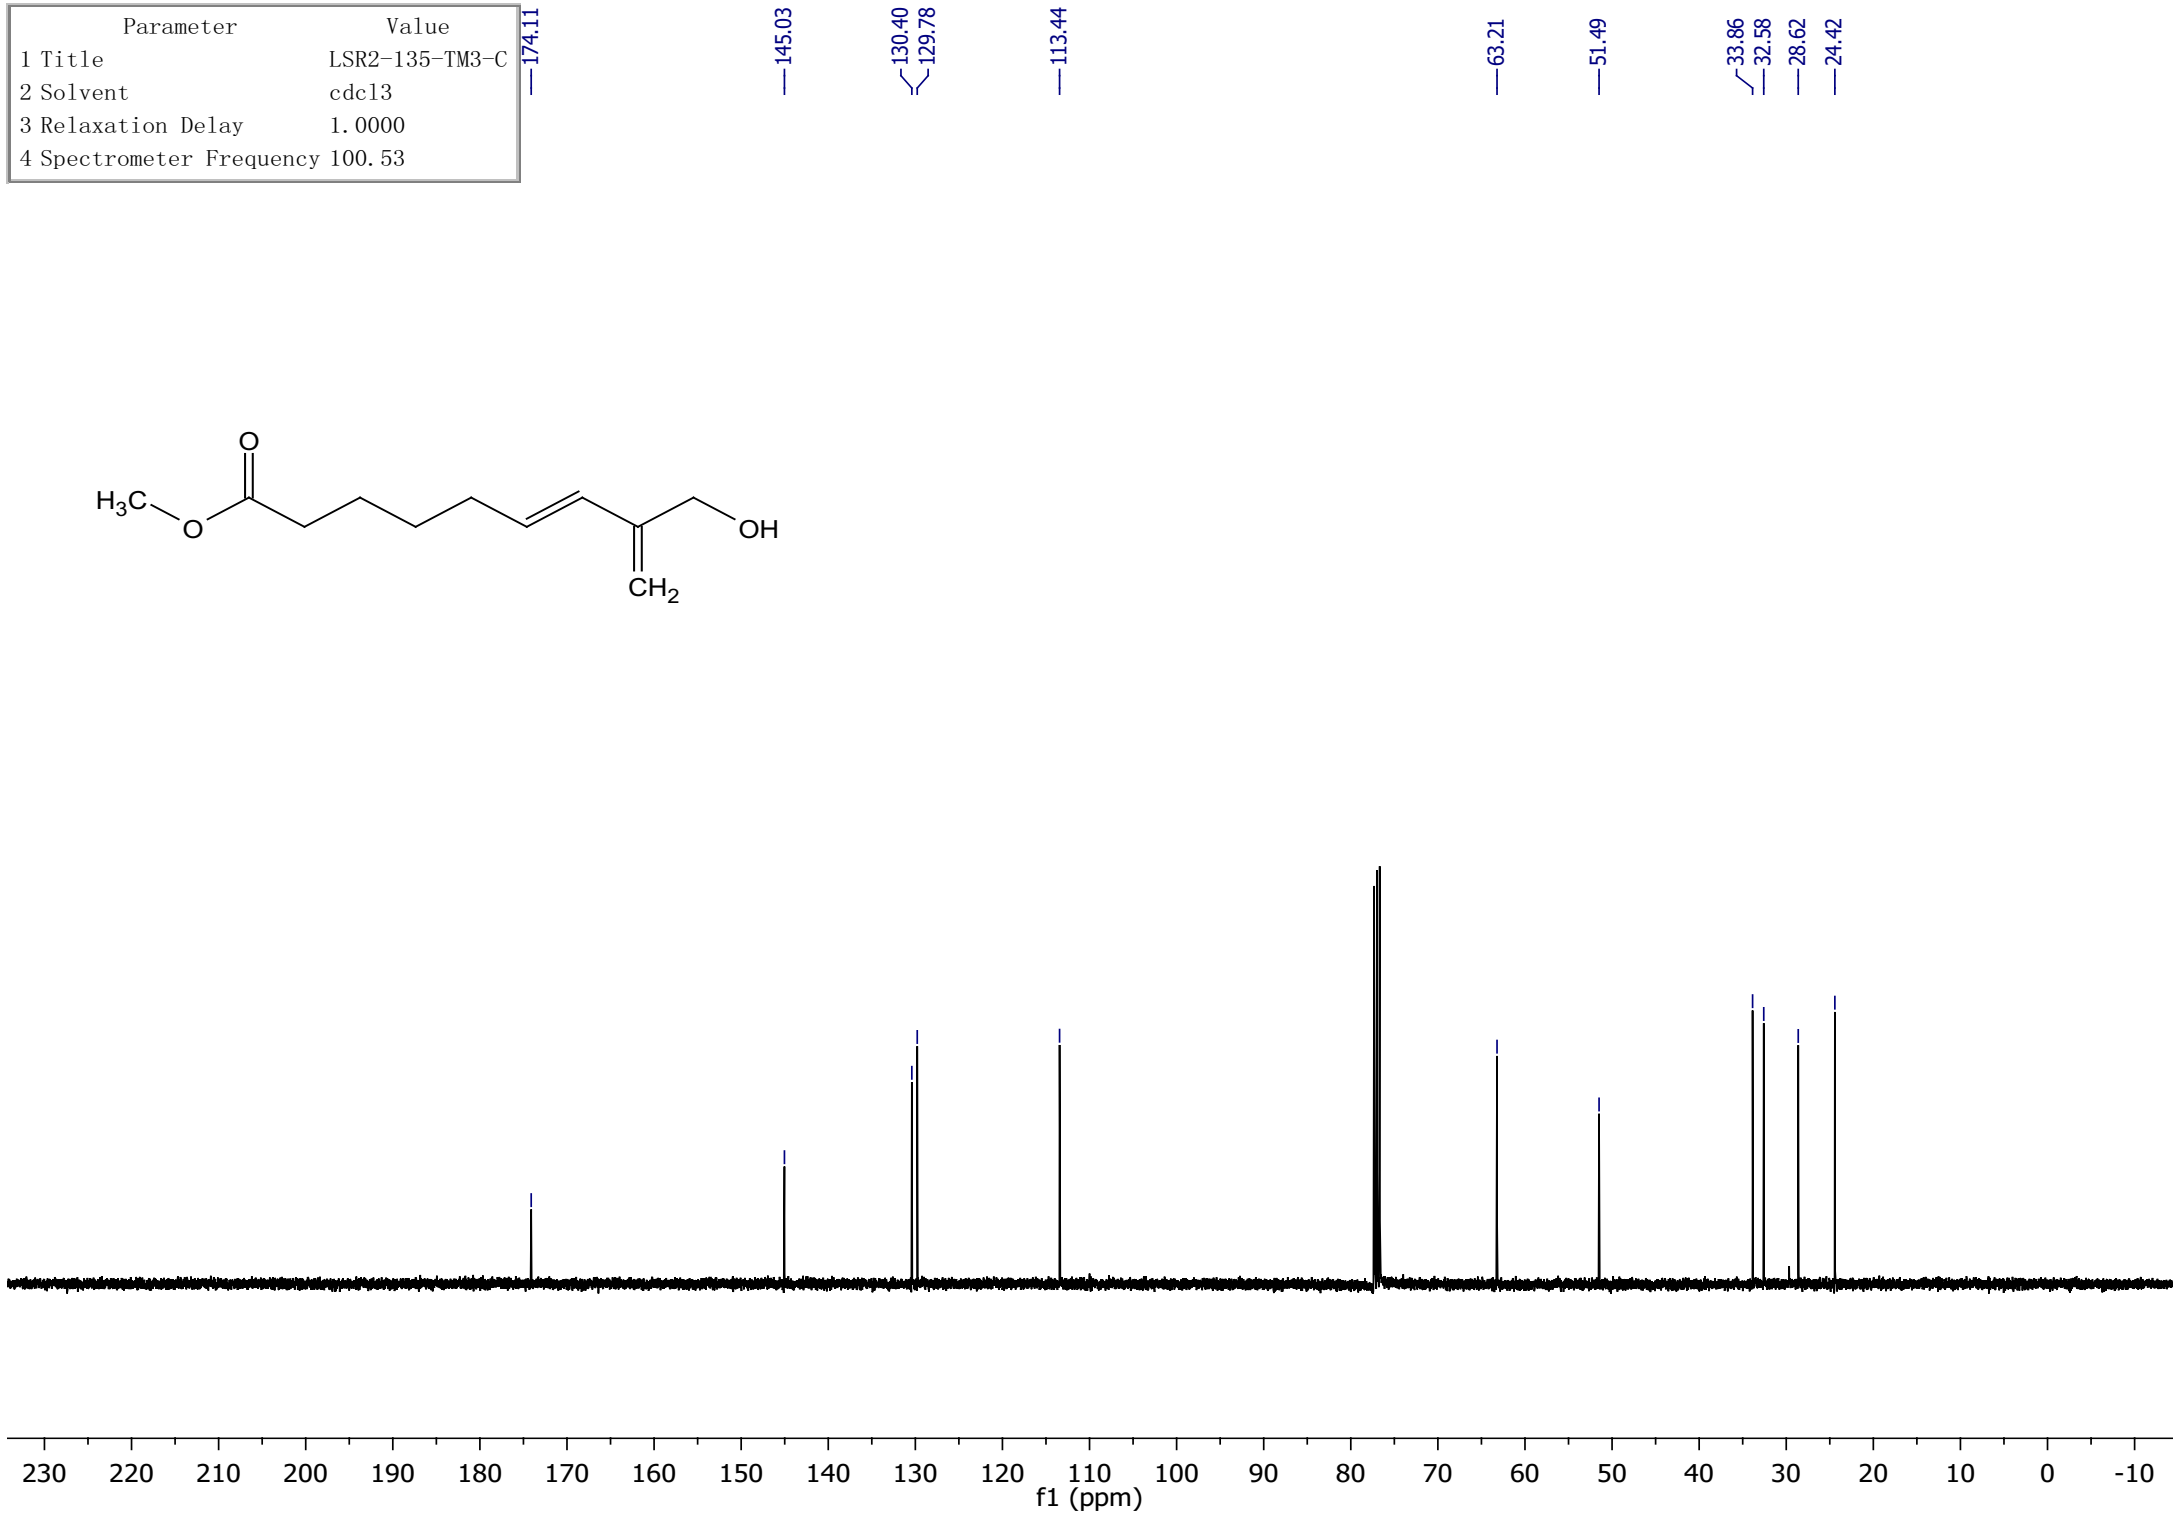

| Parameter                | Value        |
|--------------------------|--------------|
| 1 Title                  | LSR2-168-TM2 |
| 2 Solvent                | cdc13        |
| 3 Relaxation Delay       | 4.8000       |
| 4 Spectrometer Frequency | 399.78       |

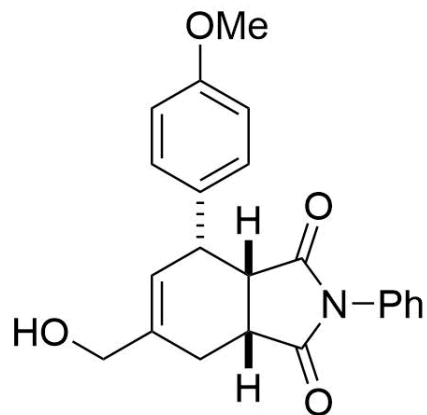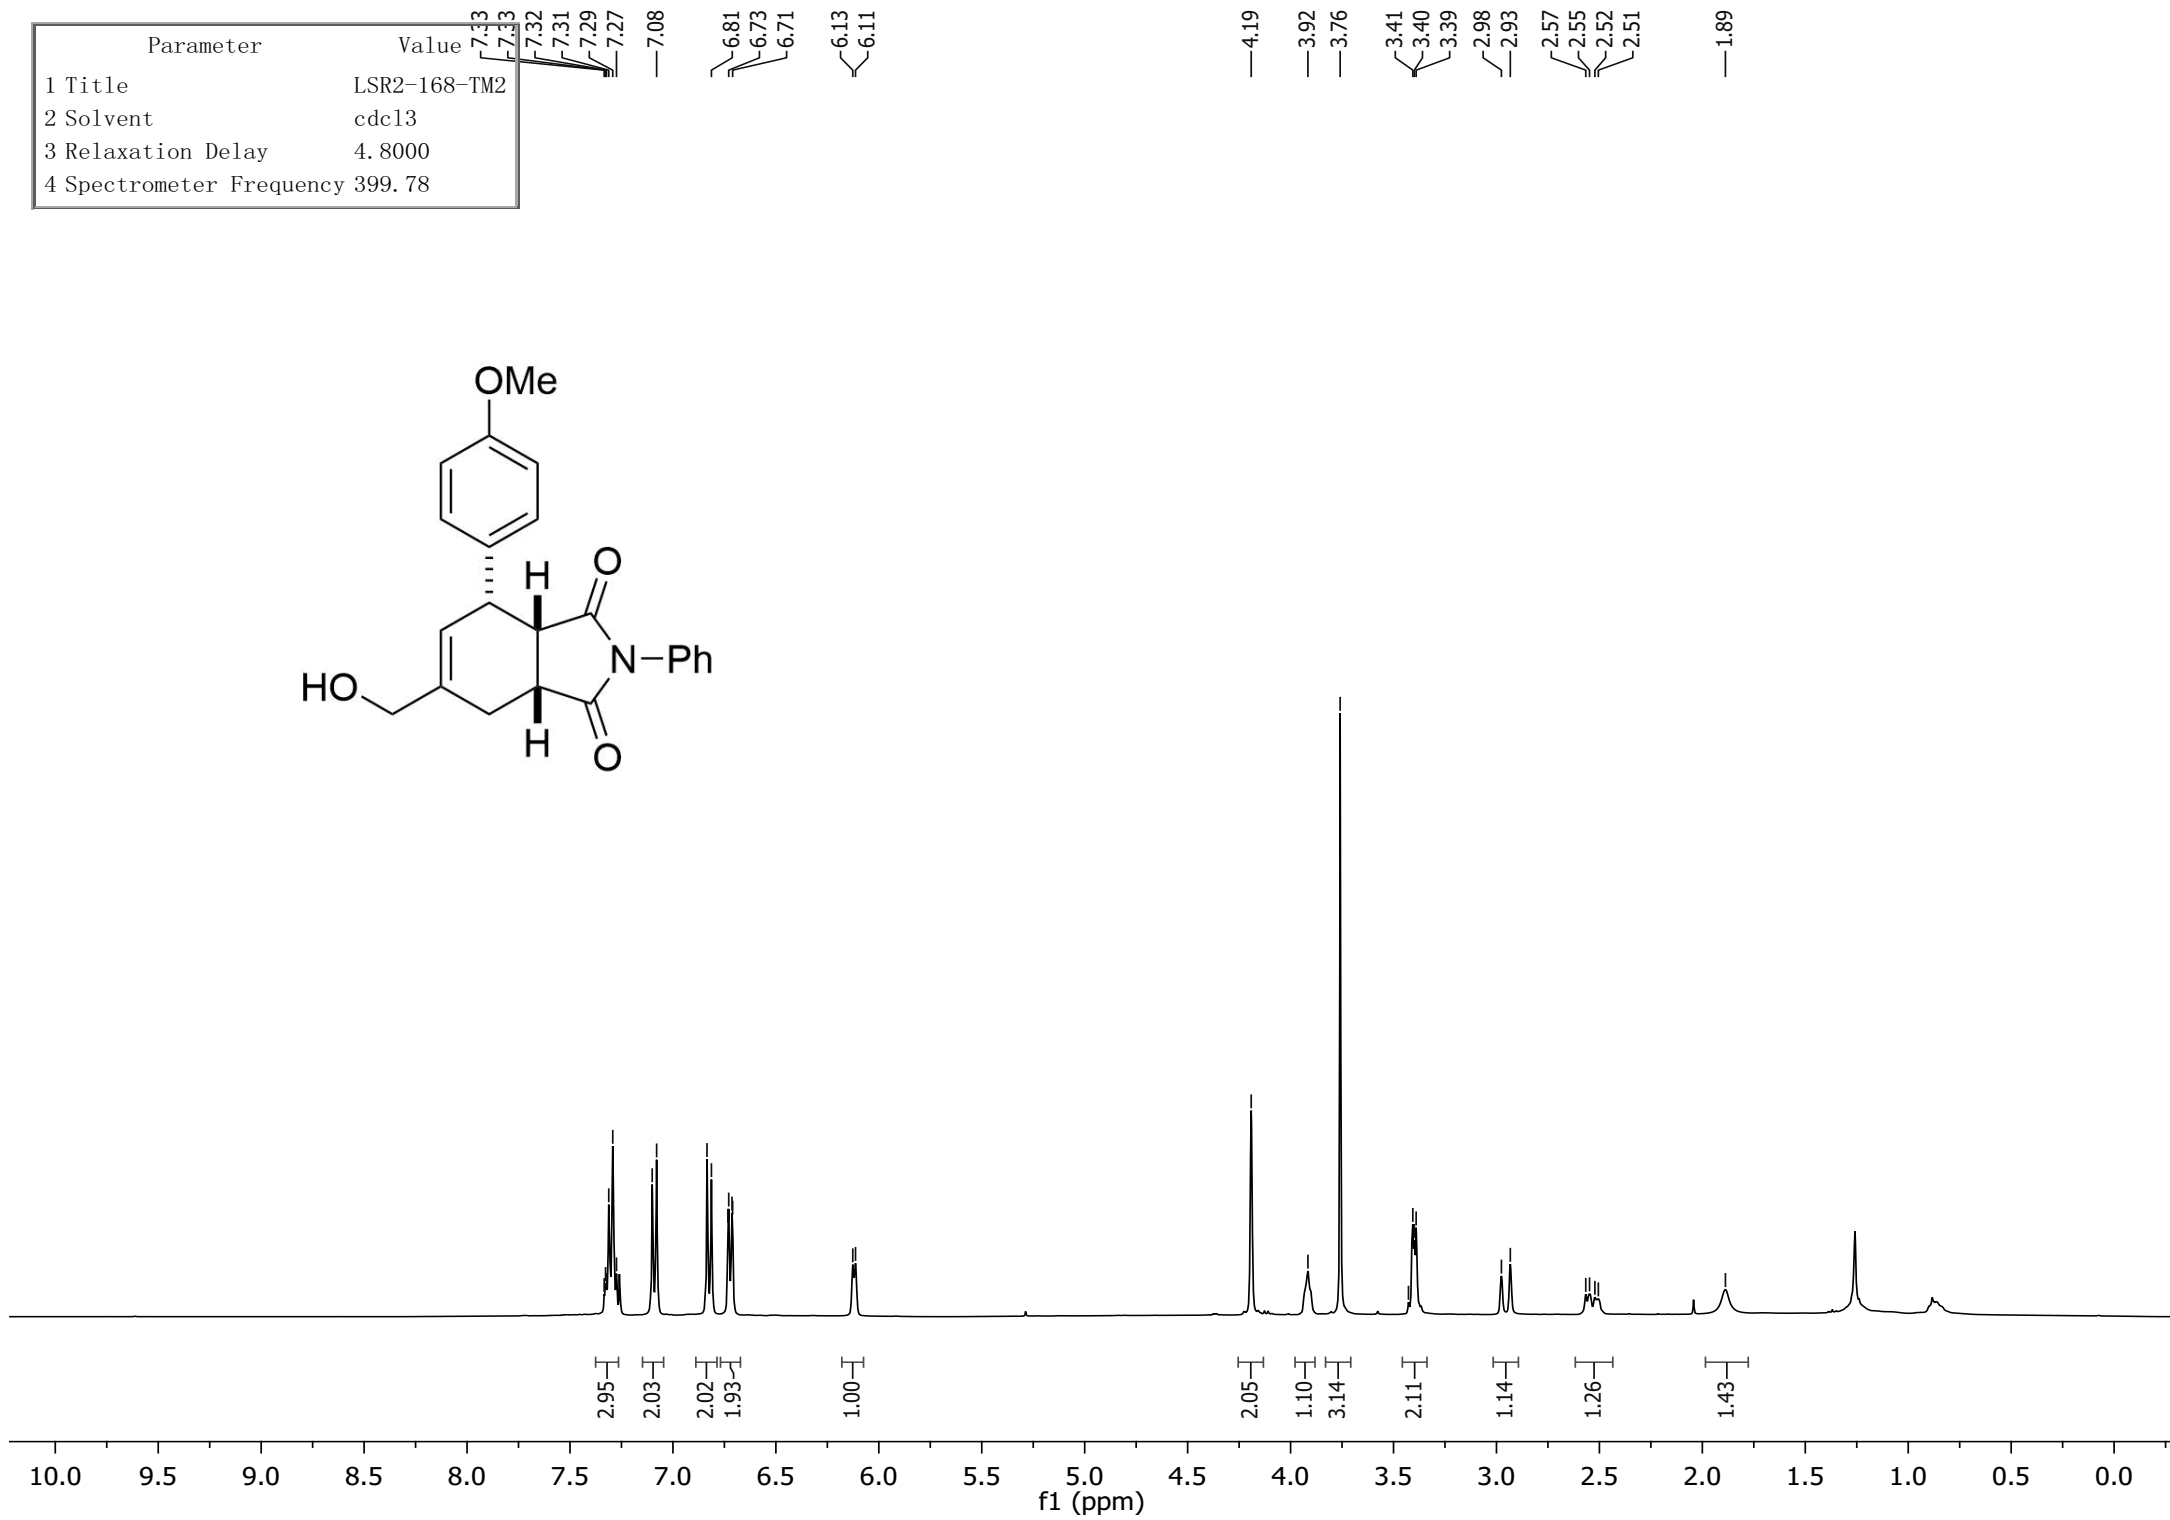

178.61  
176.37

158.93

138.42  
130.20  
130.14  
128.82  
128.36  
126.18  
124.16  
113.88

66.03

55.27

45.18

40.44

38.63

22.88

| Parameter                | Value          |
|--------------------------|----------------|
| 1 Title                  | LSR2-168-TM2-C |
| 2 Solvent                | cdcl3          |
| 3 Relaxation Delay       | 1.0000         |
| 4 Spectrometer Frequency | 100.53         |

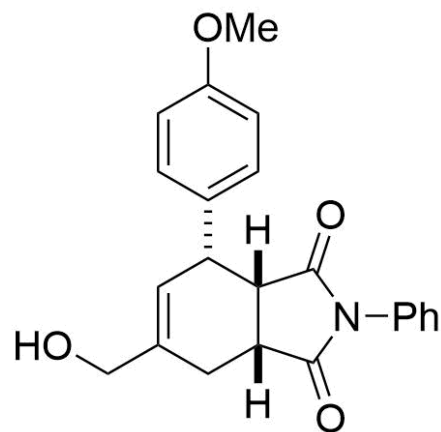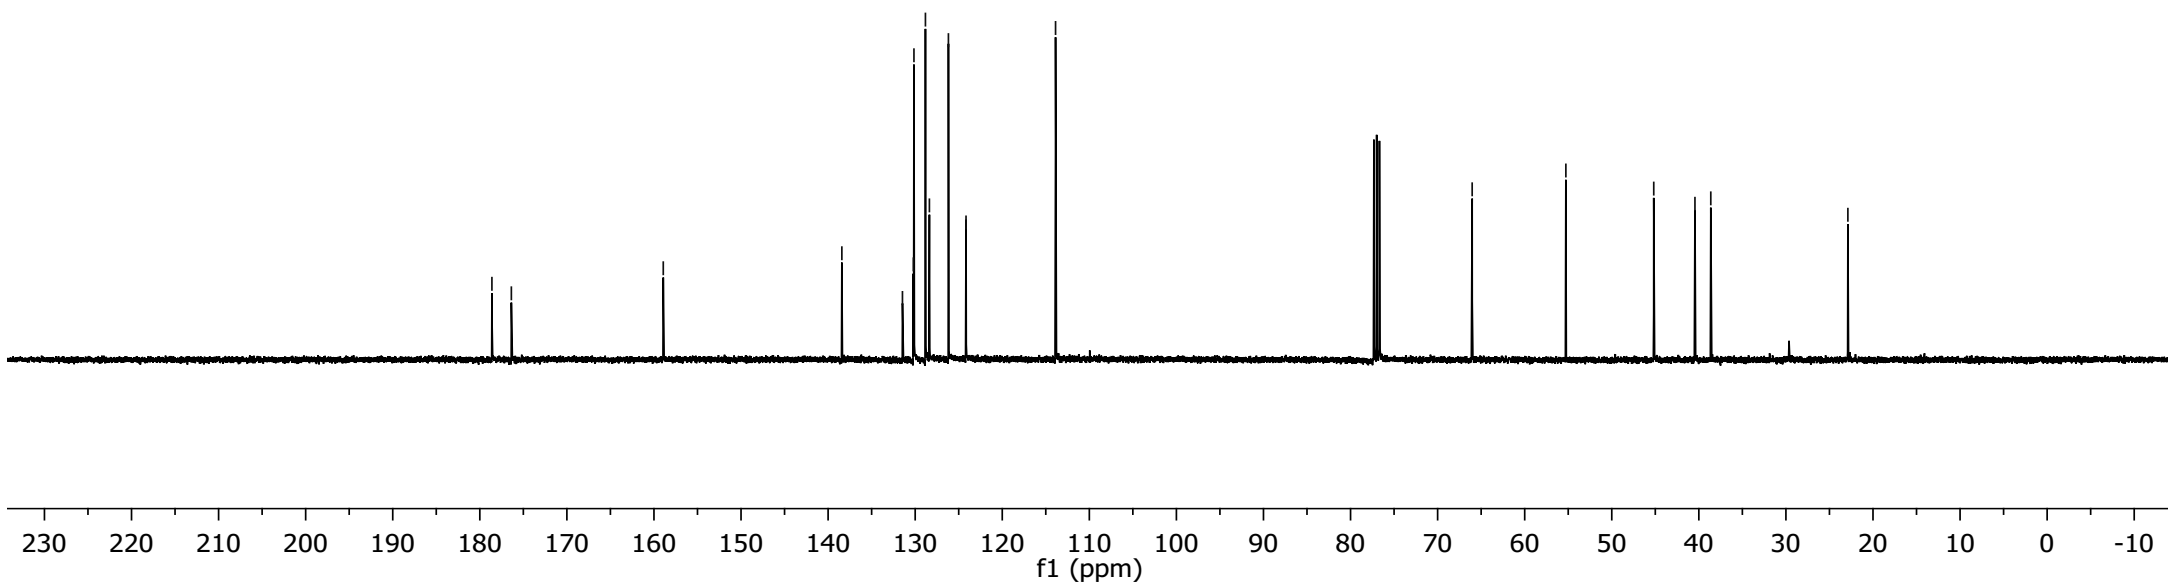

LSR-2-168-cosy-2

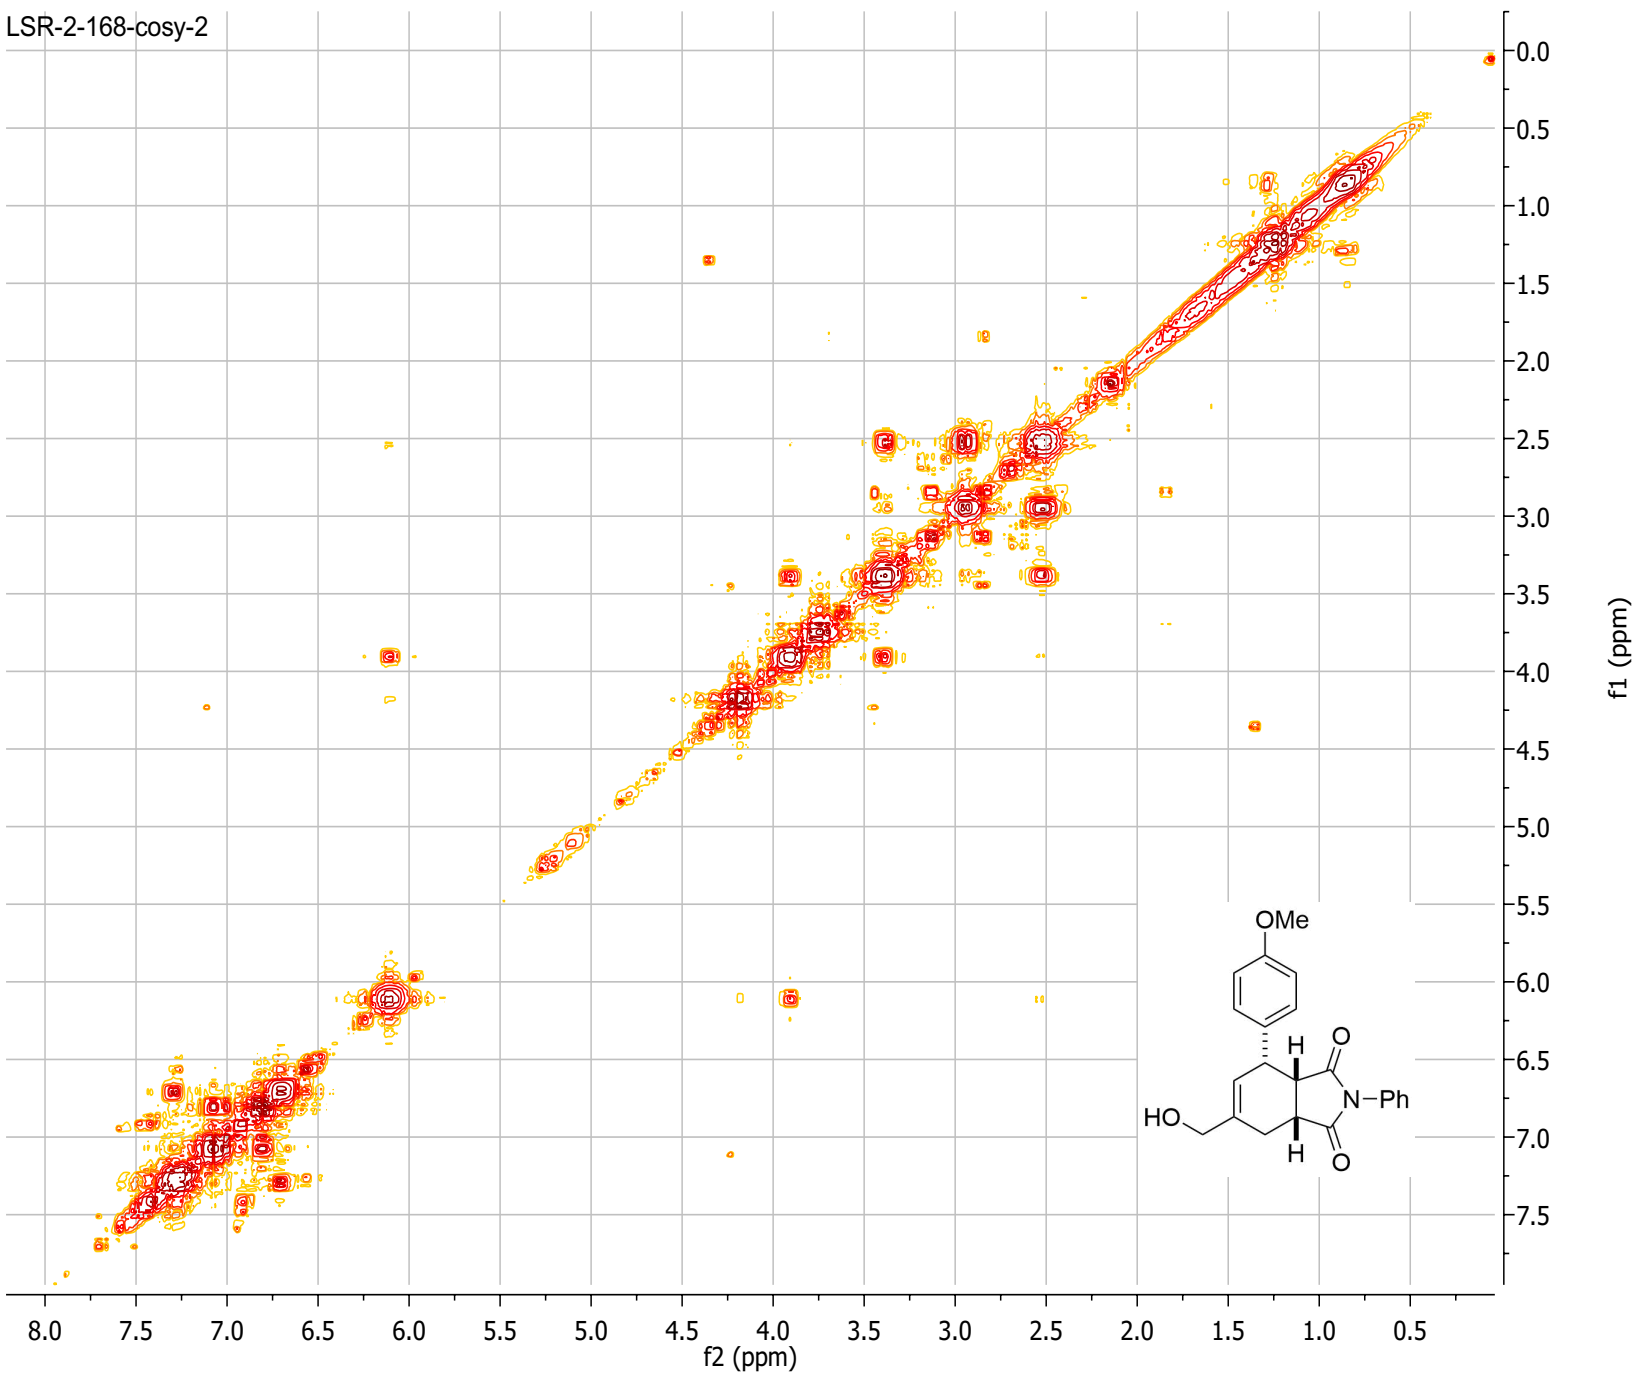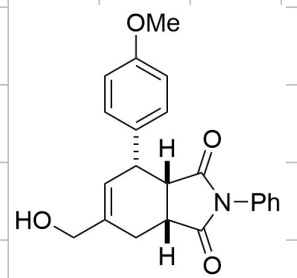

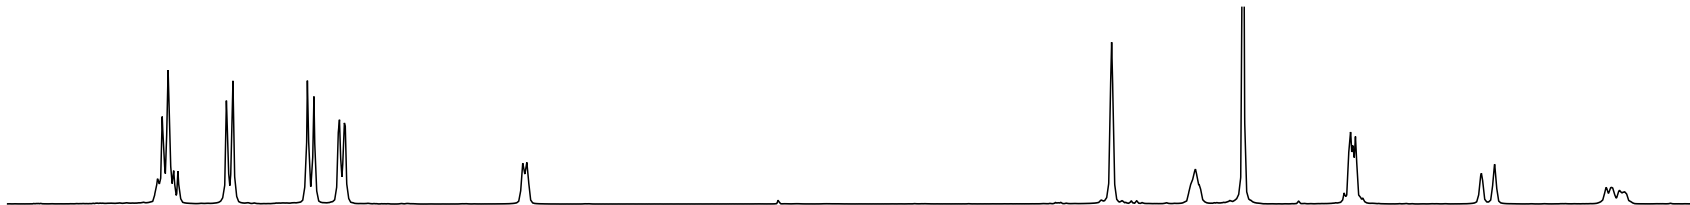

LSR2-168-NOE  
new experiment

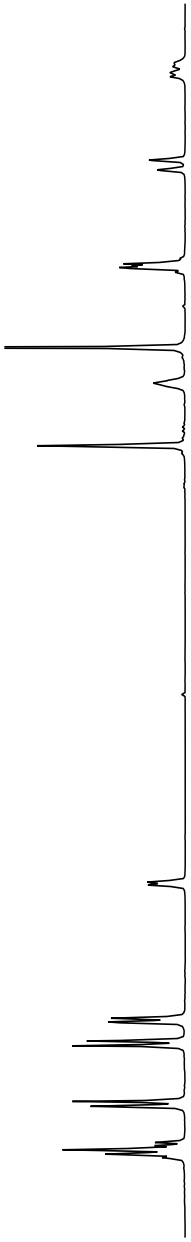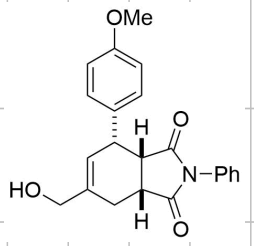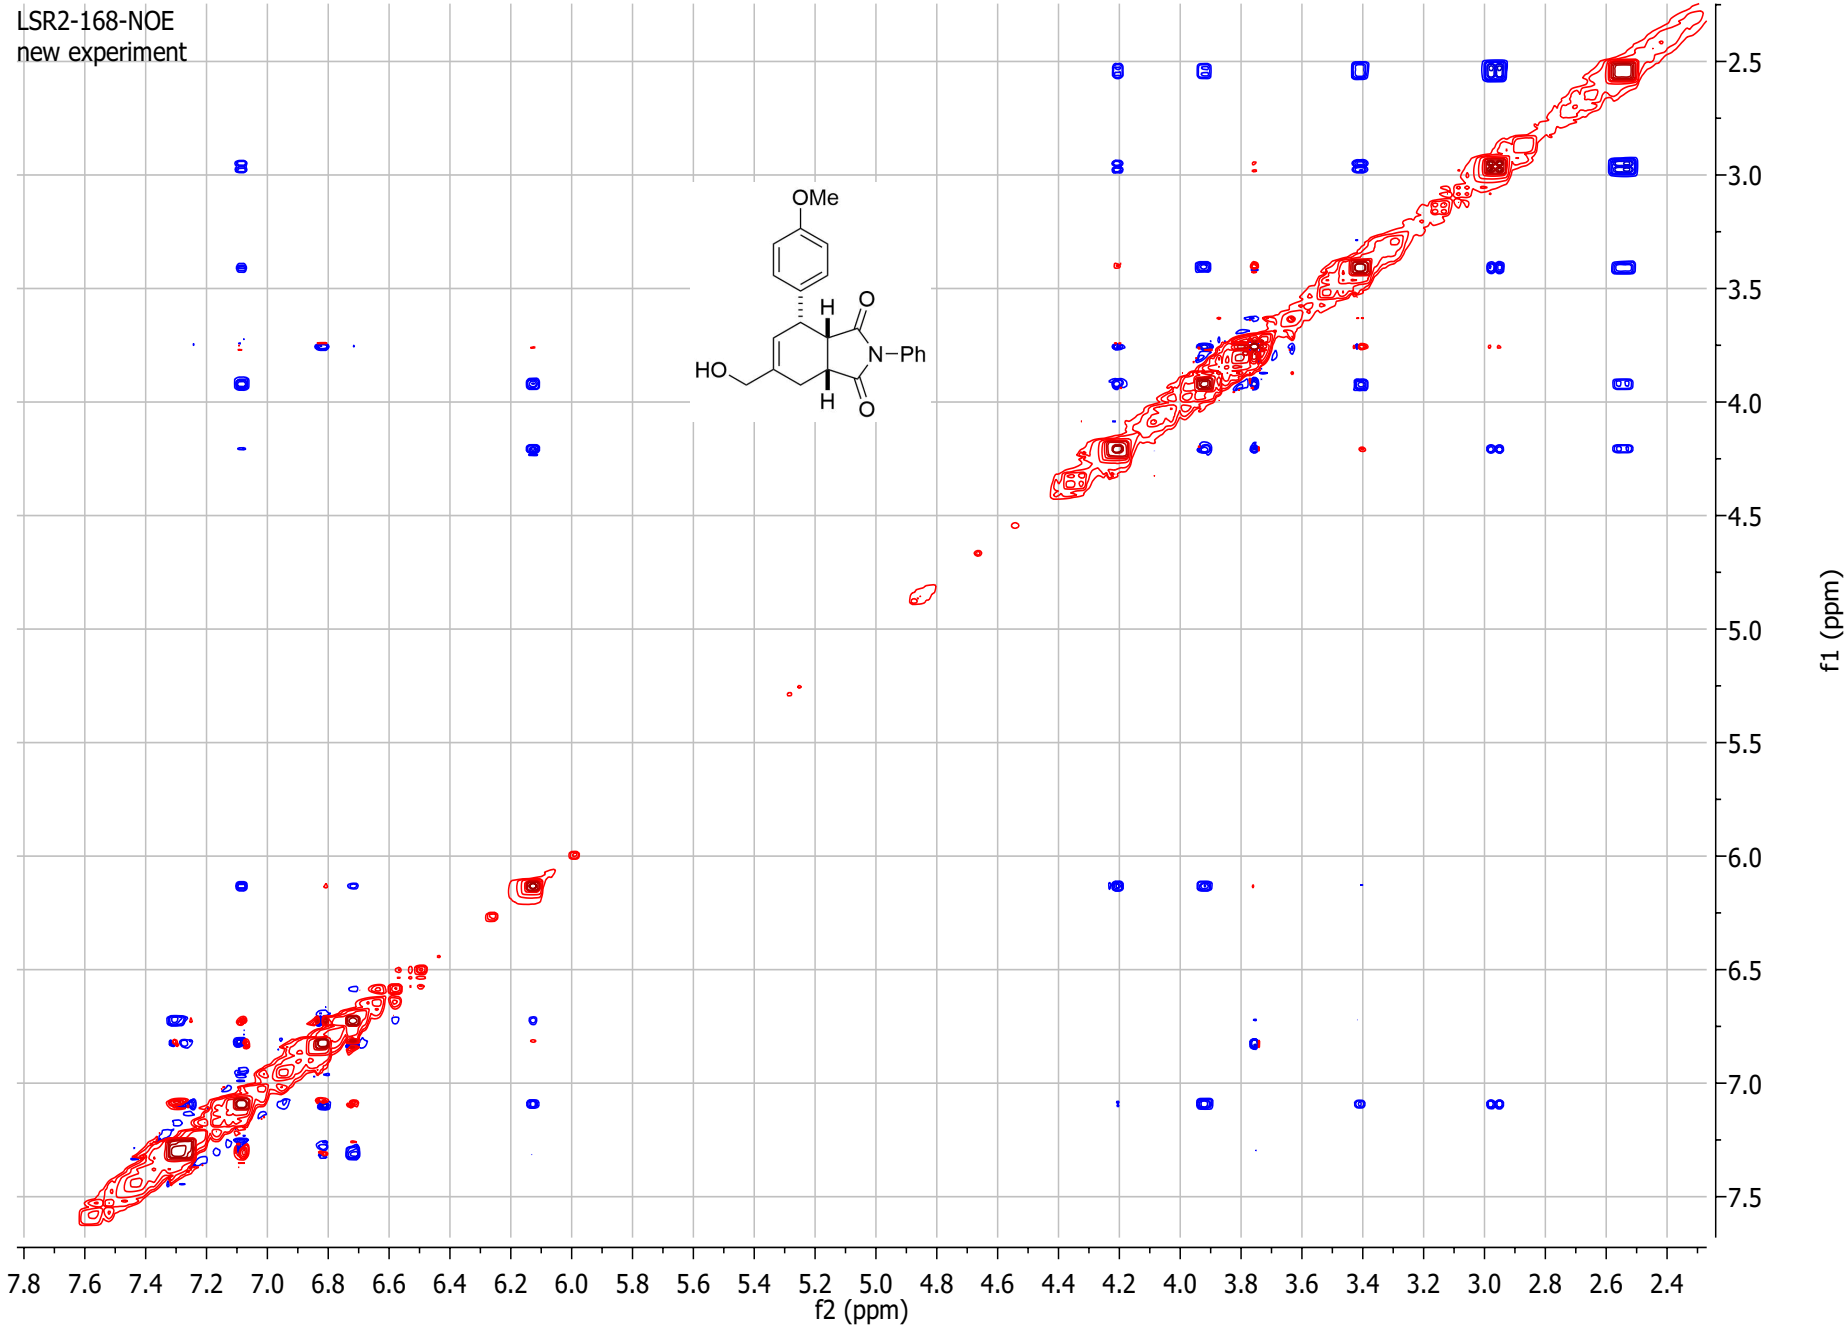



| Parameter                | Value        |
|--------------------------|--------------|
| 1 Title                  | LSR2-171-TM1 |
| 2 Solvent                | cdcl3        |
| 3 Relaxation Delay       | 4.8000       |
| 4 Spectrometer Frequency | 399.78       |

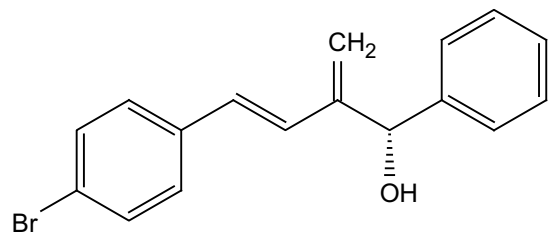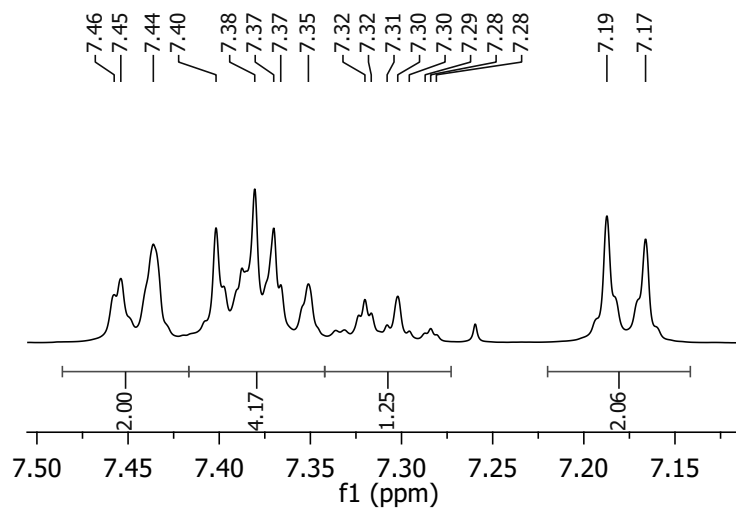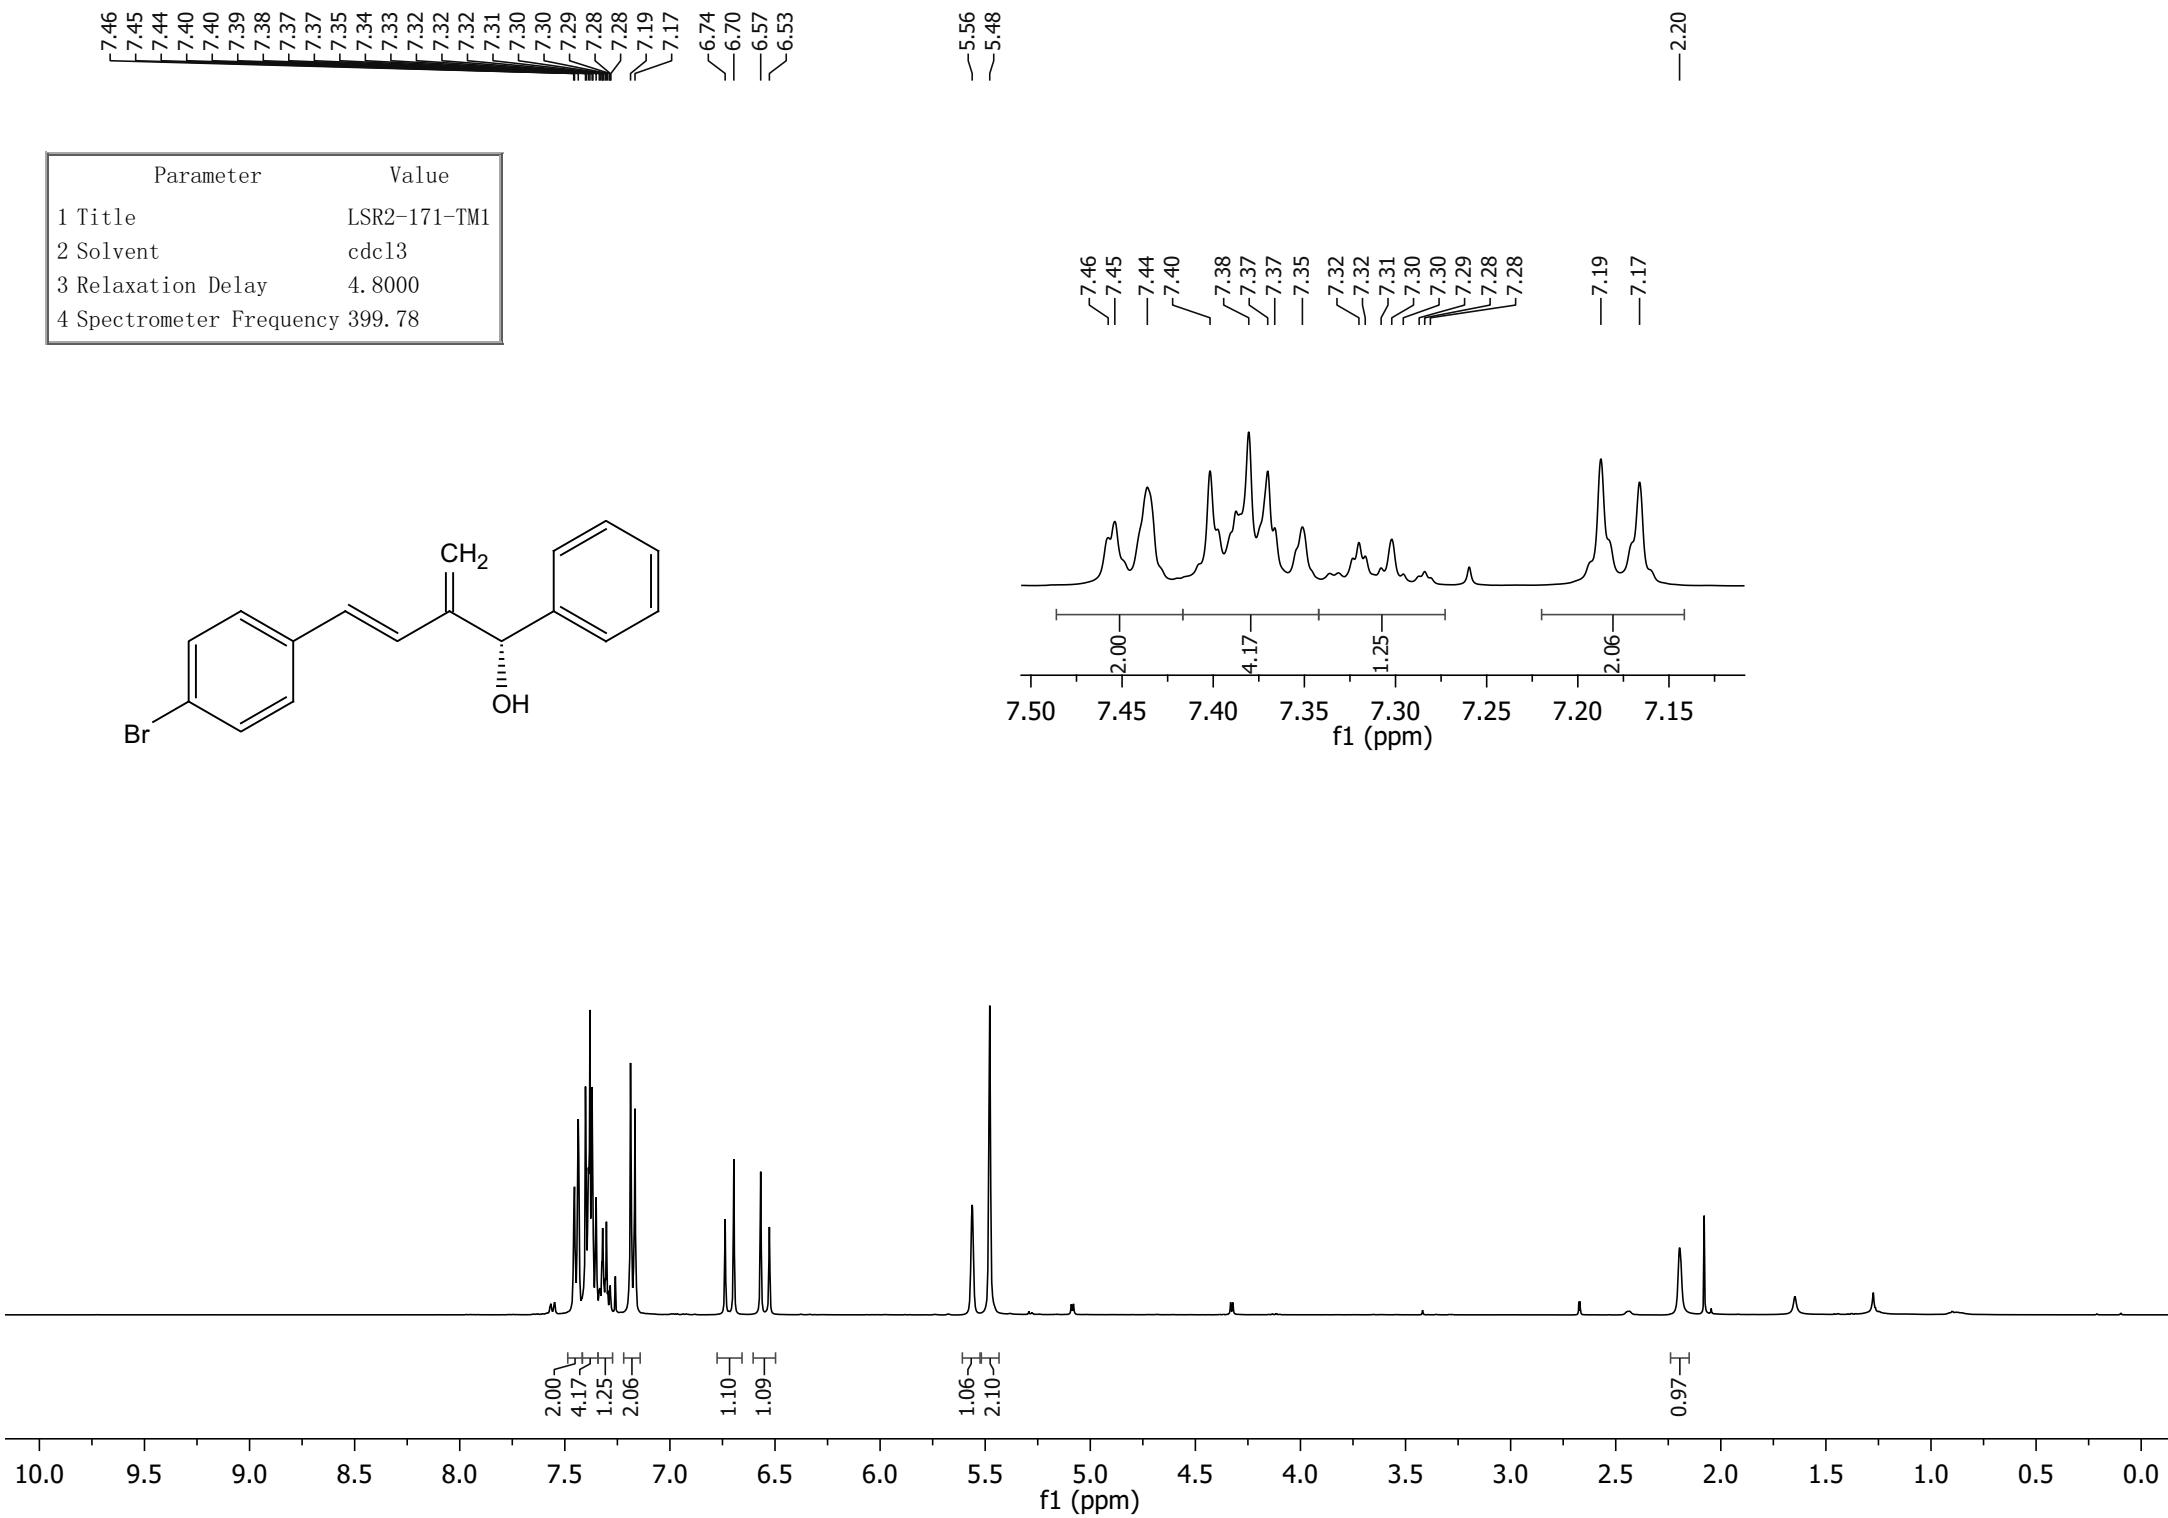

| Parameter                | Value            |
|--------------------------|------------------|
| 1 Title                  | LSR2-171-TM1-2-C |
| 2 Solvent                | cdcl3            |
| 3 Relaxation Delay       | 1.0000           |
| 4 Spectrometer Frequency | 100.53           |

—147.12 —141.77 —135.97 —131.62 —126.82 —121.38 —116.63 —74.40

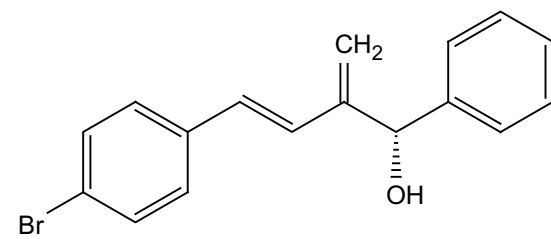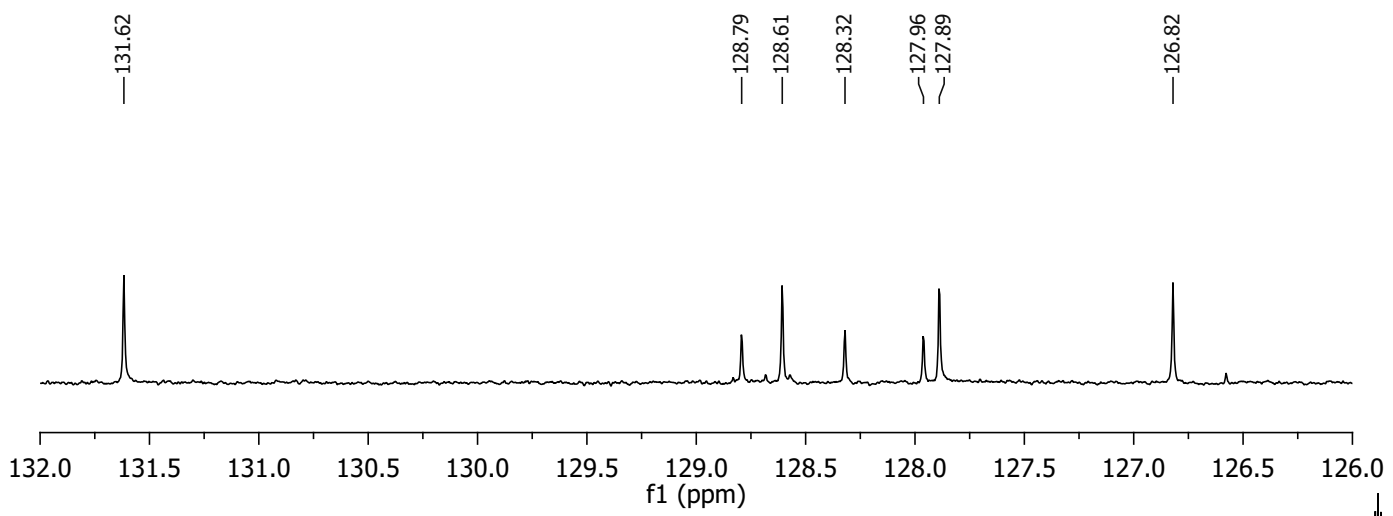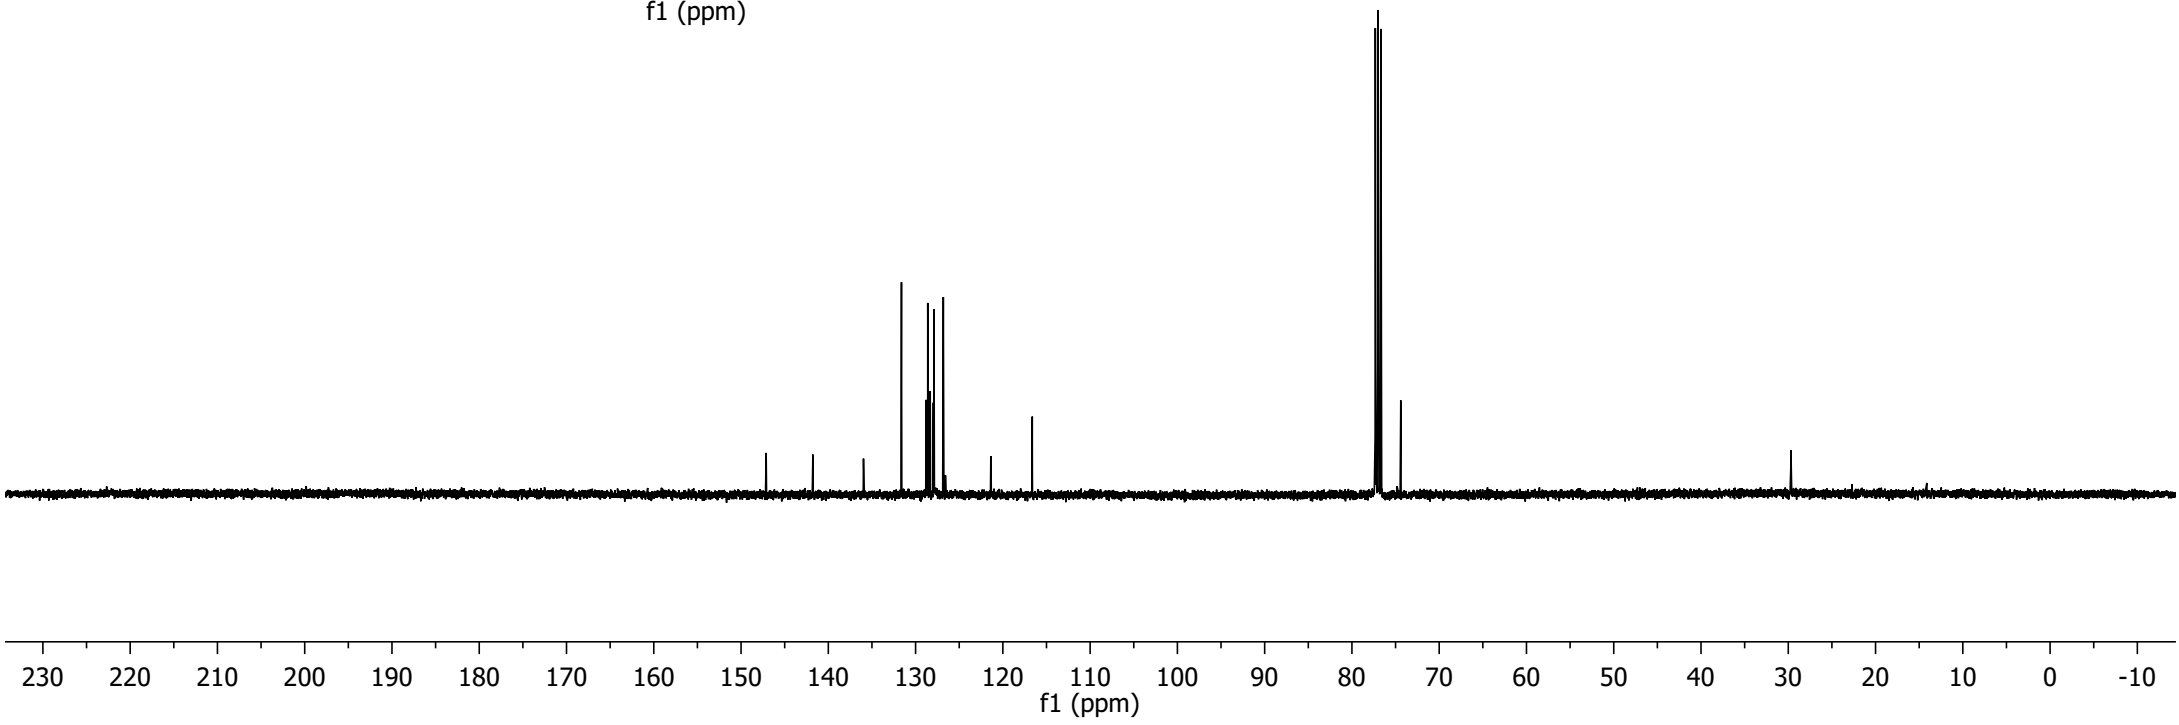

| Parameter                       | Value        |
|---------------------------------|--------------|
| 1 Title                         | LSR2-17M-Tol |
| 2 Svlnct                        | d32d12       |
| M Relaxative Delay              | 4.7888       |
| 4 S0edtrvmetr preFuecdy Mqq. 97 |              |

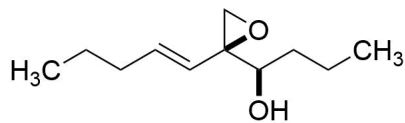

5.85  
5.83  
5.81  
5.81  
5.79  
5.77  
5.61  
5.60  
5.60  
5.57  
5.56  
5.56  
3.73  
3.72  
3.71  
3.70  
2.95  
2.94  
2.69  
2.68  
2.04  
2.03  
2.02  
2.01  
1.97  
1.52  
1.40  
1.35  
0.94  
0.93  
0.92  
0.91  
0.89  
0.88  
0.87

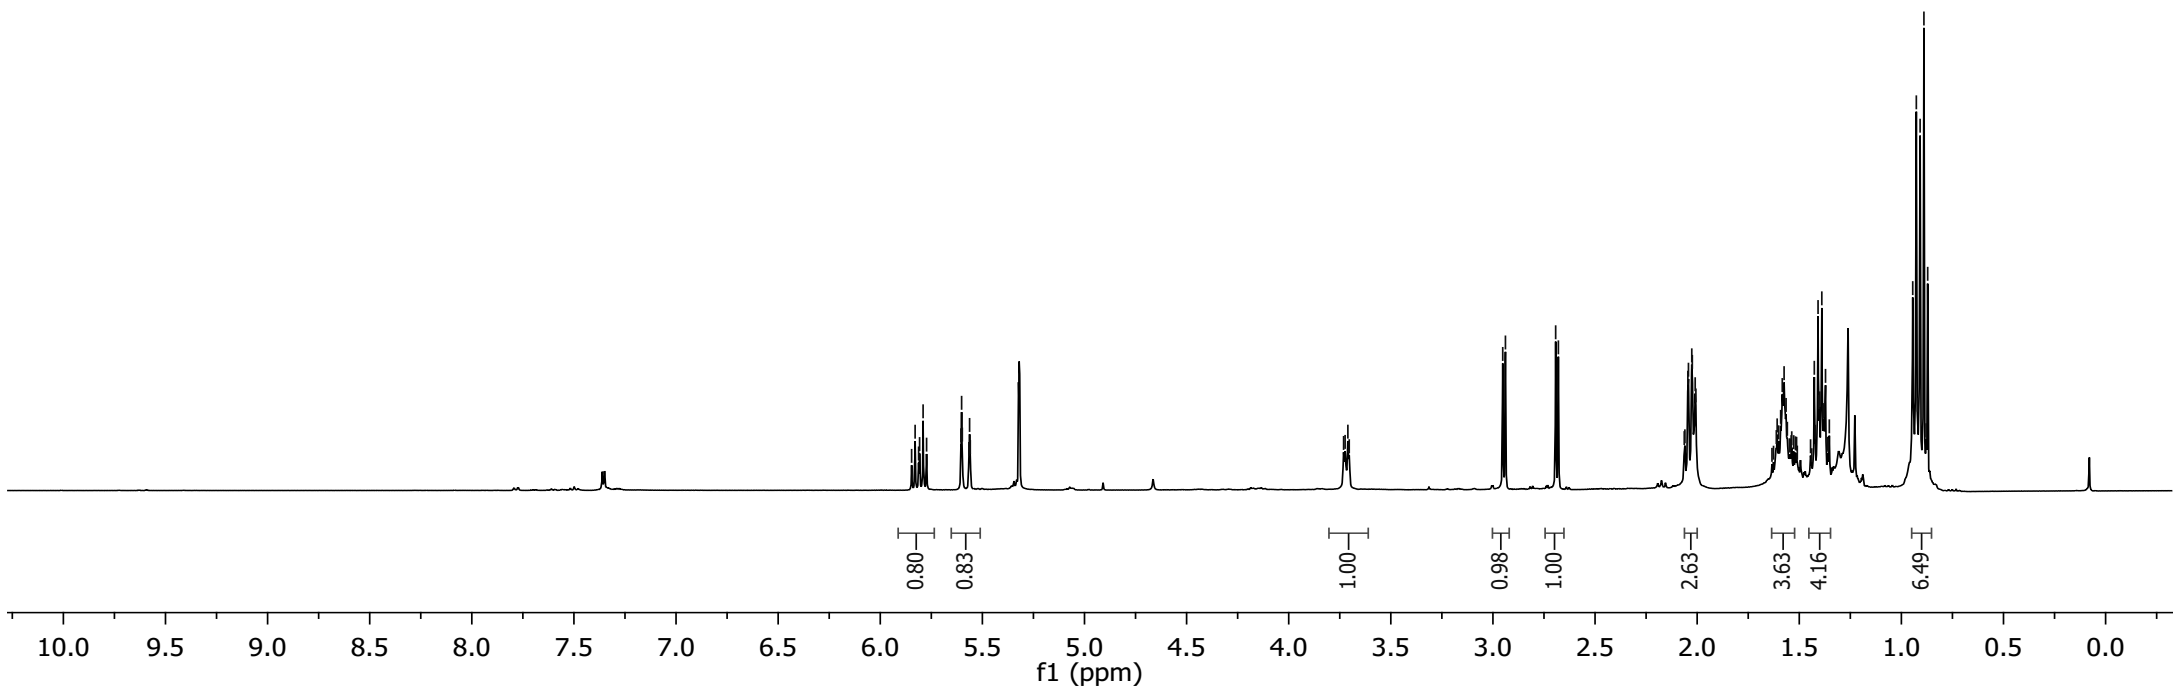

| Parameter                | Value          |
|--------------------------|----------------|
| 1 Title                  | LSR2-17M-To1-C |
| 2 Svlnect                | d32d12         |
| M Relaxativc Delay       | 1.8888         |
| 4 S0edtrvmeter preFuecdy | 188.54         |

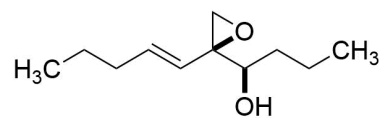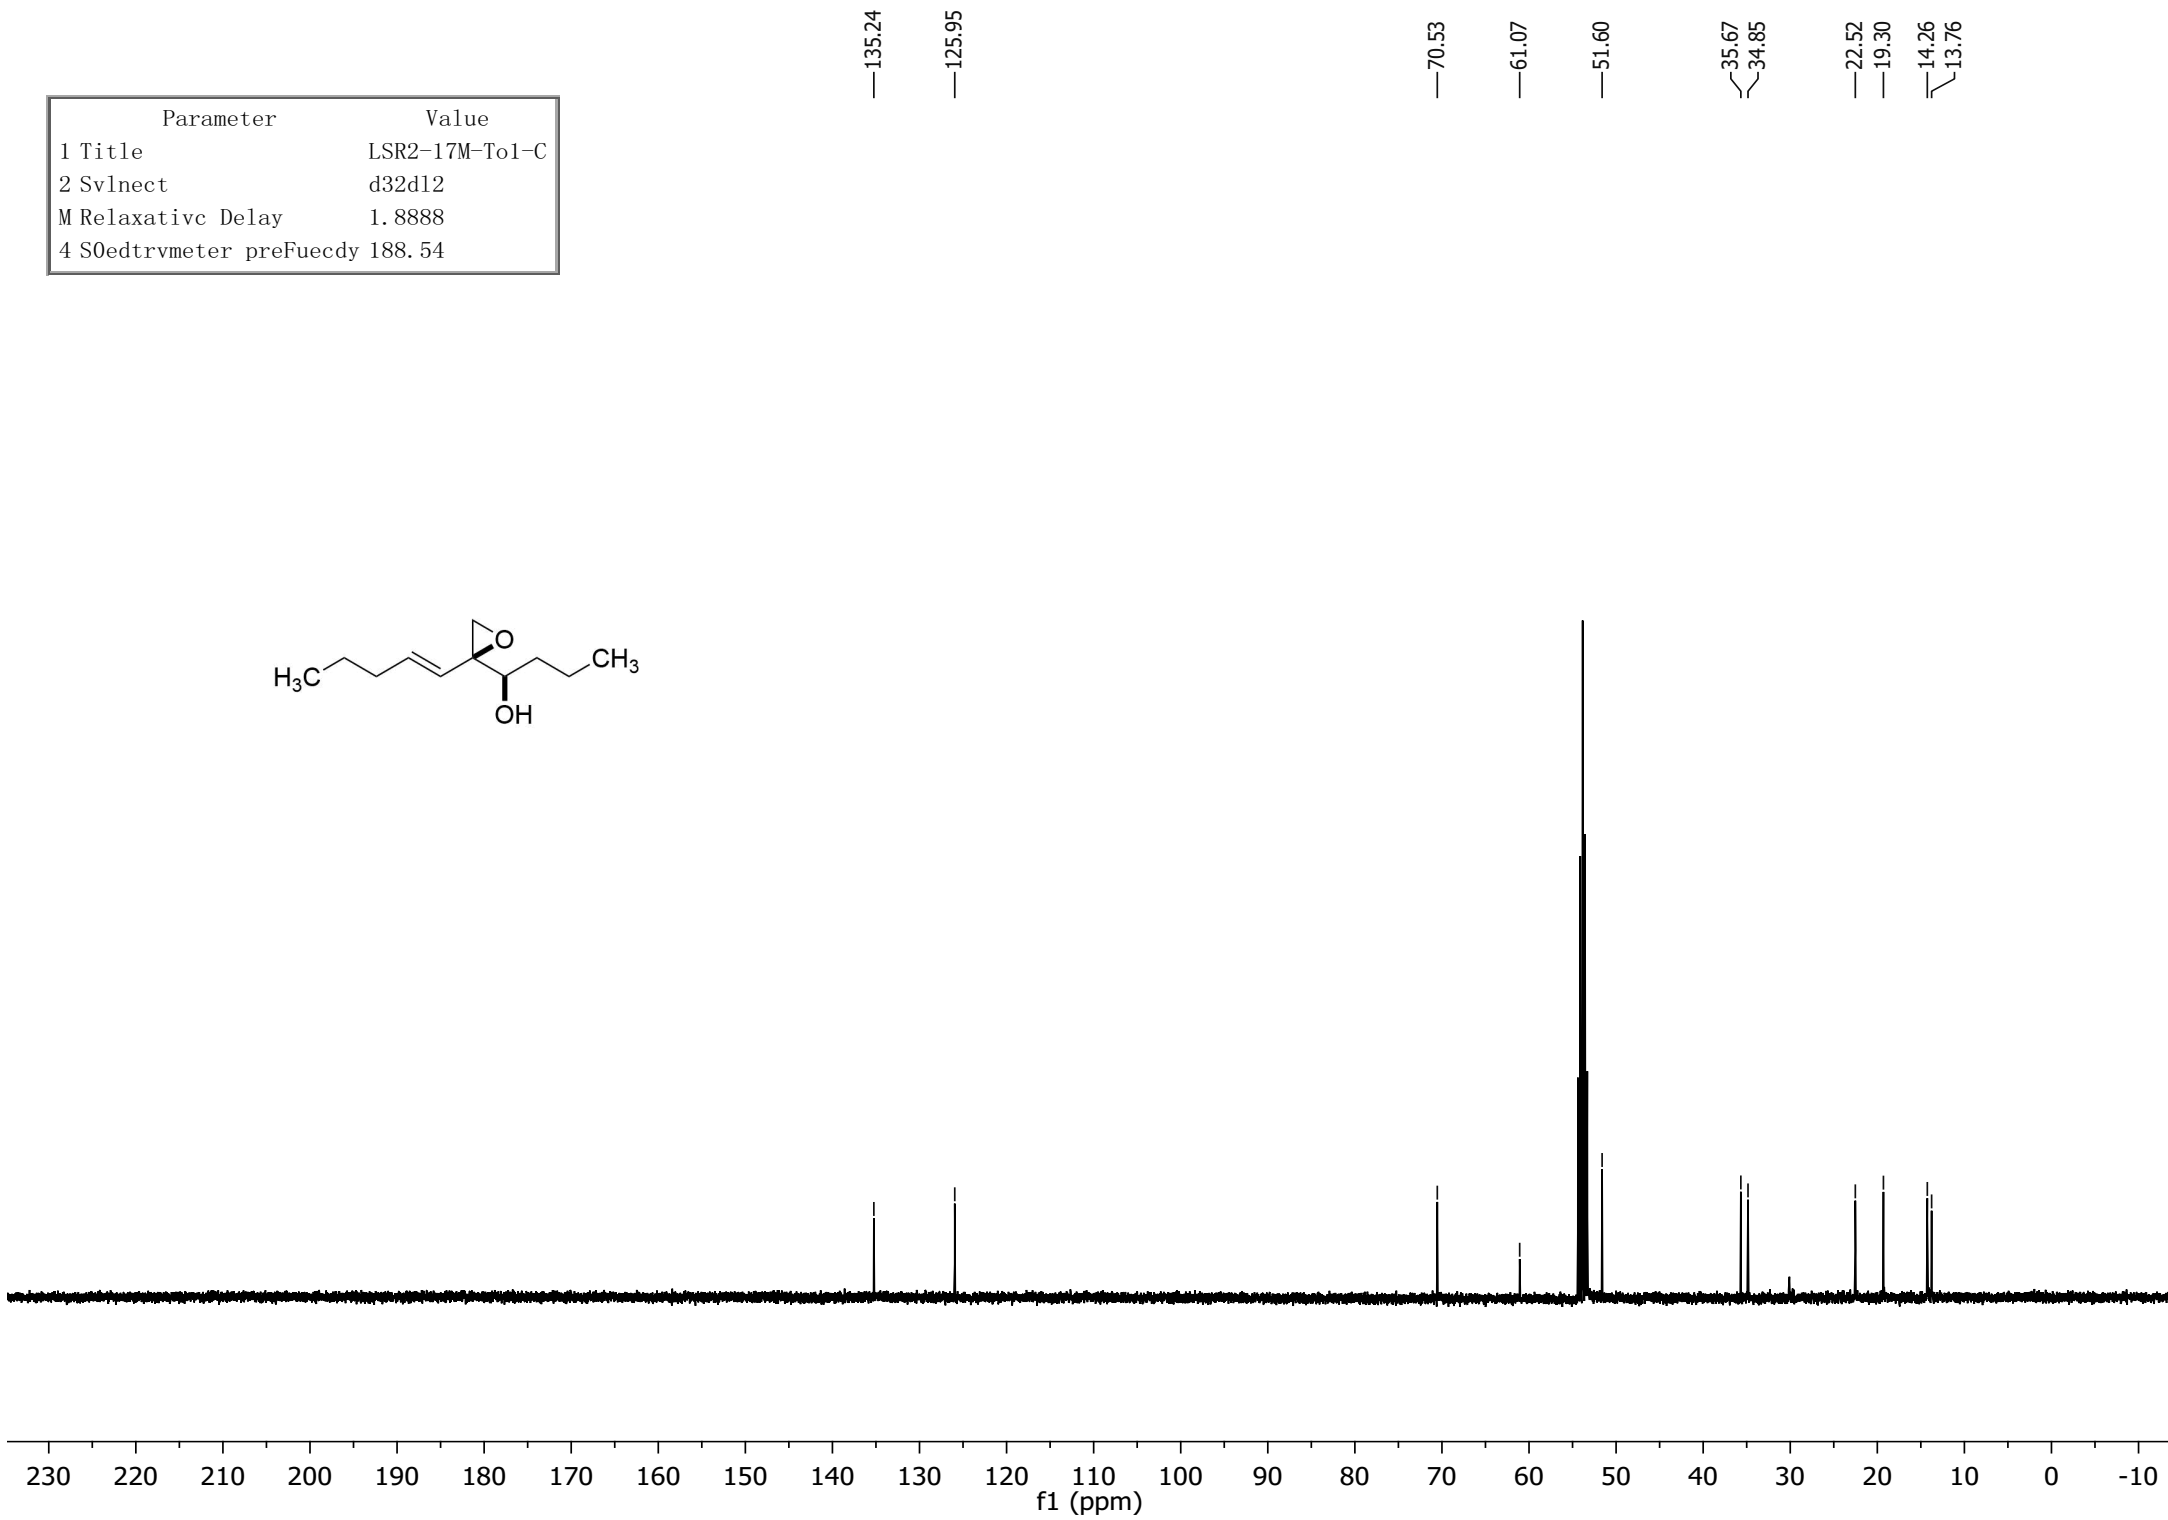

Supplement: NIHMS1037285-supplement-supporting_information.pdf [file NIHMS1037285-supplement-supporting_information.pdf]
